# Supplementary material for: Landscape of Variability in Chemosensory Genes Associated With Dietary Preferences in Indian Population: Analysis of 1029 Indian Genomes
Source: Front Genet. 2022 Jul 12;13:878134. doi: 10.3389/fgene.2022.878134 (PMC9315315; doi:10.3389/fgene.2022.878134)
Supplement: Supplementary file 2 [file Table3.xlsx]

## Sheet: Supplementary3
Supplemental Table 3: High FST variants oberved between IndiGen Populations and populations from 1000 Genomes. These high FST variants also showed high derived allele frequency (deltaDAF>= 0.5) in any of the Indigen population.
Variant information hg38 annotation					Derived allele frequency							DeltaDAF										Population differentiation FST																	SNP annotation
CHROM	POS	rsID	ANC	DER	Ind	Ind1	Ind2	Ind3	YRI	CEU	CHB	deltaDAF_IND1_YRI	deltaDAF_IND2_YRI	deltaDAF_IND3_YRI	deltaDAF_IND1_CEU	deltaDAF_IND2_CEU	deltaDAF_IND3_CEU	deltaDAF_IND1_CHB	deltaDAF_IND2_CHB	deltaDAF_IND3_CHB	MAX deltaDAF	IND1_2_3	IND1_2	IND2_3	IND1_3	YRI_CHB	CEU_YRI	CEU_CHB	IND1_YRI	IND2_YRI	IND3_YRI	IND1_CEU	IND2_CEU	IND3_CEU	IND1_CHB	IND2_CHB	IND3_CHB	MaxFST	location	GENE	RefGene_function
1	167897614	rs374181397	A	C	0.08	1	0	0	0	0	0	1	0	0	1	0	0	1	0	0	1	0.787	1	0	0.826	0	0	0	0.991	0.026	0.25	1	0	0.35	1	0	0.36	1	intronic	ADCY10	.
1	167897632	rs75086802	A	T	0.42	1	0.4	0.23	0	0	0	1	0.4	0.23	1	0.4	0.23	1	0.4	0.23	1	0.165	0.407	0.053	0.532	0	0	0	1	0.692	0.626	1	0.676	0.607	1	0.683	0.616	1	intronic	ADCY10	.
1	167897640	rs78106823	A	C	0.61	1	0.57	0.38	0	0	0	1	0.57	0.38	1	0.57	0.38	1	0.57	0.38	1	0.168	0.308	0.032	0.426	0	0	0	1	0.776	0.731	1	0.763	0.716	1	0.769	0.723	1	intronic	ADCY10	.
17	3584668	rs224538	T	C	0.73	0.95	0.71	0.63	0.08	0.6	0.96	0.87	0.63	0.55	0.35	0.11	0.03	-0.01	-0.25	-0.33	0.87	0.096	0.136	0.016	0.216	0.875	0.469	0.318	0.851	0.581	0.469	0.261	0.027	0.003	0.003	0.176	0.261	0.875	intronic	TRPV1	.
21	35036616	rs2834739	G	A	0.76	0.86	0.84	0.77	0.02	0.41	0.76	0.83	0.81	0.75	0.45	0.43	0.36	0.1	0.08	0.01	0.83	0.009	0.001	0.007	0.021	0.725	0.366	0.218	0.856	0.784	0.714	0.352	0.328	0.248	0.031	0.013	0.003	0.856	intronic	RUNX1	.
21	34858862	rs2834653	C	A	0.62	0.86	0.68	0.6	0.03	0.45	0.84	0.83	0.65	0.57	0.41	0.23	0.15	0.02	-0.16	-0.24	0.83	0.064	0.088	0.009	0.15	0.804	0.395	0.284	0.842	0.591	0.502	0.301	0.088	0.035	0.004	0.072	0.133	0.842	intronic	RUNX1	.
21	34859859	rs2248720	A	C	0.64	0.86	0.7	0.62	0.04	0.49	0.85	0.82	0.66	0.58	0.37	0.21	0.13	0.01	-0.15	-0.23	0.82	0.056	0.074	0.009	0.132	0.797	0.414	0.253	0.828	0.599	0.511	0.263	0.076	0.028	0.005	0.063	0.121	0.828	intronic	RUNX1	.
3	7305380	rs56120020	G	A	0.93	0.88	0.91	0.97	0.14	0.97	0.96	0.75	0.77	0.83	-0.09	-0.06	0	-0.08	-0.05	0	0.83	0.011	0.006	0.012	0.037	0.809	0.818	0.004	0.719	0.762	0.818	0.042	0.015	0.006	0.029	0.007	0.005	0.818	intronic	GRM7	.
10	113014168	rs7904519	G	A	0.64	0.95	0.6	0.61	0.14	0.51	0.97	0.81	0.46	0.47	0.44	0.09	0.1	-0.02	-0.36	-0.35	0.81	0.113	0.233	0.003	0.233	0.815	0.271	0.424	0.775	0.373	0.364	0.355	0.018	0.015	0	0.287	0.287	0.815	intronic	TCF7L2	.
21	34890130	rs7281361	G	A	0.71	0.73	0.69	0.72	0.04	0.62	0.86	0.69	0.65	0.68	0.12	0.07	0.1	-0.13	-0.18	-0.14	0.69	0.002	0.001	0.001	0.004	0.812	0.55	0.145	0.699	0.591	0.62	0.024	0.006	0.017	0.05	0.082	0.059	0.812	intronic	RUNX1	.
21	34902544	rs8134608	C	A	0.66	0.73	0.62	0.66	0.04	0.59	0.86	0.69	0.58	0.62	0.14	0.04	0.07	-0.14	-0.24	-0.21	0.69	0.006	0.02	0.001	0.007	0.812	0.517	0.174	0.692	0.521	0.55	0.036	0.002	0.005	0.055	0.134	0.106	0.812	intronic	RUNX1	.
19	9209794	rs10415620	A	G	0.7	0.7	0.74	0.73	0.09	0.91	0.72	0.62	0.65	0.64	-0.21	-0.18	-0.19	-0.02	0.01	0	0.65	0.003	0.004	0.004	0.003	0.591	0.81	0.11	0.582	0.579	0.577	0.143	0.1	0.097	0.005	0.004	0.004	0.81	intergenic	OR7D2;OR7D4	.
19	9210341	rs8105335	T	C	0.69	0.7	0.74	0.73	0.09	0.91	0.72	0.62	0.65	0.64	-0.21	-0.18	-0.19	-0.02	0.02	0	0.65	0.003	0.003	0.004	0.003	0.591	0.81	0.11	0.582	0.581	0.575	0.143	0.098	0.098	0.005	0.004	0.004	0.81	intergenic	OR7D2;OR7D4	.
19	9209869	rs8110308	G	A	0.69	0.7	0.73	0.73	0.09	0.91	0.72	0.62	0.64	0.64	-0.21	-0.18	-0.19	-0.02	0.01	0	0.64	0.004	0.004	0.004	0.004	0.591	0.81	0.11	0.582	0.572	0.571	0.143	0.104	0.101	0.005	0.004	0.004	0.81	intergenic	OR7D2;OR7D4	.
10	113024079	rs11196193	C	T	0.63	0.95	0.6	0.61	0.14	0.51	0.97	0.8	0.45	0.46	0.44	0.09	0.1	-0.02	-0.37	-0.36	0.8	0.115	0.236	0.003	0.236	0.81	0.264	0.424	0.769	0.363	0.354	0.355	0.016	0.014	0	0.291	0.29	0.81	intronic	TCF7L2	.
10	113033692	rs12359102	A	G	0.64	0.95	0.61	0.62	0.14	0.53	0.97	0.8	0.47	0.47	0.42	0.08	0.09	-0.02	-0.35	-0.35	0.8	0.111	0.222	0.003	0.234	0.81	0.286	0.403	0.769	0.38	0.357	0.334	0.014	0.008	0	0.277	0.287	0.81	intronic	TCF7L2	.
10	113033478	rs7086857	G	A	0.64	0.95	0.61	0.62	0.14	0.53	0.97	0.8	0.47	0.48	0.42	0.08	0.09	-0.02	-0.36	-0.35	0.8	0.11	0.226	0.003	0.227	0.81	0.286	0.403	0.769	0.374	0.366	0.334	0.012	0.01	0	0.281	0.28	0.81	intronic	TCF7L2	.
10	113027331	rs7907610	G	A	0.63	0.95	0.6	0.61	0.14	0.51	0.97	0.8	0.45	0.47	0.44	0.09	0.1	-0.02	-0.37	-0.35	0.8	0.114	0.236	0.003	0.234	0.81	0.264	0.424	0.769	0.363	0.357	0.355	0.016	0.015	0	0.291	0.287	0.81	intronic	TCF7L2	.
10	113017637	rs7918599	T	C	0.63	0.95	0.6	0.61	0.14	0.51	0.97	0.8	0.45	0.47	0.44	0.09	0.1	-0.02	-0.37	-0.35	0.8	0.113	0.236	0.003	0.231	0.81	0.264	0.424	0.769	0.363	0.361	0.355	0.016	0.016	0	0.291	0.284	0.81	intronic	TCF7L2	.
10	113061490	rs11196212	C	T	0.63	0.95	0.59	0.62	0.12	0.56	0.94	0.83	0.47	0.5	0.39	0.04	0.06	0.01	-0.35	-0.32	0.83	0.114	0.239	0.003	0.23	0.805	0.35	0.33	0.798	0.391	0.392	0.307	0.001	0.001	0.006	0.254	0.245	0.805	intronic	TCF7L2	.
10	113050481	rs12265291	C	T	0.64	0.94	0.61	0.61	0.15	0.52	0.97	0.79	0.46	0.46	0.42	0.09	0.09	-0.03	-0.36	-0.35	0.79	0.108	0.216	0.003	0.226	0.805	0.268	0.414	0.756	0.368	0.35	0.333	0.016	0.011	0.004	0.281	0.289	0.805	intronic	TCF7L2	.
10	113062190	rs4917642	T	C	0.63	0.95	0.6	0.62	0.12	0.56	0.94	0.83	0.48	0.5	0.39	0.04	0.07	0.01	-0.34	-0.32	0.83	0.112	0.236	0.004	0.228	0.805	0.35	0.33	0.798	0.395	0.395	0.307	0.002	0.002	0.006	0.251	0.242	0.805	intronic	TCF7L2	.
10	113061202	rs4918788	A	G	0.63	0.95	0.6	0.62	0.12	0.55	0.94	0.83	0.48	0.5	0.4	0.05	0.07	0.01	-0.34	-0.33	0.83	0.114	0.232	0.003	0.236	0.805	0.344	0.335	0.798	0.4	0.385	0.313	0.004	0.001	0.006	0.247	0.251	0.805	intronic	TCF7L2	.
10	113062048	rs4918789	G	T	0.63	0.95	0.6	0.62	0.12	0.56	0.94	0.83	0.48	0.5	0.39	0.04	0.06	0.01	-0.34	-0.32	0.83	0.114	0.235	0.003	0.234	0.805	0.35	0.33	0.798	0.396	0.388	0.307	0.002	0.001	0.006	0.251	0.249	0.805	intronic	TCF7L2	.
17	3599154	rs111685873	G	A	0.97	0.88	0.97	0.98	0.2	1	0.93	0.68	0.77	0.78	-0.12	-0.03	-0.02	-0.05	0.04	0.06	0.78	0.051	0.055	0.004	0.105	0.697	0.793	0.067	0.625	0.77	0.805	0.134	0.025	0.009	0.007	0.011	0.039	0.805	intronic	TRPV1	.
10	113026395	rs4128597	G	A	0.63	0.95	0.6	0.62	0.15	0.51	0.97	0.79	0.45	0.46	0.44	0.09	0.11	-0.02	-0.36	-0.35	0.79	0.113	0.232	0.003	0.231	0.8	0.251	0.424	0.758	0.355	0.348	0.355	0.018	0.016	0	0.287	0.284	0.8	intronic	TCF7L2	.
10	113023644	rs6585203	G	C	0.63	0.95	0.6	0.61	0.15	0.51	0.97	0.79	0.45	0.46	0.44	0.09	0.1	-0.02	-0.37	-0.36	0.79	0.115	0.236	0.003	0.236	0.8	0.251	0.424	0.758	0.35	0.342	0.355	0.016	0.014	0	0.291	0.29	0.8	intronic	TCF7L2	.
17	33009962	rs28903	C	A	0.76	0.95	0.77	0.77	0.13	0.85	0.95	0.81	0.64	0.64	0.09	-0.08	-0.08	0	-0.17	-0.18	0.81	0.045	0.099	0.003	0.105	0.796	0.681	0.043	0.789	0.578	0.563	0.043	0.015	0.02	0.006	0.102	0.109	0.796	intergenic	SPACA3;ASIC2	.
21	34872901	rs2300395	T	C	0.71	0.79	0.66	0.72	0.05	0.67	0.86	0.74	0.61	0.66	0.12	0	0.05	-0.07	-0.2	-0.14	0.74	0.011	0.031	0.004	0.006	0.795	0.588	0.094	0.732	0.549	0.609	0.026	0.004	0.001	0.016	0.097	0.053	0.795	intronic	RUNX1	.
17	3600627	rs9895612	C	T	0.97	0.89	0.96	0.98	0.21	1	0.93	0.67	0.75	0.77	-0.11	-0.04	-0.02	-0.04	0.03	0.06	0.77	0.041	0.036	0.008	0.096	0.681	0.779	0.067	0.615	0.747	0.792	0.127	0.031	0.009	0.004	0.006	0.039	0.792	intronic	TRPV1	.
17	33003846	rs6505324	G	T	0.76	0.95	0.78	0.76	0.14	0.85	0.95	0.81	0.64	0.63	0.09	-0.07	-0.09	0	-0.17	-0.18	0.81	0.047	0.095	0.002	0.112	0.791	0.675	0.043	0.783	0.578	0.547	0.043	0.013	0.024	0.006	0.098	0.116	0.791	intergenic	SPACA3;ASIC2	.
17	33008408	rs9894733	G	C	0.76	0.95	0.77	0.77	0.14	0.85	0.95	0.81	0.64	0.63	0.09	-0.08	-0.08	0	-0.17	-0.18	0.81	0.046	0.099	0.003	0.107	0.791	0.675	0.043	0.783	0.572	0.555	0.043	0.015	0.02	0.006	0.102	0.111	0.791	intergenic	SPACA3;ASIC2	.
10	113020874	rs11196191	C	A	0.63	0.95	0.6	0.61	0.14	0.51	0.95	0.8	0.45	0.47	0.44	0.09	0.1	0	-0.35	-0.34	0.8	0.115	0.236	0.003	0.236	0.791	0.264	0.397	0.769	0.363	0.354	0.355	0.016	0.014	0.005	0.267	0.266	0.791	intronic	TCF7L2	.
10	113021939	rs12258200	C	T	0.63	0.95	0.6	0.61	0.14	0.51	0.95	0.8	0.46	0.47	0.44	0.09	0.1	0	-0.35	-0.34	0.8	0.114	0.236	0.003	0.233	0.791	0.264	0.397	0.769	0.364	0.359	0.355	0.016	0.015	0.005	0.266	0.263	0.791	intronic	TCF7L2	.
10	113002305	rs6585197	T	G	0.63	0.94	0.6	0.63	0.14	0.53	0.95	0.8	0.45	0.48	0.41	0.07	0.1	-0.01	-0.35	-0.32	0.8	0.101	0.22	0.003	0.2	0.791	0.281	0.381	0.754	0.359	0.376	0.317	0.009	0.015	0.002	0.27	0.248	0.791	intronic	TCF7L2	.
10	113008850	rs6585200	G	A	0.63	0.95	0.6	0.62	0.14	0.53	0.95	0.8	0.46	0.47	0.42	0.08	0.09	0	-0.35	-0.33	0.8	0.113	0.233	0.003	0.23	0.791	0.281	0.381	0.769	0.367	0.362	0.339	0.012	0.011	0.005	0.263	0.26	0.791	intronic	TCF7L2	.
17	3581074	rs150908	G	A	0.57	0.74	0.55	0.56	0	0.45	0.75	0.74	0.54	0.55	0.29	0.1	0.11	-0.01	-0.2	-0.19	0.74	0.037	0.086	0.003	0.074	0.744	0.453	0.16	0.791	0.505	0.511	0.169	0.013	0.019	0.007	0.078	0.067	0.791	intronic	TRPV1	.
12	88141799	rs2468222	G	A	0.9	0.92	0.88	0.89	0.19	0.95	0.99	0.73	0.68	0.69	-0.03	-0.07	-0.06	-0.07	-0.11	-0.1	0.73	0.001	0.002	0.004	0.001	0.787	0.73	0.024	0.681	0.657	0.661	0.001	0.02	0.018	0.057	0.074	0.071	0.787	intronic	CEP290	.
12	88144858	rs2468223	T	C	0.9	0.93	0.88	0.89	0.19	0.95	0.99	0.74	0.68	0.69	-0.02	-0.07	-0.06	-0.06	-0.11	-0.1	0.74	0.001	0.005	0.004	0.006	0.787	0.73	0.024	0.69	0.657	0.652	0.002	0.02	0.022	0.048	0.074	0.076	0.787	intronic	TMTC3	.
10	113047288	rs11196205	C	G	0.64	0.94	0.61	0.61	0.17	0.53	0.97	0.77	0.44	0.45	0.41	0.08	0.09	-0.03	-0.36	-0.35	0.77	0.107	0.216	0.003	0.223	0.785	0.247	0.408	0.732	0.343	0.328	0.328	0.014	0.01	0.004	0.281	0.286	0.785	intronic	TCF7L2	.
10	113051557	rs11196208	C	T	0.64	0.94	0.61	0.61	0.17	0.52	0.97	0.77	0.45	0.44	0.42	0.09	0.09	-0.03	-0.35	-0.36	0.77	0.107	0.213	0.003	0.226	0.785	0.242	0.414	0.732	0.348	0.325	0.333	0.018	0.01	0.004	0.277	0.29	0.785	intronic	TCF7L2	.
17	3599087	rs111246843	A	G	0.97	0.89	0.97	0.98	0.22	1	0.93	0.67	0.75	0.76	-0.11	-0.03	-0.02	-0.03	0.04	0.06	0.76	0.039	0.041	0.004	0.086	0.67	0.769	0.067	0.612	0.748	0.783	0.118	0.025	0.009	0.001	0.012	0.039	0.783	intronic	TRPV1	.
10	113021538	rs10787472	C	A	0.63	0.95	0.6	0.62	0.15	0.51	0.95	0.79	0.45	0.46	0.44	0.09	0.11	0	-0.35	-0.34	0.79	0.113	0.232	0.003	0.231	0.781	0.251	0.397	0.758	0.355	0.348	0.355	0.018	0.016	0.005	0.263	0.26	0.781	intronic	TCF7L2	.
10	113017965	rs10885406	G	A	0.63	0.95	0.6	0.61	0.15	0.51	0.95	0.79	0.45	0.46	0.44	0.09	0.1	0	-0.35	-0.34	0.79	0.115	0.236	0.003	0.237	0.781	0.251	0.397	0.758	0.35	0.341	0.355	0.016	0.014	0.005	0.267	0.267	0.781	intronic	TCF7L2	.
10	113018493	rs11196190	G	A	0.64	0.95	0.6	0.61	0.15	0.51	0.95	0.79	0.45	0.46	0.44	0.09	0.1	0	-0.35	-0.34	0.79	0.114	0.236	0.003	0.233	0.781	0.251	0.397	0.758	0.35	0.347	0.355	0.016	0.015	0.005	0.267	0.263	0.781	intronic	TCF7L2	.
10	113025519	rs4309084	G	A	0.63	0.95	0.6	0.61	0.15	0.51	0.95	0.79	0.45	0.46	0.44	0.09	0.1	0	-0.35	-0.34	0.79	0.115	0.236	0.003	0.237	0.781	0.251	0.397	0.758	0.35	0.34	0.355	0.016	0.013	0.005	0.267	0.267	0.781	intronic	TCF7L2	.
10	113002478	rs6585198	A	G	0.63	0.94	0.6	0.63	0.15	0.53	0.95	0.79	0.45	0.47	0.41	0.07	0.1	-0.01	-0.35	-0.33	0.79	0.101	0.22	0.003	0.2	0.781	0.267	0.381	0.742	0.346	0.363	0.317	0.009	0.015	0.002	0.27	0.248	0.781	intronic	TCF7L2	.
10	113005412	rs6585199	A	G	0.63	0.95	0.6	0.63	0.15	0.53	0.95	0.79	0.45	0.48	0.42	0.07	0.1	0	-0.35	-0.32	0.79	0.11	0.236	0.003	0.219	0.781	0.267	0.381	0.758	0.35	0.363	0.339	0.01	0.015	0.005	0.267	0.248	0.781	intronic	TCF7L2	.
10	113048313	rs10885409	C	T	0.64	0.94	0.61	0.62	0.17	0.52	0.96	0.77	0.44	0.45	0.42	0.09	0.1	-0.02	-0.35	-0.35	0.77	0.107	0.22	0.003	0.221	0.778	0.242	0.404	0.732	0.339	0.33	0.333	0.015	0.012	0.001	0.276	0.276	0.778	intronic	TCF7L2	.
21	34862750	rs1003574	G	T	0.63	0.88	0.66	0.62	0.09	0.46	0.86	0.79	0.57	0.53	0.42	0.2	0.16	0.01	-0.2	-0.24	0.79	0.068	0.126	0.001	0.155	0.747	0.29	0.307	0.776	0.481	0.439	0.325	0.068	0.045	0.004	0.107	0.135	0.776	intronic	RUNX1	.
21	34899051	rs7283301	C	T	0.67	0.73	0.63	0.68	0.07	0.6	0.86	0.67	0.56	0.61	0.14	0.04	0.09	-0.13	-0.23	-0.18	0.67	0.007	0.022	0.002	0.003	0.776	0.48	0.164	0.659	0.491	0.544	0.039	0.002	0.012	0.045	0.125	0.083	0.776	intronic	RUNX1	.
17	33856629	rs183411	A	G	0.48	0.82	0.46	0.41	0.05	0.34	0.65	0.77	0.41	0.36	0.48	0.12	0.07	0.17	-0.19	-0.24	0.77	0.139	0.211	0.009	0.292	0.57	0.243	0.168	0.774	0.357	0.273	0.369	0.032	0.003	0.064	0.055	0.113	0.774	intronic	ASIC2	.
21	34830478	rs2226303	C	T	0.89	0.98	0.89	0.83	0.23	0.82	1	0.75	0.66	0.6	0.16	0.07	0.01	-0.02	-0.11	-0.17	0.75	0.037	0.051	0.007	0.09	0.768	0.516	0.181	0.711	0.616	0.541	0.114	0.013	0.004	0.02	0.097	0.139	0.768	intronic	RUNX1	.
3	7645327	rs3792443	T	C	0.55	0.79	0.54	0.52	0.09	0.41	0.88	0.7	0.45	0.43	0.37	0.13	0.11	-0.09	-0.34	-0.36	0.7	0.063	0.131	0.003	0.127	0.764	0.241	0.381	0.673	0.34	0.34	0.245	0.02	0.022	0.025	0.245	0.238	0.764	intronic	GRM7	.
21	34895121	rs8130963	G	A	0.69	0.83	0.63	0.69	0.08	0.6	0.86	0.74	0.55	0.61	0.22	0.03	0.09	-0.04	-0.23	-0.17	0.74	0.028	0.073	0.003	0.039	0.759	0.462	0.159	0.717	0.472	0.529	0.098	0.002	0.011	0.003	0.125	0.081	0.759	intronic	RUNX1	.
6	33686811	rs2395450	C	T	0.73	0.66	0.76	0.72	0.11	0.45	0.89	0.55	0.65	0.61	0.2	0.31	0.26	-0.23	-0.13	-0.17	0.65	0.005	0.014	0.003	0.001	0.758	0.261	0.35	0.519	0.59	0.524	0.083	0.175	0.121	0.134	0.051	0.089	0.758	intronic	ITPR3	.
10	113023574	rs7921525	T	C	0.64	0.95	0.63	0.61	0.19	0.51	0.97	0.75	0.44	0.42	0.44	0.12	0.1	-0.02	-0.33	-0.36	0.75	0.109	0.207	0.001	0.236	0.754	0.194	0.424	0.706	0.331	0.289	0.355	0.031	0.014	0	0.26	0.29	0.754	intronic	TCF7L2	.
6	33680913	rs4713655	T	C	0.73	0.66	0.77	0.7	0.11	0.45	0.88	0.55	0.66	0.6	0.2	0.31	0.25	-0.22	-0.12	-0.18	0.66	0.008	0.017	0.009	0.003	0.752	0.261	0.343	0.519	0.598	0.51	0.083	0.184	0.109	0.127	0.042	0.093	0.752	intronic	ITPR3	.
3	7011993	rs1532541	T	A	0.98	0.98	0.98	0.99	0.26	0.99	0.96	0.72	0.72	0.72	-0.01	-0.01	0	0.03	0.02	0.03	0.72	0.002	0.005	0	0.003	0.665	0.712	0.016	0.669	0.723	0.751	0.002	0.001	0.004	0.002	0.002	0.016	0.751	intronic	GRM7	.
9	6611333	rs6477098	A	G	0.89	0.86	0.91	0.91	0.14	0.8	0.8	0.71	0.77	0.76	0.05	0.11	0.1	0.06	0.12	0.11	0.77	0.003	0.012	0.002	0.006	0.598	0.607	0.005	0.667	0.747	0.732	0.002	0.045	0.034	0.004	0.049	0.038	0.747	intronic	GLDC	.
17	3581696	rs224523	T	C	0.59	0.67	0.59	0.57	0.02	0.49	0.77	0.65	0.57	0.55	0.18	0.1	0.08	-0.1	-0.18	-0.2	0.65	0.009	0.015	0.002	0.024	0.742	0.46	0.148	0.7	0.528	0.496	0.072	0.017	0.008	0.008	0.062	0.078	0.742	intronic	TRPV1	.
6	33685671	rs749338	C	T	0.7	0.64	0.73	0.68	0.11	0.44	0.87	0.53	0.63	0.58	0.19	0.29	0.24	-0.24	-0.14	-0.19	0.63	0.004	0.012	0.004	0.003	0.74	0.251	0.339	0.495	0.56	0.493	0.074	0.158	0.104	0.134	0.054	0.094	0.74	exonic	ITPR3	synonymous
7	127227234	rs2106149	T	C	0.55	0.7	0.52	0.53	0	0.53	0.71	0.69	0.51	0.53	0.17	-0.01	0	-0.01	-0.19	-0.18	0.69	0.028	0.069	0.003	0.054	0.705	0.53	0.061	0.74	0.465	0.479	0.056	0.003	0.004	0.007	0.074	0.059	0.74	intronic	GRM8	.
7	127227851	rs2237808	G	A	0.56	0.7	0.52	0.54	0	0.53	0.71	0.69	0.51	0.53	0.17	-0.01	0.01	-0.01	-0.19	-0.17	0.69	0.028	0.069	0.002	0.05	0.705	0.525	0.064	0.74	0.465	0.484	0.059	0.004	0.004	0.007	0.074	0.055	0.74	intronic	GRM8	.
3	7205058	rs1516303	T	G	0.74	0.83	0.72	0.72	0.07	0.71	0.83	0.76	0.65	0.64	0.12	0.01	0	0	-0.12	-0.12	0.76	0.009	0.019	0.003	0.025	0.738	0.601	0.038	0.731	0.591	0.569	0.023	0.004	0.004	0.005	0.031	0.039	0.738	intronic	GRM7	.
9	6603366	rs7872165	C	G	0.87	0.99	0.88	0.85	0.26	0.74	1	0.73	0.62	0.59	0.25	0.14	0.11	-0.01	-0.12	-0.15	0.73	0.044	0.078	0.003	0.109	0.735	0.376	0.258	0.692	0.568	0.508	0.211	0.056	0.023	0.003	0.103	0.136	0.735	intronic	GLDC	.
7	127223262	rs6960871	T	C	0.58	0.83	0.53	0.54	0.11	0.53	0.87	0.73	0.43	0.43	0.3	0	0.01	-0.04	-0.33	-0.33	0.73	0.086	0.181	0.003	0.17	0.735	0.345	0.238	0.705	0.322	0.331	0.186	0.004	0.004	0.002	0.228	0.215	0.735	intronic	GRM8	.
7	127148888	rs2402855	T	G	0.4	0.76	0.34	0.38	0.04	0.29	0.65	0.72	0.29	0.33	0.46	0.04	0.08	0.11	-0.31	-0.27	0.72	0.156	0.295	0.003	0.274	0.578	0.204	0.218	0.734	0.236	0.247	0.362	0.002	0.006	0.029	0.163	0.146	0.734	intronic	GRM8	.
17	3596159	rs10491215	C	G	1	1	0.99	1	0.3	1	0.98	0.7	0.69	0.7	0	-0.01	0	0.02	0.02	0.02	0.7	0.001	0.002	0.001	0.003	0.655	0.689	0.019	0.656	0.712	0.734	0	0.004	0.002	0.015	0.002	0.016	0.734	intronic	TRPV1	.
17	3596752	rs7211517	G	C	1	1	0.99	1	0.3	1	0.98	0.7	0.69	0.7	0	-0.01	0	0.02	0.02	0.02	0.7	0.001	0.002	0.001	0.003	0.655	0.689	0.019	0.656	0.712	0.734	0	0.004	0.002	0.015	0.002	0.016	0.734	intronic	TRPV1	.
17	3596281	rs73303323	C	T	1	1	0.99	1	0.3	1	0.98	0.7	0.69	0.7	0	-0.01	0	0.02	0.02	0.02	0.7	0.001	0.002	0.001	0.003	0.655	0.689	0.019	0.656	0.712	0.734	0	0.004	0.002	0.015	0.002	0.016	0.734	intronic	TRPV1	.
17	3595812	rs11870382	G	A	1	1	0.99	1	0.3	1	0.98	0.7	0.69	0.7	0	-0.01	0	0.02	0.02	0.02	0.7	0.001	0.002	0.001	0.003	0.655	0.689	0.019	0.656	0.712	0.734	0	0.004	0.002	0.015	0.002	0.016	0.734	UTR5	TRPV1	.
7	127224625	rs4532535	G	T	0.54	0.69	0.51	0.52	0	0.53	0.71	0.68	0.5	0.52	0.16	-0.02	-0.01	-0.02	-0.21	-0.19	0.68	0.031	0.073	0.003	0.057	0.709	0.53	0.064	0.733	0.451	0.466	0.051	0.002	0.004	0.006	0.088	0.071	0.733	intronic	GRM8	.
17	3594287	rs10438718	A	G	1	1	0.99	1	0.3	1	0.98	0.7	0.69	0.7	0	-0.01	0	0.02	0.02	0.02	0.7	0.001	0.003	0.001	0.003	0.655	0.689	0.019	0.656	0.711	0.733	0	0.005	0.002	0.015	0.002	0.015	0.733	intronic	TRPV1	.
17	3594053	rs11869034	G	A	1	1	0.99	1	0.3	1	0.98	0.7	0.69	0.7	0	-0.01	0	0.02	0.02	0.02	0.7	0.001	0.003	0.001	0.003	0.655	0.689	0.019	0.656	0.711	0.733	0	0.005	0.002	0.015	0.002	0.015	0.733	intronic	TRPV1	.
17	3596899	rs7214357	A	G	1	1	0.99	1	0.3	1	0.98	0.7	0.69	0.7	0	-0.01	0	0.02	0.02	0.02	0.7	0.001	0.002	0.001	0.003	0.655	0.689	0.019	0.656	0.712	0.733	0	0.004	0.002	0.015	0.002	0.015	0.733	intronic	TRPV1	.
17	3581800	rs224525	A	G	0.58	0.67	0.56	0.55	0.01	0.49	0.74	0.66	0.56	0.54	0.18	0.07	0.06	-0.08	-0.18	-0.2	0.66	0.013	0.027	0.003	0.034	0.732	0.479	0.122	0.718	0.515	0.493	0.072	0.007	0.003	0	0.062	0.071	0.732	intronic	TRPV1	.
6	33691780	rs2296741	C	T	0.81	0.69	0.83	0.78	0.13	0.47	0.89	0.56	0.69	0.64	0.22	0.36	0.31	-0.2	-0.07	-0.12	0.69	0.012	0.035	0.004	0.008	0.73	0.235	0.341	0.513	0.638	0.571	0.101	0.245	0.18	0.107	0.016	0.045	0.73	intronic	ITPR3	.
6	33691269	rs4711336	G	A	0.81	0.69	0.83	0.78	0.13	0.47	0.89	0.56	0.69	0.64	0.22	0.36	0.31	-0.2	-0.07	-0.12	0.69	0.012	0.035	0.004	0.008	0.73	0.235	0.341	0.513	0.638	0.571	0.101	0.245	0.18	0.107	0.016	0.045	0.73	intronic	ITPR3	.
6	33689469	rs3818521	C	T	0.73	0.65	0.75	0.72	0.11	0.44	0.86	0.55	0.64	0.62	0.21	0.31	0.28	-0.21	-0.11	-0.14	0.64	0.003	0.013	0.001	0.002	0.729	0.251	0.324	0.511	0.577	0.535	0.086	0.173	0.139	0.108	0.037	0.058	0.729	intronic	ITPR3	.
6	33690757	rs10947430	G	A	0.73	0.65	0.75	0.72	0.11	0.44	0.86	0.55	0.64	0.61	0.21	0.3	0.27	-0.21	-0.12	-0.15	0.64	0.003	0.011	0.001	0.001	0.729	0.251	0.324	0.511	0.573	0.532	0.086	0.169	0.136	0.108	0.04	0.06	0.729	intronic	ITPR3	.
6	33689192	rs2296739	G	A	0.72	0.64	0.75	0.72	0.11	0.44	0.86	0.53	0.64	0.61	0.19	0.31	0.28	-0.23	-0.11	-0.14	0.64	0.006	0.018	0.001	0.006	0.729	0.251	0.324	0.495	0.577	0.535	0.075	0.173	0.139	0.121	0.037	0.058	0.729	intronic	ITPR3	.
6	33692918	rs3818524	G	C	0.73	0.65	0.75	0.73	0.11	0.45	0.86	0.55	0.64	0.62	0.2	0.3	0.28	-0.21	-0.12	-0.14	0.64	0.003	0.011	0.002	0.003	0.729	0.256	0.319	0.511	0.573	0.541	0.082	0.164	0.139	0.108	0.039	0.055	0.729	intronic	ITPR3	.
19	9206449	rs7260343	A	G	0.52	0.53	0.51	0.54	0.01	0.74	0.56	0.52	0.49	0.53	-0.21	-0.23	-0.2	-0.03	-0.05	-0.02	0.53	0.004	0.005	0.002	0.004	0.536	0.728	0.067	0.528	0.45	0.467	0.108	0.103	0.083	0.001	0.001	0.003	0.728	intergenic	OR7D2;OR7D4	.
7	127118195	rs1361955	G	C	0.38	0.75	0.34	0.33	0.04	0.26	0.65	0.71	0.29	0.29	0.49	0.07	0.07	0.1	-0.31	-0.31	0.71	0.168	0.287	0.002	0.313	0.578	0.172	0.254	0.727	0.236	0.21	0.392	0.011	0.004	0.025	0.163	0.187	0.727	intronic	GRM8	.
7	127125534	rs2106183	A	T	0.38	0.75	0.34	0.34	0.04	0.26	0.65	0.71	0.3	0.3	0.49	0.07	0.08	0.1	-0.31	-0.31	0.71	0.167	0.286	0.002	0.31	0.578	0.172	0.254	0.727	0.237	0.212	0.392	0.012	0.005	0.025	0.162	0.184	0.727	intronic	GRM8	.
10	112984694	rs4297396	T	G	0.3	0.61	0.33	0.26	0.02	0.24	0.76	0.58	0.31	0.24	0.36	0.09	0.02	-0.15	-0.42	-0.5	0.58	0.111	0.15	0.01	0.238	0.726	0.19	0.416	0.622	0.255	0.181	0.253	0.015	0.003	0.039	0.302	0.396	0.726	intronic	TCF7L2	.
10	112975762	rs72826065	G	A	0.3	0.61	0.33	0.26	0.02	0.24	0.76	0.59	0.3	0.23	0.37	0.08	0.01	-0.14	-0.43	-0.5	0.59	0.121	0.164	0.01	0.254	0.726	0.19	0.416	0.629	0.249	0.175	0.261	0.012	0.004	0.035	0.31	0.405	0.726	intronic	TCF7L2	.
10	112976711	rs7918749	G	A	0.29	0.6	0.32	0.25	0.02	0.24	0.76	0.58	0.3	0.22	0.36	0.08	0	-0.16	-0.43	-0.51	0.58	0.12	0.152	0.015	0.256	0.726	0.19	0.416	0.615	0.248	0.163	0.245	0.012	0.004	0.043	0.312	0.422	0.726	intronic	TCF7L2	.
1	248603295	rs28812845	A	G	0.99	1	1	0.99	0.3	1	1	0.7	0.7	0.69	0	0	-0.01	0	0	-0.01	0.7	0.002	0	0.003	0	0.692	0.687	0	0.652	0.725	0.723	0	0	0.001	0	0	0.001	0.725	intergenic	OR2T10;OR2T11	.
7	127195903	rs1361956	G	A	0.4	0.77	0.35	0.36	0.05	0.24	0.67	0.72	0.3	0.31	0.54	0.11	0.13	0.1	-0.32	-0.31	0.72	0.161	0.285	0.003	0.298	0.594	0.13	0.319	0.725	0.234	0.219	0.444	0.03	0.024	0.018	0.177	0.189	0.725	intronic	GRM8	.
9	6567464	rs6477091	A	T	0.48	0.84	0.41	0.48	0.09	0.32	0.76	0.75	0.32	0.4	0.52	0.09	0.16	0.08	-0.35	-0.27	0.75	0.137	0.293	0.006	0.217	0.63	0.155	0.316	0.724	0.228	0.296	0.406	0.012	0.046	0.01	0.212	0.142	0.724	intronic	GLDC	.
6	33699422	rs4711339	A	G	0.76	0.67	0.8	0.74	0.12	0.46	0.87	0.55	0.68	0.62	0.21	0.34	0.28	-0.2	-0.08	-0.14	0.68	0.008	0.022	0.007	0.001	0.723	0.245	0.322	0.519	0.615	0.537	0.097	0.213	0.142	0.095	0.019	0.055	0.723	intronic	C6orf125	.
6	33702251	rs4713660	A	G	0.76	0.66	0.8	0.74	0.12	0.46	0.87	0.54	0.68	0.62	0.2	0.34	0.28	-0.21	-0.08	-0.13	0.68	0.011	0.03	0.006	0.003	0.723	0.245	0.322	0.503	0.615	0.539	0.085	0.213	0.144	0.108	0.019	0.054	0.723	intronic	C6orf125	.
6	33701800	rs6938056	C	T	0.76	0.65	0.8	0.73	0.12	0.46	0.87	0.53	0.68	0.61	0.19	0.34	0.27	-0.22	-0.08	-0.14	0.68	0.013	0.034	0.008	0.003	0.723	0.245	0.322	0.495	0.615	0.531	0.079	0.213	0.137	0.114	0.019	0.059	0.723	intronic	C6orf125	.
6	33706379	rs7770465	G	C	0.76	0.67	0.79	0.74	0.12	0.46	0.87	0.55	0.67	0.62	0.21	0.33	0.28	-0.21	-0.08	-0.14	0.67	0.009	0.024	0.006	0.001	0.723	0.245	0.322	0.511	0.61	0.535	0.091	0.209	0.14	0.101	0.021	0.057	0.723	intronic	C6orf125	.
6	33689073	rs2296738	C	T	0.77	0.65	0.78	0.76	0.13	0.46	0.88	0.52	0.65	0.63	0.19	0.32	0.3	-0.23	-0.1	-0.12	0.65	0.011	0.031	0.002	0.018	0.723	0.236	0.331	0.472	0.59	0.557	0.07	0.194	0.166	0.134	0.031	0.047	0.723	intronic	ITPR3	.
6	33693258	rs3818527	G	A	0.76	0.67	0.79	0.74	0.12	0.46	0.87	0.55	0.67	0.62	0.21	0.33	0.28	-0.21	-0.08	-0.13	0.67	0.008	0.024	0.005	0.002	0.723	0.245	0.322	0.511	0.61	0.541	0.091	0.209	0.145	0.101	0.021	0.053	0.723	intronic	ITPR3	.
10	112986821	rs4073980	G	C	0.63	0.94	0.61	0.62	0.21	0.52	0.96	0.73	0.4	0.41	0.42	0.09	0.1	-0.02	-0.35	-0.33	0.73	0.1	0.21	0.003	0.206	0.721	0.181	0.395	0.667	0.28	0.278	0.322	0.015	0.015	0.001	0.267	0.262	0.721	intronic	TCF7L2	.
7	127098914	rs2299533	C	T	0.36	0.74	0.32	0.33	0.04	0.25	0.62	0.7	0.28	0.29	0.49	0.07	0.09	0.12	-0.3	-0.29	0.7	0.171	0.3	0.003	0.309	0.552	0.157	0.245	0.72	0.219	0.207	0.404	0.011	0.008	0.034	0.157	0.165	0.72	intronic	GRM8	.
7	127096839	rs7808643	C	T	0.36	0.74	0.32	0.33	0.04	0.25	0.62	0.7	0.28	0.29	0.49	0.07	0.09	0.12	-0.3	-0.29	0.7	0.17	0.298	0.003	0.309	0.552	0.157	0.245	0.72	0.22	0.207	0.404	0.012	0.008	0.034	0.156	0.165	0.72	intronic	GRM8	.
14	72400625	rs6574072	C	G	0.74	0.57	0.75	0.79	0.15	0.9	0.47	0.42	0.6	0.64	-0.33	-0.15	-0.11	0.1	0.29	0.32	0.64	0.056	0.09	0.001	0.12	0.21	0.719	0.35	0.319	0.543	0.577	0.269	0.057	0.038	0.01	0.17	0.205	0.719	intronic	RGS6	.
7	127179290	rs10238740	A	C	0.4	0.77	0.35	0.36	0.06	0.24	0.67	0.72	0.3	0.3	0.54	0.11	0.12	0.1	-0.32	-0.32	0.72	0.163	0.285	0.003	0.304	0.587	0.122	0.319	0.718	0.227	0.207	0.444	0.03	0.022	0.018	0.177	0.195	0.718	intronic	GRM8	.
6	33697224	rs749847	G	C	0.77	0.67	0.8	0.74	0.13	0.46	0.87	0.54	0.67	0.62	0.21	0.34	0.28	-0.21	-0.08	-0.13	0.67	0.009	0.026	0.006	0.002	0.717	0.238	0.322	0.504	0.609	0.535	0.091	0.213	0.145	0.101	0.019	0.053	0.717	downstream	C6orf125,ITPR3	.
6	33706421	rs4713664	A	G	0.72	0.65	0.76	0.72	0.12	0.45	0.86	0.54	0.65	0.6	0.2	0.31	0.27	-0.21	-0.1	-0.15	0.65	0.005	0.016	0.002	0.001	0.717	0.241	0.319	0.495	0.573	0.517	0.082	0.176	0.13	0.108	0.033	0.061	0.717	intronic	C6orf125	.
6	33706054	rs6457739	A	G	0.73	0.64	0.77	0.72	0.12	0.45	0.86	0.53	0.65	0.6	0.19	0.32	0.27	-0.22	-0.1	-0.15	0.65	0.009	0.024	0.004	0.002	0.717	0.241	0.319	0.487	0.586	0.516	0.076	0.189	0.128	0.115	0.027	0.062	0.717	intronic	C6orf125	.
6	33705021	rs9366828	G	A	0.73	0.65	0.78	0.72	0.12	0.45	0.86	0.54	0.66	0.6	0.2	0.33	0.27	-0.21	-0.09	-0.14	0.66	0.012	0.033	0.005	0.006	0.717	0.241	0.319	0.479	0.595	0.521	0.071	0.197	0.133	0.121	0.024	0.059	0.717	intronic	C6orf125	.
9	6566602	rs7039182	A	C	0.52	0.83	0.45	0.53	0.09	0.33	0.75	0.75	0.36	0.45	0.51	0.12	0.2	0.08	-0.3	-0.22	0.75	0.107	0.24	0.009	0.16	0.624	0.16	0.304	0.717	0.27	0.35	0.39	0.027	0.076	0.009	0.165	0.094	0.717	intronic	GLDC	.
6	33693445	rs3818530	C	G	0.73	0.65	0.76	0.71	0.12	0.45	0.86	0.54	0.65	0.6	0.2	0.31	0.26	-0.21	-0.1	-0.15	0.65	0.006	0.017	0.004	0	0.717	0.241	0.319	0.495	0.577	0.51	0.082	0.18	0.123	0.108	0.031	0.066	0.717	intronic	ITPR3	.
6	33690533	rs764754	C	T	0.82	0.8	0.82	0.78	0.15	0.47	0.89	0.65	0.68	0.63	0.33	0.35	0.31	-0.1	-0.07	-0.11	0.68	0	0.004	0.003	0.002	0.713	0.215	0.341	0.605	0.619	0.558	0.204	0.243	0.184	0.028	0.016	0.043	0.713	intronic	ITPR3	.
6	33694518	rs3227	G	C	0.76	0.66	0.79	0.75	0.13	0.46	0.87	0.53	0.66	0.62	0.2	0.33	0.29	-0.21	-0.08	-0.13	0.66	0.009	0.027	0.003	0.005	0.712	0.231	0.322	0.488	0.597	0.535	0.085	0.207	0.151	0.108	0.022	0.05	0.712	intronic	ITPR3	.
17	3581747	rs224524	C	T	0.57	0.64	0.56	0.54	0.01	0.49	0.72	0.63	0.56	0.53	0.15	0.07	0.05	-0.08	-0.16	-0.19	0.63	0.01	0.017	0.002	0.027	0.712	0.479	0.103	0.698	0.514	0.482	0.056	0.007	0.001	0.001	0.048	0.063	0.712	intronic	TRPV1	.
14	20234534	rs9707330	T	C	0.47	0.67	0.43	0.47	0.01	0.41	0.68	0.66	0.42	0.46	0.27	0.02	0.06	-0.01	-0.26	-0.21	0.66	0.051	0.121	0.003	0.074	0.672	0.396	0.138	0.711	0.372	0.421	0.134	0.004	0.006	0.007	0.124	0.077	0.711	intergenic	OR11H6(dist=9832),OR11H4(dist=8258)	.
6	33706420	rs4713663	G	A	0.72	0.65	0.76	0.72	0.12	0.44	0.86	0.54	0.65	0.6	0.21	0.32	0.27	-0.21	-0.1	-0.14	0.65	0.005	0.016	0.002	0.001	0.711	0.236	0.317	0.495	0.573	0.517	0.086	0.182	0.134	0.102	0.03	0.057	0.711	intronic	C6orf125	.
12	6386956	rs7953404	G	A	0.19	0.73	0.16	0.1	0.42	0.04	0.77	0.31	-0.26	-0.32	0.7	0.13	0.06	-0.03	-0.6	-0.67	0.7	0.392	0.488	0.016	0.608	0.216	0.338	0.711	0.172	0.137	0.241	0.703	0.085	0.029	0.003	0.523	0.63	0.711	intronic	LTBR	.
9	6566669	rs7027507	C	T	0.47	0.83	0.41	0.48	0.09	0.32	0.74	0.74	0.32	0.39	0.5	0.09	0.16	0.08	-0.33	-0.26	0.74	0.127	0.272	0.005	0.204	0.613	0.155	0.297	0.71	0.232	0.293	0.387	0.013	0.044	0.01	0.192	0.131	0.71	intronic	GLDC	.
7	126704521	rs4728049	G	A	0.59	0.89	0.55	0.6	0.13	0.57	0.74	0.76	0.42	0.47	0.32	-0.02	0.03	0.15	-0.18	-0.14	0.76	0.091	0.209	0.004	0.151	0.546	0.353	0.055	0.71	0.305	0.369	0.19	0.003	0.003	0.048	0.075	0.036	0.71	intronic	GRM8	.
17	3616970	rs188833	C	A	0.43	0.6	0.38	0.38	0	0.4	0.71	0.59	0.37	0.37	0.19	-0.03	-0.03	-0.11	-0.33	-0.33	0.59	0.044	0.086	0.003	0.093	0.705	0.401	0.168	0.647	0.343	0.329	0.072	0.004	0.003	0.018	0.184	0.192	0.705	intronic	SHPK	.
12	6353629	rs144297257	A	G	0.68	0.66	0.73	0.6	0.02	0	0	0.64	0.7	0.58	0.66	0.73	0.6	0.66	0.73	0.6	0.73	0.017	0.013	0.029	0.003	0.018	0.018	0	0.65	0.677	0.54	0.686	0.701	0.566	0.691	0.704	0.57	0.704	intronic	SCNN1A	.
7	143225569	rs9918515	G	A	0.73	0.91	0.8	0.68	0.2	0.7	0.93	0.71	0.6	0.48	0.21	0.11	-0.02	-0.02	-0.13	-0.25	0.71	0.061	0.026	0.041	0.12	0.703	0.399	0.165	0.65	0.54	0.366	0.11	0.029	0.004	0	0.058	0.169	0.703	intergenic	TAS2R40;LOC105375545	.
17	3583408	rs224534	G	A	0.44	0.64	0.43	0.37	0.01	0.35	0.71	0.63	0.42	0.36	0.28	0.08	0.01	-0.08	-0.28	-0.35	0.63	0.061	0.079	0.008	0.143	0.702	0.339	0.227	0.678	0.385	0.305	0.154	0.011	0.004	0.003	0.139	0.212	0.702	exonic	TRPV1	nonsynonymous
12	11181033	rs1451766	A	T	0.61	0.69	0.66	0.54	0.05	0.34	0.77	0.64	0.61	0.49	0.35	0.32	0.2	-0.08	-0.11	-0.23	0.64	0.026	0.004	0.03	0.042	0.702	0.243	0.311	0.648	0.565	0.421	0.215	0.19	0.073	0.01	0.021	0.103	0.702	intergenic	SMIM10L1;TAS2R42	.
15	25440615	rs2257252	T	G	0.9	1	0.95	0.84	0.29	0.83	1	0.71	0.65	0.55	0.17	0.11	0.01	0	-0.05	-0.16	0.71	0.057	0.044	0.031	0.107	0.702	0.454	0.165	0.666	0.625	0.494	0.14	0.048	0.004	0	0.052	0.122	0.702	intergenic	UBE3A;ATP10A	.
15	25440319	rs2526025	A	C	0.9	1	0.94	0.85	0.29	0.85	1	0.71	0.65	0.56	0.15	0.09	0	0	-0.06	-0.15	0.71	0.051	0.046	0.024	0.102	0.702	0.482	0.144	0.666	0.62	0.504	0.122	0.028	0.005	0	0.055	0.116	0.702	intergenic	UBE3A;ATP10A	.
17	33373687	rs4795771	T	C	0.46	0.52	0.46	0.43	0.22	0.04	0	0.3	0.24	0.22	0.49	0.43	0.4	0.52	0.46	0.43	0.52	0	0.002	0.003	0.007	0.197	0.131	0.019	0.187	0.116	0.098	0.591	0.393	0.348	0.702	0.463	0.409	0.702	intronic	ASIC2	.
12	11014369	rs7310849	A	G	0.62	0.7	0.66	0.55	0.05	0.32	0.77	0.66	0.61	0.5	0.38	0.34	0.23	-0.06	-0.11	-0.22	0.66	0.023	0.002	0.024	0.043	0.702	0.227	0.329	0.663	0.565	0.436	0.248	0.206	0.096	0.005	0.021	0.092	0.702	intronic	PRH1,PRR4	.
12	11013979	rs1901190	T	C	0.61	0.7	0.66	0.54	0.05	0.33	0.77	0.66	0.61	0.49	0.38	0.33	0.21	-0.06	-0.11	-0.23	0.66	0.028	0.002	0.029	0.049	0.702	0.232	0.322	0.663	0.565	0.423	0.242	0.201	0.083	0.005	0.021	0.1	0.702	intronic	PRH1,PRR4	.
12	11019404	rs12311490	T	C	0.61	0.69	0.66	0.53	0.05	0.32	0.77	0.64	0.61	0.48	0.37	0.33	0.21	-0.08	-0.11	-0.24	0.64	0.026	0.003	0.029	0.043	0.702	0.227	0.329	0.648	0.56	0.416	0.233	0.201	0.082	0.01	0.023	0.105	0.702	intronic	PRH1,PRR4	.
12	10978613	rs2900553	G	T	0.61	0.7	0.66	0.55	0.05	0.32	0.77	0.66	0.61	0.5	0.38	0.34	0.22	-0.06	-0.11	-0.22	0.66	0.023	0.001	0.023	0.043	0.702	0.227	0.329	0.663	0.563	0.434	0.248	0.205	0.095	0.005	0.021	0.092	0.702	intronic	PRH1,PRR4	.
12	11100130	rs35097305	A	C	0.61	0.69	0.66	0.54	0.05	0.32	0.77	0.64	0.61	0.5	0.37	0.33	0.22	-0.08	-0.11	-0.22	0.64	0.02	0.003	0.022	0.036	0.702	0.227	0.329	0.648	0.556	0.43	0.232	0.197	0.092	0.01	0.024	0.095	0.702	intronic	PRH1,PRR4	.
12	10979192	rs7138953	G	A	0.61	0.7	0.66	0.54	0.05	0.32	0.77	0.65	0.61	0.49	0.37	0.33	0.21	-0.07	-0.11	-0.23	0.65	0.025	0.002	0.026	0.044	0.702	0.227	0.329	0.656	0.56	0.423	0.24	0.201	0.087	0.007	0.023	0.1	0.702	intronic	PRH1,PRR4	.
17	3585283	rs161395	C	G	0.44	0.64	0.42	0.37	0.01	0.35	0.71	0.63	0.41	0.36	0.28	0.07	0.02	-0.08	-0.29	-0.34	0.63	0.06	0.084	0.005	0.139	0.702	0.339	0.227	0.678	0.378	0.311	0.154	0.008	0.004	0.003	0.145	0.207	0.702	intronic	TRPV1	.
17	3583908	rs224537	G	A	0.45	0.64	0.44	0.38	0.01	0.35	0.71	0.63	0.43	0.37	0.3	0.09	0.03	-0.07	-0.28	-0.34	0.63	0.061	0.082	0.006	0.141	0.702	0.334	0.232	0.684	0.389	0.314	0.166	0.014	0.003	0.001	0.136	0.203	0.702	intronic	TRPV1	.
12	10989153	rs2418302	C	T	0.61	0.7	0.66	0.54	0.05	0.32	0.77	0.66	0.61	0.49	0.38	0.34	0.21	-0.06	-0.11	-0.23	0.66	0.027	0.001	0.028	0.049	0.702	0.227	0.329	0.663	0.563	0.424	0.248	0.205	0.088	0.005	0.021	0.1	0.702
12	10995061	rs11054140	C	T	0.61	0.7	0.66	0.54	0.05	0.32	0.77	0.66	0.61	0.49	0.38	0.34	0.22	-0.06	-0.11	-0.23	0.66	0.025	0.002	0.026	0.045	0.702	0.227	0.329	0.663	0.565	0.43	0.248	0.206	0.092	0.005	0.021	0.095	0.702
12	10991495	rs12311627	G	A	0.61	0.7	0.66	0.54	0.05	0.32	0.77	0.66	0.61	0.5	0.38	0.34	0.22	-0.06	-0.11	-0.22	0.66	0.025	0.002	0.025	0.045	0.702	0.227	0.329	0.663	0.565	0.431	0.248	0.206	0.093	0.005	0.021	0.095	0.702
10	112988858	rs4074718	A	G	0.64	0.94	0.61	0.62	0.23	0.52	0.96	0.71	0.37	0.39	0.42	0.09	0.1	-0.02	-0.35	-0.33	0.71	0.101	0.213	0.003	0.206	0.701	0.16	0.395	0.644	0.253	0.256	0.322	0.014	0.015	0.001	0.271	0.262	0.701	intronic	TCF7L2	.
10	112988738	rs4074720	T	C	0.64	0.94	0.61	0.63	0.23	0.52	0.96	0.71	0.37	0.39	0.42	0.09	0.11	-0.02	-0.35	-0.33	0.71	0.1	0.213	0.003	0.203	0.701	0.16	0.395	0.644	0.253	0.26	0.322	0.014	0.016	0.001	0.271	0.258	0.701	intronic	TCF7L2	.
10	113127429	rs6585209	C	G	0.5	0.68	0.44	0.5	0.05	0.41	0.77	0.64	0.4	0.46	0.27	0.03	0.09	-0.09	-0.32	-0.26	0.64	0.039	0.097	0.001	0.06	0.701	0.324	0.225	0.641	0.336	0.38	0.13	0.001	0.01	0.011	0.181	0.135	0.701	intronic	TCF7L2	.
1	248599554	rs73134447	G	A	0.99	1	1	0.99	0.33	1	1	0.67	0.67	0.66	0	0	-0.01	0	0	-0.01	0.67	0.002	0	0.003	0.001	0.663	0.659	0	0.621	0.7	0.699	0	0	0.001	0	0	0.001	0.7	intergenic	OR2T10;OR2T11	.
6	33700062	rs4713659	A	G	0.73	0.65	0.77	0.73	0.13	0.45	0.86	0.52	0.64	0.6	0.2	0.32	0.28	-0.21	-0.09	-0.14	0.64	0.007	0.022	0.003	0.003	0.7	0.221	0.319	0.472	0.571	0.509	0.082	0.191	0.138	0.108	0.026	0.056	0.7	intronic	C6orf125	.
3	7200058	rs1508724	A	G	0.73	0.84	0.72	0.72	0.11	0.72	0.84	0.73	0.61	0.61	0.12	0	0	0	-0.12	-0.12	0.73	0.011	0.024	0.003	0.029	0.7	0.558	0.038	0.69	0.544	0.526	0.025	0.004	0.004	0.005	0.036	0.042	0.7	intronic	GRM7	.
1	248599203	rs28669343	T	A	0.99	1	1	0.99	0.33	1	1	0.67	0.67	0.66	0	0	-0.01	0	0	-0.01	0.67	0.002	0	0.003	0.001	0.663	0.659	0	0.622	0.699	0.698	0	0	0.001	0	0	0.001	0.699	intergenic	OR2T10;OR2T11	.
1	248599406	rs57225978	C	A	0.99	1	1	0.99	0.33	1	1	0.67	0.67	0.66	0	0	-0.01	0	0	-0.01	0.67	0.007	0	0.009	0.004	0.663	0.659	0	0.621	0.699	0.685	0	0	0.007	0	0	0.007	0.699	intergenic	OR2T10;OR2T11	.
14	20228537	rs35661012	C	A	0.42	0.66	0.37	0.44	0.01	0.4	0.68	0.65	0.36	0.43	0.26	-0.03	0.04	-0.02	-0.31	-0.24	0.65	0.065	0.153	0.008	0.087	0.667	0.391	0.138	0.698	0.324	0.389	0.126	0.003	0	0.006	0.165	0.098	0.698	intergenic	OR11H6(dist=3835),OR11H4(dist=14255)	.
14	20232049	rs78341873	G	A	0.42	0.66	0.38	0.44	0.01	0.4	0.68	0.65	0.37	0.43	0.26	-0.03	0.04	-0.02	-0.3	-0.24	0.65	0.064	0.152	0.008	0.085	0.667	0.391	0.138	0.698	0.324	0.392	0.126	0.003	0.001	0.006	0.164	0.095	0.698	intergenic	OR11H6(dist=7347),OR11H4(dist=10743)	.
17	33377281	rs60894380	C	T	0.27	0.7	0.24	0.23	0.04	0.2	0.76	0.66	0.2	0.19	0.5	0.04	0.03	-0.06	-0.52	-0.53	0.66	0.209	0.348	0.003	0.349	0.698	0.107	0.476	0.65	0.126	0.124	0.39	0.001	0.001	0.008	0.434	0.435	0.698	intronic	ASIC2	.
21	34863442	rs2251826	G	A	0.62	0.77	0.67	0.59	0.08	0.47	0.81	0.69	0.59	0.51	0.3	0.2	0.12	-0.04	-0.14	-0.22	0.69	0.025	0.021	0.007	0.062	0.697	0.316	0.221	0.665	0.506	0.422	0.163	0.068	0.025	0.001	0.05	0.102	0.697	intronic	RUNX1	.
7	127209825	rs2237803	G	A	0.48	0.76	0.43	0.46	0.06	0.38	0.72	0.7	0.38	0.4	0.37	0.05	0.07	0.03	-0.29	-0.27	0.7	0.088	0.186	0.002	0.161	0.64	0.274	0.205	0.696	0.296	0.316	0.236	0	0.005	0.004	0.158	0.134	0.696	intronic	GRM8	.
7	127210544	rs2237805	G	T	0.48	0.76	0.43	0.46	0.06	0.38	0.72	0.7	0.38	0.4	0.37	0.05	0.07	0.03	-0.29	-0.27	0.7	0.088	0.186	0.002	0.161	0.64	0.274	0.205	0.696	0.296	0.316	0.236	0	0.005	0.004	0.158	0.134	0.696	intronic	GRM8	.
10	113127459	rs7906315	G	A	0.49	0.68	0.44	0.5	0.05	0.41	0.76	0.64	0.39	0.45	0.27	0.03	0.08	-0.08	-0.32	-0.27	0.64	0.037	0.091	0	0.059	0.696	0.324	0.219	0.634	0.336	0.373	0.123	0.001	0.008	0.012	0.176	0.135	0.696	intronic	TCF7L2	.
3	7203600	rs1553681	A	C	0.48	0.66	0.49	0.48	0	0.26	0.7	0.65	0.49	0.48	0.4	0.23	0.22	-0.04	-0.21	-0.22	0.65	0.021	0.04	0.003	0.051	0.695	0.256	0.317	0.687	0.452	0.425	0.258	0.104	0.088	0	0.077	0.091	0.695	intronic	GRM7	.
10	113138763	rs290493	G	A	0.32	0.65	0.32	0.25	0.02	0.19	0.73	0.63	0.3	0.23	0.46	0.13	0.06	-0.08	-0.41	-0.48	0.63	0.135	0.191	0.008	0.278	0.695	0.133	0.452	0.65	0.245	0.175	0.362	0.041	0.008	0.008	0.281	0.369	0.695	intronic	TCF7L2	.
6	33699828	rs9469566	C	A	0.73	0.65	0.77	0.73	0.13	0.45	0.86	0.52	0.63	0.59	0.2	0.32	0.28	-0.21	-0.1	-0.14	0.63	0.006	0.019	0.001	0.003	0.694	0.214	0.319	0.464	0.558	0.503	0.082	0.185	0.138	0.108	0.029	0.056	0.694	intronic	C6orf125	.
3	7099821	rs9846279	A	G	1	1	1	1	0.34	0.99	0.89	0.66	0.66	0.66	0.01	0.01	0.01	0.11	0.11	0.11	0.66	0	0	0	0	0.481	0.638	0.087	0.592	0.689	0.693	0.003	0.002	0.002	0.078	0.121	0.123	0.693	intronic	GRM7	.
14	72366064	rs769148	C	T	0.53	0.81	0.46	0.54	0.21	0.76	0.93	0.6	0.25	0.34	0.05	-0.3	-0.22	-0.12	-0.47	-0.39	0.6	0.1	0.228	0.013	0.14	0.693	0.468	0.102	0.527	0.116	0.199	0.001	0.18	0.098	0.064	0.404	0.304	0.693	intronic	RGS6	.
14	72356245	rs2681760	A	G	0.55	0.81	0.47	0.59	0.21	0.78	0.93	0.6	0.26	0.38	0.03	-0.31	-0.19	-0.12	-0.46	-0.34	0.6	0.089	0.205	0.027	0.094	0.693	0.494	0.083	0.518	0.128	0.249	0.005	0.188	0.079	0.07	0.388	0.256	0.693	intronic	RGS6	.
14	72363996	rs847329	A	G	0.55	0.83	0.48	0.59	0.21	0.76	0.93	0.62	0.27	0.38	0.07	-0.29	-0.18	-0.1	-0.46	-0.35	0.62	0.095	0.219	0.024	0.109	0.693	0.468	0.102	0.539	0.133	0.251	0.004	0.161	0.063	0.056	0.386	0.261	0.693	intronic	RGS6	.
15	40289342	rs936212	T	C	0.14	0.67	0.13	0.11	0	0	0.68	0.67	0.13	0.11	0.67	0.13	0.11	-0.02	-0.56	-0.57	0.67	0.343	0.472	0.002	0.504	0.688	0	0.679	0.691	0.105	0.09	0.679	0.102	0.087	0.001	0.506	0.534	0.691	exonic	PLCB2	nonsynonymous
1	167842623	rs204266	A	G	0.59	0.7	0.61	0.61	0.09	0.68	0.81	0.61	0.52	0.52	0.02	-0.07	-0.07	-0.11	-0.2	-0.2	0.61	0.004	0.014	0.003	0.009	0.691	0.54	0.041	0.582	0.433	0.447	0.005	0.008	0.004	0.029	0.092	0.08	0.691	intronic	ADCY10	.
7	80478116	rs7780776	G	A	0.86	0.86	0.87	0.84	0.13	0.85	0.85	0.72	0.73	0.71	0.01	0.02	0	0	0.01	-0.01	0.73	0.004	0.005	0.003	0.005	0.682	0.675	0.005	0.688	0.691	0.676	0.005	0.003	0.004	0.006	0.004	0.004	0.691	intronic	GNAT3	.
3	10295665	rs2578476	C	T	0.62	0.9	0.66	0.57	0.22	0.36	0.94	0.68	0.44	0.34	0.54	0.3	0.2	-0.04	-0.28	-0.38	0.68	0.101	0.137	0.017	0.226	0.69	0.043	0.54	0.621	0.315	0.202	0.454	0.156	0.068	0.005	0.204	0.299	0.69	intergenic	GHRLOS(dist=2216),SEC13(dist=5266)	.
1	248600423	rs1938132	C	T	1	1	1	0.99	0.34	1	1	0.66	0.66	0.66	0	0	-0.01	0	0	-0.01	0.66	0.002	0	0.003	0.001	0.654	0.65	0	0.611	0.69	0.689	0	0	0.001	0	0	0.001	0.69	intergenic	OR2T10;OR2T11	.
17	34017365	rs7222177	T	C	0.93	0.93	0.89	0.97	0.29	0.98	0.96	0.64	0.6	0.68	-0.05	-0.09	-0.01	-0.03	-0.07	0.01	0.68	0.024	0.003	0.04	0.025	0.642	0.675	0.006	0.553	0.558	0.69	0.05	0.058	0.002	0.014	0.027	0.003	0.69	intronic	ASIC2	.
17	34016489	rs8073673	A	C	0.93	0.92	0.89	0.97	0.29	0.98	0.96	0.63	0.6	0.68	-0.07	-0.09	-0.01	-0.04	-0.07	0.01	0.68	0.025	0.005	0.04	0.039	0.642	0.675	0.006	0.535	0.558	0.69	0.065	0.058	0.002	0.024	0.027	0.003	0.69	intronic	ASIC2	.
14	20239242	rs34725918	A	G	0.45	0.66	0.41	0.45	0.01	0.4	0.67	0.65	0.4	0.44	0.26	0.01	0.05	-0.02	-0.27	-0.22	0.65	0.052	0.123	0.002	0.08	0.655	0.381	0.133	0.689	0.346	0.391	0.126	0.004	0.002	0.007	0.129	0.086	0.689	intergenic	OR11H6(dist=14540),OR11H4(dist=3550)	.
17	34041245	rs9907226	T	C	0.64	0.73	0.65	0.64	0.06	0.69	0.57	0.68	0.6	0.58	0.05	-0.04	-0.05	0.16	0.08	0.06	0.68	0.009	0.02	0.003	0.025	0.475	0.603	0.023	0.689	0.523	0.506	0.003	0	0.003	0.058	0.005	0.003	0.689	intronic	ASIC2	.
17	33371409	rs1394393	A	G	0.27	0.75	0.24	0.23	0.06	0.2	0.77	0.69	0.19	0.17	0.55	0.04	0.03	-0.02	-0.52	-0.54	0.69	0.248	0.398	0.003	0.409	0.688	0.089	0.481	0.675	0.11	0.102	0.441	0.001	0.002	0.003	0.439	0.449	0.688	intronic	ASIC2	.
7	127024098	rs978874	T	C	0.48	0.75	0.49	0.43	0.06	0.28	0.67	0.69	0.43	0.37	0.47	0.21	0.16	0.08	-0.18	-0.24	0.69	0.089	0.125	0.009	0.2	0.572	0.147	0.269	0.688	0.356	0.27	0.373	0.093	0.04	0.012	0.057	0.117	0.688	intronic	GRM8	.
21	34885728	rs2300401	C	T	0.67	0.75	0.62	0.68	0.12	0.61	0.84	0.63	0.5	0.56	0.14	0.01	0.07	-0.09	-0.22	-0.17	0.63	0.012	0.032	0.004	0.007	0.688	0.414	0.126	0.583	0.404	0.47	0.035	0.004	0.005	0.025	0.115	0.068	0.688	intronic	RUNX1	.
15	40284286	rs4257181	C	T	0.14	0.67	0.11	0.11	0.02	0	0.67	0.65	0.1	0.09	0.67	0.11	0.11	-0.01	-0.56	-0.57	0.67	0.364	0.498	0.003	0.52	0.647	0.013	0.669	0.66	0.061	0.052	0.686	0.094	0.083	0.004	0.51	0.53	0.686	intergenic	ANKRD63;PLCB2	.
3	7198988	rs6768750	G	A	0.48	0.64	0.49	0.47	0	0.25	0.69	0.64	0.49	0.47	0.39	0.24	0.22	-0.05	-0.2	-0.22	0.64	0.019	0.032	0.002	0.048	0.686	0.245	0.318	0.674	0.452	0.416	0.255	0.113	0.09	0.001	0.07	0.091	0.686	intronic	GRM7	.
14	72354760	rs2681758	C	T	0.55	0.81	0.46	0.59	0.21	0.78	0.93	0.6	0.25	0.38	0.03	-0.32	-0.2	-0.12	-0.47	-0.34	0.6	0.092	0.212	0.029	0.096	0.686	0.494	0.077	0.518	0.122	0.246	0.005	0.195	0.082	0.063	0.389	0.252	0.686	intronic	RGS6	.
1	167841135	rs204267	T	G	0.6	0.7	0.61	0.61	0.09	0.68	0.81	0.61	0.53	0.52	0.02	-0.06	-0.06	-0.11	-0.19	-0.19	0.61	0.003	0.011	0.003	0.007	0.685	0.54	0.038	0.582	0.442	0.453	0.005	0.006	0.002	0.026	0.082	0.072	0.685	intronic	ADCY10	.
17	34024395	rs28379674	T	C	0.93	0.93	0.9	0.97	0.3	0.98	0.97	0.64	0.61	0.67	-0.05	-0.08	-0.01	-0.03	-0.06	0	0.67	0.02	0.004	0.034	0.025	0.644	0.67	0.002	0.548	0.564	0.685	0.05	0.052	0.002	0.019	0.027	0.004	0.685	intronic	ASIC2	.
7	127142258	rs2299540	A	G	0.39	0.7	0.34	0.37	0.04	0.3	0.64	0.66	0.3	0.33	0.41	0.04	0.07	0.07	-0.3	-0.27	0.66	0.122	0.233	0.003	0.223	0.568	0.209	0.202	0.685	0.24	0.243	0.295	0.002	0.004	0.01	0.149	0.141	0.685	intronic	GRM8	.
10	113132709	rs10787475	C	T	0.48	0.68	0.44	0.47	0.05	0.39	0.75	0.64	0.39	0.43	0.29	0.05	0.08	-0.07	-0.32	-0.28	0.64	0.041	0.094	0.003	0.077	0.685	0.297	0.234	0.634	0.332	0.346	0.147	0.003	0.009	0.008	0.169	0.148	0.685	intronic	TCF7L2	.
14	72365349	rs847325	A	C	0.53	0.81	0.45	0.54	0.22	0.76	0.93	0.59	0.24	0.33	0.05	-0.31	-0.22	-0.12	-0.48	-0.39	0.59	0.097	0.223	0.015	0.13	0.682	0.456	0.102	0.506	0.104	0.191	0.001	0.183	0.096	0.07	0.408	0.301	0.682	intronic	RGS6	.
14	20222603	rs945462	C	A	0.44	0.66	0.4	0.45	0.02	0.4	0.67	0.64	0.38	0.43	0.26	-0.01	0.04	-0.02	-0.28	-0.23	0.64	0.056	0.133	0.003	0.085	0.647	0.371	0.133	0.68	0.328	0.376	0.126	0.004	0.001	0.007	0.14	0.091	0.68	intergenic	OR11G2(dist=24230),OR11H6(dist=1107)	.
17	3586220	rs161393	T	C	0.44	0.64	0.42	0.37	0.02	0.35	0.71	0.61	0.4	0.35	0.28	0.07	0.02	-0.08	-0.29	-0.34	0.61	0.06	0.087	0.003	0.138	0.68	0.307	0.227	0.65	0.35	0.287	0.154	0.007	0.004	0.003	0.148	0.206	0.68	intronic	TRPV1	.
5	1411141	rs2550936	C	A	0.78	0.92	0.78	0.79	0.2	0.73	0.88	0.72	0.58	0.58	0.19	0.05	0.05	0.05	-0.09	-0.09	0.72	0.03	0.075	0.003	0.063	0.626	0.437	0.062	0.679	0.488	0.509	0.116	0	0.005	0.009	0.032	0.023	0.679	intronic	SLC6A3	.
17	33378396	rs1394391	G	T	0.27	0.68	0.24	0.23	0.06	0.2	0.76	0.63	0.18	0.17	0.48	0.04	0.03	-0.08	-0.52	-0.53	0.63	0.201	0.337	0.003	0.336	0.677	0.084	0.476	0.61	0.102	0.102	0.373	0.002	0.001	0.014	0.439	0.437	0.677	intronic	ASIC2	.
12	88080048	rs2468246	A	G	0.9	0.93	0.87	0.89	0.3	0.95	0.99	0.63	0.57	0.59	-0.02	-0.08	-0.06	-0.06	-0.12	-0.1	0.63	0.001	0.008	0.003	0.003	0.677	0.611	0.024	0.561	0.524	0.549	0.002	0.025	0.016	0.048	0.082	0.068	0.677	intronic	CEP290	.
17	33848874	rs317394	C	T	0.39	0.66	0.39	0.37	0.01	0.34	0.63	0.65	0.37	0.36	0.32	0.05	0.04	0.03	-0.24	-0.26	0.65	0.068	0.135	0.003	0.133	0.61	0.312	0.154	0.676	0.319	0.316	0.178	0.001	0	0.005	0.114	0.112	0.676	intronic	ASIC2	.
17	34045474	rs9912193	C	A	0.63	0.71	0.65	0.62	0.05	0.66	0.54	0.66	0.59	0.57	0.05	-0.02	-0.04	0.17	0.11	0.08	0.66	0.007	0.013	0.002	0.022	0.446	0.583	0.026	0.676	0.524	0.494	0.004	0.003	0.001	0.065	0.014	0.007	0.676	intronic	ASIC2	.
12	10997170	rs10845281	T	C	0.63	0.7	0.68	0.58	0.06	0.33	0.77	0.63	0.61	0.51	0.36	0.34	0.24	-0.07	-0.09	-0.19	0.63	0.014	0.004	0.017	0.021	0.674	0.203	0.316	0.622	0.558	0.443	0.229	0.215	0.116	0.007	0.014	0.067	0.674	exonic	TAS2R20	nonsynonymous
12	10997112	rs10845279	C	A	0.63	0.7	0.68	0.57	0.06	0.34	0.77	0.64	0.61	0.5	0.37	0.34	0.23	-0.06	-0.09	-0.2	0.64	0.019	0.004	0.023	0.031	0.674	0.208	0.31	0.63	0.558	0.428	0.231	0.209	0.1	0.005	0.014	0.076	0.674	exonic	TAS2R20	nonsynonymous
12	10997615	rs11054142	G	A	0.63	0.7	0.67	0.58	0.06	0.33	0.77	0.64	0.61	0.51	0.37	0.34	0.24	-0.06	-0.1	-0.19	0.64	0.015	0.003	0.016	0.026	0.674	0.203	0.316	0.63	0.553	0.44	0.237	0.209	0.113	0.005	0.015	0.069	0.674	exonic	TAS2R20	synonymous
12	11001153	rs10772409	C	T	0.63	0.69	0.66	0.56	0.06	0.33	0.77	0.62	0.6	0.5	0.36	0.33	0.23	-0.08	-0.1	-0.2	0.62	0.017	0.004	0.02	0.027	0.674	0.203	0.316	0.615	0.547	0.422	0.221	0.203	0.099	0.01	0.018	0.08	0.674	intronic	PRH1,PRR4	.
12	11013044	rs4553441	T	C	0.63	0.7	0.68	0.58	0.06	0.33	0.77	0.63	0.61	0.51	0.36	0.34	0.24	-0.07	-0.09	-0.19	0.63	0.014	0.004	0.017	0.021	0.674	0.203	0.316	0.622	0.558	0.443	0.229	0.215	0.116	0.007	0.014	0.067	0.674	intronic	PRH1,PRR4	.
12	10996933	rs1450839	A	G	0.63	0.7	0.68	0.57	0.06	0.34	0.77	0.64	0.61	0.5	0.37	0.34	0.23	-0.06	-0.09	-0.2	0.64	0.018	0.004	0.021	0.029	0.674	0.208	0.31	0.63	0.558	0.433	0.231	0.209	0.103	0.005	0.014	0.074	0.674	intronic	PRH1,PRR4	.
12	11004521	rs7138834	A	G	0.63	0.7	0.68	0.57	0.06	0.33	0.77	0.64	0.61	0.5	0.37	0.34	0.23	-0.06	-0.09	-0.2	0.64	0.02	0.004	0.024	0.033	0.674	0.203	0.316	0.63	0.558	0.425	0.237	0.215	0.101	0.005	0.014	0.078	0.674	intronic	PRH1,PRR4	.
12	10999601	rs11054145	C	T	0.63	0.7	0.68	0.56	0.06	0.33	0.77	0.64	0.61	0.49	0.37	0.34	0.23	-0.06	-0.09	-0.21	0.64	0.023	0.004	0.027	0.036	0.674	0.203	0.316	0.63	0.558	0.418	0.237	0.215	0.096	0.005	0.014	0.083	0.674	intronic	PRH1,PRR4	.
12	11006913	rs11054152	C	G	0.63	0.7	0.68	0.57	0.06	0.33	0.77	0.64	0.61	0.51	0.37	0.34	0.24	-0.06	-0.09	-0.2	0.64	0.019	0.004	0.022	0.031	0.674	0.203	0.316	0.63	0.558	0.43	0.237	0.215	0.105	0.005	0.014	0.076	0.674	intronic	PRH1,PRR4	.
12	11003524	rs10772413	C	T	0.63	0.7	0.68	0.57	0.06	0.34	0.77	0.64	0.61	0.5	0.37	0.34	0.23	-0.06	-0.09	-0.2	0.64	0.018	0.004	0.021	0.029	0.674	0.208	0.31	0.63	0.558	0.433	0.231	0.209	0.103	0.005	0.014	0.074	0.674	intronic	PRH1,PRR4	.
12	11011921	rs7316390	C	T	0.63	0.7	0.68	0.57	0.06	0.33	0.77	0.64	0.61	0.51	0.37	0.34	0.24	-0.06	-0.09	-0.19	0.64	0.017	0.004	0.021	0.028	0.674	0.203	0.316	0.63	0.56	0.435	0.237	0.217	0.11	0.005	0.013	0.072	0.674	intronic	PRH1,PRR4	.
12	11011729	s7316239	C	T	0.63	0.7	0.68	0.57	0.06	0.33	0.77	0.64	0.61	0.51	0.37	0.34	0.24	-0.06	-0.09	-0.19	0.64	0.017	0.004	0.021	0.028	0.674	0.203	0.316	0.63	0.56	0.435	0.237	0.217	0.11	0.005	0.013	0.072	0.674	intronic	PRH1,PRR4	.
12	11005791	rs10845285	G	A	0.63	0.7	0.68	0.56	0.06	0.33	0.77	0.64	0.61	0.5	0.37	0.34	0.23	-0.06	-0.09	-0.2	0.64	0.02	0.004	0.024	0.032	0.674	0.203	0.316	0.63	0.558	0.426	0.237	0.215	0.102	0.005	0.014	0.078	0.674	intronic	PRH1,PRR4	.
12	10998404	rs7301364	G	A	0.63	0.7	0.68	0.57	0.06	0.33	0.77	0.64	0.61	0.51	0.37	0.34	0.24	-0.06	-0.09	-0.19	0.64	0.017	0.004	0.019	0.027	0.674	0.203	0.316	0.63	0.558	0.437	0.237	0.215	0.11	0.005	0.014	0.071	0.674	intronic	PRH1,PRR4	.
12	11013385	rs1868762	T	C	0.63	0.7	0.67	0.57	0.06	0.33	0.77	0.64	0.61	0.5	0.37	0.34	0.23	-0.06	-0.1	-0.2	0.64	0.019	0.003	0.022	0.033	0.674	0.203	0.316	0.63	0.553	0.426	0.237	0.209	0.102	0.005	0.015	0.078	0.674	intronic	PRH1,PRR4	.
12	10998614	rs7301713	T	A	0.63	0.7	0.67	0.57	0.06	0.33	0.77	0.64	0.61	0.51	0.37	0.34	0.24	-0.06	-0.1	-0.2	0.64	0.017	0.003	0.019	0.029	0.674	0.203	0.316	0.63	0.553	0.434	0.237	0.209	0.108	0.005	0.015	0.073	0.674	intronic	PRH1,PRR4	.
12	11000607	rs10161144	A	C	0.63	0.7	0.68	0.57	0.06	0.33	0.77	0.64	0.61	0.5	0.37	0.34	0.24	-0.06	-0.09	-0.2	0.64	0.018	0.004	0.021	0.029	0.674	0.203	0.316	0.63	0.558	0.433	0.237	0.215	0.107	0.005	0.014	0.074	0.674	intronic	PRH1,PRR4	.
12	11006536	rs10845268	C	G	0.63	0.7	0.68	0.57	0.06	0.33	0.77	0.63	0.61	0.5	0.36	0.34	0.24	-0.07	-0.09	-0.2	0.63	0.017	0.004	0.021	0.026	0.674	0.203	0.316	0.622	0.558	0.433	0.229	0.215	0.107	0.007	0.014	0.074	0.674	intronic	PRH1,PRR4	.
12	11007860	rs12311627	A	T	0.63	0.7	0.68	0.57	0.06	0.33	0.77	0.64	0.61	0.5	0.37	0.34	0.24	-0.06	-0.09	-0.2	0.64	0.018	0.004	0.022	0.029	0.674	0.203	0.316	0.63	0.56	0.433	0.237	0.217	0.107	0.005	0.013	0.074	0.674	intronic	PRH1,PRR4	.
12	11011883	rs12311635	T	G	0.63	0.7	0.68	0.57	0.06	0.33	0.77	0.64	0.61	0.51	0.37	0.34	0.24	-0.06	-0.09	-0.19	0.64	0.018	0.004	0.022	0.029	0.674	0.203	0.316	0.63	0.56	0.433	0.237	0.217	0.107	0.005	0.013	0.074	0.674	intronic	PRH1,PRR4	.
12	11001637	rs143545430	T	C	0.63	0.7	0.66	0.56	0.06	0.33	0.77	0.64	0.6	0.49	0.38	0.33	0.23	-0.06	-0.1	-0.21	0.64	0.019	0.002	0.02	0.034	0.674	0.198	0.323	0.63	0.545	0.422	0.243	0.207	0.104	0.005	0.018	0.08	0.674	intronic	PRH1,PRR4	.
12	11013975	rs369026631	T	C	0.63	0.7	0.68	0.57	0.06	0.34	0.77	0.64	0.61	0.5	0.37	0.34	0.23	-0.06	-0.09	-0.2	0.64	0.019	0.004	0.022	0.031	0.674	0.208	0.31	0.63	0.558	0.429	0.231	0.209	0.1	0.005	0.014	0.076	0.674	intronic	PRH1,PRR4	.
12	11012066	rs574861158	T	C	0.63	0.7	0.68	0.57	0.06	0.33	0.77	0.64	0.61	0.51	0.37	0.34	0.24	-0.06	-0.09	-0.19	0.64	0.016	0.004	0.02	0.024	0.674	0.203	0.316	0.622	0.558	0.436	0.229	0.215	0.11	0.007	0.014	0.071	0.674	intronic	PRH1,PRR4	.
12	11000176	rs61912277	C	T	0.63	0.7	0.68	0.58	0.06	0.33	0.77	0.64	0.61	0.51	0.37	0.34	0.24	-0.06	-0.09	-0.19	0.64	0.016	0.004	0.018	0.026	0.674	0.203	0.316	0.63	0.558	0.44	0.237	0.215	0.113	0.005	0.014	0.069	0.674	intronic	PRH1,PRR4	.
12	10998370	rs7136962	T	C	0.63	0.7	0.68	0.57	0.06	0.33	0.77	0.64	0.61	0.51	0.37	0.34	0.24	-0.06	-0.09	-0.19	0.64	0.017	0.004	0.019	0.027	0.674	0.203	0.316	0.63	0.558	0.437	0.237	0.215	0.11	0.005	0.014	0.071	0.674	intronic	PRH1,PRR4	.
12	11012170	rs7306372	T	C	0.63	0.7	0.68	0.57	0.06	0.33	0.77	0.64	0.61	0.51	0.37	0.34	0.24	-0.06	-0.09	-0.19	0.64	0.016	0.004	0.02	0.024	0.674	0.203	0.316	0.622	0.558	0.436	0.229	0.215	0.11	0.007	0.014	0.071	0.674	intronic	PRH1,PRR4	.
12	10990198	rs4270005	C	G	0.63	0.7	0.68	0.56	0.06	0.33	0.77	0.63	0.61	0.49	0.36	0.34	0.23	-0.07	-0.09	-0.21	0.63	0.021	0.005	0.028	0.028	0.674	0.203	0.316	0.615	0.56	0.418	0.221	0.217	0.096	0.01	0.013	0.083	0.674
12	10988717	rs7137343	G	T	0.63	0.7	0.68	0.57	0.06	0.34	0.77	0.63	0.61	0.5	0.36	0.34	0.23	-0.07	-0.09	-0.2	0.63	0.018	0.005	0.022	0.027	0.674	0.208	0.31	0.622	0.558	0.428	0.223	0.209	0.1	0.007	0.014	0.076	0.674
12	10993228	rs10772406	A	G	0.63	0.7	0.68	0.57	0.06	0.33	0.77	0.64	0.61	0.5	0.37	0.34	0.24	-0.06	-0.09	-0.2	0.64	0.019	0.004	0.022	0.031	0.674	0.203	0.316	0.63	0.558	0.429	0.237	0.215	0.105	0.005	0.014	0.076	0.674
12	10994982	rs12311490	A	G	0.63	0.7	0.68	0.57	0.06	0.33	0.77	0.64	0.61	0.51	0.37	0.34	0.24	-0.06	-0.09	-0.19	0.64	0.017	0.004	0.02	0.028	0.674	0.203	0.316	0.63	0.558	0.436	0.237	0.215	0.11	0.005	0.014	0.071	0.674
12	10991267	rs10845272	C	G	0.63	0.7	0.68	0.57	0.06	0.33	0.77	0.64	0.61	0.5	0.37	0.34	0.23	-0.06	-0.09	-0.2	0.64	0.018	0.003	0.021	0.031	0.674	0.203	0.316	0.63	0.554	0.428	0.237	0.211	0.104	0.005	0.015	0.076	0.674
12	10991202	rs10845271	C	T	0.63	0.7	0.67	0.57	0.06	0.34	0.77	0.64	0.61	0.51	0.37	0.33	0.23	-0.06	-0.1	-0.19	0.64	0.017	0.003	0.019	0.029	0.674	0.208	0.31	0.63	0.554	0.433	0.231	0.205	0.103	0.005	0.015	0.074	0.674
12	10990522	rs10772407	C	T	0.63	0.7	0.67	0.57	0.06	0.33	0.77	0.64	0.61	0.5	0.37	0.34	0.24	-0.06	-0.09	-0.2	0.64	0.019	0.004	0.022	0.031	0.674	0.203	0.316	0.63	0.556	0.429	0.237	0.213	0.105	0.005	0.014	0.076	0.674
12	10994095	rs10772407	C	A	0.63	0.7	0.67	0.57	0.06	0.33	0.77	0.64	0.6	0.5	0.37	0.33	0.23	-0.06	-0.1	-0.2	0.64	0.017	0.003	0.019	0.031	0.674	0.203	0.316	0.63	0.549	0.428	0.237	0.206	0.104	0.005	0.017	0.076	0.674
12	10992864	rs10845274	C	T	0.63	0.7	0.68	0.57	0.06	0.33	0.77	0.64	0.61	0.5	0.37	0.34	0.23	-0.06	-0.09	-0.2	0.64	0.02	0.004	0.024	0.032	0.674	0.203	0.316	0.63	0.558	0.426	0.237	0.215	0.102	0.005	0.014	0.078	0.674
12	10992633	rs10845274	G	C	0.63	0.7	0.67	0.57	0.06	0.33	0.77	0.64	0.61	0.5	0.37	0.34	0.24	-0.06	-0.1	-0.2	0.64	0.017	0.003	0.019	0.029	0.674	0.203	0.316	0.63	0.553	0.433	0.237	0.209	0.107	0.005	0.015	0.074	0.674
12	10993324	rs7310233	G	A	0.63	0.7	0.68	0.57	0.06	0.33	0.77	0.64	0.61	0.51	0.37	0.34	0.24	-0.06	-0.09	-0.19	0.64	0.019	0.003	0.021	0.033	0.674	0.203	0.316	0.637	0.558	0.433	0.245	0.215	0.107	0.003	0.014	0.074	0.674
12	10990083	rs10772403	G	A	0.63	0.7	0.68	0.57	0.06	0.33	0.77	0.64	0.61	0.51	0.38	0.35	0.24	-0.06	-0.09	-0.19	0.64	0.017	0.004	0.021	0.028	0.674	0.198	0.322	0.63	0.56	0.436	0.242	0.223	0.114	0.005	0.013	0.071	0.674
12	10988808	rs7312202	T	C	0.61	0.7	0.64	0.56	0.06	0.33	0.77	0.64	0.57	0.5	0.37	0.3	0.23	-0.06	-0.13	-0.2	0.64	0.014	0.002	0.009	0.033	0.674	0.203	0.316	0.63	0.518	0.426	0.237	0.176	0.102	0.005	0.03	0.078	0.674
12	10991506	rs12306939	T	C	0.62	0.7	0.66	0.56	0.06	0.33	0.77	0.64	0.6	0.5	0.37	0.33	0.23	-0.06	-0.1	-0.2	0.64	0.019	0.003	0.02	0.034	0.674	0.203	0.316	0.63	0.547	0.423	0.237	0.203	0.1	0.005	0.018	0.08	0.674
12	10995557	rs4418898	T	C	0.63	0.7	0.68	0.57	0.06	0.33	0.77	0.64	0.61	0.5	0.38	0.35	0.24	-0.06	-0.09	-0.2	0.64	0.019	0.004	0.022	0.031	0.674	0.198	0.322	0.63	0.558	0.429	0.242	0.22	0.109	0.005	0.014	0.076	0.674
12	10989771	rs7489266	T	C	0.63	0.7	0.68	0.57	0.06	0.33	0.77	0.64	0.61	0.51	0.37	0.34	0.24	-0.06	-0.09	-0.19	0.64	0.017	0.004	0.02	0.028	0.674	0.203	0.316	0.63	0.558	0.436	0.237	0.215	0.11	0.005	0.014	0.071	0.674
19	9217102	rs6511937	A	T	0.7	0.78	0.74	0.71	0.2	0.91	0.72	0.58	0.54	0.5	-0.13	-0.17	-0.21	0.06	0.02	-0.01	0.58	0	0.001	0.002	0.005	0.425	0.672	0.11	0.491	0.433	0.401	0.069	0.095	0.114	0.001	0.004	0.004	0.672	intergenic	OR7D4;OR7E24	.
16	53940156	rs66645139	G	A	0.41	0.7	0.45	0.34	0.04	0.37	0.68	0.66	0.41	0.3	0.32	0.07	-0.03	0.01	-0.24	-0.34	0.66	0.099	0.114	0.02	0.222	0.627	0.299	0.173	0.672	0.344	0.232	0.184	0.006	0.002	0.005	0.105	0.21	0.672	intronic	FTO	.
12	88111301	rs2468255	T	C	0.9	0.93	0.88	0.89	0.31	0.95	0.99	0.62	0.57	0.58	-0.02	-0.07	-0.06	-0.06	-0.11	-0.1	0.62	0	0.005	0.003	0.004	0.668	0.601	0.024	0.55	0.525	0.534	0.002	0.02	0.018	0.048	0.075	0.071	0.668	exonic	CEP290	synonymous
12	88041768	rs2730487	T	C	0.9	0.93	0.87	0.89	0.31	0.95	0.99	0.62	0.56	0.58	-0.02	-0.08	-0.06	-0.06	-0.12	-0.1	0.62	0.001	0.007	0.003	0.005	0.668	0.601	0.024	0.55	0.519	0.53	0.002	0.023	0.02	0.048	0.078	0.073	0.668	intronic	C12orf29	.
12	88050783	rs2468239	G	A	0.9	0.93	0.87	0.89	0.31	0.95	0.99	0.62	0.56	0.58	-0.02	-0.08	-0.06	-0.06	-0.12	-0.1	0.62	0.001	0.008	0.003	0.006	0.668	0.601	0.024	0.55	0.515	0.525	0.002	0.024	0.022	0.048	0.081	0.075	0.668	intronic	CEP290	.
12	88052645	rs2468241	G	A	0.89	0.93	0.87	0.89	0.31	0.95	0.99	0.62	0.56	0.58	-0.02	-0.08	-0.06	-0.06	-0.12	-0.1	0.62	0.001	0.008	0.003	0.003	0.668	0.601	0.024	0.55	0.515	0.537	0.002	0.024	0.017	0.048	0.081	0.069	0.668	intronic	CEP290	.
12	88064919	rs2468244	C	T	0.9	0.93	0.87	0.89	0.31	0.95	0.99	0.62	0.56	0.58	-0.02	-0.08	-0.06	-0.06	-0.12	-0.1	0.62	0.001	0.008	0.003	0.004	0.668	0.601	0.024	0.55	0.515	0.532	0.002	0.024	0.019	0.048	0.081	0.071	0.668	intronic	CEP290	.
12	88079272	rs2468245	C	T	0.9	0.93	0.87	0.89	0.31	0.95	0.99	0.62	0.56	0.58	-0.02	-0.08	-0.06	-0.06	-0.12	-0.1	0.62	0.001	0.008	0.003	0.004	0.668	0.601	0.024	0.55	0.514	0.532	0.002	0.025	0.019	0.048	0.082	0.071	0.668	intronic	CEP290	.
12	88084305	rs2468248	C	T	0.9	0.93	0.87	0.89	0.31	0.95	0.99	0.62	0.56	0.58	-0.02	-0.08	-0.06	-0.06	-0.12	-0.1	0.62	0.001	0.008	0.003	0.004	0.668	0.601	0.024	0.55	0.515	0.534	0.002	0.024	0.018	0.048	0.081	0.071	0.668	intronic	CEP290	.
12	88087004	rs2468250	A	T	0.9	0.93	0.87	0.89	0.31	0.95	0.99	0.62	0.56	0.58	-0.02	-0.08	-0.06	-0.06	-0.12	-0.1	0.62	0.001	0.008	0.003	0.004	0.668	0.601	0.024	0.55	0.515	0.534	0.002	0.024	0.018	0.048	0.081	0.071	0.668	intronic	CEP290	.
12	88089788	rs2468252	G	A	0.9	0.92	0.87	0.89	0.31	0.95	0.99	0.61	0.56	0.58	-0.03	-0.08	-0.06	-0.07	-0.12	-0.1	0.61	0.001	0.003	0.003	0.001	0.668	0.601	0.024	0.541	0.519	0.534	0.001	0.022	0.018	0.057	0.078	0.07	0.668	intronic	CEP290	.
12	88105176	rs2468253	C	G	0.9	0.93	0.88	0.89	0.31	0.95	0.99	0.62	0.57	0.58	-0.02	-0.07	-0.06	-0.06	-0.11	-0.1	0.62	0.001	0.005	0.003	0.005	0.668	0.601	0.024	0.55	0.525	0.527	0.002	0.02	0.021	0.048	0.075	0.074	0.668	intronic	CEP290	.
12	88112211	rs2468256	T	C	0.9	0.93	0.88	0.89	0.31	0.95	0.99	0.62	0.57	0.58	-0.02	-0.07	-0.06	-0.06	-0.11	-0.1	0.62	0	0.005	0.003	0.002	0.668	0.601	0.024	0.55	0.525	0.54	0.002	0.02	0.016	0.048	0.075	0.067	0.668	intronic	CEP290	.
12	88113955	rs2468257	C	T	0.9	0.92	0.88	0.89	0.31	0.95	0.99	0.61	0.57	0.58	-0.03	-0.07	-0.06	-0.07	-0.11	-0.1	0.61	0.001	0.002	0.003	0.001	0.668	0.601	0.024	0.541	0.525	0.532	0.001	0.02	0.019	0.057	0.075	0.071	0.668	intronic	CEP290	.
12	88122165	rs2468258	G	C	0.9	0.93	0.88	0.89	0.31	0.95	0.99	0.62	0.57	0.58	-0.02	-0.07	-0.06	-0.06	-0.11	-0.1	0.62	0	0.005	0.003	0.004	0.668	0.601	0.024	0.55	0.526	0.534	0.002	0.02	0.018	0.048	0.074	0.071	0.668	intronic	CEP290	.
12	88066077	rs2471506	A	C	0.9	0.93	0.87	0.89	0.31	0.95	0.99	0.62	0.56	0.58	-0.02	-0.08	-0.06	-0.06	-0.12	-0.1	0.62	0.001	0.008	0.003	0.004	0.668	0.601	0.024	0.55	0.515	0.534	0.002	0.024	0.018	0.048	0.081	0.071	0.668	intronic	CEP290	.
12	88065532	rs2471510	T	C	0.89	0.93	0.87	0.89	0.31	0.95	0.99	0.62	0.56	0.58	-0.02	-0.08	-0.06	-0.06	-0.12	-0.1	0.62	0.001	0.008	0.003	0.005	0.668	0.601	0.024	0.55	0.514	0.53	0.002	0.025	0.02	0.048	0.082	0.073	0.668	intronic	CEP290	.
12	88104633	rs2471526	G	A	0.89	0.93	0.88	0.89	0.31	0.95	0.99	0.62	0.56	0.58	-0.02	-0.07	-0.06	-0.06	-0.12	-0.1	0.62	0.001	0.006	0.003	0.007	0.668	0.601	0.024	0.55	0.521	0.523	0.002	0.022	0.022	0.048	0.078	0.076	0.668	intronic	CEP290	.
12	88104623	rs2471527	T	A	0.89	0.93	0.88	0.89	0.31	0.95	0.99	0.62	0.56	0.58	-0.02	-0.07	-0.06	-0.06	-0.12	-0.1	0.62	0.001	0.006	0.003	0.007	0.668	0.601	0.024	0.55	0.521	0.523	0.002	0.022	0.022	0.048	0.078	0.076	0.668	intronic	CEP290	.
12	88104134	rs2471528	G	T	0.89	0.93	0.88	0.89	0.31	0.95	0.99	0.62	0.57	0.58	-0.02	-0.07	-0.06	-0.06	-0.11	-0.1	0.62	0	0.005	0.003	0.004	0.668	0.601	0.024	0.55	0.525	0.534	0.002	0.02	0.018	0.048	0.075	0.071	0.668	intronic	CEP290	.
12	88103897	rs2471530	G	A	0.9	0.93	0.88	0.89	0.31	0.95	0.99	0.62	0.57	0.58	-0.02	-0.07	-0.06	-0.06	-0.11	-0.1	0.62	0	0.005	0.003	0.004	0.668	0.601	0.024	0.55	0.526	0.534	0.002	0.02	0.018	0.048	0.074	0.071	0.668	intronic	CEP290	.
12	88103783	rs2471531	C	T	0.9	0.93	0.88	0.89	0.31	0.95	0.99	0.62	0.56	0.58	-0.02	-0.07	-0.06	-0.06	-0.12	-0.1	0.62	0	0.006	0.003	0.004	0.668	0.601	0.024	0.55	0.521	0.535	0.002	0.022	0.018	0.048	0.077	0.07	0.668	intronic	CEP290	.
12	88103061	rs2471532	C	G	0.89	0.93	0.88	0.89	0.31	0.95	0.99	0.62	0.57	0.58	-0.02	-0.07	-0.06	-0.06	-0.11	-0.1	0.62	0	0.005	0.003	0.004	0.668	0.601	0.024	0.55	0.526	0.534	0.002	0.02	0.018	0.048	0.074	0.071	0.668	intronic	CEP290	.
12	88102129	rs2471533	C	A	0.9	0.93	0.88	0.89	0.31	0.95	0.99	0.62	0.57	0.58	-0.02	-0.07	-0.06	-0.06	-0.11	-0.1	0.62	0	0.005	0.003	0.004	0.668	0.601	0.024	0.55	0.525	0.534	0.002	0.02	0.018	0.048	0.075	0.071	0.668	intronic	CEP290	.
12	88094825	rs2471537	C	T	0.9	0.93	0.88	0.89	0.31	0.95	0.99	0.62	0.57	0.58	-0.02	-0.07	-0.06	-0.06	-0.11	-0.1	0.62	0	0.005	0.003	0.004	0.668	0.601	0.024	0.55	0.525	0.532	0.002	0.02	0.019	0.048	0.075	0.071	0.668	intronic	CEP290	.
12	88074722	rs2471546	G	A	0.9	0.93	0.87	0.89	0.31	0.95	0.99	0.62	0.56	0.58	-0.02	-0.08	-0.06	-0.06	-0.12	-0.1	0.62	0.001	0.008	0.003	0.005	0.668	0.601	0.024	0.55	0.515	0.53	0.002	0.024	0.02	0.048	0.081	0.073	0.668	intronic	CEP290	.
12	88116665	rs2960425	A	C	0.9	0.93	0.88	0.89	0.31	0.95	0.99	0.62	0.57	0.58	-0.02	-0.07	-0.06	-0.06	-0.11	-0.1	0.62	0	0.005	0.003	0.004	0.668	0.601	0.024	0.55	0.525	0.534	0.002	0.02	0.018	0.048	0.075	0.071	0.668	intronic	CEP290	.
3	7317418	rs10084689	A	G	0.88	0.9	0.89	0.93	0.25	0.83	0.92	0.65	0.64	0.68	0.07	0.06	0.1	-0.02	-0.03	0.01	0.68	0	0.006	0.003	0	0.625	0.5	0.031	0.586	0.611	0.667	0.016	0.017	0.048	0.005	0.002	0.003	0.667	intronic	GRM7	.
10	113074739	rs7908486	A	G	0.54	0.85	0.5	0.49	0.14	0.37	0.66	0.7	0.36	0.35	0.48	0.13	0.12	0.19	-0.16	-0.17	0.7	0.114	0.225	0.003	0.226	0.434	0.122	0.152	0.667	0.242	0.236	0.379	0.03	0.028	0.086	0.047	0.049	0.667	intronic	TCF7L2	.
21	34898114	rs2409561	T	C	0.71	0.74	0.66	0.72	0.16	0.63	0.87	0.58	0.5	0.56	0.11	0.03	0.09	-0.13	-0.21	-0.15	0.58	0.004	0.012	0.004	0.003	0.665	0.374	0.137	0.519	0.398	0.467	0.025	0.002	0.013	0.044	0.104	0.06	0.665	intronic	RUNX1	.
3	6972444	rs9865821	A	C	0.69	0.87	0.7	0.61	0.16	0.38	0.85	0.71	0.54	0.45	0.49	0.32	0.22	0.02	-0.15	-0.25	0.71	0.064	0.063	0.022	0.147	0.652	0.118	0.378	0.664	0.458	0.329	0.38	0.187	0.084	0.005	0.056	0.141	0.664	intronic	GRM7	.
7	126926995	rs11496163	A	G	0.28	0.51	0.23	0.25	0	0.16	0.66	0.51	0.23	0.25	0.35	0.07	0.09	-0.15	-0.43	-0.41	0.51	0.073	0.149	0.002	0.122	0.664	0.163	0.404	0.548	0.198	0.215	0.225	0.008	0.018	0.05	0.325	0.293	0.664	intronic	GRM8	.
12	88128675	rs2471520	T	C	0.89	0.93	0.88	0.88	0.31	0.95	0.99	0.62	0.56	0.57	-0.02	-0.07	-0.07	-0.06	-0.11	-0.11	0.62	0.001	0.005	0.003	0.007	0.663	0.596	0.024	0.545	0.519	0.518	0.002	0.02	0.022	0.048	0.075	0.076	0.663	intronic	CEP290	.
6	34023591	rs7772436	C	T	0.98	0.98	0.98	0.96	0.34	0.94	0.95	0.64	0.65	0.63	0.03	0.04	0.02	0.03	0.04	0.02	0.65	0	0.005	0.003	0.002	0.569	0.562	0.005	0.587	0.663	0.636	0.009	0.019	0.001	0.008	0.017	0	0.663	intronic	GRM4	.
16	53854527	rs7202620	C	T	0.16	0.54	0.11	0.16	0	0.19	0.67	0.53	0.11	0.16	0.35	-0.08	-0.02	-0.13	-0.56	-0.5	0.53	0.222	0.388	0.007	0.304	0.661	0.177	0.375	0.593	0.086	0.127	0.251	0.018	0.002	0.022	0.5	0.425	0.661	intronic	FTO	.
7	80490414	rs10242727	G	A	0.86	0.86	0.87	0.83	0.16	0.85	0.85	0.69	0.71	0.67	0.01	0.02	-0.01	0.01	0.02	-0.02	0.71	0.003	0.005	0.001	0.004	0.64	0.639	0.005	0.65	0.66	0.63	0.005	0.003	0.004	0.006	0.003	0.004	0.66	intronic	GNAT3	.
7	80495718	rs7776757	C	T	0.86	0.86	0.87	0.84	0.16	0.85	0.85	0.69	0.71	0.68	0.01	0.02	-0.01	0.01	0.02	-0.01	0.71	0.004	0.005	0.002	0.005	0.64	0.639	0.005	0.65	0.66	0.64	0.005	0.003	0.004	0.006	0.003	0.004	0.66	intronic	GNAT3	.
7	80493565	rs7802311	C	T	0.86	0.86	0.87	0.84	0.16	0.85	0.85	0.69	0.71	0.67	0.01	0.02	-0.01	0.01	0.02	-0.01	0.71	0.003	0.005	0.002	0.004	0.64	0.639	0.005	0.65	0.66	0.634	0.005	0.003	0.004	0.006	0.003	0.004	0.66	intronic	GNAT3	.
3	7185355	rs6775229	T	C	0.48	0.66	0.49	0.48	0.03	0.28	0.71	0.63	0.46	0.44	0.38	0.21	0.2	-0.05	-0.22	-0.23	0.63	0.022	0.04	0.002	0.053	0.66	0.207	0.31	0.632	0.405	0.376	0.239	0.091	0.074	0.003	0.085	0.102	0.66	intronic	GRM7	.
17	34015199	rs7207606	G	A	0.91	0.93	0.88	0.95	0.29	0.97	0.96	0.64	0.58	0.66	-0.04	-0.1	-0.02	-0.03	-0.09	-0.01	0.66	0.021	0.005	0.035	0.005	0.642	0.659	0.002	0.553	0.52	0.657	0.031	0.062	0.004	0.014	0.044	0.002	0.659	intronic	ASIC2	.
7	80494683	rs6975345	C	T	0.86	0.86	0.87	0.83	0.16	0.85	0.85	0.69	0.7	0.67	0.01	0.02	-0.01	0.01	0.02	-0.02	0.7	0.003	0.005	0.002	0.004	0.64	0.639	0.005	0.65	0.659	0.631	0.005	0.003	0.004	0.006	0.003	0.004	0.659	intronic	GNAT3	.
7	80495247	rs7808426	C	T	0.86	0.86	0.87	0.84	0.16	0.85	0.85	0.69	0.7	0.67	0.01	0.02	-0.01	0.01	0.02	-0.01	0.7	0.003	0.005	0.002	0.004	0.64	0.639	0.005	0.65	0.659	0.632	0.005	0.003	0.004	0.006	0.003	0.004	0.659	intronic	GNAT3	.
10	113076197	rs911769	G	A	0.56	0.84	0.53	0.5	0.14	0.37	0.66	0.7	0.39	0.36	0.47	0.17	0.13	0.18	-0.13	-0.16	0.7	0.1	0.186	0.002	0.211	0.434	0.122	0.152	0.659	0.275	0.243	0.369	0.048	0.031	0.078	0.03	0.045	0.659	intronic	TCF7L2	.
21	34838891	rs34835411	C	G	0.53	0.6	0.49	0.53	0	0.62	0.6	0.6	0.49	0.53	-0.02	-0.12	-0.09	0	-0.11	-0.07	0.6	0.006	0.022	0.001	0.003	0.606	0.624	0.004	0.657	0.453	0.493	0.007	0.027	0.007	0.005	0.021	0.004	0.657	intronic	RUNX1	.
21	34875862	rs9976377	C	G	0.88	0.99	0.81	0.89	0.33	0.91	1	0.66	0.49	0.56	0.08	-0.1	-0.03	0	-0.18	-0.11	0.66	0.05	0.117	0.015	0.061	0.657	0.526	0.069	0.607	0.393	0.504	0.042	0.035	0.001	0.001	0.149	0.085	0.657	intronic	RUNX1	.
12	6356561	rs58989823	C	T	0.81	0.8	0.78	0.85	0.26	0.95	0.74	0.54	0.52	0.59	-0.15	-0.17	-0.1	0.05	0.04	0.11	0.59	0.007	0.004	0.014	0.006	0.376	0.657	0.146	0.44	0.428	0.533	0.104	0.101	0.043	0.001	0	0.034	0.657	intronic	SCNN1A	.
12	6357205	rs7972292	C	T	0.81	0.8	0.78	0.85	0.26	0.95	0.74	0.54	0.52	0.59	-0.15	-0.17	-0.1	0.05	0.04	0.11	0.59	0.006	0.004	0.013	0.003	0.376	0.657	0.146	0.449	0.428	0.532	0.097	0.101	0.043	0.004	0	0.033	0.657	intronic	SCNN1A	.
12	10986253	rs1376251	C	T	0.61	0.7	0.66	0.55	0.05	0.32	0.77	0.65	0.61	0.5	0.37	0.33	0.22	-0.07	-0.11	-0.22	0.65	0.021	0.002	0.022	0.039	0	0	0	0.656	0.56	0.434	0.24	0.201	0.095	0.007	0.023	0.092	0.656	exonic	TAS2R50	nonsynonymous
12	11184770	rs35650731	T	C	0.61	0.7	0.66	0.55	0.08	0.34	0.77	0.63	0.58	0.47	0.37	0.32	0.21	-0.06	-0.11	-0.22	0.63	0.024	0.002	0.025	0.043	0.654	0.185	0.311	0.606	0.521	0.385	0.231	0.192	0.083	0.005	0.02	0.093	0.654	intergenic	SMIM10L1;TAS2R42	.
12	11188920	rs17817150	C	T	0.61	0.7	0.66	0.54	0.08	0.34	0.77	0.63	0.58	0.46	0.36	0.31	0.2	-0.06	-0.11	-0.23	0.63	0.026	0.001	0.027	0.047	0.654	0.19	0.305	0.606	0.517	0.378	0.225	0.183	0.074	0.005	0.021	0.098	0.654	intergenic	TAS2R42;PRB3	.
12	11192176	rs34134804	G	A	0.61	0.7	0.66	0.55	0.08	0.34	0.77	0.63	0.58	0.47	0.36	0.31	0.21	-0.06	-0.11	-0.22	0.63	0.024	0.002	0.024	0.043	0.654	0.19	0.305	0.606	0.519	0.385	0.225	0.185	0.079	0.005	0.021	0.093	0.654	intergenic	TAS2R42;PRB3	.
12	11193264	rs71453440	C	A	0.62	0.7	0.66	0.55	0.08	0.34	0.77	0.63	0.58	0.47	0.36	0.32	0.21	-0.06	-0.11	-0.22	0.63	0.023	0.002	0.024	0.041	0.654	0.19	0.305	0.606	0.521	0.389	0.225	0.187	0.081	0.005	0.02	0.09	0.654	intergenic	TAS2R42;PRB3	.
17	33848278	rs317393	G	A	0.59	0.81	0.57	0.58	0.21	0.48	0.91	0.6	0.36	0.36	0.33	0.09	0.1	-0.1	-0.34	-0.33	0.6	0.052	0.117	0.002	0.1	0.654	0.143	0.354	0.521	0.223	0.244	0.201	0.01	0.018	0.035	0.244	0.221	0.654	intronic	ASIC2	.
3	7469204	rs7623055	T	G	0.44	0.54	0.44	0.47	0.02	0.68	0.44	0.52	0.42	0.45	-0.14	-0.23	-0.21	0.1	0	0.03	0.52	0.004	0.014	0.002	0.004	0.406	0.653	0.101	0.539	0.358	0.383	0.04	0.113	0.087	0.009	0.004	0.004	0.653	intronic	GRM7	.
17	3593707	rs1566790	T	C	0.71	0.8	0.69	0.73	0.12	0.74	0.82	0.68	0.57	0.61	0.06	-0.05	-0.01	-0.01	-0.13	-0.08	0.68	0.009	0.028	0.001	0.009	0.653	0.566	0.01	0.645	0.483	0.535	0.003	0.003	0.004	0.006	0.039	0.016	0.653	intronic	TRPV1	.
1	167806350	rs150960419	T	C	0.67	0.83	0.65	0.65	0.14	0.6	0.84	0.68	0.51	0.5	0.23	0.06	0.05	-0.01	-0.19	-0.19	0.68	0.028	0.064	0.003	0.063	0.652	0.36	0.133	0.635	0.411	0.41	0.108	0.002	0.002	0.005	0.083	0.081	0.652	intergenic	MPZL1;ADCY10	.
17	34027734	rs9907439	G	A	0.58	0.71	0.56	0.59	0.06	0.62	0.55	0.65	0.49	0.53	0.1	-0.06	-0.02	0.16	0	0.04	0.65	0.023	0.06	0	0.036	0.438	0.51	0.003	0.652	0.403	0.443	0.02	0.006	0.002	0.056	0.004	0.002	0.652	intronic	ASIC2	.
14	72501065	rs2238176	C	T	0.76	0.82	0.76	0.77	0.26	0.95	0.88	0.55	0.5	0.5	-0.13	-0.19	-0.18	-0.07	-0.12	-0.12	0.55	0	0.004	0.003	0.002	0.56	0.652	0.023	0.47	0.408	0.413	0.077	0.11	0.105	0.009	0.038	0.035	0.652	intronic	RGS6	.
7	22728600	rs1524107	C	T	0.41	0.62	0.53	0.25	0.04	0.05	0.71	0.58	0.49	0.21	0.58	0.48	0.2	-0.09	-0.19	-0.47	0.58	0.145	0.014	0.147	0.256	0.651	0.004	0.638	0.577	0.408	0.132	0.562	0.395	0.124	0.017	0.076	0.369	0.651	intronic	IL6	.
7	22728630	rs2066992	G	T	0.41	0.63	0.52	0.25	0.04	0.05	0.71	0.59	0.48	0.21	0.58	0.48	0.2	-0.08	-0.19	-0.47	0.59	0.147	0.019	0.144	0.264	0.651	0.004	0.638	0.585	0.404	0.132	0.569	0.392	0.124	0.014	0.078	0.369	0.651	intronic	IL6	.
19	9208547	rs10407714	A	G	0.69	0.71	0.74	0.72	0.22	0.91	0.72	0.49	0.52	0.5	-0.2	-0.18	-0.19	-0.01	0.02	0	0.52	0.004	0.004	0.003	0.005	0.4	0.65	0.11	0.38	0.405	0.394	0.136	0.098	0.104	0.005	0.004	0.004	0.65	intergenic	OR7D2;OR7D4	.
17	34127194	rs7207988	G	T	0.82	0.89	0.79	0.83	0.22	0.82	0.91	0.67	0.57	0.61	0.07	-0.03	0.01	-0.02	-0.12	-0.08	0.67	0.005	0.016	0	0.005	0.649	0.528	0.029	0.601	0.508	0.551	0.009	0.003	0.003	0.002	0.038	0.021	0.649	intronic	ASIC2	.
14	20219819	rs8014956	T	G	0.4	0.61	0.37	0.41	0.01	0.38	0.56	0.6	0.35	0.39	0.23	-0.01	0.03	0.06	-0.19	-0.15	0.6	0.053	0.124	0.002	0.082	0.535	0.354	0.058	0.648	0.306	0.347	0.11	0.004	0.001	0.003	0.068	0.037	0.648	intergenic	OR11G2(dist=21446),OR11H6(dist=3891)	.
17	33371552	rs1394394	C	T	0.27	0.75	0.24	0.22	0.08	0.2	0.77	0.67	0.16	0.14	0.55	0.04	0.02	-0.02	-0.52	-0.55	0.67	0.253	0.398	0.003	0.418	0.647	0.053	0.481	0.628	0.074	0.063	0.441	0.001	0.003	0.003	0.439	0.458	0.647	intronic	ASIC2	.
17	33371974	rs72625909	G	T	0.27	0.74	0.24	0.23	0.08	0.2	0.77	0.66	0.16	0.14	0.55	0.05	0.03	-0.02	-0.52	-0.54	0.66	0.244	0.392	0.003	0.403	0.647	0.049	0.488	0.62	0.073	0.067	0.44	0.001	0.001	0.001	0.442	0.451	0.647	intronic	ASIC2	.
17	34040201	rs8072026	G	A	0.64	0.69	0.65	0.63	0.06	0.68	0.5	0.63	0.59	0.58	0.01	-0.03	-0.04	0.19	0.15	0.14	0.63	0.001	0.005	0.004	0.008	0.39	0.592	0.061	0.646	0.518	0.505	0.004	0.001	0.001	0.08	0.035	0.031	0.646	intronic	ASIC2	.
16	53903389	rs12102397	G	A	0.8	0.92	0.83	0.78	0.32	0.75	0.99	0.6	0.5	0.46	0.18	0.08	0.04	-0.06	-0.16	-0.2	0.6	0.031	0.041	0.005	0.078	0.646	0.301	0.217	0.534	0.409	0.335	0.102	0.013	0.003	0.037	0.124	0.168	0.646	intronic	FTO	.
3	7041371	rs9839143	A	G	0.44	0.71	0.36	0.43	0.06	0.48	0.57	0.66	0.31	0.38	0.23	-0.12	-0.05	0.14	-0.21	-0.14	0.66	0.094	0.215	0.013	0.126	0.475	0.383	0.01	0.646	0.219	0.303	0.089	0.032	0	0.031	0.09	0.031	0.646	intronic	GRM7	.
17	3615766	rs150854	T	G	0.43	0.58	0.38	0.38	0.04	0.4	0.71	0.54	0.34	0.34	0.17	-0.02	-0.02	-0.13	-0.33	-0.33	0.54	0.033	0.066	0.003	0.074	0.646	0.322	0.168	0.553	0.286	0.271	0.059	0.005	0.003	0.027	0.176	0.187	0.646	intronic	SHPK	.
17	3616887	rs222781	G	A	0.45	0.61	0.41	0.39	0.04	0.4	0.71	0.56	0.36	0.35	0.2	0	-0.01	-0.1	-0.3	-0.32	0.56	0.038	0.068	0.002	0.086	0.646	0.322	0.168	0.577	0.308	0.281	0.077	0.004	0.004	0.015	0.153	0.176	0.646	intronic	SHPK	.
12	6338356	rs4149577	A	G	0.44	0.71	0.43	0.42	0.06	0.42	0.59	0.66	0.38	0.36	0.29	0.01	0	0.12	-0.16	-0.17	0.66	0.071	0.139	0.004	0.145	0.491	0.317	0.048	0.646	0.292	0.28	0.141	0.004	0.004	0.024	0.048	0.052	0.646	intronic	TNFRSF1A	.
17	3606538	rs182637	C	T	0.48	0.61	0.44	0.43	0.04	0.41	0.71	0.56	0.4	0.39	0.2	0.03	0.02	-0.1	-0.27	-0.28	0.56	0.023	0.043	0.003	0.057	0.646	0.328	0.163	0.577	0.346	0.319	0.074	0	0.003	0.015	0.118	0.138	0.646	intronic	TRPV1	.
15	40315488	rs882829	C	G	0.17	0.61	0.15	0.1	0	0.04	0.61	0.61	0.15	0.1	0.58	0.11	0.07	0.01	-0.46	-0.5	0.61	0.275	0.361	0.007	0.454	0.611	0.032	0.539	0.644	0.133	0.088	0.559	0.068	0.03	0.006	0.366	0.45	0.644	intergenic	PLCB2;INAFM2	.
7	22726627	rs1800796	G	C	0.41	0.66	0.52	0.25	0.08	0.05	0.72	0.58	0.44	0.17	0.61	0.48	0.21	-0.06	-0.2	-0.47	0.61	0.152	0.033	0.135	0.284	0.599	0.004	0.644	0.544	0.345	0.088	0.599	0.391	0.131	0.006	0.082	0.364	0.644	upstream	IL6	.
3	10293488	rs10490816	G	C	0.48	0.61	0.53	0.45	0.01	0.25	0.55	0.6	0.52	0.44	0.35	0.28	0.2	0.05	-0.02	-0.1	0.6	0.02	0.007	0.012	0.048	0.539	0.234	0.168	0.644	0.483	0.385	0.232	0.147	0.073	0.001	0.003	0.018	0.644	upstream;downstream	GHRL;GHRLOS	.
7	80478482	rs6467192	A	G	0.86	0.86	0.87	0.85	0.18	0.85	0.85	0.68	0.69	0.67	0.01	0.02	0	0	0.01	-0.01	0.69	0.004	0.005	0.003	0.005	0.629	0.621	0.005	0.631	0.643	0.631	0.005	0.003	0.004	0.006	0.004	0.004	0.643	intronic	GNAT3	.
3	7320990	rs9855012	T	A	0.88	0.9	0.89	0.93	0.27	0.82	0.91	0.63	0.62	0.66	0.08	0.06	0.11	-0.01	-0.03	0.02	0.66	0.001	0.006	0.002	0.001	0.596	0.47	0.03	0.563	0.59	0.643	0.019	0.019	0.049	0.006	0.003	0.003	0.643	intronic	GRM7	.
7	45664372	rs1042009	G	A	0.71	0.5	0.77	0.72	0.08	0.68	0.3	0.42	0.69	0.64	-0.18	0.1	0.04	0.2	0.48	0.42	0.69	0.078	0.171	0.003	0.115	0.141	0.555	0.25	0.355	0.642	0.58	0.072	0.019	0.001	0.063	0.37	0.305	0.642	exonic	ADCY1	synonymous
17	34031889	rs12451135	G	A	0.58	0.67	0.56	0.59	0.05	0.66	0.5	0.62	0.51	0.54	0.01	-0.1	-0.08	0.17	0.06	0.09	0.62	0.011	0.032	0.002	0.019	0.407	0.591	0.05	0.641	0.436	0.46	0.005	0.022	0.012	0.064	0.001	0.009	0.641	intronic	ASIC2	.
12	11017553	rs10845291	C	T	0.48	0.68	0.5	0.41	0.05	0.29	0.66	0.64	0.46	0.36	0.39	0.22	0.12	0.03	-0.15	-0.25	0.64	0.053	0.056	0.013	0.127	0.581	0.19	0.235	0.641	0.392	0.295	0.267	0.09	0.032	0.003	0.04	0.104	0.641	intronic	PRH1,PRR4	.
3	7099170	rs17288498	A	G	0.68	0.62	0.66	0.69	0.06	0.73	0.63	0.56	0.6	0.63	-0.11	-0.06	-0.04	-0.01	0.03	0.06	0.63	0.001	0.004	0.003	0.007	0.531	0.64	0.016	0.541	0.555	0.567	0.024	0.003	0.001	0.005	0	0.003	0.64	intronic	GRM7	.
10	113077816	rs11817385	C	T	0.55	0.84	0.53	0.5	0.16	0.36	0.66	0.68	0.37	0.34	0.48	0.17	0.13	0.19	-0.13	-0.16	0.68	0.104	0.193	0.002	0.217	0.408	0.101	0.152	0.64	0.249	0.218	0.375	0.046	0.031	0.082	0.031	0.046	0.64	intronic	TCF7L2	.
17	34071392	rs11653951	T	C	0.63	0.68	0.64	0.63	0.06	0.68	0.48	0.63	0.59	0.58	0	-0.04	-0.05	0.21	0.17	0.16	0.63	0.001	0.004	0.003	0.007	0.369	0.597	0.078	0.639	0.515	0.499	0.005	0.001	0.003	0.089	0.045	0.039	0.639	intronic	ASIC2	.
17	34066863	rs35241588	C	A	0.63	0.68	0.64	0.62	0.06	0.66	0.48	0.63	0.59	0.56	0.02	-0.02	-0.04	0.21	0.17	0.14	0.63	0.002	0.004	0.003	0.011	0.369	0.575	0.063	0.639	0.515	0.486	0.003	0.003	0.001	0.089	0.045	0.032	0.639	intronic	ASIC2	.
17	34072955	rs886359	G	A	0.63	0.68	0.64	0.63	0.06	0.68	0.48	0.63	0.58	0.58	0	-0.05	-0.05	0.2	0.16	0.15	0.63	0.001	0.006	0.003	0.007	0.374	0.597	0.075	0.639	0.508	0.497	0.005	0.002	0.003	0.085	0.038	0.036	0.639	intronic	ASIC2	.
17	33859875	rs317341	C	T	0.57	0.83	0.64	0.51	0.15	0.47	0.71	0.68	0.49	0.35	0.36	0.17	0.03	0.12	-0.07	-0.2	0.68	0.097	0.079	0.042	0.209	0.478	0.213	0.103	0.638	0.394	0.224	0.242	0.055	0.004	0.039	0.004	0.084	0.638	intronic	ASIC2	.
6	33699340	rs4713658	C	G	0.79	0.78	0.81	0.76	0.2	0.47	0.88	0.58	0.61	0.56	0.31	0.34	0.29	-0.1	-0.08	-0.13	0.61	0	0.004	0.003	0.002	0.638	0.149	0.326	0.506	0.53	0.465	0.179	0.216	0.157	0.033	0.02	0.049	0.638	intronic	C6orf125	.
6	34076260	rs4314495	G	A	0.67	0.41	0.66	0.74	0.13	0.81	0.45	0.28	0.54	0.62	-0.4	-0.15	-0.07	-0.04	0.21	0.29	0.62	0.093	0.121	0.009	0.205	0.223	0.638	0.24	0.194	0.454	0.543	0.29	0.045	0.008	0.003	0.089	0.164	0.638	intronic	GRM4	.
17	33863298	rs441618	G	A	0.57	0.83	0.64	0.5	0.15	0.47	0.71	0.68	0.49	0.35	0.35	0.16	0.03	0.12	-0.07	-0.21	0.68	0.095	0.075	0.042	0.204	0.485	0.22	0.103	0.637	0.397	0.227	0.233	0.054	0.004	0.034	0.005	0.086	0.637	intronic	ASIC2	.
6	34019258	rs6457756	C	T	0.97	0.98	0.98	0.96	0.35	0.94	0.95	0.63	0.63	0.61	0.03	0.03	0.02	0.03	0.03	0.01	0.63	0	0.005	0.001	0	0.553	0.547	0.005	0.572	0.637	0.612	0.009	0.01	0.002	0.008	0.008	0.002	0.637	UTR3	GRM4	.
16	53905491	rs9929152	G	A	0.79	0.92	0.82	0.79	0.33	0.75	0.99	0.59	0.48	0.46	0.17	0.07	0.04	-0.06	-0.17	-0.19	0.59	0.028	0.048	0	0.071	0.636	0.297	0.212	0.524	0.383	0.337	0.098	0.006	0.003	0.037	0.133	0.159	0.636	intronic	FTO	.
6	34026914	rs6902110	A	G	0.99	0.98	1	0.99	0.4	0.96	0.99	0.58	0.6	0.6	0.01	0.03	0.03	-0.01	0.01	0	0.6	0.004	0.012	0.002	0.005	0.577	0.529	0.01	0.522	0.631	0.636	0.002	0.027	0.02	0.001	0.001	0.003	0.636	intronic	GRM4	.
14	72518171	rs2189810	A	G	0.56	0.76	0.58	0.53	0.18	0.51	0.86	0.58	0.4	0.35	0.25	0.07	0.02	-0.1	-0.28	-0.33	0.58	0.037	0.048	0.004	0.09	0.635	0.219	0.245	0.514	0.312	0.242	0.119	0.013	0.002	0.026	0.143	0.2	0.635	intronic	RGS6	.
3	7033708	rs1240433	T	C	0.42	0.68	0.36	0.41	0.05	0.51	0.54	0.64	0.32	0.36	0.18	-0.14	-0.1	0.14	-0.18	-0.14	0.64	0.08	0.178	0.003	0.126	0.46	0.422	0.002	0.634	0.241	0.289	0.052	0.039	0.014	0.03	0.063	0.031	0.634	intronic	GRM7	.
15	25331372	rs7177534	T	A	0.69	0.67	0.69	0.66	0.08	0.75	0.58	0.58	0.61	0.57	-0.09	-0.06	-0.09	0.08	0.11	0.08	0.61	0.004	0.004	0.003	0.005	0.439	0.633	0.058	0.567	0.536	0.509	0.009	0.007	0.013	0.013	0.019	0.011	0.633	intergenic	SNORD109B(dist=52963),UBE3A(dist=5877)	.
17	34037703	rs4795846	C	T	0.58	0.67	0.57	0.59	0.05	0.66	0.49	0.62	0.52	0.54	0.01	-0.09	-0.08	0.18	0.08	0.1	0.62	0.009	0.025	0.003	0.018	0.388	0.583	0.057	0.633	0.443	0.457	0.005	0.016	0.01	0.071	0.007	0.014	0.633	intronic	ASIC2	.
17	34012643	rs9899594	T	C	0.54	0.58	0.53	0.48	0	0.46	0.6	0.58	0.52	0.47	0.12	0.06	0.01	-0.01	-0.07	-0.12	0.58	0.006	0.004	0	0.019	0.593	0.463	0.03	0.633	0.476	0.429	0.025	0.002	0.003	0.006	0.008	0.023	0.633	intronic	ASIC2	.
9	6567841	rs7870809	A	C	0.47	0.81	0.41	0.48	0.13	0.32	0.75	0.68	0.28	0.35	0.49	0.09	0.16	0.06	-0.34	-0.27	0.68	0.118	0.257	0.006	0.186	0.564	0.098	0.31	0.632	0.174	0.238	0.369	0.013	0.046	0.001	0.204	0.138	0.632	intronic	GLDC	.
6	154013494	rs712243	A	G	0.52	0.58	0.59	0.45	0	0.26	0.53	0.58	0.59	0.45	0.32	0.33	0.19	0.05	0.06	-0.08	0.59	0.025	0.004	0.038	0.024	0.533	0.268	0.133	0.631	0.565	0.411	0.183	0.201	0.072	0.001	0.006	0.007	0.631	intronic	OPRM1	.
6	154014015	rs712244	A	G	0.52	0.58	0.58	0.46	0	0.26	0.53	0.58	0.58	0.46	0.32	0.32	0.19	0.05	0.05	-0.07	0.58	0.023	0.005	0.034	0.023	0.533	0.268	0.133	0.631	0.56	0.415	0.183	0.197	0.074	0.001	0.005	0.006	0.631	intronic	OPRM1	.
7	45676115	rs2471257	T	C	0.71	0.52	0.76	0.74	0.08	0.69	0.31	0.44	0.68	0.66	-0.18	0.07	0.05	0.21	0.45	0.44	0.68	0.068	0.138	0.002	0.12	0.151	0.572	0.256	0.379	0.63	0.606	0.069	0.008	0.003	0.071	0.344	0.322	0.63	intronic	ADCY1	.
1	8961242	rs12735688	C	T	0.43	0.64	0.44	0.4	0.04	0.3	0.61	0.61	0.41	0.36	0.34	0.14	0.09	0.03	-0.17	-0.21	0.61	0.05	0.082	0	0.115	0.549	0.224	0.17	0.63	0.34	0.294	0.216	0.035	0.016	0.002	0.052	0.08	0.63	intronic	CA6	.
16	53893411	rs11076008	A	G	0.78	0.82	0.8	0.8	0.25	0.8	0.92	0.57	0.56	0.56	0.02	0	0	-0.1	-0.12	-0.12	0.57	0.002	0.001	0.003	0.001	0.63	0.472	0.048	0.503	0.453	0.459	0.005	0.003	0.004	0.028	0.059	0.055	0.63	intronic	FTO	.
19	35360383	rs395983	T	C	0.54	0.32	0.5	0.61	0.02	0.25	0	0.3	0.48	0.59	0.07	0.25	0.36	0.31	0.5	0.61	0.61	0.052	0.043	0.025	0.158	0.007	0.202	0.241	0.404	0.455	0.599	0.008	0.108	0.238	0.503	0.488	0.628	0.628	UTR3	FFAR3	.
7	126741195	rs2237768	G	A	0.46	0.64	0.44	0.43	0.03	0.37	0.38	0.61	0.42	0.41	0.27	0.07	0.07	0.25	0.06	0.05	0.61	0.033	0.073	0.003	0.067	0.325	0.313	0.005	0.627	0.345	0.348	0.126	0.004	0.006	0.112	0	0.002	0.627	intronic	GRM8	.
7	126746014	rs3808150	C	G	0.46	0.64	0.45	0.44	0.03	0.37	0.38	0.61	0.42	0.41	0.26	0.07	0.06	0.25	0.06	0.05	0.61	0.032	0.071	0.003	0.065	0.325	0.319	0.005	0.627	0.349	0.351	0.121	0.003	0.006	0.112	0.001	0.003	0.627	intronic	GRM8	.
16	53698703	rs62048366	T	C	0.59	0.4	0.59	0.6	0.05	0.7	0.46	0.35	0.54	0.55	-0.3	-0.11	-0.1	-0.05	0.13	0.15	0.55	0.025	0.048	0.003	0.058	0.357	0.627	0.112	0.342	0.464	0.477	0.15	0.027	0.02	0.003	0.026	0.034	0.627	intronic	RPGRIP1L	.
17	33724889	rs1565510	C	T	0.71	0.67	0.63	0.78	0.13	0.8	0.65	0.54	0.5	0.65	-0.13	-0.18	-0.02	0.02	-0.02	0.13	0.65	0.026	0.002	0.043	0.019	0.443	0.626	0.052	0.488	0.411	0.579	0.036	0.062	0.002	0.005	0.004	0.033	0.626	intronic	ASIC2	.
3	7036867	rs189259	C	T	0.41	0.68	0.36	0.39	0.05	0.5	0.54	0.63	0.31	0.34	0.18	-0.14	-0.11	0.14	-0.18	-0.15	0.63	0.087	0.189	0.001	0.141	0.451	0.408	0.002	0.625	0.224	0.266	0.056	0.042	0.018	0.03	0.071	0.04	0.625	intronic	GRM7	.
7	143224141	rs534126	T	C	0.74	0.9	0.8	0.69	0.27	0.7	0.93	0.63	0.53	0.42	0.2	0.11	-0.01	-0.03	-0.13	-0.24	0.63	0.056	0.021	0.039	0.109	0.624	0.307	0.165	0.554	0.455	0.285	0.101	0.029	0.004	0.003	0.058	0.166	0.624	intergenic	TAS2R40;LOC105375545	.
7	45665861	rs2471263	A	G	0.7	0.52	0.76	0.72	0.08	0.68	0.31	0.43	0.68	0.63	-0.16	0.08	0.04	0.2	0.45	0.41	0.68	0.066	0.145	0.001	0.102	0.149	0.547	0.233	0.362	0.624	0.572	0.062	0.014	0.001	0.062	0.338	0.286	0.624	intronic	ADCY1	.
7	45667022	rs6977046	A	T	0.7	0.52	0.76	0.72	0.08	0.66	0.31	0.44	0.68	0.64	-0.14	0.1	0.06	0.2	0.45	0.4	0.68	0.063	0.139	0	0.1	0.156	0.532	0.21	0.371	0.624	0.576	0.048	0.02	0.005	0.062	0.331	0.284	0.624	intronic	ADCY1	.
17	34064553	rs4795854	T	A	0.62	0.67	0.64	0.62	0.06	0.66	0.47	0.61	0.58	0.56	0.01	-0.02	-0.04	0.2	0.17	0.15	0.61	0	0.001	0.003	0.006	0.364	0.575	0.066	0.624	0.512	0.485	0.005	0.002	0.002	0.081	0.046	0.035	0.624	intronic	ASIC2	.
10	113138334	rs3814573	C	T	0.48	0.68	0.45	0.47	0.09	0.39	0.75	0.59	0.36	0.39	0.29	0.06	0.08	-0.07	-0.31	-0.28	0.59	0.04	0.088	0.003	0.077	0.624	0.222	0.234	0.558	0.274	0.283	0.147	0.005	0.008	0.008	0.162	0.149	0.624	intronic	TCF7L2	.
3	10291680	rs3755777	C	G	0.48	0.58	0.53	0.45	0.01	0.25	0.53	0.57	0.52	0.44	0.33	0.28	0.19	0.05	0	-0.08	0.57	0.016	0.002	0.012	0.037	0.514	0.234	0.144	0.624	0.482	0.386	0.21	0.147	0.072	0.002	0.004	0.01	0.624	ncRNA_intronic	GHRLOS	.
10	112971038	rs12573128	G	A	0.65	0.32	0.61	0.73	0.34	0.89	0.22	-0.02	0.27	0.39	-0.58	-0.28	-0.17	0.09	0.39	0.5	0.5	0.14	0.16	0.028	0.3	0.028	0.486	0.623	0.004	0.134	0.266	0.539	0.179	0.075	0.014	0.259	0.403	0.623	intronic	TCF7L2	.
19	33815993	rs29944	G	A	0.45	0.74	0.48	0.4	0.11	0.3	0.71	0.64	0.37	0.3	0.44	0.18	0.1	0.03	-0.23	-0.31	0.64	0.102	0.15	0.008	0.224	0.552	0.109	0.285	0.621	0.264	0.188	0.34	0.054	0.015	0	0.108	0.177	0.621	downstream	KCTD15	.
19	9222829	rs10415000	G	C	0.57	0.66	0.53	0.58	0.08	0.74	0.58	0.58	0.45	0.5	-0.08	-0.21	-0.16	0.08	-0.05	0	0.58	0.004	0.014	0.001	0.003	0.439	0.621	0.051	0.528	0.372	0.409	0.018	0.078	0.052	0.001	0.001	0.004	0.621	intergenic	OR7D4;OR7E24	.
19	9220406	rs10425509	A	G	0.56	0.66	0.51	0.58	0.08	0.74	0.58	0.58	0.43	0.5	-0.08	-0.23	-0.16	0.08	-0.07	0	0.58	0.007	0.022	0.002	0.003	0.433	0.621	0.054	0.528	0.353	0.407	0.018	0.091	0.054	0.002	0.001	0.004	0.621	intergenic	OR7D4;OR7E24	.
19	9221593	rs62103642	T	C	0.56	0.64	0.52	0.57	0.08	0.74	0.58	0.56	0.43	0.48	-0.1	-0.23	-0.17	0.07	-0.06	-0.01	0.56	0.004	0.014	0	0.002	0.433	0.621	0.054	0.512	0.357	0.398	0.025	0.089	0.06	0.001	0.001	0.004	0.621	intergenic	OR7D4;OR7E24	.
7	127135144	rs2040502	T	C	0.38	0.75	0.34	0.35	0.11	0.26	0.65	0.64	0.23	0.24	0.49	0.08	0.09	0.1	-0.31	-0.3	0.64	0.161	0.283	0.003	0.297	0.473	0.074	0.254	0.621	0.143	0.13	0.392	0.013	0.008	0.025	0.159	0.173	0.621	intronic	GRM8	.
7	127205704	rs2237801	T	C	0.71	0.92	0.64	0.76	0.24	0.64	0.87	0.68	0.4	0.53	0.28	0	0.13	0.05	-0.23	-0.11	0.68	0.08	0.179	0.034	0.073	0.573	0.277	0.132	0.621	0.266	0.423	0.184	0.004	0.03	0.005	0.131	0.035	0.621	intronic	GRM8	.
7	127145802	rs2299542	A	G	0.39	0.75	0.34	0.36	0.11	0.3	0.65	0.64	0.23	0.25	0.45	0.04	0.06	0.1	-0.31	-0.29	0.64	0.158	0.287	0.003	0.286	0.473	0.104	0.212	0.621	0.14	0.138	0.347	0.001	0.001	0.025	0.163	0.163	0.621	intronic	GRM8	.
10	112967084	rs11196172	G	A	0.34	0.64	0.38	0.27	0.08	0.1	0.74	0.56	0.3	0.19	0.54	0.28	0.18	-0.1	-0.36	-0.47	0.56	0.114	0.123	0.026	0.251	0.621	0.003	0.592	0.537	0.211	0.104	0.5	0.183	0.082	0.017	0.225	0.362	0.621	intronic	TCF7L2	.
10	112967308	rs11196173	C	T	0.34	0.63	0.38	0.27	0.08	0.1	0.74	0.55	0.3	0.2	0.53	0.28	0.17	-0.11	-0.36	-0.46	0.55	0.108	0.116	0.025	0.239	0.621	0.002	0.584	0.529	0.211	0.107	0.484	0.177	0.079	0.02	0.224	0.358	0.621	intronic	TCF7L2	.
16	53902846	rs11076009	G	C	0.5	0.76	0.51	0.46	0.24	0.33	0.9	0.52	0.28	0.22	0.42	0.18	0.13	-0.15	-0.39	-0.44	0.52	0.069	0.107	0.003	0.158	0.62	0.019	0.511	0.42	0.145	0.095	0.295	0.06	0.027	0.075	0.29	0.348	0.62	intronic	FTO	.
3	7029259	rs1240435	G	A	0.4	0.67	0.36	0.38	0.05	0.43	0.54	0.62	0.32	0.34	0.23	-0.07	-0.05	0.12	-0.18	-0.16	0.62	0.079	0.17	0.001	0.135	0.46	0.346	0.018	0.62	0.235	0.266	0.093	0.01	0	0.023	0.067	0.044	0.62	intronic	GRM7	.
3	7031136	rs1566366	C	T	0.41	0.67	0.37	0.39	0.05	0.44	0.53	0.62	0.32	0.34	0.23	-0.07	-0.05	0.13	-0.17	-0.15	0.62	0.077	0.166	0.001	0.131	0.449	0.351	0.012	0.62	0.239	0.27	0.089	0.01	0.001	0.027	0.058	0.036	0.62	intronic	GRM7	.
16	53703088	rs11075984	G	A	0.58	0.37	0.58	0.58	0.06	0.7	0.45	0.32	0.52	0.52	-0.33	-0.12	-0.13	-0.08	0.13	0.12	0.52	0.028	0.061	0.003	0.059	0.343	0.619	0.116	0.3	0.448	0.439	0.178	0.031	0.033	0.003	0.025	0.023	0.619	intronic	RPGRIP1L	.
1	248601079	rs73134451	A	G	0.99	1	1	0.99	0.41	1	1	0.59	0.59	0.58	0	0	-0.01	0	0	-0.01	0.59	0.002	0	0.003	0.001	0.579	0.574	0	0.535	0.618	0.618	0	0	0.001	0	0	0.001	0.618	intergenic	OR2T10;OR2T11	.
7	45669805	rs2461110	A	G	0.7	0.51	0.75	0.72	0.08	0.68	0.31	0.42	0.67	0.64	-0.17	0.08	0.05	0.2	0.44	0.41	0.67	0.069	0.145	0.001	0.112	0.149	0.547	0.233	0.354	0.618	0.577	0.067	0.012	0.002	0.057	0.331	0.292	0.618	intronic	ADCY1	.
16	53917441	rs7197167	G	T	0.82	0.92	0.84	0.82	0.38	0.8	1	0.55	0.47	0.45	0.13	0.04	0.03	-0.08	-0.16	-0.18	0.55	0.017	0.033	0.002	0.044	0.618	0.306	0.201	0.476	0.37	0.343	0.061	0.001	0.003	0.08	0.14	0.153	0.618	intronic	FTO	.
3	7036734	rs170919	G	A	0.41	0.67	0.36	0.4	0.05	0.5	0.54	0.62	0.31	0.35	0.17	-0.14	-0.1	0.13	-0.18	-0.14	0.62	0.08	0.178	0.003	0.126	0.451	0.408	0.002	0.618	0.227	0.275	0.051	0.04	0.014	0.026	0.068	0.034	0.618	intronic	GRM7	.
7	143224416	rs557797	C	T	0.74	0.91	0.8	0.7	0.27	0.7	0.93	0.64	0.53	0.43	0.21	0.1	0	-0.02	-0.13	-0.23	0.64	0.057	0.027	0.036	0.113	0.617	0.307	0.157	0.563	0.453	0.29	0.11	0.028	0.004	0.002	0.053	0.155	0.617	intergenic	TAS2R40;LOC105375545	.
17	34054592	rs1023527	A	T	0.62	0.66	0.65	0.61	0.06	0.66	0.48	0.6	0.59	0.56	0	-0.01	-0.05	0.18	0.17	0.14	0.6	0	0.002	0.001	0.006	0.369	0.575	0.063	0.617	0.519	0.478	0.005	0.003	0.003	0.072	0.047	0.029	0.617	intronic	ASIC2	.
17	34062298	rs11871695	T	A	0.63	0.66	0.65	0.62	0.06	0.66	0.47	0.6	0.59	0.57	0	-0.01	-0.04	0.19	0.18	0.16	0.6	0.001	0.002	0.003	0.003	0.359	0.575	0.07	0.617	0.519	0.491	0.005	0.003	0.001	0.079	0.053	0.04	0.617	intronic	ASIC2	.
17	34054854	rs1859220	T	C	0.62	0.66	0.64	0.62	0.06	0.66	0.48	0.6	0.59	0.56	0	-0.02	-0.05	0.18	0.17	0.14	0.6	0.001	0.002	0.002	0.004	0.369	0.575	0.063	0.617	0.515	0.485	0.005	0.003	0.001	0.072	0.045	0.032	0.617	intronic	ASIC2	.
17	34060642	rs2189327	T	C	0.63	0.66	0.65	0.63	0.06	0.66	0.47	0.6	0.59	0.57	0	-0.01	-0.04	0.19	0.18	0.15	0.6	0.001	0.002	0.003	0.002	0.364	0.575	0.066	0.617	0.521	0.493	0.005	0.003	0	0.076	0.051	0.039	0.617	intronic	ASIC2	.
17	34049264	rs6505394	G	C	0.62	0.66	0.65	0.62	0.06	0.66	0.47	0.6	0.59	0.57	0	-0.01	-0.04	0.19	0.18	0.15	0.6	0.001	0.002	0.002	0.003	0.364	0.575	0.066	0.617	0.519	0.488	0.005	0.003	0.001	0.075	0.05	0.036	0.617	intronic	ASIC2	.
17	34057006	rs6505395	T	G	0.62	0.66	0.65	0.62	0.06	0.66	0.48	0.6	0.59	0.57	0	-0.01	-0.04	0.18	0.17	0.15	0.6	0.001	0.002	0.003	0.003	0.369	0.575	0.063	0.617	0.519	0.491	0.005	0.003	0	0.072	0.047	0.035	0.617	intronic	ASIC2	.
3	7020778	rs1154370	G	T	0.41	0.68	0.37	0.4	0.06	0.51	0.54	0.63	0.31	0.35	0.18	-0.14	-0.1	0.14	-0.17	-0.14	0.63	0.081	0.178	0.001	0.132	0.438	0.404	0.003	0.617	0.226	0.268	0.052	0.039	0.016	0.032	0.06	0.031	0.617	intronic	GRM7	.
3	7024596	rs1240436	C	G	0.42	0.68	0.36	0.4	0.06	0.51	0.54	0.63	0.31	0.35	0.18	-0.14	-0.1	0.14	-0.18	-0.13	0.63	0.083	0.184	0.003	0.129	0.438	0.404	0.003	0.617	0.22	0.271	0.052	0.042	0.015	0.032	0.064	0.03	0.617	intronic	GRM7	.
3	7020624	rs9840112	C	A	0.41	0.68	0.37	0.4	0.06	0.51	0.54	0.63	0.31	0.34	0.18	-0.14	-0.11	0.14	-0.17	-0.14	0.63	0.081	0.177	0.001	0.135	0.438	0.404	0.003	0.617	0.227	0.265	0.052	0.038	0.017	0.032	0.059	0.033	0.617	intronic	GRM7	.
3	10283954	rs17032621	A	G	0.46	0.56	0.48	0.42	0.02	0.12	0.65	0.54	0.46	0.4	0.44	0.36	0.3	-0.09	-0.16	-0.22	0.54	0.01	0.003	0.005	0.027	0.617	0.075	0.446	0.554	0.41	0.338	0.345	0.247	0.181	0.016	0.05	0.097	0.617	upstream	C3orf42	.
3	7016689	rs1391951	A	C	0.49	0.69	0.43	0.49	0.06	0.62	0.54	0.63	0.37	0.43	0.07	-0.19	-0.13	0.15	-0.11	-0.05	0.63	0.047	0.111	0.002	0.072	0.43	0.523	0.008	0.616	0.295	0.342	0.002	0.063	0.033	0.036	0.017	0.002	0.616	intronic	GRM7	.
1	8957975	rs7545200	A	G	0.78	0.82	0.82	0.75	0.16	0.75	0.81	0.66	0.66	0.59	0.07	0.06	0	0.01	0.01	-0.05	0.66	0.004	0.005	0.006	0.006	0.591	0.526	0.003	0.615	0.603	0.53	0.008	0.008	0.004	0.005	0.004	0.002	0.615	intronic	CA6	.
19	9220157	rs10419559	T	C	0.56	0.66	0.52	0.57	0.09	0.74	0.58	0.57	0.43	0.49	-0.08	-0.23	-0.17	0.08	-0.06	0	0.57	0.006	0.02	0.001	0.004	0.426	0.614	0.054	0.52	0.35	0.396	0.018	0.089	0.056	0.002	0.001	0.004	0.614	intergenic	OR7D4;OR7E24	.
14	72508131	rs12586412	A	G	0.55	0.77	0.56	0.49	0.21	0.45	0.87	0.56	0.35	0.29	0.32	0.11	0.04	-0.1	-0.31	-0.38	0.56	0.06	0.072	0.011	0.141	0.614	0.121	0.333	0.484	0.247	0.159	0.191	0.031	0	0.029	0.181	0.264	0.614	intronic	RGS6	.
14	72508791	rs12885387	A	C	0.55	0.75	0.56	0.52	0.21	0.56	0.87	0.54	0.36	0.31	0.19	0.01	-0.04	-0.12	-0.31	-0.36	0.54	0.041	0.058	0.003	0.1	0.614	0.224	0.218	0.459	0.244	0.183	0.076	0.003	0.002	0.043	0.184	0.238	0.614	intronic	RGS6	.
15	25396684	rs7163944	C	T	0.7	0.67	0.69	0.69	0.09	0.74	0.56	0.59	0.6	0.6	-0.07	-0.05	-0.06	0.11	0.13	0.12	0.6	0.004	0.005	0.003	0.004	0.409	0.614	0.064	0.559	0.528	0.539	0.005	0.004	0	0.022	0.028	0.035	0.614	intronic	UBE3A	.
16	53947509	rs9924877	G	A	0.4	0.71	0.43	0.36	0.08	0.37	0.68	0.63	0.35	0.29	0.34	0.06	0	0.03	-0.25	-0.32	0.63	0.094	0.136	0.007	0.208	0.561	0.216	0.178	0.613	0.266	0.192	0.205	0.005	0.005	0.004	0.114	0.182	0.613	intronic	FTO	.
6	34071374	rs9461952	G	C	0.69	0.42	0.66	0.76	0.15	0.81	0.47	0.27	0.51	0.61	-0.4	-0.15	-0.06	-0.06	0.19	0.29	0.61	0.097	0.116	0.015	0.218	0.215	0.613	0.221	0.166	0.422	0.532	0.291	0.049	0.005	0	0.071	0.157	0.613	intronic	GRM4	.
16	53903720	rs2111112	T	C	0.8	0.92	0.83	0.8	0.36	0.77	0.99	0.57	0.47	0.44	0.15	0.06	0.03	-0.06	-0.16	-0.19	0.57	0.025	0.039	0.001	0.065	0.612	0.295	0.191	0.497	0.376	0.321	0.081	0.004	0.004	0.037	0.121	0.152	0.612	intronic	FTO	.
7	80487613	rs10246832	T	G	0.86	0.86	0.87	0.84	0.2	0.85	0.85	0.65	0.66	0.63	0.01	0.02	-0.01	0.01	0.02	-0.01	0.66	0.003	0.005	0.002	0.004	0.587	0.585	0.005	0.593	0.611	0.586	0.005	0.003	0.004	0.006	0.003	0.004	0.611	intronic	GNAT3	.
17	33379839	rs8072171	C	T	0.68	0.92	0.65	0.72	0.25	0.63	0.89	0.68	0.4	0.47	0.3	0.02	0.09	0.03	-0.25	-0.18	0.68	0.068	0.163	0.006	0.108	0.596	0.255	0.175	0.61	0.275	0.352	0.194	0.003	0.012	0.003	0.145	0.089	0.61	intronic	ASIC2	.
10	112963195	rs6585195	G	C	0.33	0.63	0.36	0.26	0.64	0.09	0.75	-0.01	-0.29	-0.38	0.54	0.27	0.17	-0.12	-0.39	-0.48	0.54	0.115	0.136	0.02	0.251	0.021	0.487	0.61	0.005	0.146	0.259	0.501	0.171	0.082	0.025	0.258	0.382	0.61	intronic	TCF7L2	.
17	34065327	rs12602886	G	A	0.62	0.66	0.64	0.62	0.06	0.66	0.47	0.6	0.59	0.56	0	-0.02	-0.05	0.19	0.17	0.15	0.6	0.001	0.003	0.002	0.003	0.364	0.575	0.066	0.609	0.515	0.481	0.005	0.003	0.002	0.07	0.048	0.033	0.609	intronic	ASIC2	.
21	34949510	rs7281340	C	T	0.92	0.91	0.92	0.91	0.3	0.94	0.93	0.61	0.62	0.62	-0.04	-0.03	-0.03	-0.02	-0.02	-0.02	0.62	0.004	0.005	0.003	0.006	0.593	0.609	0.003	0.548	0.591	0.591	0.001	0.002	0.002	0.004	0.002	0.002	0.609	intronic	RUNX1	.
17	34033780	rs8075230	C	T	0.58	0.66	0.57	0.59	0.06	0.66	0.49	0.6	0.51	0.53	0	-0.09	-0.07	0.17	0.08	0.1	0.6	0.007	0.022	0.003	0.016	0.377	0.568	0.053	0.608	0.429	0.442	0.005	0.016	0.011	0.062	0.006	0.011	0.608	intronic	ASIC2	.
3	7037099	rs338080	T	C	0.41	0.68	0.36	0.41	0.06	0.5	0.54	0.62	0.3	0.35	0.18	-0.14	-0.09	0.14	-0.18	-0.14	0.62	0.083	0.185	0.004	0.125	0.435	0.39	0.002	0.608	0.212	0.267	0.056	0.04	0.012	0.03	0.068	0.031	0.608	intronic	GRM7	.
12	11015164	rs10845290	G	A	0.5	0.68	0.52	0.43	0.06	0.3	0.66	0.62	0.45	0.37	0.38	0.22	0.14	0.02	-0.15	-0.23	0.62	0.043	0.048	0.009	0.104	0.556	0.167	0.229	0.607	0.378	0.292	0.255	0.092	0.04	0.004	0.035	0.087	0.607	intronic	PRH1,PRR4	.
9	6568116	rs7859893	G	A	0.47	0.77	0.41	0.49	0.12	0.32	0.74	0.65	0.29	0.37	0.45	0.09	0.17	0.03	-0.33	-0.25	0.65	0.097	0.219	0.009	0.14	0.566	0.105	0.303	0.606	0.183	0.26	0.331	0.014	0.055	0.004	0.196	0.119	0.606	intronic	GLDC	.
16	23296594	rs2887481	G	A	0.51	0.35	0.53	0.52	0.01	0.62	0.44	0.33	0.52	0.5	-0.27	-0.09	-0.1	-0.09	0.09	0.08	0.52	0.026	0.057	0.003	0.054	0.41	0.605	0.061	0.347	0.457	0.445	0.143	0.018	0.019	0.014	0.009	0.007	0.605	intergenic	SCNN1G;SCNN1B	.
16	23299833	rs4967952	A	G	0.51	0.36	0.53	0.52	0.01	0.62	0.44	0.34	0.52	0.51	-0.27	-0.09	-0.1	-0.08	0.1	0.08	0.52	0.024	0.055	0.003	0.052	0.41	0.605	0.061	0.355	0.46	0.447	0.136	0.016	0.018	0.011	0.01	0.008	0.605	intergenic	SCNN1G;SCNN1B	.
16	23295427	rs4967996	C	T	0.51	0.36	0.53	0.51	0.01	0.62	0.44	0.34	0.52	0.5	-0.27	-0.09	-0.11	-0.08	0.09	0.07	0.52	0.022	0.053	0.003	0.046	0.41	0.605	0.061	0.355	0.457	0.438	0.136	0.018	0.022	0.011	0.009	0.005	0.605	intergenic	SCNN1G;SCNN1B	.
10	113155455	rs290483	G	T	0.72	0.86	0.69	0.68	0.25	0.58	0.91	0.6	0.44	0.43	0.28	0.11	0.1	-0.05	-0.21	-0.22	0.6	0.022	0.038	0.002	0.056	0.605	0.194	0.244	0.508	0.349	0.312	0.146	0.036	0.021	0.013	0.102	0.126	0.605	intronic	TCF7L2	.
7	22722557	rs17147230	T	A	0.31	0.56	0.39	0.18	0	0	0.53	0.56	0.39	0.18	0.56	0.39	0.18	0.03	-0.14	-0.35	0.56	0.133	0.049	0.098	0.277	0.533	0	0.522	0.604	0.349	0.15	0.591	0.34	0.146	0.005	0.038	0.246	0.604	intergenic	MGC87042(dist=222275),IL6(dist=4590)	.
15	25388176	rs12591773	C	T	0.69	0.67	0.69	0.67	0.08	0.73	0.57	0.59	0.6	0.58	-0.05	-0.04	-0.06	0.11	0.12	0.1	0.6	0.004	0.005	0.003	0.005	0.423	0.604	0.049	0.567	0.532	0.519	0.001	0.001	0.002	0.019	0.024	0.021	0.604	intronic	UBE3A	.
15	25350665	rs4445877	T	C	0.69	0.67	0.69	0.67	0.08	0.73	0.58	0.59	0.61	0.58	-0.05	-0.04	-0.06	0.09	0.11	0.09	0.61	0.004	0.004	0.003	0.005	0.439	0.604	0.04	0.567	0.536	0.519	0.001	0	0.002	0.013	0.019	0.015	0.604	intronic	UBE3A	.
17	34060589	rs2189328	A	T	0.62	0.64	0.64	0.62	0.06	0.66	0.47	0.59	0.59	0.56	-0.02	-0.02	-0.04	0.17	0.17	0.15	0.59	0.002	0.004	0.002	0	0.364	0.575	0.066	0.602	0.515	0.486	0.006	0.003	0.001	0.065	0.048	0.035	0.602	intronic	ASIC2	.
3	7021165	rs1391948	C	A	0.41	0.67	0.37	0.39	0.06	0.44	0.54	0.61	0.31	0.33	0.22	-0.08	-0.06	0.13	-0.17	-0.15	0.61	0.076	0.164	0.001	0.13	0.438	0.339	0.012	0.602	0.226	0.256	0.085	0.011	0.002	0.025	0.06	0.038	0.602	intronic	GRM7	.
7	45663899	rs2471264	A	G	0.7	0.56	0.75	0.7	0.09	0.68	0.36	0.47	0.66	0.62	-0.12	0.06	0.02	0.2	0.38	0.34	0.66	0.036	0.086	0.001	0.054	0.194	0.546	0.18	0.409	0.601	0.55	0.035	0.007	0.002	0.056	0.258	0.211	0.601	intronic	ADCY1	.
17	34033420	rs7502383	C	A	0.58	0.66	0.56	0.59	0.06	0.63	0.45	0.59	0.49	0.52	0.03	-0.07	-0.04	0.21	0.11	0.14	0.59	0.009	0.026	0.001	0.014	0.321	0.527	0.062	0.6	0.412	0.44	0.001	0.009	0.001	0.095	0.017	0.032	0.6	intronic	ASIC2	.
3	6882644	rs1240966	G	T	0.87	0.77	0.88	0.85	0.24	0.81	0.64	0.53	0.64	0.61	-0.05	0.07	0.03	0.12	0.24	0.21	0.64	0.018	0.047	0.001	0.021	0.283	0.497	0.068	0.429	0.6	0.554	0.003	0.014	0.001	0.028	0.151	0.11	0.6	intronic	GRM7	.
7	127088358	rs10954143	C	T	0.36	0.74	0.32	0.33	0.12	0.25	0.62	0.63	0.2	0.21	0.49	0.07	0.08	0.12	-0.3	-0.29	0.63	0.175	0.302	0.003	0.317	0.431	0.052	0.245	0.598	0.112	0.1	0.404	0.01	0.006	0.034	0.159	0.172	0.598	intronic	GRM8	.
1	167807833	rs10800327	G	A	0.39	0.55	0.38	0.36	0.02	0.39	0.63	0.53	0.36	0.34	0.15	-0.01	-0.03	-0.08	-0.24	-0.26	0.53	0.024	0.037	0.001	0.059	0.597	0.36	0.098	0.554	0.328	0.288	0.038	0.004	0.002	0.009	0.096	0.126	0.597	intergenic	MPZL1;ADCY10	.
17	34038126	rs4795847	G	C	0.58	0.71	0.56	0.59	0.1	0.66	0.56	0.61	0.46	0.49	0.05	-0.1	-0.08	0.15	0	0.03	0.61	0.021	0.054	0.002	0.04	0.388	0.508	0.018	0.597	0.367	0.389	0.004	0.019	0.01	0.052	0.004	0.003	0.597	intronic	ASIC2	.
16	54005019	rs6499663	G	A	0.64	0.33	0.69	0.68	0.83	0.44	0.17	-0.5	-0.13	-0.15	-0.11	0.25	0.24	0.16	0.52	0.51	0.52	0.119	0.234	0.002	0.202	0.597	0.274	0.153	0.413	0.042	0.059	0.021	0.12	0.096	0.059	0.424	0.389	0.597	intronic	FTO	.
8	72020024	rs66527710	T	C	0.87	0.99	0.89	0.84	0.37	0.81	0.99	0.62	0.52	0.47	0.18	0.08	0.03	0.01	-0.1	-0.14	0.62	0.036	0.058	0.004	0.089	0.597	0.325	0.155	0.562	0.457	0.394	0.137	0.021	0.001	0.006	0.066	0.099	0.597	ncRNA_intronic	LOC100132891	.
8	72021397	rs6996723	T	C	0.87	0.99	0.88	0.84	0.37	0.81	0.99	0.62	0.51	0.47	0.18	0.07	0.03	0.01	-0.1	-0.15	0.62	0.037	0.061	0.004	0.093	0.597	0.325	0.155	0.562	0.452	0.388	0.137	0.018	0	0.006	0.069	0.103	0.597	ncRNA_UTR3	TRPA1	.
17	3572270	rs224550	C	T	1	1	1	1	0.45	1	1	0.55	0.55	0.55	0	0	0	0	0	0	0.55	0	0	0	0	0.538	0.533	0	0.496	0.583	0.596	0	0	0	0	0	0	0.596	intronic	TRPV1	.
10	113081857	rs7915978	T	C	0.54	0.78	0.54	0.48	0.14	0.37	0.63	0.64	0.39	0.34	0.41	0.17	0.11	0.15	-0.09	-0.15	0.64	0.075	0.123	0.002	0.168	0.4	0.122	0.124	0.595	0.278	0.223	0.296	0.049	0.022	0.051	0.015	0.039	0.595	intronic	TCF7L2	.
7	80476938	rs7779247	C	T	0.86	0.86	0.86	0.84	0.22	0.83	0.85	0.64	0.65	0.63	0.02	0.03	0.01	0	0.01	-0.01	0.65	0.004	0.006	0.002	0.005	0.576	0.548	0.003	0.575	0.594	0.574	0.003	0.001	0.003	0.006	0.004	0.004	0.594	intronic	GNAT3	.
14	72432821	rs7160223	T	A	0.51	0.7	0.5	0.5	0.13	0.4	0.77	0.58	0.38	0.38	0.3	0.1	0.1	-0.07	-0.27	-0.27	0.58	0.021	0.044	0.003	0.05	0.594	0.181	0.241	0.487	0.278	0.268	0.126	0.018	0.016	0.02	0.131	0.137	0.594	intronic	RGS6	.
7	80519352	rs6467221	T	G	0.64	0.38	0.61	0.69	0.06	0.69	0.29	0.31	0.54	0.62	-0.31	-0.09	0	0.09	0.31	0.4	0.62	0.077	0.087	0.015	0.177	0.159	0.593	0.273	0.28	0.471	0.57	0.167	0.012	0.004	0.015	0.177	0.281	0.593	intergenic	GNAT3;CD36	.
7	45711910	rs185093225	A	G	0.7	0.63	0.75	0.67	0.09	0.39	0.32	0.54	0.66	0.58	0.24	0.36	0.28	0.32	0.43	0.35	0.66	0.008	0.02	0.009	0.003	0.14	0.214	0.007	0.526	0.593	0.509	0.111	0.226	0.147	0.186	0.309	0.223	0.593	intronic	ADCY1	.
3	7231227	rs1472912	A	G	0.47	0.55	0.48	0.5	0	0.4	0.5	0.54	0.47	0.5	0.15	0.08	0.1	0.05	-0.02	0.01	0.54	0.001	0.004	0.002	0.003	0.489	0.396	0.014	0.593	0.438	0.459	0.039	0.01	0.022	0	0.004	0.003	0.593	intronic	GRM7	.
21	34921312	rs35497104	C	T	0.42	0.59	0.39	0.37	0.01	0.45	0.57	0.58	0.37	0.35	0.14	-0.06	-0.08	0.02	-0.18	-0.2	0.58	0.032	0.061	0.003	0.071	0.545	0.428	0.023	0.593	0.326	0.306	0.023	0.004	0.008	0.006	0.06	0.07	0.593	intronic	RUNX1	.
21	34872168	rs4366984	A	G	0.76	0.91	0.77	0.75	0.25	0.76	0.84	0.66	0.52	0.5	0.15	0	-0.02	0.06	-0.08	-0.1	0.66	0.029	0.071	0.004	0.064	0.528	0.419	0.016	0.592	0.39	0.401	0.057	0.003	0.004	0.009	0.028	0.023	0.592	intronic	RUNX1	.
7	143450225	rs10228212	C	T	0.35	0.64	0.32	0.33	0.04	0.27	0.63	0.6	0.28	0.29	0.37	0.05	0.06	0.01	-0.31	-0.3	0.6	0.091	0.175	0.004	0.167	0.562	0.184	0.226	0.591	0.207	0.211	0.222	0	0.002	0.007	0.18	0.172	0.591	ncRNA_intronic	LOC285965	.
19	48746441	rs12975781	C	T	0.54	0.89	0.53	0.44	0.23	0.39	0.83	0.65	0.3	0.21	0.5	0.14	0.05	0.06	-0.29	-0.38	0.65	0.154	0.237	0.011	0.322	0.52	0.052	0.33	0.591	0.167	0.092	0.404	0.035	0.002	0.01	0.171	0.255	0.591	UTR5	IZUMO1	.
7	126705298	rs12706744	A	T	0.53	0.76	0.5	0.53	0.12	0.53	0.49	0.64	0.38	0.42	0.23	-0.03	0.01	0.27	0.01	0.04	0.64	0.052	0.126	0.003	0.079	0.283	0.324	0.003	0.59	0.262	0.321	0.093	0.001	0.004	0.121	0.004	0.001	0.59	intronic	GRM8	.
17	3572111	rs224549	C	T	1	1	1	1	0.46	1	1	0.54	0.54	0.54	0	0	0	0	0	0	0.54	0	0	0	0	0.534	0.529	0	0.492	0.58	0.59	0	0	0	0	0	0	0.59	intronic	TRPV1	.
1	248596802	rs28493221	C	T	0.99	1	1	0.99	0.44	1	1	0.56	0.56	0.55	0	0	-0.01	0	0	-0.01	0.56	0.002	0	0.003	0.001	0.546	0.541	0	0.501	0.588	0.587	0	0	0.001	0	0	0.001	0.588	intergenic	OR2T10;OR2T11	.
21	34870916	rs2268293	C	A	0.81	0.76	0.83	0.84	0.2	0.72	0.73	0.56	0.63	0.64	0.04	0.12	0.12	0.02	0.1	0.11	0.64	0.005	0.009	0.003	0.017	0.443	0.424	0.004	0.481	0.569	0.588	0.001	0.032	0.043	0.004	0.023	0.033	0.588	intronic	RUNX1	.
21	34946441	rs2834687	C	T	0.91	0.91	0.91	0.91	0.31	0.94	0.93	0.59	0.6	0.6	-0.04	-0.03	-0.03	-0.02	-0.02	-0.02	0.6	0.004	0.005	0.003	0.005	0.572	0.588	0.003	0.526	0.566	0.567	0.001	0.003	0.003	0.004	0.002	0.002	0.588	intronic	RUNX1	.
7	45708921	rs2248284	T	C	0.65	0.5	0.72	0.61	0.07	0.41	0.32	0.43	0.65	0.54	0.09	0.31	0.2	0.18	0.41	0.29	0.65	0.048	0.119	0.02	0.037	0.168	0.267	0.014	0.357	0.587	0.465	0.002	0.177	0.079	0.045	0.279	0.163	0.587	intronic	ADCY1	.
7	45703021	rs2461115	G	T	0.65	0.48	0.72	0.61	0.07	0.4	0.32	0.41	0.65	0.54	0.08	0.32	0.21	0.17	0.41	0.29	0.65	0.054	0.131	0.02	0.045	0.168	0.262	0.012	0.34	0.587	0.465	0.001	0.182	0.083	0.036	0.279	0.163	0.587	intronic	ADCY1	.
5	1408289	rs10074171	G	A	0.79	0.93	0.78	0.78	0.29	0.73	0.87	0.64	0.49	0.5	0.2	0.05	0.06	0.06	-0.1	-0.09	0.64	0.035	0.087	0.002	0.073	0.518	0.321	0.061	0.587	0.378	0.404	0.13	0	0.006	0.016	0.031	0.022	0.587	intronic	SLC6A3	.
10	113149972	rs290487	C	T	0.28	0.62	0.23	0.26	0.04	0.17	0.63	0.58	0.19	0.22	0.45	0.06	0.08	-0.01	-0.4	-0.37	0.58	0.147	0.271	0.002	0.243	0.565	0.09	0.35	0.587	0.132	0.148	0.344	0.005	0.013	0.005	0.282	0.255	0.587	intronic	TCF7L2	.
17	3572691	rs224551	G	A	1	1	1	1	0.46	1	1	0.54	0.54	0.54	0	0	0	0	0	0	0.54	0	0	0	0	0.529	0.524	0	0.487	0.575	0.587	0	0	0	0	0	0	0.587	intronic	TRPV1	.
3	7187182	rs2063880	A	G	0.47	0.62	0.48	0.47	0.04	0.28	0.63	0.58	0.45	0.43	0.34	0.21	0.19	-0.01	-0.14	-0.16	0.58	0.014	0.025	0.002	0.035	0.565	0.198	0.214	0.586	0.39	0.362	0.201	0.085	0.069	0.006	0.033	0.045	0.586	intronic	GRM7	.
3	7007289	rs338089	G	A	0.42	0.66	0.36	0.42	0.06	0.52	0.54	0.6	0.3	0.36	0.14	-0.16	-0.1	0.12	-0.18	-0.11	0.6	0.071	0.167	0.011	0.091	0.43	0.413	0.004	0.586	0.21	0.286	0.031	0.054	0.012	0.022	0.067	0.019	0.586	intronic	GRM7	.
15	40304360	rs4244575	C	G	0.4	0.72	0.46	0.35	0.14	0.18	0.79	0.58	0.31	0.21	0.54	0.28	0.17	-0.07	-0.33	-0.43	0.58	0.088	0.115	0.011	0.198	0.586	0.001	0.533	0.498	0.193	0.114	0.437	0.146	0.075	0.013	0.203	0.295	0.586	intronic	PLCB2	.
15	40296801	rs2229691	A	G	0.41	0.77	0.47	0.37	0.15	0.18	0.79	0.62	0.32	0.23	0.59	0.29	0.2	-0.03	-0.33	-0.42	0.62	0.105	0.152	0.009	0.23	0.585	0.002	0.546	0.54	0.191	0.119	0.495	0.155	0.089	0	0.205	0.288	0.585	exonic	PLCB2	synonymous
7	22717470	rs6461662	T	C	0.6	0.63	0.69	0.52	0.09	0.53	0.72	0.54	0.6	0.43	0.1	0.16	-0.01	-0.09	-0.03	-0.2	0.6	0.033	0	0.052	0.022	0.585	0.369	0.072	0.496	0.51	0.32	0.012	0.038	0.003	0.016	0.001	0.087	0.585	intergenic	MGC87042(dist=217188),IL6(dist=9677)	.
10	113150161	rs290485	A	T	0.3	0.63	0.25	0.28	0.04	0.17	0.64	0.59	0.21	0.24	0.46	0.08	0.11	-0.01	-0.38	-0.35	0.59	0.128	0.241	0.003	0.217	0.568	0.083	0.362	0.585	0.15	0.164	0.353	0.016	0.025	0.005	0.256	0.233	0.585	intronic	TCF7L2	.
19	33818372	rs29942	G	A	0.45	0.74	0.48	0.4	0.13	0.31	0.71	0.61	0.35	0.27	0.43	0.17	0.09	0.03	-0.24	-0.32	0.61	0.106	0.153	0.009	0.233	0.518	0.086	0.279	0.584	0.229	0.151	0.334	0.048	0.011	0	0.111	0.185	0.584	intergenic	KCTD15;LSM14A	.
1	18834189	rs80339882	C	T	0.21	0.67	0.16	0.15	0.06	0.1	0.44	0.61	0.09	0.09	0.57	0.06	0.05	0.24	-0.28	-0.28	0.61	0.297	0.442	0.003	0.452	0.311	0.004	0.246	0.584	0.034	0.031	0.515	0.008	0.007	0.091	0.18	0.188	0.584	intergenic	PAX7(dist=85323),TAS1R2(dist=5410)	.
17	34097000	rs2023867	A	C	0.63	0.63	0.66	0.63	0.06	0.68	0.47	0.57	0.6	0.57	-0.05	-0.02	-0.04	0.16	0.19	0.16	0.6	0.004	0.006	0.003	0.005	0.356	0.584	0.079	0.578	0.522	0.498	0.005	0.002	0.001	0.055	0.056	0.046	0.584	intronic	ASIC2	.
7	45699759	rs2471276	G	C	0.64	0.48	0.72	0.6	0.07	0.41	0.32	0.41	0.65	0.53	0.08	0.31	0.19	0.17	0.41	0.28	0.65	0.052	0.128	0.023	0.039	0.168	0.267	0.014	0.34	0.583	0.454	0.002	0.173	0.072	0.036	0.275	0.153	0.583	intronic	ADCY1	.
17	33050525	rs16581	G	A	0.29	0.54	0.23	0.28	0	0.16	0.5	0.54	0.23	0.28	0.38	0.07	0.12	0.04	-0.26	-0.21	0.54	0.08	0.182	0.008	0.107	0.499	0.163	0.219	0.583	0.2	0.255	0.264	0.009	0.041	0.004	0.146	0.08	0.583	intronic	ASIC2	.
19	48747376	rs28400015	G	A	0.55	0.89	0.54	0.46	0.23	0.42	0.83	0.65	0.31	0.23	0.47	0.12	0.04	0.06	-0.29	-0.37	0.65	0.14	0.222	0.008	0.297	0.52	0.073	0.296	0.583	0.173	0.104	0.36	0.024	0.001	0.006	0.164	0.239	0.583	upstream;downstream	IZUMO1;FUT1	.
7	45694897	rs2461123	C	A	0.63	0.48	0.72	0.59	0.07	0.4	0.32	0.42	0.65	0.52	0.08	0.31	0.19	0.17	0.4	0.28	0.65	0.049	0.121	0.022	0.036	0.176	0.27	0.012	0.35	0.582	0.454	0.001	0.171	0.071	0.036	0.266	0.147	0.582	intronic	ADCY1	.
7	126733524	rs11978951	G	A	0.47	0.74	0.45	0.43	0.11	0.37	0.5	0.63	0.34	0.32	0.37	0.07	0.06	0.25	-0.05	-0.06	0.63	0.077	0.158	0.003	0.149	0.296	0.17	0.024	0.582	0.219	0.225	0.223	0.003	0.006	0.104	0.003	0.001	0.582	intronic	GRM8	.
7	126673324	rs1419493	A	T	0.46	0.73	0.45	0.43	0.11	0.34	0.49	0.63	0.34	0.32	0.39	0.1	0.09	0.25	-0.04	-0.05	0.63	0.074	0.147	0.003	0.148	0.293	0.147	0.036	0.582	0.229	0.225	0.249	0.014	0.014	0.106	0	0.001	0.582	intronic	GRM8	.
7	126706897	rs7784073	G	A	0.46	0.73	0.44	0.43	0.11	0.37	0.52	0.63	0.34	0.32	0.36	0.07	0.06	0.21	-0.08	-0.09	0.63	0.073	0.153	0.003	0.139	0.335	0.177	0.04	0.582	0.222	0.234	0.215	0.002	0.006	0.075	0.013	0.008	0.582	intronic	GRM8	.
7	126706839	rs886176	C	T	0.47	0.74	0.44	0.43	0.11	0.37	0.48	0.63	0.33	0.32	0.37	0.07	0.06	0.26	-0.04	-0.05	0.63	0.078	0.161	0.003	0.149	0.28	0.17	0.018	0.582	0.216	0.225	0.223	0.002	0.005	0.117	0.001	0.001	0.582	intronic	GRM8	.
16	54091128	rs708250	A	G	0.89	0.87	0.86	0.91	0.4	0.99	0.96	0.47	0.47	0.51	-0.12	-0.13	-0.08	-0.09	-0.09	-0.05	0.51	0.001	0.005	0.004	0.001	0.519	0.581	0.025	0.372	0.392	0.461	0.126	0.101	0.066	0.041	0.041	0.015	0.581	intronic	FTO	.
7	127068600	rs1419444	T	C	0.34	0.59	0.33	0.33	0.03	0.23	0.53	0.56	0.3	0.3	0.36	0.1	0.1	0.06	-0.21	-0.2	0.56	0.073	0.132	0.003	0.147	0.475	0.155	0.177	0.581	0.238	0.219	0.249	0.022	0.015	0.002	0.078	0.09	0.581	intronic	GRM8	.
14	72453899	rs4903024	C	T	0.25	0.54	0.19	0.26	0.03	0.36	0.63	0.51	0.16	0.23	0.18	-0.17	-0.1	-0.09	-0.44	-0.37	0.51	0.105	0.229	0.012	0.135	0.581	0.303	0.129	0.503	0.105	0.169	0.043	0.076	0.022	0.02	0.347	0.247	0.581	intronic	RGS6	.
3	7750857	rs9828468	A	C	0.82	0.82	0.87	0.76	0.23	0.75	0.86	0.59	0.64	0.53	0.07	0.11	0.01	-0.05	0	-0.1	0.64	0.016	0	0.028	0.005	0.572	0.425	0.035	0.513	0.58	0.44	0.01	0.037	0.003	0.001	0.005	0.027	0.58	intergenic	GRM7;LOC101927394	.
14	72501215	rs28499014	T	A	0.85	0.92	0.84	0.83	0.33	0.95	0.93	0.59	0.51	0.5	-0.03	-0.11	-0.12	-0.02	-0.09	-0.11	0.59	0.01	0.017	0.001	0.029	0.556	0.58	0.002	0.519	0.45	0.419	0.001	0.044	0.059	0.005	0.027	0.041	0.58	intronic	RGS6	.
14	72448097	rs7143134	C	A	0.61	0.7	0.59	0.61	0.19	0.69	0.83	0.5	0.4	0.42	0.01	-0.09	-0.07	-0.14	-0.24	-0.22	0.5	0.001	0.002	0.003	0	0.58	0.394	0.054	0.37	0.287	0.295	0.005	0.011	0.008	0.074	0.116	0.109	0.58	intronic	RGS6	.
21	34858878	rs7283251	T	C	0.82	0.87	0.82	0.83	0.23	0.78	0.85	0.64	0.59	0.6	0.09	0.04	0.05	0.02	-0.03	-0.02	0.64	0.002	0.01	0.002	0.002	0.558	0.463	0.012	0.58	0.504	0.537	0.024	0.002	0.005	0.004	0.002	0.002	0.58	intronic	RUNX1	.
7	80480522	rs12666211	G	A	0.86	0.86	0.87	0.85	0.24	0.83	0.85	0.62	0.63	0.61	0.02	0.03	0.01	0	0.01	-0.01	0.63	0.003	0.005	0.002	0.005	0.548	0.518	0.003	0.545	0.579	0.552	0.003	0.001	0.003	0.006	0.003	0.004	0.579	intronic	GNAT3	.
21	34856063	rs2834651	C	T	0.79	0.86	0.82	0.79	0.22	0.64	0.84	0.64	0.59	0.57	0.23	0.18	0.15	0.02	-0.02	-0.05	0.64	0.003	0.005	0.002	0.013	0.551	0.296	0.098	0.577	0.515	0.488	0.12	0.071	0.055	0.004	0.001	0.004	0.577	intronic	RUNX1	.
17	3595117	rs1018187	G	A	0.71	0.8	0.68	0.74	0.17	0.74	0.79	0.64	0.51	0.57	0.06	-0.06	-0.01	0.01	-0.11	-0.06	0.64	0.013	0.036	0.005	0.008	0.56	0.5	0.001	0.577	0.404	0.477	0.003	0.007	0.004	0.006	0.031	0.006	0.577	intronic	TRPV1	.
17	3597317	rs733080	C	T	0.71	0.8	0.69	0.74	0.17	0.75	0.79	0.64	0.52	0.57	0.06	-0.06	-0.01	0.01	-0.1	-0.06	0.64	0.011	0.031	0.003	0.008	0.56	0.506	0	0.577	0.414	0.477	0.001	0.006	0.004	0.006	0.027	0.006	0.577	intronic	TRPV1	.
4	26471598	rs3113032	G	A	0.7	0.48	0.75	0.7	0.15	0.78	0.44	0.34	0.6	0.55	-0.3	-0.03	-0.08	0.05	0.32	0.26	0.6	0.069	0.154	0.004	0.099	0.18	0.576	0.219	0.226	0.529	0.461	0.186	0.002	0.013	0.004	0.187	0.129	0.576	intergenic	RBPJ;CCKAR	.
7	45660858	rs2461134	C	T	0.66	0.52	0.71	0.67	0.08	0.65	0.29	0.43	0.63	0.59	-0.14	0.06	0.02	0.23	0.43	0.38	0.63	0.042	0.101	0.002	0.059	0.125	0.519	0.233	0.363	0.575	0.515	0.045	0.007	0.003	0.081	0.313	0.253	0.575	intronic	ADCY1	.
7	126519156	rs2237736	G	A	0.42	0.55	0.4	0.43	0.01	0.31	0.29	0.54	0.39	0.42	0.24	0.09	0.12	0.26	0.11	0.14	0.54	0.013	0.037	0.001	0.019	0.265	0.292	0.004	0.575	0.344	0.37	0.102	0.012	0.027	0.123	0.022	0.039	0.575	intronic	GRM8	.
7	126514182	rs2283065	T	C	0.42	0.55	0.4	0.43	0.01	0.31	0.29	0.54	0.39	0.42	0.24	0.09	0.12	0.26	0.12	0.14	0.54	0.012	0.034	0.002	0.02	0.265	0.292	0.004	0.575	0.348	0.37	0.102	0.014	0.027	0.123	0.024	0.039	0.575	intronic	GRM8	.
14	72437998	rs2283382	T	A	0.27	0.57	0.23	0.26	0.04	0.35	0.64	0.53	0.19	0.23	0.21	-0.13	-0.09	-0.07	-0.41	-0.37	0.53	0.098	0.206	0.002	0.149	0.575	0.278	0.143	0.513	0.124	0.164	0.064	0.04	0.014	0.012	0.304	0.243	0.575	intronic	RGS6	.
3	7736957	rs7636477	A	C	0.98	0.93	0.97	0.98	0.43	0.94	0.95	0.51	0.55	0.55	-0.01	0.03	0.04	-0.02	0.02	0.03	0.55	0.008	0.012	0.003	0.02	0.481	0.457	0.004	0.429	0.553	0.574	0.006	0.01	0.017	0.004	0.002	0.007	0.574	intronic	GRM7	.
7	126687345	rs1008907	C	A	0.46	0.73	0.44	0.44	0.11	0.37	0.49	0.62	0.34	0.33	0.35	0.07	0.06	0.24	-0.05	-0.05	0.62	0.07	0.146	0.003	0.132	0.298	0.177	0.022	0.574	0.222	0.234	0.207	0.002	0.006	0.096	0.003	0	0.574	intronic	GRM8	.
7	127049547	rs10256057	C	T	0.34	0.58	0.32	0.33	0.03	0.23	0.54	0.55	0.29	0.29	0.36	0.09	0.1	0.04	-0.22	-0.22	0.55	0.072	0.131	0.003	0.146	0.486	0.155	0.186	0.574	0.232	0.214	0.241	0.019	0.013	0.001	0.09	0.103	0.574	intronic	GRM8	.
7	126639354	rs10954128	C	T	0.44	0.6	0.42	0.42	0.03	0.32	0.38	0.57	0.39	0.39	0.28	0.1	0.1	0.22	0.05	0.04	0.57	0.024	0.054	0.003	0.051	0.31	0.255	0.001	0.574	0.324	0.321	0.131	0.014	0.016	0.081	0.001	0.001	0.574	intronic	GRM8	.
7	126613649	rs12540490	G	A	0.44	0.6	0.43	0.42	0.03	0.32	0.38	0.57	0.4	0.39	0.28	0.1	0.1	0.22	0.05	0.04	0.57	0.023	0.051	0.003	0.049	0.31	0.255	0.001	0.574	0.327	0.324	0.131	0.016	0.017	0.081	0.001	0	0.574	intronic	GRM8	.
7	126931347	rs2518954	C	G	0.46	0.64	0.43	0.45	0.06	0.28	0.67	0.58	0.37	0.39	0.36	0.15	0.16	-0.03	-0.24	-0.22	0.58	0.03	0.071	0.002	0.051	0.574	0.159	0.257	0.548	0.281	0.306	0.202	0.036	0.053	0.001	0.113	0.089	0.574	intronic	GRM8	.
7	126618915	rs4534074	C	T	0.44	0.6	0.43	0.43	0.03	0.32	0.38	0.57	0.4	0.4	0.28	0.1	0.11	0.22	0.05	0.05	0.57	0.022	0.051	0.003	0.044	0.31	0.255	0.001	0.574	0.327	0.334	0.131	0.016	0.021	0.081	0.001	0.002	0.574	intronic	GRM8	.
7	126706505	rs756900	C	T	0.47	0.73	0.45	0.44	0.11	0.37	0.49	0.62	0.34	0.33	0.36	0.08	0.07	0.24	-0.04	-0.05	0.62	0.07	0.147	0.003	0.133	0.291	0.17	0.022	0.574	0.223	0.234	0.215	0.004	0.008	0.102	0.001	0.001	0.574	intronic	GRM8	.
7	127033920	rs929173	C	G	0.34	0.58	0.32	0.33	0.03	0.23	0.54	0.55	0.29	0.3	0.36	0.09	0.1	0.04	-0.22	-0.21	0.55	0.071	0.131	0.003	0.142	0.48	0.155	0.182	0.574	0.232	0.219	0.241	0.019	0.015	0	0.086	0.095	0.574	intronic	GRM8	.
19	48746186	rs12975033	A	T	0.55	0.87	0.54	0.46	0.23	0.42	0.83	0.64	0.31	0.23	0.45	0.12	0.04	0.05	-0.28	-0.37	0.64	0.136	0.21	0.01	0.291	0.52	0.073	0.296	0.574	0.177	0.102	0.35	0.025	0.001	0.003	0.161	0.241	0.574	intronic	IZUMO1	.
17	3603073	rs161372	T	G	0.55	0.61	0.49	0.55	0.09	0.64	0.71	0.52	0.4	0.46	-0.04	-0.15	-0.09	-0.1	-0.22	-0.16	0.52	0.005	0.019	0	0.004	0.574	0.5	0.006	0.488	0.324	0.364	0.005	0.034	0.015	0.015	0.08	0.051	0.574	intronic	TRPV1	.
3	7734731	rs1847434	G	A	0.82	0.81	0.87	0.76	0.24	0.74	0.86	0.57	0.63	0.53	0.07	0.12	0.02	-0.05	0.01	-0.1	0.63	0.014	0.002	0.026	0.002	0.56	0.406	0.038	0.498	0.573	0.438	0.01	0.042	0.002	0	0.005	0.022	0.573	intronic	GRM7	.
3	7487109	rs62233412	G	C	0.27	0.53	0.28	0.22	0.03	0.23	0.63	0.5	0.24	0.19	0.3	0.05	-0.01	-0.1	-0.35	-0.41	0.5	0.085	0.123	0.004	0.183	0.573	0.155	0.275	0.508	0.186	0.136	0.175	0.002	0.004	0.014	0.218	0.285	0.573	intronic	GRM7	.
3	7737908	rs7653428	C	T	0.82	0.82	0.87	0.77	0.24	0.75	0.86	0.58	0.63	0.53	0.07	0.12	0.02	-0.04	0.01	-0.09	0.63	0.013	0	0.024	0.003	0.56	0.413	0.034	0.507	0.573	0.443	0.012	0.039	0.002	0.003	0.005	0.02	0.573	intronic	GRM7	.
7	127132548	rs6950264	A	G	0.49	0.8	0.49	0.45	0.18	0.3	0.69	0.63	0.32	0.27	0.51	0.19	0.15	0.11	-0.2	-0.24	0.63	0.11	0.169	0.007	0.239	0.422	0.036	0.262	0.573	0.207	0.139	0.409	0.081	0.036	0.032	0.062	0.117	0.573	intronic	GRM8	.
17	33059876	rs144189619	G	A	0.28	0.54	0.22	0.28	0	0.16	0.5	0.53	0.22	0.27	0.38	0.06	0.12	0.04	-0.27	-0.22	0.53	0.083	0.187	0.008	0.112	0.489	0.15	0.219	0.572	0.187	0.242	0.264	0.008	0.039	0.004	0.15	0.084	0.572	intronic	ASIC2	.
7	80516432	rs6467219	A	C	0.63	0.39	0.6	0.68	0.08	0.69	0.29	0.31	0.52	0.6	-0.31	-0.09	-0.02	0.1	0.31	0.38	0.6	0.067	0.078	0.012	0.157	0.137	0.571	0.273	0.26	0.447	0.538	0.16	0.013	0.004	0.018	0.173	0.267	0.571	intergenic	GNAT3;CD36	.
6	34015863	rs6457754	C	T	0.97	1	0.98	0.96	0.42	0.95	0.95	0.58	0.56	0.55	0.05	0.03	0.01	0.05	0.03	0.02	0.58	0.008	0.013	0	0.023	0.482	0.484	0.005	0.534	0.571	0.551	0.038	0.006	0.002	0.04	0.008	0.001	0.571	intergenic	MIR1275;GRM4	.
6	34015176	rs9469672	C	T	0.97	1	0.98	0.96	0.42	0.95	0.95	0.58	0.56	0.54	0.05	0.03	0.01	0.05	0.03	0.01	0.58	0.009	0.013	0.001	0.025	0.482	0.484	0.005	0.534	0.571	0.543	0.038	0.006	0.003	0.04	0.008	0.003	0.571	intergenic	MIR1275;GRM4	.
21	34816191	rs7280608	T	C	0.94	0.99	0.94	0.93	0.42	0.98	1	0.57	0.52	0.51	0.01	-0.05	-0.06	-0.01	-0.06	-0.07	0.57	0.012	0.033	0.003	0.035	0.571	0.54	0.011	0.519	0.484	0.483	0.003	0.025	0.027	0.003	0.052	0.054	0.571	intronic	RUNX1	.
7	45718207	rs2461127	G	A	0.64	0.48	0.72	0.59	0.07	0.38	0.32	0.41	0.64	0.52	0.11	0.34	0.21	0.16	0.4	0.27	0.64	0.048	0.117	0.022	0.034	0.173	0.235	0.003	0.34	0.571	0.444	0.006	0.193	0.088	0.033	0.256	0.14	0.571	UTR3	ADCY1	.
19	9203924	rs10405250	A	C	0.7	0.71	0.75	0.74	0.23	0.86	0.72	0.49	0.52	0.51	-0.15	-0.11	-0.12	-0.01	0.03	0.02	0.52	0.003	0.002	0.003	0.003	0.388	0.57	0.053	0.373	0.42	0.409	0.064	0.034	0.038	0.006	0.002	0.003	0.57	intergenic	OR7D2;OR7D4	.
19	9205133	rs56742042	G	A	0.7	0.72	0.74	0.74	0.23	0.86	0.71	0.49	0.51	0.51	-0.14	-0.12	-0.12	0.01	0.03	0.03	0.51	0.004	0.005	0.003	0.003	0.376	0.57	0.059	0.381	0.404	0.414	0.059	0.041	0.037	0.006	0.003	0.001	0.57	intergenic	OR7D2;OR7D4	.
7	80475233	rs11760281	A	G	0.57	0.37	0.55	0.61	0.08	0.7	0.26	0.29	0.46	0.53	-0.33	-0.15	-0.09	0.11	0.29	0.35	0.53	0.042	0.043	0.01	0.102	0.098	0.57	0.321	0.236	0.368	0.453	0.18	0.047	0.009	0.029	0.145	0.226	0.57	intronic	GNAT3	.
21	34869632	rs2252585	C	T	0.82	0.77	0.84	0.84	0.21	0.72	0.73	0.56	0.63	0.63	0.05	0.12	0.12	0.04	0.11	0.11	0.63	0.003	0.008	0.003	0.01	0.425	0.412	0.004	0.478	0.566	0.57	0.001	0.036	0.039	0.001	0.03	0.032	0.57	intronic	RUNX1	.
17	33061971	rs199634285	G	T	0.28	0.52	0.23	0.28	0	0.16	0.5	0.52	0.23	0.28	0.36	0.07	0.12	0.03	-0.27	-0.21	0.52	0.075	0.172	0.009	0.096	0.499	0.163	0.219	0.569	0.196	0.255	0.248	0.008	0.041	0.005	0.15	0.08	0.569	intronic	ASIC2	.
3	7738122	rs7616913	T	G	0.82	0.83	0.87	0.77	0.24	0.75	0.86	0.59	0.63	0.53	0.08	0.12	0.03	-0.04	0	-0.09	0.63	0.012	0.002	0.021	0.004	0.561	0.406	0.038	0.509	0.569	0.446	0.015	0.04	0.001	0.003	0.005	0.02	0.569	intronic	GRM7	.
17	3597216	rs2277675	C	T	0.71	0.8	0.68	0.74	0.17	0.75	0.79	0.64	0.52	0.57	0.06	-0.06	-0.01	0.01	-0.11	-0.06	0.64	0.01	0.029	0.005	0.005	0.56	0.506	0	0.569	0.41	0.481	0.001	0.007	0.004	0.007	0.028	0.005	0.569	intronic	TRPV1	.
17	3610425	rs465563	G	A	0.52	0.61	0.45	0.52	0.09	0.64	0.7	0.52	0.37	0.43	-0.03	-0.18	-0.12	-0.1	-0.25	-0.18	0.52	0.013	0.037	0.002	0.013	0.569	0.494	0.005	0.488	0.284	0.334	0.005	0.053	0.025	0.013	0.105	0.067	0.569	UTR3	SHPK	.
7	45710088	rs2461112	C	G	0.65	0.48	0.73	0.6	0.09	0.4	0.32	0.4	0.64	0.51	0.08	0.32	0.2	0.17	0.41	0.28	0.64	0.054	0.131	0.024	0.039	0.147	0.238	0.012	0.313	0.568	0.435	0.001	0.182	0.076	0.036	0.279	0.153	0.568	intronic	ADCY1	.
7	45712398	rs4436025	T	C	0.65	0.48	0.72	0.61	0.09	0.38	0.32	0.4	0.64	0.52	0.1	0.34	0.22	0.17	0.41	0.29	0.64	0.054	0.131	0.021	0.043	0.147	0.217	0.006	0.313	0.568	0.443	0.005	0.203	0.097	0.036	0.279	0.16	0.568	intronic	ADCY1	.
21	34817556	rs28690393	A	G	0.98	1	1	0.97	0.46	0.99	1	0.54	0.54	0.5	0.01	0.01	-0.03	0	0	-0.03	0.54	0.019	0.003	0.019	0.018	0.529	0.515	0	0.487	0.568	0.517	0.002	0.004	0.013	0	0.001	0.022	0.568	intronic	RUNX1	.
17	33418143	rs4795781	T	C	0.23	0.68	0.19	0.21	0.08	0.12	0.6	0.6	0.11	0.13	0.57	0.07	0.09	0.08	-0.42	-0.39	0.6	0.24	0.399	0.002	0.369	0.468	0.003	0.403	0.567	0.042	0.056	0.498	0.013	0.024	0.003	0.314	0.286	0.567	intronic	ASIC2	.
3	7734952	rs6808050	T	G	0.82	0.82	0.87	0.77	0.24	0.74	0.86	0.58	0.63	0.53	0.08	0.12	0.03	-0.04	0.01	-0.09	0.63	0.013	0	0.023	0.003	0.554	0.4	0.038	0.5	0.567	0.439	0.014	0.042	0.001	0.003	0.005	0.02	0.567	intronic	GRM7	.
7	80516910	rs6467220	C	T	0.63	0.39	0.6	0.67	0.08	0.69	0.29	0.32	0.52	0.59	-0.29	-0.08	-0.01	0.1	0.31	0.38	0.59	0.066	0.078	0.011	0.153	0.137	0.566	0.267	0.26	0.447	0.535	0.155	0.011	0.004	0.018	0.173	0.263	0.566	intergenic	GNAT3;CD36	.
7	127147073	rs1858784	G	A	0.38	0.7	0.33	0.35	0.11	0.3	0.65	0.59	0.22	0.24	0.41	0.03	0.05	0.06	-0.32	-0.29	0.59	0.133	0.245	0.003	0.245	0.466	0.099	0.212	0.566	0.129	0.127	0.295	0	0.001	0.006	0.169	0.17	0.566	intronic	GRM8	.
21	34830143	rs2243988	T	C	0.57	0.55	0.53	0.56	0.05	0.65	0.6	0.49	0.48	0.51	-0.1	-0.12	-0.09	-0.06	-0.07	-0.05	0.51	0.002	0.004	0	0.005	0.515	0.566	0	0.491	0.404	0.44	0.013	0.026	0.01	0.001	0.009	0.001	0.566	intronic	RUNX1	.
6	34017372	rs9461943	C	T	0.97	1	0.98	0.96	0.42	0.95	0.95	0.58	0.56	0.54	0.05	0.03	0.01	0.05	0.03	0.01	0.58	0.009	0.013	0.001	0.025	0.477	0.479	0.005	0.529	0.565	0.538	0.038	0.006	0.003	0.04	0.008	0.003	0.565	intergenic	MIR1275;GRM4	.
6	34017483	rs9469679	C	T	0.97	1	0.98	0.96	0.42	0.95	0.95	0.58	0.56	0.54	0.05	0.03	0.01	0.05	0.03	0.01	0.58	0.009	0.013	0.001	0.025	0.477	0.479	0.005	0.529	0.565	0.537	0.038	0.006	0.003	0.04	0.008	0.003	0.565	intergenic	MIR1275;GRM4	.
21	34841582	rs2284612	T	C	0.56	0.61	0.53	0.57	0.06	0.64	0.6	0.56	0.48	0.51	-0.02	-0.1	-0.07	0.02	-0.06	-0.03	0.56	0.004	0.015	0.002	0.001	0.502	0.547	0.001	0.565	0.4	0.449	0.006	0.02	0.002	0.003	0.006	0.003	0.565	intronic	RUNX1	.
7	45713321	rs2250129	A	G	0.64	0.48	0.72	0.59	0.09	0.38	0.32	0.4	0.64	0.5	0.1	0.34	0.2	0.17	0.41	0.27	0.64	0.053	0.127	0.028	0.033	0.147	0.217	0.006	0.313	0.564	0.422	0.005	0.199	0.083	0.036	0.274	0.142	0.564	intronic	ADCY1	.
7	45682320	rs4724425	T	C	0.72	0.53	0.77	0.75	0.14	0.69	0.38	0.39	0.63	0.61	-0.16	0.08	0.06	0.15	0.39	0.37	0.63	0.073	0.147	0.002	0.125	0.135	0.473	0.17	0.272	0.564	0.537	0.063	0.013	0.006	0.025	0.273	0.248	0.564	intronic	ADCY1	.
3	7152169	rs7623595	G	A	0.46	0.61	0.42	0.48	0.04	0.43	0.59	0.57	0.38	0.44	0.18	-0.01	0.05	0.01	-0.18	-0.12	0.57	0.019	0.051	0.002	0.023	0.529	0.358	0.047	0.564	0.32	0.365	0.045	0.004	0.001	0.006	0.053	0.025	0.564	intronic	GRM7	.
3	7740684	rs9826579	C	T	0.82	0.82	0.86	0.76	0.24	0.75	0.86	0.58	0.62	0.53	0.07	0.11	0.02	-0.04	0	-0.09	0.62	0.012	0.002	0.021	0.003	0.56	0.413	0.034	0.507	0.564	0.44	0.012	0.034	0.003	0.003	0.005	0.021	0.564	UTR3	GRM7	.
19	33816097	rs40815	A	G	0.48	0.74	0.5	0.41	0.14	0.32	0.72	0.6	0.35	0.27	0.42	0.17	0.09	0.02	-0.22	-0.31	0.6	0.097	0.128	0.013	0.217	0.503	0.083	0.267	0.563	0.238	0.147	0.315	0.055	0.01	0.002	0.093	0.175	0.563	downstream	KCTD15	.
19	33819129	rs29940	A	G	0.45	0.74	0.48	0.4	0.14	0.31	0.71	0.6	0.34	0.25	0.43	0.17	0.09	0.03	-0.23	-0.32	0.6	0.105	0.144	0.012	0.231	0.497	0.071	0.279	0.563	0.221	0.136	0.334	0.055	0.011	0	0.103	0.183	0.563	intergenic	KCTD15;LSM14A	.
19	33818627	rs29941	G	A	0.45	0.74	0.48	0.39	0.14	0.31	0.71	0.6	0.33	0.24	0.43	0.17	0.08	0.03	-0.24	-0.33	0.6	0.11	0.153	0.012	0.241	0.497	0.071	0.279	0.563	0.21	0.128	0.334	0.048	0.008	0	0.111	0.193	0.563	intergenic	KCTD15;LSM14A	.
7	22719988	rs1880242	T	G	0.6	0.62	0.7	0.52	0.09	0.53	0.7	0.53	0.61	0.44	0.1	0.17	0	-0.08	0	-0.18	0.61	0.032	0.004	0.053	0.015	0.563	0.369	0.057	0.488	0.522	0.33	0.009	0.045	0.004	0.011	0.003	0.065	0.563	intergenic	MGC87042(dist=219706),IL6(dist=7159)	.
17	33010552	rs28739	T	A	0.86	0.96	0.86	0.88	0.38	0.9	0.97	0.58	0.48	0.5	0.06	-0.04	-0.02	-0.01	-0.11	-0.09	0.58	0.017	0.046	0.003	0.04	0.563	0.453	0.033	0.521	0.413	0.43	0.022	0.002	0	0.005	0.06	0.053	0.563	intergenic	SPACA3;ASIC2	.
14	72440492	rs2238188	G	A	0.26	0.57	0.21	0.26	0.03	0.33	0.62	0.54	0.18	0.23	0.24	-0.12	-0.06	-0.05	-0.41	-0.35	0.54	0.108	0.23	0.008	0.15	0.563	0.261	0.149	0.523	0.116	0.171	0.084	0.037	0.006	0.005	0.306	0.224	0.563	intronic	RGS6	.
12	88046899	rs9262	G	C	0.62	0.7	0.59	0.64	0.14	0.6	0.77	0.56	0.44	0.5	0.1	-0.01	0.04	-0.06	-0.18	-0.12	0.56	0.003	0.012	0.001	0.001	0.562	0.366	0.058	0.481	0.351	0.402	0.011	0.005	0	0.01	0.057	0.03	0.562	exonic	C12orf29	nonsynonymous SNV
9	6652634	rs79584894	A	C	0.99	1	1	0.99	0.42	0.95	0.78	0.58	0.58	0.58	0.05	0.05	0.05	0.22	0.22	0.22	0.58	0.001	0	0.004	0.006	0.232	0.484	0.112	0.459	0.562	0.559	0.021	0.044	0.024	0.14	0.209	0.196	0.562	intergenic	GLDC;KDM4C	.
12	88050815	rs2468240	G	A	0.62	0.7	0.58	0.64	0.14	0.6	0.77	0.55	0.44	0.5	0.1	-0.02	0.04	-0.07	-0.18	-0.13	0.55	0.003	0.011	0.002	0.002	0.562	0.366	0.058	0.473	0.346	0.402	0.008	0.004	0	0.012	0.06	0.03	0.562	intronic	CEP290	.
12	88069674	rs2471503	T	C	0.63	0.7	0.59	0.65	0.14	0.63	0.77	0.56	0.44	0.5	0.07	-0.04	0.02	-0.06	-0.18	-0.12	0.56	0.004	0.012	0.003	0.002	0.562	0.401	0.038	0.481	0.35	0.412	0.001	0.002	0.003	0.01	0.058	0.026	0.562	intronic	CEP290	.
3	7728460	rs162722	C	T	0.81	0.83	0.86	0.74	0.25	0.75	0.87	0.58	0.61	0.49	0.08	0.11	-0.01	-0.04	-0.01	-0.13	0.61	0.023	0.004	0.036	0.017	0.562	0.4	0.042	0.503	0.553	0.393	0.015	0.034	0.004	0.001	0.004	0.044	0.562	intronic	GRM7	.
12	6343335	rs4149618	A	G	0.95	0.95	0.98	0.95	0.43	0.99	0.9	0.52	0.55	0.53	-0.05	-0.02	-0.04	0.04	0.07	0.05	0.55	0.001	0.005	0.003	0.005	0.401	0.553	0.078	0.45	0.561	0.528	0.036	0.007	0.022	0.01	0.047	0.018	0.561	intergenic	TNFRSF1A;SCNN1A	.
15	25342844	rs1557872	G	T	0.94	1	0.96	0.91	0.43	0.87	1	0.57	0.53	0.48	0.13	0.09	0.04	0	-0.04	-0.09	0.57	0.023	0.032	0.004	0.056	0.561	0.341	0.129	0.52	0.501	0.447	0.109	0.036	0.008	0	0.039	0.066	0.561	intronic	UBE3A	.
17	33178218	rs319780	A	G	0.49	0.64	0.52	0.49	0.07	0.33	0.55	0.57	0.44	0.42	0.32	0.19	0.16	0.09	-0.04	-0.06	0.57	0.02	0.024	0.002	0.052	0.422	0.182	0.093	0.56	0.378	0.32	0.188	0.078	0.044	0.015	0.003	0.006	0.56	intronic	ASIC2	.
17	3611395	rs410636	C	G	0.52	0.6	0.46	0.52	0.1	0.64	0.71	0.5	0.36	0.42	-0.04	-0.18	-0.12	-0.11	-0.25	-0.19	0.5	0.011	0.031	0.001	0.011	0.56	0.479	0.007	0.464	0.274	0.32	0.004	0.05	0.025	0.018	0.107	0.07	0.56	intronic	SHPK	.
15	40314667	rs4923863	A	G	0.17	0.61	0.15	0.1	0.05	0.04	0.6	0.56	0.1	0.05	0.58	0.12	0.07	0.01	-0.45	-0.5	0.58	0.273	0.353	0.009	0.455	0.515	0.002	0.534	0.536	0.052	0.015	0.559	0.071	0.029	0.006	0.354	0.446	0.559	intergenic	PLCB2;INAFM2	.
14	72427407	rs11626915	C	G	0.35	0.66	0.31	0.32	0.08	0.39	0.69	0.58	0.23	0.24	0.27	-0.07	-0.07	-0.03	-0.37	-0.37	0.58	0.088	0.168	0.003	0.167	0.559	0.229	0.162	0.513	0.149	0.148	0.102	0.005	0.005	0.002	0.234	0.233	0.559	intronic	RGS6	.
14	72436832	rs3784045	T	C	0.36	0.67	0.31	0.33	0.08	0.4	0.69	0.58	0.23	0.25	0.26	-0.09	-0.07	-0.02	-0.37	-0.36	0.58	0.088	0.171	0.003	0.164	0.559	0.246	0.147	0.52	0.152	0.157	0.095	0.009	0.007	0	0.23	0.222	0.559	intronic	RGS6	.
7	45667779	rs151207983	A	G	0.74	0.63	0.79	0.74	0.16	0.72	0.53	0.47	0.63	0.58	-0.09	0.07	0.03	0.1	0.26	0.21	0.63	0.033	0.081	0.001	0.047	0.257	0.476	0.068	0.346	0.558	0.505	0.025	0.01	0.001	0.003	0.139	0.098	0.558	intronic	ADCY1	.
17	33358842	rs12449795	C	T	0.44	0.58	0.41	0.4	0.02	0.15	0.48	0.55	0.39	0.38	0.42	0.26	0.25	0.1	-0.07	-0.08	0.55	0.021	0.046	0.003	0.047	0.437	0.097	0.218	0.558	0.319	0.312	0.312	0.13	0.128	0.007	0.01	0.011	0.558	intronic	ASIC2	.
17	33111440	rs9916435	C	A	0.33	0.52	0.27	0.37	0	0.17	0.31	0.51	0.27	0.37	0.35	0.11	0.2	0.21	-0.03	0.06	0.51	0.044	0.11	0.014	0.039	0.297	0.156	0.047	0.558	0.238	0.317	0.241	0.029	0.089	0.082	0.002	0.004	0.558	intronic	ASIC2	.
16	53852675	rs9934979	T	C	0.6	0.19	0.67	0.66	0.35	0.79	0.17	-0.16	0.32	0.31	-0.6	-0.12	-0.13	0.02	0.5	0.49	0.5	0.203	0.36	0.003	0.353	0.078	0.327	0.558	0.057	0.178	0.173	0.529	0.034	0.037	0.004	0.394	0.386	0.558	intronic	FTO	.
3	7373546	rs12492155	C	T	0.87	0.99	0.85	0.87	0.43	0.84	1	0.57	0.42	0.45	0.15	0.01	0.04	0	-0.15	-0.12	0.57	0.038	0.1	0.001	0.073	0.558	0.303	0.147	0.514	0.333	0.386	0.122	0.003	0.003	0.006	0.118	0.088	0.558	intronic	GRM7	.
7	141779000	rs2234002	G	A	0.61	0.82	0.63	0.54	0.2	0.45	0.74	0.62	0.43	0.34	0.36	0.17	0.09	0.08	-0.12	-0.2	0.62	0.067	0.092	0.009	0.157	0.456	0.135	0.156	0.557	0.294	0.206	0.245	0.046	0.009	0.013	0.033	0.084	0.557	exonic	TAS2R4	nonsynonymous
12	10804195	rs1838345	G	A	0.66	0.69	0.64	0.68	0.19	0.81	0.6	0.5	0.45	0.5	-0.12	-0.17	-0.12	0.09	0.04	0.09	0.5	0.001	0.002	0.001	0.005	0.3	0.557	0.096	0.409	0.351	0.403	0.036	0.057	0.03	0.01	0.001	0.015	0.557	intergenic	TAS2R7;TAS2R8	.
3	7148298	rs6793215	A	G	0.46	0.61	0.42	0.48	0.04	0.43	0.59	0.57	0.38	0.44	0.18	-0.01	0.05	0.01	-0.18	-0.12	0.57	0.017	0.047	0.002	0.02	0.529	0.358	0.047	0.557	0.319	0.365	0.041	0.004	0.001	0.006	0.053	0.025	0.557	intronic	GRM7	.
3	7153223	rs7626768	C	A	0.46	0.61	0.42	0.49	0.04	0.42	0.59	0.57	0.38	0.45	0.18	0	0.06	0.01	-0.17	-0.11	0.57	0.016	0.045	0.003	0.016	0.529	0.353	0.05	0.557	0.323	0.375	0.044	0.004	0.002	0.006	0.051	0.02	0.557	intronic	GRM7	.
6	154241168	rs3930218	G	A	0.43	0.57	0.5	0.31	0.05	0.1	0.64	0.52	0.45	0.26	0.47	0.4	0.21	-0.07	-0.14	-0.33	0.52	0.069	0.006	0.068	0.128	0.557	0.01	0.479	0.513	0.375	0.182	0.42	0.301	0.118	0.004	0.037	0.197	0.557	intronic	IPCEF1;OPRM1	.
12	6341412	rs4149623	G	A	0.95	0.95	0.98	0.95	0.43	0.99	0.9	0.52	0.55	0.52	-0.05	-0.02	-0.04	0.04	0.07	0.05	0.55	0.001	0.005	0.003	0.005	0.396	0.548	0.078	0.445	0.557	0.522	0.036	0.007	0.023	0.01	0.047	0.018	0.557	intronic	TNFRSF1A	.
17	70180748	rs1544490	A	G	0.57	0.55	0.62	0.53	0.07	0.67	0.5	0.48	0.54	0.46	-0.12	-0.05	-0.14	0.06	0.12	0.04	0.54	0.002	0.001	0.007	0.004	0.358	0.556	0.057	0.46	0.459	0.375	0.019	0.005	0.034	0.003	0.021	0.001	0.556	downstream	KCNJ2	.
17	33733690	rs9908295	C	A	0.71	0.64	0.62	0.78	0.15	0.76	0.65	0.49	0.47	0.63	-0.12	-0.14	0.02	-0.01	-0.03	0.13	0.63	0.033	0.004	0.049	0.038	0.408	0.545	0.025	0.418	0.374	0.556	0.026	0.036	0.003	0.007	0.003	0.036	0.556	intronic	ASIC2	.
12	88110483	rs11104739	G	A	0.63	0.7	0.58	0.65	0.14	0.63	0.76	0.56	0.44	0.51	0.07	-0.05	0.02	-0.06	-0.18	-0.11	0.56	0.005	0.013	0.005	0.003	0.556	0.401	0.035	0.481	0.346	0.417	0.001	0.002	0.003	0.008	0.056	0.022	0.556	intronic	CEP290	.
12	88100941	rs2471534	C	T	0.62	0.7	0.59	0.64	0.14	0.63	0.76	0.56	0.44	0.5	0.07	-0.04	0.01	-0.06	-0.18	-0.12	0.56	0.003	0.012	0.002	0.001	0.556	0.401	0.035	0.481	0.35	0.404	0.001	0.002	0.004	0.008	0.054	0.027	0.556	intronic	CEP290	.
3	7099418	rs56952162	A	G	0.69	0.64	0.67	0.7	0.12	0.73	0.63	0.52	0.55	0.59	-0.09	-0.06	-0.02	0.01	0.04	0.07	0.59	0.001	0.003	0.003	0.008	0.442	0.556	0.016	0.455	0.49	0.511	0.018	0	0.003	0.006	0.002	0.008	0.556	intronic	GRM7	.
14	72460489	rs2238182	T	A	0.52	0.67	0.5	0.51	0.14	0.43	0.76	0.53	0.36	0.36	0.24	0.07	0.07	-0.09	-0.26	-0.26	0.53	0.013	0.027	0.003	0.031	0.556	0.185	0.197	0.424	0.256	0.246	0.077	0.008	0.007	0.029	0.118	0.125	0.556	intronic	RGS6	.
3	7147685	rs7627179	G	A	0.46	0.61	0.42	0.47	0.04	0.42	0.59	0.56	0.37	0.43	0.18	-0.01	0.05	0.01	-0.18	-0.12	0.56	0.019	0.052	0.001	0.025	0.52	0.344	0.05	0.555	0.312	0.354	0.049	0.004	0	0.006	0.053	0.026	0.555	intronic	GRM7	.
21	34991865	rs11088302	G	A	0.48	0.58	0.46	0.44	0.04	0.47	0.41	0.54	0.42	0.4	0.11	-0.01	-0.03	0.18	0.05	0.04	0.54	0.012	0.024	0.003	0.03	0.323	0.393	0.003	0.555	0.361	0.345	0.024	0.004	0.004	0.06	0.003	0.001	0.555	intronic	RUNX1	.
17	34109076	rs4795864	A	G	0.63	0.62	0.64	0.64	0.08	0.68	0.48	0.54	0.56	0.56	-0.06	-0.04	-0.04	0.14	0.16	0.16	0.56	0.004	0.005	0.003	0.005	0.334	0.554	0.071	0.536	0.474	0.476	0.003	0.001	0	0.045	0.038	0.042	0.554	intronic	ASIC2	.
7	127127593	rs17864136	T	C	0.71	0.84	0.69	0.69	0.23	0.67	0.79	0.61	0.46	0.47	0.17	0.01	0.02	0.05	-0.11	-0.1	0.61	0.026	0.053	0.003	0.063	0.481	0.331	0.031	0.554	0.364	0.344	0.076	0.003	0.004	0.006	0.016	0.023	0.554	intronic	GRM8	.
7	127125974	rs17867032	T	C	0.71	0.84	0.69	0.7	0.23	0.67	0.79	0.61	0.46	0.47	0.17	0.01	0.02	0.05	-0.11	-0.1	0.61	0.026	0.053	0.003	0.063	0.481	0.331	0.031	0.554	0.364	0.344	0.076	0.003	0.004	0.006	0.016	0.023	0.554	intronic	GRM8	.
7	127118743	rs2237792	C	T	0.71	0.84	0.68	0.69	0.23	0.67	0.79	0.61	0.45	0.47	0.17	0.01	0.02	0.05	-0.11	-0.1	0.61	0.027	0.055	0.003	0.064	0.481	0.331	0.031	0.554	0.36	0.342	0.076	0.003	0.004	0.006	0.017	0.024	0.554	intronic	GRM8	.
7	127144783	rs7791539	A	G	0.71	0.84	0.68	0.7	0.23	0.67	0.79	0.61	0.45	0.47	0.17	0.01	0.02	0.05	-0.1	-0.09	0.61	0.026	0.055	0.003	0.063	0.474	0.331	0.027	0.554	0.36	0.344	0.076	0.003	0.004	0.008	0.015	0.021	0.554	intronic	GRM8	.
21	35048739	rs8133634	C	T	0.62	0.48	0.73	0.56	0.11	0.45	0.42	0.37	0.62	0.45	0.04	0.28	0.11	0.06	0.31	0.13	0.62	0.064	0.127	0.064	0.006	0.219	0.248	0.003	0.295	0.554	0.341	0.004	0.153	0.017	0.001	0.18	0.03	0.554	intronic	RUNX1	.
7	80456672	rs76699644	G	T	0.4	0.6	0.39	0.35	0.05	0.34	0.63	0.55	0.34	0.3	0.26	0.05	0.01	-0.03	-0.24	-0.28	0.55	0.052	0.084	0	0.118	0.549	0.249	0.144	0.553	0.266	0.224	0.118	0.001	0.004	0.005	0.107	0.143	0.553	intergenic	LOC101927269;GNAT3	.
16	53944908	rs12931934	T	C	0.54	0.27	0.5	0.58	0.03	0.6	0.32	0.24	0.48	0.56	-0.32	-0.09	-0.01	-0.05	0.18	0.26	0.56	0.077	0.108	0.008	0.177	0.259	0.553	0.138	0.23	0.427	0.498	0.19	0.011	0.004	0.001	0.067	0.127	0.553	intronic	FTO	.
19	9203917	rs10405081	T	C	0.7	0.71	0.75	0.74	0.24	0.86	0.72	0.47	0.51	0.5	-0.15	-0.11	-0.12	-0.01	0.03	0.02	0.51	0.003	0.002	0.003	0.002	0.37	0.552	0.053	0.354	0.402	0.396	0.064	0.034	0.037	0.006	0.002	0.003	0.552	intergenic	OR7D2;OR7D4	.
3	7008976	rs338083	A	T	0.43	0.66	0.36	0.43	0.08	0.53	0.53	0.58	0.28	0.35	0.13	-0.17	-0.09	0.13	-0.17	-0.1	0.58	0.069	0.163	0.012	0.084	0.387	0.385	0.005	0.552	0.185	0.268	0.028	0.055	0.011	0.026	0.058	0.012	0.552	intronic	GRM7	.
7	126668214	rs10234189	A	T	0.46	0.74	0.44	0.43	0.13	0.34	0.48	0.61	0.31	0.3	0.4	0.1	0.09	0.26	-0.04	-0.05	0.61	0.08	0.158	0.004	0.158	0.252	0.116	0.033	0.552	0.194	0.191	0.257	0.013	0.012	0.116	0	0	0.552	intronic	GRM8	.
7	126665605	rs7779831	G	A	0.46	0.74	0.45	0.43	0.13	0.34	0.49	0.61	0.32	0.3	0.4	0.1	0.08	0.26	-0.04	-0.06	0.61	0.079	0.154	0.003	0.158	0.257	0.116	0.035	0.552	0.198	0.191	0.257	0.014	0.012	0.112	0	0.001	0.552	intronic	GRM8	.
7	45725360	rs2471265	C	T	0.61	0.48	0.69	0.57	0.06	0.38	0.32	0.42	0.62	0.5	0.1	0.3	0.19	0.17	0.37	0.25	0.62	0.035	0.085	0.02	0.018	0.184	0.257	0.006	0.368	0.552	0.43	0.007	0.158	0.065	0.04	0.229	0.121	0.552	ncRNA_intronic	SEPT7P2	.
6	88171898	rs9294395	A	T	0.59	0.87	0.55	0.59	0.24	0.53	0.71	0.64	0.32	0.35	0.35	0.03	0.06	0.16	-0.16	-0.12	0.64	0.079	0.18	0	0.142	0.364	0.16	0.064	0.551	0.186	0.225	0.217	0.002	0.005	0.057	0.045	0.024	0.551	intergenic	CNR1;LOC101928936	.
12	10799577	rs10772362	T	C	0.66	0.7	0.65	0.68	0.19	0.81	0.6	0.51	0.46	0.49	-0.11	-0.16	-0.13	0.1	0.05	0.08	0.51	0.003	0.003	0.002	0.005	0.294	0.551	0.096	0.41	0.357	0.387	0.032	0.05	0.035	0.012	0.003	0.012	0.551	intergenic	LINC02366;TAS2R7	.
17	33358516	rs55829521	T	G	0.43	0.57	0.4	0.39	0.02	0.15	0.48	0.55	0.38	0.37	0.42	0.25	0.24	0.09	-0.08	-0.09	0.55	0.022	0.046	0.003	0.05	0.437	0.097	0.218	0.551	0.312	0.299	0.304	0.124	0.117	0.005	0.013	0.016	0.551	intronic	ASIC2	.
15	40311847	rs11070263	C	A	0.41	0.72	0.42	0.33	0.31	0.15	0.76	0.41	0.12	0.03	0.57	0.28	0.18	-0.04	-0.34	-0.43	0.57	0.111	0.156	0.01	0.241	0.343	0.065	0.55	0.278	0.021	0.002	0.498	0.152	0.084	0.001	0.214	0.303	0.55	intergenic	PLCB2;INAFM2	.
3	7161631	rs1499141	A	G	0.45	0.6	0.42	0.47	0.04	0.4	0.59	0.56	0.38	0.44	0.19	0.02	0.07	0.01	-0.17	-0.12	0.56	0.015	0.041	0.001	0.018	0.529	0.332	0.063	0.55	0.323	0.361	0.053	0.003	0.004	0.006	0.051	0.026	0.55	intronic	GRM7	.
6	154135378	rs9371328	G	A	0.45	0.4	0.56	0.37	0	0.11	0.33	0.4	0.56	0.37	0.3	0.46	0.27	0.08	0.24	0.05	0.56	0.058	0.06	0.085	0.004	0.327	0.107	0.127	0.455	0.55	0.328	0.214	0.383	0.16	0.006	0.123	0	0.55	intronic	OPRM1	.
21	34926196	rs2017589	T	A	0.93	0.92	0.95	0.91	0.38	0.89	0.92	0.53	0.57	0.52	0.02	0.06	0.01	-0.01	0.03	-0.01	0.57	0.004	0.001	0.01	0.003	0.479	0.432	0	0.455	0.55	0.479	0.001	0.018	0.003	0.006	0.002	0.002	0.55	intronic	RUNX1	.
7	80466043	rs1473122	A	T	0.38	0.58	0.36	0.34	0.05	0.33	0.63	0.54	0.31	0.29	0.25	0.03	0	-0.04	-0.27	-0.29	0.54	0.052	0.091	0.002	0.112	0.549	0.238	0.154	0.531	0.238	0.211	0.109	0.003	0.004	0.002	0.133	0.158	0.549	intronic	GNAT3	.
7	80466098	rs1473123	A	T	0.38	0.59	0.35	0.34	0.05	0.33	0.63	0.54	0.3	0.29	0.26	0.02	0	-0.04	-0.28	-0.29	0.54	0.056	0.102	0.003	0.119	0.549	0.238	0.154	0.538	0.231	0.211	0.115	0.004	0.004	0.003	0.14	0.158	0.549	intronic	GNAT3	.
7	80462814	rs17153970	A	G	0.38	0.58	0.35	0.33	0.05	0.33	0.63	0.54	0.31	0.29	0.26	0.03	0.01	-0.04	-0.27	-0.29	0.54	0.054	0.094	0.002	0.117	0.549	0.233	0.159	0.53	0.235	0.205	0.113	0.003	0.004	0.002	0.137	0.163	0.549	intronic	GNAT3	.
7	80458996	rs2074675	T	C	0.37	0.59	0.34	0.33	0.05	0.33	0.63	0.54	0.3	0.28	0.26	0.02	0	-0.04	-0.28	-0.3	0.54	0.059	0.108	0.003	0.124	0.549	0.233	0.159	0.538	0.225	0.205	0.119	0.004	0.004	0.003	0.146	0.163	0.549	intronic	GNAT3	.
7	80470679	rs4615513	C	G	0.38	0.59	0.35	0.33	0.05	0.33	0.63	0.54	0.31	0.29	0.26	0.03	0	-0.04	-0.27	-0.29	0.54	0.057	0.099	0.002	0.123	0.549	0.233	0.159	0.538	0.235	0.206	0.119	0.003	0.004	0.003	0.137	0.162	0.549	intronic	GNAT3	.
7	80460148	rs73159414	A	C	0.38	0.6	0.35	0.33	0.05	0.33	0.63	0.55	0.3	0.29	0.27	0.02	0	-0.03	-0.28	-0.29	0.55	0.061	0.111	0.003	0.127	0.549	0.238	0.154	0.545	0.229	0.208	0.121	0.004	0.004	0.004	0.142	0.16	0.549	intronic	GNAT3	.
17	33864170	rs12452412	G	C	0.43	0.75	0.44	0.35	0.15	0.3	0.63	0.6	0.29	0.2	0.45	0.14	0.04	0.12	-0.19	-0.28	0.6	0.129	0.156	0.024	0.278	0.392	0.062	0.191	0.548	0.194	0.09	0.332	0.046	0.001	0.028	0.054	0.149	0.548	intronic	ASIC2	.
17	33862757	rs55783993	G	T	0.43	0.75	0.44	0.35	0.15	0.3	0.63	0.6	0.29	0.2	0.45	0.13	0.04	0.12	-0.2	-0.28	0.6	0.128	0.159	0.022	0.277	0.392	0.062	0.191	0.548	0.191	0.091	0.332	0.044	0.001	0.028	0.056	0.148	0.548	intronic	ASIC2	.
17	33355832	rs950537	T	A	0.43	0.58	0.41	0.4	0.03	0.15	0.48	0.55	0.38	0.37	0.42	0.26	0.25	0.1	-0.07	-0.08	0.55	0.022	0.046	0.003	0.05	0.428	0.088	0.218	0.548	0.311	0.298	0.312	0.13	0.123	0.007	0.01	0.013	0.548	intronic	ASIC2	.
14	72457178	rs12881810	A	G	0.33	0.65	0.26	0.31	0.08	0.36	0.68	0.57	0.17	0.22	0.29	-0.11	-0.06	-0.03	-0.42	-0.37	0.57	0.11	0.223	0	0.178	0.548	0.203	0.178	0.505	0.102	0.134	0.118	0.017	0.003	0.002	0.288	0.241	0.548	intronic	RGS6	.
3	171007094	rs8192675	C	T	0.72	0.72	0.73	0.7	0.19	0.71	0.8	0.53	0.55	0.51	0.01	0.03	-0.01	-0.08	-0.07	-0.11	0.55	0.001	0.003	0.005	0.003	0.548	0.431	0.018	0.45	0.475	0.397	0.006	0	0.004	0.013	0.004	0.028	0.548	intronic	SLC2A2	.
19	33808946	rs29947	G	A	0.38	0.74	0.37	0.34	0.14	0.27	0.7	0.6	0.23	0.2	0.47	0.1	0.07	0.04	-0.33	-0.35	0.6	0.145	0.245	0.001	0.281	0.48	0.045	0.304	0.547	0.114	0.088	0.362	0.015	0.005	0	0.195	0.23	0.547	intronic	KCTD15	.
6	88170982	rs9353528	T	C	0.59	0.87	0.57	0.59	0.24	0.53	0.71	0.63	0.33	0.35	0.35	0.04	0.06	0.16	-0.14	-0.12	0.63	0.075	0.167	0.002	0.144	0.358	0.155	0.064	0.545	0.194	0.218	0.217	0	0.005	0.057	0.037	0.025	0.545	intergenic	CNR1;LOC101928936	.
17	34089440	rs886358	G	A	0.63	0.59	0.65	0.64	0.09	0.68	0.47	0.5	0.56	0.55	-0.09	-0.03	-0.04	0.12	0.18	0.18	0.56	0.004	0.004	0.003	0.004	0.302	0.545	0.086	0.488	0.473	0.467	0.004	0	0.001	0.036	0.054	0.053	0.545	intronic	ASIC2	.
6	34032512	rs2451379	C	G	0.71	0.62	0.66	0.78	0.19	0.81	0.6	0.43	0.47	0.59	-0.19	-0.15	-0.03	0.02	0.07	0.18	0.59	0.033	0.003	0.03	0.07	0.288	0.545	0.097	0.298	0.351	0.501	0.099	0.051	0.001	0.006	0.004	0.07	0.545	intronic	GRM4	.
3	10292337	rs27498	G	A	0.63	0.92	0.67	0.58	0.39	0.44	0.97	0.53	0.28	0.19	0.48	0.23	0.14	-0.05	-0.3	-0.39	0.53	0.102	0.145	0.016	0.229	0.545	0	0.5	0.44	0.142	0.061	0.388	0.097	0.031	0.017	0.233	0.321	0.545	ncRNA_exonic	GHRLOS	.
7	45719663	rs2471267	C	T	0.61	0.48	0.68	0.57	0.06	0.38	0.32	0.42	0.61	0.5	0.11	0.3	0.19	0.17	0.36	0.25	0.61	0.034	0.085	0.017	0.021	0.184	0.251	0.004	0.359	0.545	0.429	0.006	0.155	0.069	0.036	0.221	0.121	0.545	UTR3	ADCY1	.
19	48746557	rs8104897	C	A	0.55	0.89	0.54	0.46	0.27	0.42	0.83	0.62	0.27	0.19	0.47	0.12	0.04	0.06	-0.28	-0.37	0.62	0.145	0.227	0.009	0.306	0.473	0.044	0.296	0.545	0.138	0.072	0.37	0.025	0.001	0.01	0.161	0.239	0.545	UTR5	IZUMO1	.
7	80456971	rs60141912	G	A	0.41	0.6	0.39	0.36	0.05	0.34	0.63	0.55	0.34	0.31	0.26	0.05	0.01	-0.03	-0.23	-0.27	0.55	0.05	0.082	0.001	0.113	0.541	0.24	0.144	0.544	0.261	0.222	0.118	0	0.004	0.005	0.105	0.138	0.544	intergenic	LOC101927269;GNAT3	.
17	33841523	rs317385	G	C	0.18	0.5	0.16	0.16	0	0.1	0.51	0.5	0.15	0.15	0.4	0.06	0.06	-0.01	-0.35	-0.35	0.5	0.155	0.267	0.003	0.248	0.504	0.082	0.331	0.544	0.118	0.127	0.341	0.008	0.014	0.006	0.265	0.248	0.544	intronic	ASIC2	.
17	33847586	rs317391	T	C	0.18	0.5	0.16	0.16	0	0.1	0.55	0.5	0.15	0.15	0.4	0.06	0.06	-0.05	-0.39	-0.39	0.5	0.161	0.269	0.003	0.264	0.543	0.082	0.374	0.544	0.117	0.118	0.341	0.007	0.01	0.001	0.311	0.306	0.544	intronic	ASIC2	.
7	126657893	rs2402822	A	G	0.46	0.73	0.45	0.43	0.13	0.35	0.48	0.61	0.32	0.3	0.39	0.1	0.09	0.26	-0.03	-0.04	0.61	0.073	0.147	0.003	0.145	0.246	0.121	0.027	0.544	0.198	0.197	0.243	0.012	0.013	0.114	0.002	0.002	0.544	intronic	GRM8	.
7	126685302	rs6969693	G	C	0.45	0.73	0.42	0.44	0.13	0.36	0.49	0.61	0.29	0.31	0.37	0.06	0.07	0.24	-0.07	-0.05	0.61	0.077	0.167	0.002	0.139	0.262	0.135	0.027	0.544	0.178	0.203	0.226	0.002	0.01	0.102	0.006	0	0.544	intronic	GRM8	.
17	3587593	rs222746	C	T	0.72	0.55	0.72	0.76	0.17	0.78	0.49	0.37	0.55	0.59	-0.24	-0.06	-0.02	0.06	0.24	0.28	0.59	0.05	0.07	0.003	0.115	0.198	0.544	0.169	0.252	0.453	0.512	0.132	0.007	0.003	0.003	0.103	0.152	0.544	intronic	TRPV1	.
17	33490856	rs4305127	T	C	0.58	0.58	0.6	0.55	0.04	0.58	0.42	0.54	0.56	0.51	-0.01	0.02	-0.03	0.15	0.18	0.12	0.56	0.001	0.004	0.002	0.004	0.348	0.52	0.044	0.543	0.503	0.444	0.006	0.004	0.002	0.037	0.055	0.027	0.543	intronic	ASIC2	.
9	6557589	rs7021944	A	G	0.52	0.72	0.45	0.53	0.12	0.55	0.65	0.6	0.33	0.41	0.17	-0.1	-0.02	0.07	-0.2	-0.12	0.6	0.05	0.122	0.01	0.059	0.452	0.339	0.016	0.543	0.224	0.305	0.051	0.014	0.004	0.005	0.069	0.023	0.543	intronic	GLDC	.
3	7039214	rs234790	G	C	0.41	0.67	0.37	0.4	0.09	0.45	0.55	0.58	0.28	0.32	0.22	-0.08	-0.05	0.12	-0.18	-0.15	0.58	0.073	0.164	0.002	0.116	0.393	0.286	0.014	0.543	0.177	0.222	0.081	0.013	0.001	0.021	0.067	0.035	0.543	intronic	GRM7	.
3	7040459	rs6806817	C	T	0.44	0.67	0.38	0.44	0.09	0.45	0.55	0.58	0.29	0.35	0.21	-0.08	-0.01	0.11	-0.18	-0.11	0.58	0.067	0.159	0.01	0.084	0.398	0.292	0.014	0.543	0.181	0.26	0.078	0.013	0.004	0.018	0.067	0.019	0.543	intronic	GRM7	.
7	127204685	rs1361957	G	A	0.49	0.77	0.44	0.47	0.16	0.38	0.73	0.61	0.29	0.31	0.38	0.06	0.09	0.03	-0.29	-0.26	0.61	0.085	0.18	0.002	0.156	0.501	0.119	0.217	0.542	0.166	0.187	0.245	0.003	0.009	0.004	0.155	0.132	0.542	intronic	GRM8	.
7	80456807	rs58740792	A	G	0.41	0.59	0.39	0.36	0.05	0.34	0.63	0.54	0.34	0.31	0.25	0.05	0.01	-0.04	-0.23	-0.27	0.54	0.047	0.076	0	0.107	0.541	0.24	0.144	0.536	0.262	0.222	0.112	0	0.004	0.004	0.104	0.138	0.541	intergenic	LOC101927269;GNAT3	.
1	167880463	rs203850	A	G	0.97	0.93	0.98	0.99	0.49	0.99	0.96	0.45	0.49	0.5	-0.06	-0.01	0	-0.02	0.02	0.03	0.5	0.024	0.028	0.001	0.05	0.424	0.482	0.016	0.364	0.513	0.541	0.038	0.002	0.004	0.002	0.009	0.022	0.541	intronic	ADCY10	.
7	80459276	rs17147968	A	G	0.37	0.59	0.35	0.34	0.05	0.33	0.63	0.54	0.3	0.29	0.26	0.02	0	-0.04	-0.28	-0.29	0.54	0.056	0.105	0.003	0.118	0.541	0.229	0.154	0.529	0.221	0.204	0.115	0.004	0.004	0.003	0.142	0.156	0.541	intronic	GNAT3	.
3	6902358	rs7634694	G	A	0.81	0.98	0.81	0.76	0.42	0.58	0.98	0.56	0.4	0.34	0.4	0.23	0.18	0	-0.17	-0.22	0.56	0.057	0.097	0.005	0.137	0.541	0.049	0.38	0.492	0.29	0.222	0.33	0.122	0.072	0.004	0.122	0.166	0.541	intronic	GRM7	.
21	34924881	rs4817699	T	C	0.93	0.92	0.95	0.9	0.39	0.89	0.92	0.52	0.56	0.51	0.02	0.06	0.01	-0.01	0.03	-0.02	0.56	0.006	0.001	0.013	0.003	0.468	0.422	0	0.445	0.541	0.458	0.001	0.018	0.004	0.006	0.002	0.001	0.541	intronic	RUNX1	.
21	34927368	rs764967	G	T	0.92	0.89	0.96	0.9	0.41	0.85	0.93	0.48	0.55	0.49	0.05	0.11	0.05	-0.04	0.03	-0.03	0.55	0.014	0.024	0.024	0.005	0.463	0.333	0.031	0.394	0.541	0.435	0.007	0.071	0.008	0	0.003	0.003	0.541	intronic	RUNX1	.
10	112961809	rs720785	C	G	0.66	0.43	0.69	0.68	0.13	0.73	0.36	0.3	0.56	0.55	-0.3	-0.04	-0.06	0.07	0.33	0.31	0.56	0.073	0.149	0.003	0.132	0.135	0.541	0.237	0.186	0.479	0.456	0.193	0	0.004	0.002	0.192	0.173	0.541	intronic	TCF7L2	.
17	33859012	rs10512457	A	G	0.43	0.74	0.44	0.35	0.15	0.31	0.63	0.59	0.29	0.2	0.43	0.13	0.04	0.11	-0.19	-0.28	0.59	0.122	0.149	0.022	0.266	0.392	0.066	0.185	0.539	0.194	0.093	0.317	0.042	0.001	0.024	0.054	0.145	0.539	intronic	ASIC2	.
17	33862112	rs12451209	C	A	0.43	0.74	0.43	0.34	0.15	0.3	0.63	0.59	0.28	0.2	0.44	0.13	0.04	0.11	-0.2	-0.29	0.59	0.126	0.156	0.022	0.273	0.392	0.062	0.191	0.539	0.188	0.088	0.323	0.042	0.001	0.024	0.058	0.151	0.539	intronic	ASIC2	.
17	33867328	rs17783677	A	C	0.43	0.74	0.44	0.34	0.15	0.3	0.63	0.59	0.3	0.19	0.44	0.14	0.03	0.11	-0.19	-0.29	0.59	0.129	0.146	0.03	0.281	0.392	0.062	0.191	0.539	0.198	0.083	0.323	0.048	0.002	0.024	0.052	0.158	0.539	intronic	ASIC2	.
17	33857454	rs61333585	G	A	0.44	0.74	0.45	0.36	0.15	0.32	0.64	0.59	0.31	0.21	0.42	0.14	0.04	0.11	-0.18	-0.28	0.59	0.117	0.137	0.024	0.255	0.398	0.074	0.179	0.539	0.208	0.1	0.304	0.044	0.001	0.022	0.049	0.141	0.539	intronic	ASIC2	.
9	6603111	rs7034260	C	T	0.85	0.95	0.85	0.82	0.4	0.75	0.97	0.55	0.45	0.42	0.21	0.1	0.08	-0.02	-0.12	-0.15	0.55	0.03	0.05	0.001	0.077	0.539	0.212	0.185	0.486	0.359	0.307	0.143	0.029	0.009	0.004	0.074	0.104	0.539	intronic	GLDC	.
3	7286787	rs13067602	T	G	0.46	0.52	0.49	0.45	0.02	0.35	0.51	0.5	0.47	0.44	0.17	0.14	0.11	0	-0.02	-0.06	0.5	0.001	0.003	0	0.006	0.481	0.312	0.05	0.539	0.425	0.377	0.058	0.038	0.018	0.006	0.003	0.004	0.539	intronic	GRM7	.
7	127103036	rs11771458	T	C	0.59	0.83	0.51	0.6	0.23	0.6	0.82	0.6	0.28	0.37	0.23	-0.09	0	0.02	-0.31	-0.21	0.6	0.085	0.199	0.008	0.13	0.507	0.244	0.101	0.539	0.153	0.227	0.127	0.01	0.004	0.003	0.172	0.105	0.539	intronic	GRM8	.
12	10793707	rs7489265	G	A	0.66	0.69	0.65	0.67	0.17	0.78	0.6	0.52	0.48	0.5	-0.09	-0.13	-0.11	0.09	0.05	0.07	0.52	0.003	0.003	0.002	0.005	0.32	0.538	0.068	0.43	0.377	0.402	0.017	0.032	0.021	0.01	0.003	0.009	0.538	intergenic	LINC02366;TAS2R7	.
1	167880089	rs203848	A	G	0.98	1	0.99	0.95	0.48	0.93	1	0.52	0.51	0.47	0.07	0.06	0.02	0	-0.01	-0.05	0.52	0.032	0.002	0.029	0.037	0.515	0.385	0.068	0.473	0.538	0.447	0.056	0.049	0.002	0	0.005	0.044	0.538	intronic	ADCY10	.
7	127022566	rs1544326	T	C	0.34	0.58	0.32	0.32	0.05	0.23	0.54	0.53	0.28	0.28	0.35	0.1	0.1	0.03	-0.22	-0.22	0.53	0.068	0.122	0.002	0.14	0.46	0.128	0.186	0.538	0.211	0.191	0.233	0.02	0.013	0.003	0.088	0.104	0.538	intronic	GRM8	.
15	25409602	rs1041933	C	T	0.73	0.67	0.71	0.76	0.18	0.78	0.57	0.5	0.54	0.58	-0.11	-0.07	-0.02	0.11	0.15	0.19	0.58	0.006	0.002	0.005	0.016	0.28	0.537	0.095	0.415	0.44	0.511	0.023	0.009	0.004	0.019	0.04	0.084	0.537	intronic	UBE3A	.
15	25411360	rs11631038	C	T	0.73	0.67	0.71	0.76	0.18	0.78	0.57	0.49	0.53	0.58	-0.12	-0.07	-0.02	0.1	0.14	0.19	0.58	0.007	0.002	0.006	0.019	0.28	0.537	0.095	0.406	0.434	0.511	0.027	0.011	0.004	0.016	0.037	0.084	0.537	intronic	UBE3A	.
15	25355175	rs12907375	G	A	0.73	0.68	0.71	0.75	0.18	0.78	0.58	0.51	0.53	0.58	-0.1	-0.07	-0.03	0.1	0.13	0.17	0.58	0.005	0.004	0.005	0.012	0.297	0.537	0.084	0.423	0.434	0.507	0.02	0.011	0.003	0.016	0.029	0.07	0.537	intronic	UBE3A	.
15	25388804	rs34050354	G	C	0.73	0.67	0.71	0.75	0.18	0.78	0.58	0.5	0.53	0.58	-0.11	-0.07	-0.03	0.09	0.13	0.17	0.58	0.005	0.003	0.004	0.013	0.297	0.537	0.084	0.415	0.434	0.502	0.023	0.011	0.003	0.013	0.029	0.067	0.537	intronic	UBE3A	.
15	25390871	rs34698527	G	T	0.73	0.67	0.71	0.75	0.18	0.78	0.58	0.5	0.53	0.58	-0.11	-0.07	-0.03	0.09	0.13	0.17	0.58	0.005	0.003	0.004	0.013	0.297	0.537	0.084	0.415	0.434	0.502	0.023	0.011	0.003	0.013	0.029	0.067	0.537	intronic	UBE3A	.
15	25372832	rs4906708	T	C	0.73	0.67	0.71	0.75	0.18	0.78	0.58	0.5	0.53	0.58	-0.11	-0.07	-0.03	0.09	0.13	0.17	0.58	0.006	0.003	0.005	0.014	0.297	0.537	0.084	0.415	0.434	0.507	0.023	0.011	0.003	0.013	0.029	0.07	0.537	intronic	UBE3A	.
15	25418441	rs61998993	C	A	0.73	0.67	0.71	0.75	0.18	0.78	0.58	0.49	0.53	0.57	-0.12	-0.07	-0.03	0.09	0.13	0.17	0.57	0.005	0.001	0.003	0.015	0.291	0.537	0.087	0.406	0.436	0.498	0.027	0.011	0.002	0.012	0.032	0.068	0.537	intronic	UBE3A	.
15	25399472	rs7181129	G	A	0.73	0.67	0.71	0.75	0.18	0.78	0.57	0.5	0.53	0.58	-0.11	-0.07	-0.03	0.11	0.14	0.19	0.58	0.006	0.003	0.005	0.014	0.28	0.537	0.095	0.415	0.434	0.507	0.023	0.011	0.003	0.019	0.037	0.081	0.537	intronic	UBE3A	.
15	25389769	rs8040809	T	A	0.73	0.67	0.7	0.75	0.18	0.78	0.57	0.5	0.53	0.58	-0.11	-0.08	-0.03	0.11	0.14	0.19	0.58	0.005	0.003	0.006	0.014	0.28	0.537	0.095	0.415	0.43	0.504	0.023	0.012	0.003	0.019	0.035	0.079	0.537	intronic	UBE3A	.
1	167890605	rs61806999	A	G	0.58	0.53	0.56	0.59	0.07	0.22	0.15	0.46	0.49	0.52	0.31	0.34	0.37	0.38	0.41	0.44	0.52	0.001	0.006	0.001	0	0.029	0.087	0.012	0.536	0.453	0.481	0.194	0.21	0.24	0.324	0.312	0.342	0.536	intronic	ADCY10	.
17	33423366	rs8075266	C	T	0.4	0.8	0.37	0.37	0.21	0.29	0.82	0.59	0.16	0.17	0.51	0.07	0.08	-0.01	-0.45	-0.44	0.59	0.157	0.298	0.002	0.279	0.536	0.014	0.431	0.51	0.057	0.067	0.398	0.009	0.015	0.005	0.33	0.31	0.536	intronic	ASIC2	.
14	72450618	rs4903023	T	C	0.52	0.68	0.5	0.51	0.16	0.5	0.77	0.52	0.34	0.35	0.18	0	0.01	-0.09	-0.27	-0.26	0.52	0.015	0.032	0.003	0.035	0.536	0.227	0.138	0.403	0.228	0.223	0.038	0.004	0.004	0.028	0.126	0.129	0.536	intronic	RGS6	.
10	113120792	rs12772424	T	A	0.72	0.89	0.74	0.66	0.33	0.47	0.92	0.55	0.41	0.33	0.42	0.27	0.19	-0.04	-0.18	-0.26	0.55	0.053	0.046	0.02	0.119	0.536	0.034	0.39	0.457	0.295	0.178	0.305	0.151	0.06	0.004	0.094	0.181	0.536	intronic	TCF7L2	.
7	45710969	rs2471271	G	A	0.64	0.47	0.72	0.59	0.11	0.38	0.32	0.36	0.61	0.49	0.09	0.34	0.21	0.15	0.4	0.28	0.61	0.057	0.137	0.023	0.044	0.12	0.188	0.006	0.263	0.535	0.402	0.001	0.195	0.087	0.029	0.27	0.148	0.535	intronic	ADCY1	.
21	34924567	rs1006639	G	T	0.92	0.91	0.95	0.9	0.39	0.87	0.92	0.52	0.55	0.51	0.04	0.08	0.03	-0.01	0.02	-0.02	0.55	0.005	0.002	0.012	0.004	0.468	0.384	0.011	0.435	0.535	0.454	0.006	0.033	0	0.005	0	0.001	0.535	intronic	RUNX1	.
12	6352063	rs56888996	A	G	0.9	0.95	0.91	0.92	0.42	0.98	0.91	0.54	0.49	0.5	-0.03	-0.07	-0.06	0.04	0	0.01	0.54	0.004	0.015	0.002	0.007	0.427	0.535	0.038	0.47	0.433	0.463	0.003	0.043	0.031	0.01	0.003	0.004	0.535	intronic	SCNN1A	.
3	7373765	rs10510366	A	G	0.87	0.99	0.85	0.88	0.45	0.84	1	0.54	0.4	0.43	0.15	0.01	0.04	0	-0.15	-0.12	0.54	0.039	0.1	0.001	0.072	0.534	0.278	0.147	0.491	0.307	0.364	0.122	0.003	0.004	0.006	0.118	0.086	0.534	intronic	GRM7	.
3	7261220	rs1396409	G	A	0.46	0.47	0.49	0.51	0	0.41	0.42	0.47	0.49	0.51	0.06	0.07	0.09	0.05	0.07	0.08	0.51	0.003	0.005	0.002	0.002	0.425	0.423	0.005	0.534	0.453	0.471	0.003	0.008	0.017	0	0.005	0.013	0.534	intronic	GRM7	.
3	7373779	rs56872097	A	T	0.87	0.99	0.85	0.88	0.45	0.84	1	0.54	0.4	0.43	0.15	0.01	0.04	0	-0.15	-0.12	0.54	0.039	0.1	0.001	0.072	0.534	0.278	0.147	0.491	0.307	0.364	0.122	0.003	0.004	0.006	0.118	0.086	0.534	intronic	GRM7	.
21	34924092	rs116213488	C	G	0.92	0.9	0.95	0.9	0.39	0.87	0.92	0.51	0.55	0.5	0.03	0.08	0.03	-0.02	0.02	-0.02	0.55	0.006	0.006	0.013	0.004	0.468	0.384	0.011	0.425	0.534	0.45	0.002	0.033	0.001	0.004	0	0	0.534	intronic	RUNX1	.
21	34921022	rs34372043	C	T	0.42	0.59	0.39	0.36	0.04	0.45	0.58	0.55	0.35	0.32	0.14	-0.06	-0.09	0.01	-0.19	-0.22	0.55	0.032	0.056	0.002	0.073	0.51	0.371	0.03	0.533	0.284	0.256	0.023	0.002	0.009	0.006	0.065	0.083	0.533	intronic	RUNX1	.
1	6563062	rs4908927	G	T	0.81	0.86	0.8	0.83	0.31	0.9	0.77	0.55	0.49	0.52	-0.04	-0.11	-0.08	0.1	0.03	0.06	0.55	0.001	0.003	0.001	0.003	0.343	0.533	0.061	0.447	0.395	0.435	0.007	0.035	0.02	0.016	0.001	0.007	0.533	intronic	TAS1R1	.
6	154039662	rs1799971	A	G	0.44	0.46	0.55	0.34	0	0.15	0.35	0.46	0.55	0.34	0.31	0.39	0.19	0.11	0.2	-0.01	0.55	0.059	0.019	0.093	0.021	0.352	0.153	0.094	0.513	0.532	0.304	0.203	0.302	0.086	0.018	0.088	0.004	0.532	exonic	OPRM1	nonsynonymous
17	33364883	rs12453775	C	T	0.41	0.55	0.38	0.38	0.02	0.15	0.48	0.53	0.36	0.36	0.39	0.22	0.23	0.07	-0.1	-0.09	0.53	0.019	0.045	0.003	0.038	0.441	0.107	0.213	0.532	0.294	0.301	0.272	0.102	0.111	0.001	0.022	0.017	0.532	intronic	ASIC2	.
16	53932151	rs9924072	G	A	0.6	0.71	0.56	0.62	0.14	0.55	0.74	0.57	0.41	0.47	0.17	0.01	0.07	-0.03	-0.19	-0.13	0.57	0.012	0.037	0.001	0.013	0.532	0.303	0.077	0.506	0.315	0.368	0.051	0.003	0.006	0.004	0.059	0.03	0.532	intronic	FTO	.
6	34077329	rs2451356	C	T	0.71	0.55	0.68	0.78	0.19	0.8	0.59	0.35	0.49	0.58	-0.25	-0.11	-0.02	-0.05	0.09	0.18	0.58	0.046	0.04	0.013	0.111	0.282	0.532	0.09	0.234	0.39	0.494	0.137	0.025	0.003	0.001	0.016	0.069	0.532	intronic	GRM4	.
3	7273465	rs12491748	A	G	0.49	0.51	0.52	0.51	0.02	0.41	0.5	0.49	0.5	0.49	0.1	0.11	0.1	0	0.02	0.01	0.5	0.004	0.005	0.003	0.005	0.471	0.376	0.014	0.532	0.456	0.446	0.02	0.022	0.021	0.005	0.003	0.003	0.532	intronic	GRM7	.
3	7329682	rs6795415	A	G	0.52	0.51	0.52	0.57	0.02	0.38	0.46	0.49	0.5	0.55	0.13	0.14	0.19	0.05	0.06	0.11	0.55	0.002	0.005	0.001	0.002	0.426	0.344	0.009	0.532	0.459	0.488	0.035	0.039	0.061	0.001	0.004	0.016	0.532	intronic	GRM7	.
3	7099681	rs9845990	A	G	0.76	#NAME?	0.69	0.92	0.77	0.97	0.99	#NAME?	-0.08	0.15	#NAME?	-0.28	-0.05	#NAME?	-0.3	-0.07	#NAME?	0	0	0.032	0	0.19	0.156	0.001	0	0.02	0.027	0	0.399	0.001	0	0.532	0.082	0.532	intronic	GRM7	.
21	34938113	rs2834681	T	C	0.91	0.92	0.92	0.91	0.37	0.94	0.93	0.55	0.55	0.54	-0.03	-0.03	-0.04	-0.02	-0.02	-0.02	0.55	0.004	0.005	0.003	0.004	0.515	0.532	0.003	0.476	0.516	0.505	0.002	0.001	0.004	0.005	0.002	0.001	0.532	intronic	RUNX1	.
21	34914641	rs28421324	T	A	0.92	0.91	0.92	0.89	0.36	0.89	0.92	0.55	0.56	0.54	0.02	0.03	0.01	-0.01	0	-0.03	0.56	0.001	0.004	0.002	0.004	0.51	0.457	0.002	0.467	0.532	0.487	0.003	0.002	0.004	0.004	0.004	0.001	0.532	intronic	RUNX1	.
17	33858580	rs12453340	C	T	0.43	0.74	0.43	0.35	0.15	0.31	0.63	0.59	0.28	0.2	0.43	0.12	0.04	0.11	-0.2	-0.28	0.59	0.119	0.152	0.018	0.259	0.392	0.066	0.185	0.531	0.184	0.093	0.308	0.037	0.001	0.02	0.061	0.146	0.531	intronic	ASIC2	.
21	34843057	rs2268279	G	A	0.44	0.58	0.41	0.41	0.05	0.45	0.6	0.53	0.36	0.36	0.12	-0.05	-0.05	-0.02	-0.19	-0.19	0.53	0.026	0.061	0.003	0.048	0.518	0.367	0.036	0.531	0.276	0.289	0.023	0.003	0.001	0.004	0.076	0.063	0.531	intronic	RUNX1	.
21	34952209	rs6517266	C	T	0.92	0.92	0.91	0.92	0.37	0.94	0.94	0.55	0.55	0.55	-0.03	-0.03	-0.03	-0.02	-0.02	-0.02	0.55	0.004	0.004	0.003	0.005	0.522	0.531	0.004	0.476	0.51	0.519	0.002	0.003	0.001	0.004	0	0.001	0.531	intronic	RUNX1	.
15	25358606	rs1557832	T	C	0.73	0.67	0.71	0.76	0.18	0.78	0.58	0.49	0.53	0.58	-0.11	-0.07	-0.03	0.09	0.13	0.17	0.58	0.006	0.002	0.005	0.015	0.29	0.531	0.084	0.408	0.432	0.503	0.023	0.01	0.003	0.013	0.031	0.071	0.531	intronic	UBE3A	.
15	25383849	rs8042058	T	C	0.73	0.67	0.71	0.76	0.18	0.78	0.58	0.49	0.53	0.58	-0.11	-0.07	-0.02	0.09	0.13	0.18	0.58	0.006	0.003	0.006	0.016	0.29	0.531	0.084	0.408	0.428	0.505	0.023	0.011	0.004	0.013	0.029	0.072	0.531	intronic	UBE3A	.
3	7083799	rs9856068	A	C	0.89	0.79	0.93	0.88	0.38	0.95	0.82	0.41	0.55	0.51	-0.16	-0.02	-0.07	-0.03	0.11	0.07	0.55	0.039	0.096	0.009	0.038	0.331	0.53	0.077	0.28	0.529	0.455	0.119	0.001	0.021	0.003	0.058	0.016	0.53	intronic	GRM7	.
21	34941321	rs8126567	C	T	0.41	0.56	0.39	0.35	0.03	0.46	0.53	0.53	0.36	0.31	0.1	-0.07	-0.12	0.03	-0.14	-0.19	0.53	0.029	0.042	0	0.071	0.475	0.406	0.005	0.53	0.3	0.255	0.009	0.006	0.022	0.005	0.035	0.061	0.53	intronic	RUNX1	.
19	48746538	rs8102032	C	T	0.55	0.88	0.54	0.46	0.27	0.42	0.83	0.61	0.27	0.18	0.46	0.12	0.04	0.05	-0.28	-0.37	0.61	0.141	0.218	0.01	0.3	0.467	0.041	0.296	0.53	0.133	0.067	0.36	0.025	0.001	0.006	0.161	0.242	0.53	UTR5	IZUMO1	.
17	33179477	rs319781	C	T	0.45	0.54	0.46	0.44	0.02	0.39	0.51	0.51	0.43	0.42	0.14	0.06	0.05	0.03	-0.05	-0.07	0.51	0.002	0.001	0.001	0.011	0.467	0.35	0.021	0.529	0.396	0.356	0.029	0.008	0	0.006	0.001	0.006	0.529	intronic	ASIC2	.
3	7373788	rs61489802	T	C	0.87	0.99	0.85	0.88	0.45	0.84	1	0.54	0.39	0.42	0.15	0.01	0.04	0	-0.15	-0.12	0.54	0.039	0.1	0.001	0.072	0.529	0.273	0.147	0.486	0.302	0.358	0.122	0.003	0.004	0.006	0.118	0.086	0.529	intronic	GRM7	.
7	80665288	rs3211913	G	A	0.98	0.93	0.97	0.97	0.46	0.97	0.94	0.47	0.51	0.51	-0.04	0	0	-0.01	0.03	0.03	0.51	0.005	0.008	0.003	0.015	0.424	0.469	0.004	0.389	0.507	0.528	0.007	0.004	0.004	0.005	0.005	0.011	0.528	intronic	CD36	.
16	53951361	rs12925189	G	A	0.49	0.25	0.45	0.53	0.03	0.58	0.31	0.22	0.41	0.5	-0.33	-0.13	-0.05	-0.06	0.14	0.22	0.5	0.064	0.083	0.009	0.149	0.24	0.528	0.133	0.194	0.362	0.438	0.198	0.027	0	0.004	0.039	0.093	0.528	intronic	FTO	.
7	127206990	rs886004	A	G	0.49	0.77	0.44	0.47	0.17	0.38	0.73	0.6	0.28	0.3	0.38	0.06	0.08	0.04	-0.28	-0.26	0.6	0.085	0.18	0.002	0.156	0.482	0.108	0.211	0.528	0.155	0.176	0.245	0.003	0.009	0.003	0.15	0.128	0.528	intronic	GRM8	.
1	8970905	rs3737665	C	T	0.34	0.65	0.33	0.32	0.09	0.22	0.61	0.56	0.23	0.23	0.43	0.11	0.1	0.04	-0.29	-0.29	0.56	0.101	0.192	0.003	0.188	0.456	0.054	0.272	0.527	0.14	0.141	0.327	0.024	0.026	0.002	0.149	0.146	0.527	exonic	CA6	synonymous
7	126753126	rs2283070	C	T	0.47	0.69	0.45	0.44	0.11	0.37	0.49	0.58	0.34	0.33	0.32	0.07	0.06	0.2	-0.04	-0.05	0.58	0.052	0.11	0.003	0.101	0.291	0.17	0.022	0.527	0.219	0.228	0.169	0.003	0.006	0.067	0.002	0	0.527	intronic	GRM8	.
3	7477166	rs9877337	T	G	0.97	1	0.95	0.96	0.47	1	1	0.53	0.48	0.5	0	-0.05	-0.04	0	-0.05	-0.04	0.53	0.015	0.039	0.003	0.02	0.525	0.52	0	0.483	0.447	0.505	0	0.045	0.024	0	0.046	0.025	0.525	intronic	GRM7	.
6	154201623	rs9397181	G	A	0.5	0.57	0.6	0.38	0.05	0.14	0.61	0.52	0.55	0.33	0.43	0.46	0.24	-0.04	-0.01	-0.23	0.55	0.074	0.002	0.107	0.072	0.525	0.042	0.377	0.52	0.507	0.249	0.351	0.374	0.124	0.004	0.004	0.1	0.525	intronic	IPCEF1;OPRM1	.
17	33422710	rs7213646	C	T	0.4	0.8	0.36	0.38	0.21	0.29	0.81	0.59	0.16	0.18	0.51	0.07	0.09	0	-0.44	-0.42	0.59	0.155	0.302	0.001	0.267	0.524	0.014	0.417	0.51	0.054	0.075	0.398	0.008	0.019	0.006	0.322	0.286	0.524	intronic	ASIC2	.
7	126607850	rs7790862	C	G	0.52	0.72	0.47	0.5	0.13	0.32	0.48	0.59	0.34	0.37	0.4	0.14	0.17	0.25	-0.01	0.02	0.59	0.048	0.107	0.001	0.077	0.246	0.099	0.042	0.524	0.225	0.265	0.25	0.035	0.058	0.096	0.004	0.004	0.524	intronic	GRM8	.
2	25157704	rs1866146	A	G	0.5	0.6	0.57	0.44	0.09	0.33	0.67	0.51	0.48	0.36	0.27	0.24	0.11	-0.07	-0.09	-0.22	0.51	0.031	0.005	0.041	0.042	0.524	0.165	0.194	0.473	0.422	0.257	0.127	0.122	0.02	0.004	0.007	0.09	0.524	UTR3	EFR3B	.
3	7330570	rs12638935	A	G	0.6	0.58	0.56	0.63	0.05	0.54	0.51	0.53	0.52	0.58	0.04	0.03	0.09	0.07	0.05	0.12	0.58	0.002	0.005	0.001	0	0.423	0.455	0.003	0.523	0.473	0.509	0.003	0	0.011	0.002	0.006	0.021	0.523	intronic	GRM7	.
7	22729088	rs1554606	T	G	0.81	0.97	0.87	0.72	0.69	0.47	1	0.28	0.19	0.03	0.5	0.4	0.25	-0.03	-0.12	-0.28	0.5	0.099	0.05	0.067	0.174	0.296	0.087	0.523	0.221	0.099	0.001	0.442	0.325	0.119	0.011	0.096	0.232	0.523	intronic	IL6	.
6	154097279	rs3798683	G	A	0.42	0.45	0.53	0.33	0	0.14	0.33	0.45	0.53	0.33	0.31	0.4	0.19	0.11	0.2	-0.01	0.53	0.061	0.024	0.096	0.018	0.337	0.138	0.099	0.491	0.523	0.292	0.204	0.311	0.091	0.016	0.091	0.004	0.523	intronic	OPRM1	.
7	141782330	rs12703407	C	T	0.44	0.73	0.41	0.4	0.14	0.45	0.68	0.59	0.27	0.26	0.28	-0.04	-0.05	0.04	-0.28	-0.29	0.59	0.088	0.164	0.003	0.179	0	0	0	0.522	0.162	0.147	0.132	0.002	0.001	0.002	0.133	0.147	0.522	intergenic	TAS2R4;TAS2R5	.
10	113074873	rs7908628	C	G	0.42	0.71	0.39	0.38	0.14	0.3	0.58	0.57	0.25	0.24	0.41	0.09	0.08	0.13	-0.19	-0.2	0.57	0.106	0.196	0.003	0.206	0.344	0.067	0.142	0.522	0.135	0.125	0.298	0.012	0.009	0.038	0.068	0.076	0.522	intronic	TCF7L2	.
17	33182840	rs319782	A	G	0.45	0.53	0.45	0.45	0.02	0.39	0.51	0.51	0.42	0.43	0.14	0.05	0.06	0.02	-0.07	-0.06	0.51	0	0.002	0.003	0.005	0.472	0.35	0.024	0.521	0.385	0.365	0.026	0.005	0.002	0.006	0.001	0.004	0.521	intronic	ASIC2	.
21	34819349	rs1003314	G	C	0.91	0.98	0.9	0.89	0.47	0.93	1	0.51	0.43	0.42	0.06	-0.03	-0.04	-0.02	-0.1	-0.11	0.51	0.021	0.053	0.003	0.054	0.52	0.39	0.068	0.456	0.354	0.356	0.03	0.003	0.004	0.011	0.088	0.087	0.52	intronic	RUNX1	.
21	34819011	rs2834647	T	C	0.97	0.99	0.98	0.95	0.47	0.96	1	0.52	0.51	0.48	0.03	0.02	-0.01	-0.01	-0.02	-0.05	0.52	0.009	0.003	0.005	0.019	0.52	0.442	0.037	0.467	0.514	0.472	0.016	0	0.003	0.003	0.017	0.036	0.52	intronic	RUNX1	.
17	33391219	rs1394389	G	A	0.4	0.74	0.4	0.31	0.37	0.2	0.79	0.37	0.03	-0.06	0.55	0.2	0.11	-0.05	-0.39	-0.49	0.55	0.144	0.206	0.01	0.299	0.304	0.066	0.519	0.227	0.004	0.005	0.448	0.076	0.027	0.004	0.279	0.373	0.519	intronic	ASIC2	.
1	8968915	rs12033389	G	A	0.34	0.64	0.34	0.32	0.09	0.22	0.61	0.55	0.24	0.23	0.43	0.12	0.1	0.03	-0.28	-0.29	0.55	0.095	0.175	0.003	0.182	0.456	0.054	0.272	0.519	0.148	0.14	0.319	0.029	0.025	0.003	0.14	0.147	0.519	intronic	CA6	.
1	167878991	rs203843	A	T	0.96	0.93	0.97	0.95	0.47	0.92	0.96	0.46	0.51	0.48	0.01	0.05	0.03	-0.02	0.02	-0.01	0.51	0.007	0.016	0.011	0.005	0.444	0.387	0.005	0.384	0.518	0.457	0.005	0.027	0.001	0.002	0.002	0.002	0.518	intronic	ADCY10	.
17	33189883	rs319784	T	C	0.46	0.54	0.45	0.45	0.03	0.39	0.52	0.51	0.42	0.42	0.14	0.06	0.06	0.01	-0.07	-0.07	0.51	0.001	0.003	0.003	0.008	0.474	0.34	0.028	0.518	0.381	0.355	0.029	0.006	0.001	0.006	0.003	0.008	0.518	intronic	ASIC2	.
3	7001304	rs9879829	T	C	0.49	0.6	0.42	0.49	0.06	0.55	0.56	0.54	0.36	0.43	0.05	-0.13	-0.05	0.04	-0.15	-0.07	0.54	0.02	0.052	0.008	0.013	0.456	0.44	0.005	0.518	0.282	0.355	0.002	0.027	0.001	0.005	0.036	0.005	0.518	intronic	GRM7	.
5	1407631	rs3776510	A	G	0.8	0.96	0.8	0.79	0.38	0.74	0.9	0.58	0.41	0.41	0.22	0.06	0.05	0.06	-0.1	-0.11	0.58	0.046	0.11	0.003	0.099	0.441	0.22	0.079	0.516	0.285	0.306	0.164	0.002	0.007	0.026	0.041	0.033	0.516	intronic	SLC6A3	.
14	72433315	rs7153117	A	G	0.34	0.66	0.31	0.32	0.12	0.34	0.69	0.54	0.19	0.21	0.32	-0.03	-0.02	-0.04	-0.39	-0.37	0.54	0.088	0.169	0.003	0.167	0.515	0.135	0.215	0.455	0.107	0.108	0.144	0.003	0.003	0.004	0.241	0.239	0.515	intronic	RGS6	.
21	35006179	rs6517269	C	T	0.9	0.99	0.94	0.87	0.47	0.66	1	0.52	0.48	0.4	0.34	0.29	0.21	0	-0.05	-0.13	0.52	0.052	0.025	0.036	0.088	0.515	0.065	0.333	0.471	0.455	0.307	0.292	0.251	0.111	0.006	0.033	0.104	0.515	intronic	RUNX1	.
18	60376948	rs1943217	G	T	0.73	0.85	0.72	0.73	0.31	0.71	0.89	0.53	0.41	0.42	0.14	0.01	0.03	-0.04	-0.17	-0.16	0.53	0.016	0.042	0.003	0.033	0.514	0.263	0.099	0.432	0.268	0.289	0.046	0.004	0.003	0.004	0.091	0.077	0.514	intergenic	MC4R;CDH20	.
18	60376357	rs8086617	G	A	0.73	0.85	0.72	0.74	0.31	0.71	0.89	0.53	0.41	0.42	0.14	0.01	0.03	-0.04	-0.17	-0.15	0.53	0.016	0.042	0.002	0.031	0.514	0.263	0.099	0.432	0.268	0.295	0.046	0.004	0.002	0.004	0.091	0.074	0.514	intergenic	MC4R;CDH20	.
7	22730530	rs2069845	G	A	0.8	0.98	0.86	0.72	0.67	0.47	0.99	0.31	0.19	0.05	0.51	0.39	0.25	-0.01	-0.13	-0.27	0.51	0.097	0.064	0.057	0.181	0.299	0.075	0.514	0.247	0.103	0.003	0.454	0.314	0.124	0.004	0.093	0.22	0.514	intronic	IL6	.
7	22726815	rs7802308	T	A	0.51	0.65	0.59	0.4	0.37	0.15	0.73	0.29	0.22	0.03	0.51	0.44	0.25	-0.08	-0.15	-0.33	0.51	0.068	0.005	0.068	0.122	0.236	0.114	0.514	0.143	0.084	0.003	0.425	0.321	0.127	0.012	0.046	0.209	0.514	upstream	IL6	.
15	25334699	rs6576418	T	C	0.73	0.67	0.71	0.75	0.21	0.8	0.58	0.47	0.5	0.55	-0.12	-0.09	-0.04	0.09	0.13	0.17	0.55	0.005	0.003	0.005	0.014	0.253	0.513	0.098	0.366	0.392	0.464	0.033	0.018	0.001	0.013	0.029	0.068	0.513	intergenic	SNORD109B(dist=56290),UBE3A(dist=2550)	.
17	33392426	rs4795775	G	A	0.41	0.77	0.42	0.33	0.63	0.2	0.79	0.14	-0.21	-0.3	0.56	0.22	0.12	-0.03	-0.37	-0.47	0.56	0.143	0.203	0.011	0.3	0.057	0.311	0.513	0.029	0.087	0.166	0.467	0.09	0.034	0.001	0.252	0.35	0.513	intronic	ASIC2	.
17	33397339	rs9895229	C	T	0.4	0.75	0.42	0.32	0.36	0.2	0.79	0.39	0.05	-0.04	0.55	0.22	0.12	-0.04	-0.37	-0.47	0.55	0.141	0.2	0.011	0.294	0.308	0.059	0.513	0.245	0.001	0	0.457	0.086	0.033	0.001	0.259	0.354	0.513	intronic	ASIC2	.
6	154005168	rs1304724	G	A	0.58	0.64	0.63	0.51	0.09	0.38	0.62	0.56	0.54	0.43	0.26	0.24	0.13	0.03	0.01	-0.1	0.56	0.019	0.005	0.026	0.023	0.469	0.216	0.098	0.512	0.472	0.334	0.112	0.117	0.031	0.006	0.003	0.016	0.512	intergenic	MIR7641-2;OPRM1	.
6	154015291	rs1294091	A	G	0.42	0.44	0.53	0.36	0	0.18	0.36	0.44	0.53	0.36	0.26	0.35	0.18	0.08	0.17	0	0.53	0.038	0.022	0.061	0.003	0.367	0.185	0.075	0.484	0.512	0.325	0.135	0.241	0.074	0.003	0.062	0.004	0.512	intronic	OPRM1	.
15	25403650	rs12148726	C	T	0.73	0.67	0.71	0.75	0.19	0.78	0.58	0.48	0.51	0.56	-0.11	-0.07	-0.03	0.09	0.13	0.17	0.56	0.006	0.003	0.005	0.014	0.271	0.512	0.084	0.387	0.41	0.483	0.023	0.011	0.003	0.013	0.029	0.07	0.512	intronic	UBE3A	.
15	25385994	rs4488416	G	A	0.73	0.67	0.71	0.75	0.19	0.78	0.57	0.48	0.51	0.56	-0.11	-0.07	-0.03	0.11	0.14	0.19	0.56	0.005	0.003	0.005	0.014	0.255	0.512	0.095	0.387	0.41	0.481	0.023	0.011	0.003	0.019	0.037	0.079	0.512	intronic	UBE3A	.
16	53761724	rs13334933	G	A	0.76	0.83	0.77	0.76	0.27	0.85	0.67	0.56	0.5	0.49	-0.03	-0.08	-0.1	0.15	0.1	0.08	0.56	0.001	0.001	0.002	0.008	0.281	0.511	0.079	0.455	0.403	0.373	0.002	0.017	0.029	0.044	0.019	0.009	0.511	intronic	FTO	.
7	45705065	rs2471273	G	A	0.64	0.48	0.72	0.59	0.13	0.41	0.32	0.36	0.59	0.46	0.08	0.31	0.18	0.17	0.4	0.27	0.59	0.051	0.124	0.025	0.034	0.097	0.186	0.014	0.247	0.51	0.372	0.002	0.17	0.065	0.036	0.27	0.144	0.51	intronic	ADCY1	.
3	7003768	rs1499161	C	A	0.42	0.59	0.36	0.44	0.06	0.5	0.57	0.53	0.3	0.38	0.09	-0.14	-0.06	0.02	-0.2	-0.13	0.53	0.037	0.093	0.012	0.033	0.462	0.391	0.004	0.51	0.22	0.303	0.009	0.036	0.002	0.006	0.08	0.025	0.51	intronic	GRM7	.
3	6894387	rs4108607	T	C	0.63	0.49	0.65	0.66	0.07	0.52	0.41	0.42	0.58	0.58	-0.03	0.13	0.14	0.08	0.24	0.25	0.58	0.02	0.042	0.003	0.045	0.263	0.388	0.021	0.389	0.51	0.51	0.005	0.032	0.034	0.011	0.11	0.114	0.51	intronic	GRM7	.
17	33389925	rs60562210	A	T	0.29	0.73	0.23	0.25	0.18	0.17	0.76	0.55	0.06	0.07	0.56	0.06	0.07	-0.03	-0.53	-0.51	0.56	0.23	0.394	0.002	0.363	0.505	0.005	0.509	0.464	0.004	0.012	0.468	0.004	0.013	0.002	0.439	0.409	0.509	intronic	ASIC2	.
7	127041811	rs2237782	T	G	0.34	0.58	0.33	0.33	0.06	0.23	0.54	0.52	0.26	0.27	0.36	0.1	0.1	0.04	-0.22	-0.21	0.52	0.069	0.127	0.003	0.14	0.427	0.098	0.186	0.509	0.183	0.168	0.241	0.021	0.015	0.001	0.087	0.098	0.509	intronic	GRM8	.
6	154016044	rs1294088	T	C	0.42	0.44	0.53	0.36	0	0.18	0.35	0.44	0.53	0.36	0.26	0.34	0.18	0.09	0.17	0	0.53	0.039	0.021	0.063	0.005	0.357	0.185	0.068	0.484	0.509	0.319	0.135	0.238	0.07	0.006	0.066	0.004	0.509	intronic	OPRM1	.
7	22728505	rs1474347	C	A	0.85	0.98	0.9	0.78	0.89	0.48	1	0.1	0.01	-0.11	0.5	0.41	0.29	-0.01	-0.1	-0.22	0.5	0.075	0.051	0.043	0.14	0.091	0.319	0.508	0.061	0.004	0.034	0.45	0.348	0.178	0.001	0.076	0.173	0.508	intronic	IL6	.
6	154016649	rs1294086	A	G	0.42	0.44	0.53	0.36	0	0.18	0.35	0.44	0.53	0.36	0.26	0.34	0.17	0.09	0.17	0	0.53	0.038	0.021	0.062	0.004	0.357	0.185	0.068	0.484	0.508	0.322	0.135	0.237	0.072	0.006	0.066	0.004	0.508	intronic	OPRM1	.
14	72568093	rs11847034	A	G	0.7	0.64	0.66	0.73	0.21	0.8	0.78	0.42	0.45	0.51	-0.16	-0.14	-0.07	-0.14	-0.12	-0.05	0.51	0.003	0.004	0.003	0.01	0.48	0.507	0.003	0.318	0.344	0.406	0.055	0.035	0.012	0.039	0.023	0.004	0.507	intergenic	RGS6;DPF3	.
16	53848459	rs8061228	C	T	0.72	0.3	0.74	0.76	0.45	0.85	0.27	-0.16	0.29	0.31	-0.55	-0.11	-0.09	0.03	0.48	0.5	0.5	0.22	0.342	0.001	0.386	0.068	0.287	0.507	0.05	0.16	0.197	0.491	0.028	0.014	0.004	0.368	0.41	0.507	intronic	FTO	.
17	33527168	rs12103532	G	T	0.94	0.98	0.91	0.96	0.46	0.99	0.99	0.51	0.45	0.5	-0.01	-0.08	-0.03	-0.01	-0.08	-0.03	0.51	0.013	0.021	0.014	0.003	0.502	0.506	0.004	0.443	0.4	0.495	0.003	0.05	0.013	0.001	0.043	0.008	0.506	intronic	ASIC2	.
17	33410403	rs1354492	T	C	0.56	0.83	0.52	0.55	0.31	0.59	0.89	0.52	0.2	0.24	0.25	-0.07	-0.03	-0.06	-0.37	-0.34	0.52	0.084	0.188	0	0.15	0.506	0.134	0.209	0.423	0.079	0.111	0.133	0.004	0.003	0.004	0.262	0.219	0.506	intronic	ASIC2	.
17	33422578	rs9904433	T	G	0.46	0.84	0.42	0.46	0.25	0.48	0.81	0.59	0.17	0.21	0.36	-0.06	-0.02	0.03	-0.39	-0.35	0.59	0.14	0.291	0.002	0.238	0.476	0.108	0.205	0.506	0.059	0.093	0.231	0.004	0.003	0.004	0.266	0.214	0.506	intronic	ASIC2	.
7	126791571	rs2299521	T	A	0.44	0.62	0.44	0.4	0.07	0.31	0.37	0.55	0.37	0.33	0.31	0.13	0.09	0.25	0.07	0.03	0.55	0.029	0.054	0.002	0.068	0.222	0.167	0.002	0.506	0.27	0.246	0.154	0.025	0.016	0.1	0.004	0	0.506	intronic	GRM8	.
7	126709079	rs7794592	C	A	0.67	0.76	0.63	0.67	0.18	0.63	0.53	0.58	0.45	0.49	0.13	0	0.04	0.23	0.1	0.14	0.58	0.014	0.038	0.005	0.009	0.238	0.347	0.014	0.506	0.323	0.395	0.03	0.004	0.001	0.096	0.01	0.04	0.506	intronic	GRM8	.
21	34944688	rs3804014	G	T	0.92	0.91	0.91	0.91	0.39	0.94	0.93	0.52	0.52	0.52	-0.04	-0.03	-0.03	-0.02	-0.02	-0.02	0.52	0.004	0.005	0.003	0.005	0.489	0.506	0.003	0.44	0.484	0.484	0.001	0.003	0.004	0.004	0.002	0.001	0.506	intronic	RUNX1	.
17	3594690	rs3744685	C	T	0.68	0.69	0.66	0.72	0.16	0.74	0.74	0.53	0.49	0.56	-0.05	-0.09	-0.02	-0.05	-0.09	-0.02	0.56	0.002	0.002	0.006	0.005	0.506	0.506	0.006	0.452	0.381	0.459	0.001	0.016	0.002	0	0.016	0.002	0.506	intronic	TRPV1	.
15	25426634	rs11633072	A	G	0.73	0.67	0.71	0.75	0.2	0.78	0.58	0.48	0.51	0.56	-0.11	-0.07	-0.03	0.09	0.13	0.17	0.56	0.005	0.002	0.004	0.014	0.265	0.506	0.084	0.38	0.41	0.478	0.023	0.009	0.003	0.013	0.032	0.07	0.506	intronic	UBE3A	.
15	25368780	rs12717754	C	T	0.73	0.67	0.72	0.75	0.2	0.78	0.57	0.48	0.52	0.56	-0.11	-0.07	-0.03	0.11	0.15	0.19	0.56	0.005	0.001	0.003	0.014	0.249	0.506	0.095	0.38	0.415	0.478	0.023	0.008	0.003	0.019	0.042	0.081	0.506	intronic	UBE3A	.
15	25380507	rs12899183	A	C	0.73	0.67	0.71	0.76	0.2	0.78	0.59	0.48	0.51	0.57	-0.11	-0.07	-0.02	0.09	0.12	0.18	0.57	0.008	0.003	0.008	0.019	0.27	0.506	0.08	0.38	0.404	0.49	0.023	0.011	0.004	0.012	0.027	0.074	0.506	intronic	UBE3A	.
15	25383596	rs6576419	G	A	0.73	0.67	0.71	0.76	0.2	0.78	0.57	0.48	0.51	0.56	-0.11	-0.07	-0.02	0.11	0.14	0.19	0.56	0.006	0.003	0.006	0.016	0.249	0.506	0.095	0.38	0.404	0.482	0.023	0.011	0.004	0.019	0.037	0.084	0.506	intronic	UBE3A	.
15	25426156	rs7496951	C	G	0.73	0.67	0.71	0.75	0.2	0.78	0.58	0.48	0.51	0.56	-0.11	-0.07	-0.03	0.09	0.13	0.17	0.56	0.005	0.002	0.004	0.014	0.265	0.506	0.084	0.38	0.41	0.478	0.023	0.009	0.003	0.013	0.032	0.07	0.506	intronic	UBE3A	.
21	34909928	rs34902592	C	T	0.41	0.55	0.39	0.36	0.04	0.45	0.52	0.52	0.35	0.32	0.1	-0.06	-0.09	0.03	-0.13	-0.17	0.52	0.022	0.037	0.002	0.054	0.456	0.381	0.007	0.505	0.288	0.257	0.009	0.003	0.012	0.006	0.031	0.048	0.505	intronic	RUNX1	.
5	1453889	rs12654851	G	T	0.35	0.56	0.34	0.27	0.06	0.13	0.41	0.51	0.29	0.21	0.43	0.21	0.14	0.15	-0.07	-0.14	0.51	0.072	0.081	0.014	0.167	0.297	0.025	0.179	0.504	0.227	0.143	0.368	0.126	0.058	0.046	0.001	0.036	0.504	intergenic	SLC6A3;LPCAT1	.
3	7007947	rs338087	A	G	0.78	0.78	0.77	0.77	0.27	0.85	0.71	0.51	0.5	0.5	-0.07	-0.08	-0.08	0.07	0.06	0.06	0.51	0.004	0.005	0.003	0.005	0.322	0.504	0.05	0.402	0.417	0.403	0.012	0.011	0.015	0.005	0.01	0.006	0.504	intronic	GRM7	.
3	6890506	rs9855167	G	T	0.76	0.85	0.74	0.74	0.26	0.68	0.79	0.59	0.48	0.48	0.17	0.07	0.06	0.06	-0.04	-0.05	0.59	0.009	0.025	0.003	0.023	0.433	0.295	0.026	0.503	0.377	0.38	0.067	0.007	0.008	0.006	0.001	0.001	0.503	intronic	GRM7	.
7	126561141	rs11981877	C	A	0.46	0.68	0.44	0.43	0.12	0.32	0.48	0.57	0.32	0.32	0.36	0.12	0.12	0.21	-0.04	-0.04	0.57	0.048	0.102	0.003	0.095	0.267	0.111	0.045	0.503	0.21	0.215	0.215	0.023	0.026	0.067	0.001	0.002	0.503	intronic	GRM8	.
7	126592399	rs12666621	A	C	0.45	0.67	0.44	0.42	0.11	0.32	0.48	0.56	0.33	0.31	0.36	0.12	0.11	0.2	-0.04	-0.05	0.56	0.047	0.096	0.003	0.096	0.275	0.117	0.045	0.503	0.216	0.212	0.207	0.023	0.022	0.062	0.001	0	0.503	intronic	GRM8	.
1	8957145	rs2274333	A	G	0.42	0.57	0.44	0.38	0.06	0.33	0.61	0.5	0.37	0.32	0.24	0.11	0.06	-0.04	-0.17	-0.23	0.5	0.025	0.032	0.001	0.064	0.502	0.197	0.144	0.493	0.291	0.238	0.112	0.02	0.003	0.004	0.054	0.091	0.502	exonic	CA6	nonsynonymous
17	33423995	rs2036535	G	A	0.45	0.82	0.42	0.45	0.25	0.46	0.83	0.57	0.18	0.2	0.35	-0.04	-0.02	-0.01	-0.4	-0.38	0.57	0.131	0.269	0	0.227	0.502	0.096	0.245	0.485	0.06	0.087	0.226	0	0.004	0.006	0.288	0.245	0.502	intronic	ASIC2	.
17	33423876	rs4572456	G	A	0.45	0.83	0.42	0.45	0.25	0.46	0.83	0.58	0.17	0.2	0.36	-0.05	-0.02	0	-0.41	-0.38	0.58	0.138	0.281	0	0.238	0.502	0.096	0.245	0.494	0.058	0.085	0.234	0.001	0.004	0.007	0.292	0.248	0.502	intronic	ASIC2	.
16	53760557	rs17525605	C	G	0.41	0.55	0.41	0.35	0.04	0.32	0.46	0.51	0.37	0.31	0.23	0.09	0.03	0.09	-0.05	-0.11	0.51	0.029	0.023	0.009	0.072	0.38	0.232	0.037	0.502	0.311	0.231	0.093	0.018	0.003	0.007	0.001	0.024	0.502	intronic	FTO	.
16	53760846	rs8055259	C	G	0.42	0.55	0.42	0.35	0.04	0.32	0.46	0.51	0.38	0.31	0.23	0.11	0.04	0.09	-0.04	-0.11	0.51	0.027	0.019	0.01	0.068	0.38	0.232	0.037	0.502	0.322	0.237	0.093	0.023	0.002	0.006	0.003	0.021	0.502	intronic	FTO	.
19	33820576	rs29938	C	T	0.47	0.74	0.49	0.41	0.19	0.32	0.71	0.56	0.31	0.22	0.42	0.17	0.08	0.03	-0.22	-0.31	0.56	0.1	0.14	0.01	0.222	0.438	0.045	0.261	0.501	0.173	0.099	0.315	0.047	0.008	0	0.1	0.175	0.501	intergenic	KCTD15;LSM14A	.
16	53850492	rs10521306	G	A	0.73	0.33	0.74	0.77	0.46	0.85	0.27	-0.13	0.29	0.31	-0.52	-0.1	-0.08	0.05	0.47	0.5	0.5	0.202	0.312	0	0.361	0.068	0.282	0.501	0.036	0.157	0.198	0.458	0.028	0.012	0.001	0.364	0.411	0.501	intronic	FTO	.
3	6903997	rs9834705	A	G	0.63	0.51	0.64	0.65	0.07	0.53	0.4	0.43	0.57	0.57	-0.02	0.11	0.12	0.1	0.24	0.25	0.57	0.014	0.028	0.003	0.032	0.258	0.399	0.028	0.404	0.496	0.501	0.005	0.021	0.025	0.018	0.104	0.111	0.501	intronic	GRM7	.
7	126981079	rs1154324	T	C	0.46	0.64	0.44	0.45	0.11	0.28	0.67	0.53	0.33	0.35	0.36	0.16	0.18	-0.03	-0.23	-0.22	0.53	0.026	0.063	0.001	0.043	0.501	0.087	0.263	0.455	0.215	0.244	0.201	0.041	0.061	0.001	0.11	0.085	0.501	intronic	GRM8	.
21	34818303	rs915572	T	C	0.96	0.99	0.98	0.94	0.49	0.92	1	0.5	0.49	0.45	0.07	0.06	0.02	-0.01	-0.02	-0.06	0.5	0.017	0.003	0.013	0.028	0.501	0.353	0.077	0.448	0.494	0.426	0.049	0.031	0.001	0.003	0.017	0.047	0.501	intronic	RUNX1	.
7	45712791	rs2461129	C	T	0.65	0.48	0.72	0.6	0.14	0.38	0.32	0.35	0.58	0.46	0.1	0.34	0.22	0.17	0.41	0.28	0.58	0.054	0.131	0.024	0.039	0.082	0.142	0.006	0.225	0.5	0.364	0.005	0.203	0.092	0.036	0.279	0.153	0.5	intronic	ADCY1	.
7	45712910	rs2471270	A	G	0.64	0.48	0.72	0.6	0.14	0.38	0.32	0.35	0.58	0.46	0.1	0.34	0.21	0.17	0.41	0.28	0.58	0.054	0.131	0.026	0.037	0.082	0.142	0.006	0.225	0.5	0.36	0.005	0.203	0.089	0.036	0.279	0.15	0.5	intronic	ADCY1	.
17	33421667	rs2221410	G	C	0.29	0.74	0.24	0.26	0.25	0.16	0.73	0.49	-0.02	0	0.58	0.08	0.1	0.01	-0.49	-0.47	0.58	0.233	0.408	0	0.359	0.363	0.021	0.487	0.369	0.002	0.003	0.5	0.009	0.025	0.006	0.401	0.354	0.5	intronic	ASIC2	.
7	127182793	rs13246600	G	A	0.4	0.78	0.35	0.35	0.2	0.24	0.67	0.58	0.15	0.15	0.54	0.11	0.11	0.11	-0.32	-0.32	0.58	0.172	0.294	0.002	0.323	0.366	0.002	0.319	0.5	0.053	0.038	0.452	0.03	0.018	0.022	0.177	0.204	0.5	intronic	GRM8	.
7	127188515	rs2299549	C	A	0.4	0.78	0.35	0.36	0.2	0.24	0.67	0.58	0.15	0.15	0.54	0.11	0.12	0.11	-0.32	-0.32	0.58	0.169	0.294	0.003	0.314	0.366	0.002	0.319	0.5	0.053	0.042	0.452	0.03	0.021	0.022	0.177	0.196	0.5	intronic	GRM8	.
7	127194453	rs2299551	T	G	0.4	0.78	0.35	0.35	0.2	0.24	0.67	0.58	0.15	0.15	0.54	0.11	0.12	0.11	-0.32	-0.32	0.58	0.168	0.29	0.002	0.314	0.366	0.002	0.319	0.5	0.056	0.042	0.452	0.032	0.021	0.022	0.173	0.196	0.5	intronic	GRM8	.
7	127194460	rs2299552	G	T	0.4	0.78	0.35	0.35	0.2	0.24	0.67	0.58	0.15	0.15	0.54	0.11	0.12	0.11	-0.32	-0.32	0.58	0.168	0.29	0.002	0.314	0.366	0.002	0.319	0.5	0.056	0.042	0.452	0.032	0.021	0.022	0.173	0.196	0.5	intronic	GRM8	.
6	154014538	rs1294092	A	G	0.43	0.44	0.53	0.36	0	0.18	0.35	0.43	0.52	0.36	0.26	0.34	0.18	0.09	0.17	0.01	0.52	0.037	0.021	0.06	0.003	0.346	0.172	0.068	0.472	0.5	0.314	0.135	0.237	0.073	0.006	0.066	0.004	0.5	intronic	OPRM1	.
15	25381246	rs12904063	T	C	0.73	0.67	0.71	0.76	0.2	0.78	0.59	0.47	0.51	0.55	-0.11	-0.07	-0.03	0.09	0.13	0.17	0.55	0.005	0.002	0.004	0.015	0.264	0.5	0.08	0.373	0.404	0.474	0.023	0.009	0.004	0.012	0.029	0.067	0.5	intronic	UBE3A	.
16	53929151	rs11864972	G	A	0.59	0.71	0.56	0.61	0.15	0.55	0.7	0.56	0.41	0.46	0.17	0.01	0.06	0.01	-0.14	-0.09	0.56	0.013	0.037	0.001	0.017	0.473	0.296	0.044	0.499	0.309	0.351	0.051	0.003	0.003	0.006	0.031	0.013	0.499	intronic	FTO	.
3	6908502	rs7644436	A	C	0.86	0.66	0.91	0.86	0.38	0.81	0.63	0.28	0.53	0.49	-0.15	0.1	0.05	0.03	0.28	0.23	0.53	0.086	0.19	0.014	0.096	0.114	0.327	0.078	0.154	0.499	0.402	0.049	0.042	0.002	0.002	0.222	0.131	0.499	intronic	GRM7	.
6	154007742	rs9397678	A	T	0.41	0.42	0.51	0.34	0	0.18	0.33	0.42	0.51	0.34	0.23	0.33	0.16	0.08	0.18	0	0.51	0.042	0.026	0.066	0.003	0.337	0.185	0.054	0.462	0.498	0.307	0.115	0.227	0.06	0.006	0.073	0.004	0.498	intergenic	MIR7641-2;OPRM1	.
21	34936279	rs928774	A	T	0.42	0.61	0.42	0.37	0.08	0.46	0.6	0.53	0.34	0.29	0.15	-0.04	-0.09	0.02	-0.18	-0.23	0.53	0.042	0.063	0.001	0.099	0.463	0.314	0.033	0.498	0.249	0.201	0.037	0.001	0.012	0.005	0.059	0.093	0.498	intronic	RUNX1	.
3	7040386	rs1240431	T	C	0.38	0.62	0.31	0.41	0.09	0.39	0.54	0.53	0.22	0.33	0.23	-0.08	0.02	0.08	-0.23	-0.13	0.53	0.076	0.18	0.025	0.072	0.382	0.222	0.039	0.497	0.127	0.235	0.096	0.011	0.002	0.007	0.104	0.024	0.497	intronic	GRM7	.
6	154244259	rs1554819	C	T	0.44	0.58	0.51	0.32	0.07	0.16	0.62	0.51	0.43	0.25	0.42	0.35	0.16	-0.04	-0.11	-0.3	0.51	0.066	0.007	0.063	0.124	0.497	0.032	0.359	0.483	0.349	0.164	0.327	0.224	0.064	0.004	0.022	0.159	0.497	intronic	IPCEF1;OPRM1	.
6	154244201	rs4314511	A	G	0.44	0.58	0.51	0.32	0.07	0.16	0.62	0.51	0.43	0.25	0.42	0.35	0.16	-0.04	-0.11	-0.3	0.51	0.068	0.007	0.066	0.128	0.497	0.032	0.359	0.483	0.349	0.16	0.327	0.223	0.061	0.004	0.022	0.163	0.497	intronic	IPCEF1;OPRM1	.
6	154243375	rs6557341	T	C	0.44	0.58	0.5	0.32	0.07	0.16	0.62	0.51	0.43	0.25	0.42	0.34	0.16	-0.04	-0.12	-0.3	0.51	0.067	0.008	0.062	0.127	0.497	0.032	0.359	0.483	0.345	0.161	0.327	0.22	0.062	0.004	0.024	0.162	0.497	intronic	IPCEF1;OPRM1	.
6	154011812	rs1294093	A	G	0.59	0.7	0.66	0.5	0.14	0.31	0.65	0.56	0.52	0.36	0.39	0.35	0.2	0.05	0.01	-0.14	0.56	0.048	0.005	0.059	0.066	0.423	0.076	0.201	0.497	0.456	0.253	0.258	0.243	0.073	0	0.001	0.035	0.497	intronic	OPRM1	.
16	53986530	rs9924983	T	C	0.49	0.2	0.54	0.51	0.56	0.4	0.03	-0.36	-0.02	-0.05	-0.2	0.14	0.11	0.17	0.51	0.48	0.51	0.094	0.204	0.001	0.165	0.496	0.046	0.334	0.23	0.003	0.003	0.082	0.035	0.016	0.139	0.448	0.402	0.496	intronic	FTO	.
3	7712146	rs332935	G	T	0.63	0.96	0.63	0.56	0.89	0.4	0.93	0.07	-0.27	-0.33	0.56	0.23	0.16	0.03	-0.31	-0.37	0.56	0.138	0.242	0.004	0.296	0.005	0.424	0.484	0.021	0.168	0.225	0.496	0.093	0.049	0	0.221	0.278	0.496	intronic	GRM7	.
3	7711543	rs332938	C	T	0.64	0.96	0.63	0.57	0.89	0.4	0.93	0.07	-0.26	-0.32	0.56	0.23	0.17	0.03	-0.3	-0.36	0.56	0.135	0.239	0.003	0.29	0.005	0.424	0.484	0.021	0.166	0.219	0.496	0.095	0.053	0	0.219	0.272	0.496	intronic	GRM7	.
3	7040936	rs6809673	A	T	0.77	0.81	0.73	0.76	0.26	0.84	0.73	0.55	0.47	0.5	-0.03	-0.11	-0.07	0.08	0	0.03	0.55	0.001	0.008	0.002	0.001	0.358	0.496	0.027	0.453	0.369	0.402	0.003	0.023	0.012	0.011	0.004	0.001	0.496	intronic	GRM7	.
17	70177590	rs236514	G	A	0.54	0.55	0.61	0.5	0.08	0.63	0.49	0.46	0.53	0.42	-0.09	-0.02	-0.13	0.06	0.12	0.01	0.53	0.009	0	0.017	0	0.331	0.496	0.037	0.426	0.436	0.323	0.008	0.002	0.03	0.002	0.022	0.004	0.496	UTR3	KCNJ2	.
17	33724056	rs1994658	A	C	0.69	0.67	0.66	0.74	0.22	0.79	0.53	0.45	0.45	0.53	-0.13	-0.13	-0.05	0.13	0.13	0.21	0.53	0.008	0.006	0.011	0.015	0.189	0.495	0.135	0.32	0.327	0.423	0.046	0.037	0.004	0.02	0.029	0.085	0.495	intronic	ASIC2	.
16	53759886	rs13333228	C	T	0.41	0.55	0.41	0.35	0.04	0.32	0.46	0.5	0.37	0.31	0.23	0.09	0.04	0.08	-0.05	-0.11	0.5	0.026	0.02	0.008	0.065	0.38	0.232	0.037	0.495	0.311	0.233	0.087	0.018	0.002	0.004	0.001	0.023	0.495	intronic	FTO	.
3	6994569	rs1154359	C	G	0.42	0.58	0.34	0.43	0.06	0.5	0.54	0.52	0.28	0.37	0.08	-0.16	-0.07	0.03	-0.2	-0.12	0.52	0.041	0.101	0.016	0.032	0.435	0.391	0.001	0.495	0.199	0.289	0.004	0.049	0.005	0.004	0.079	0.02	0.495	intronic	GRM7	.
3	7008845	rs338084	C	T	0.42	0.58	0.36	0.44	0.06	0.49	0.5	0.52	0.3	0.38	0.08	-0.13	-0.06	0.07	-0.14	-0.07	0.52	0.034	0.085	0.012	0.027	0.393	0.385	0.005	0.495	0.216	0.299	0.006	0.035	0.002	0.003	0.04	0.004	0.495	intronic	GRM7	.
7	126560967	rs17682883	G	A	0.45	0.67	0.43	0.43	0.12	0.31	0.48	0.56	0.31	0.31	0.36	0.11	0.11	0.2	-0.05	-0.05	0.56	0.048	0.104	0.003	0.093	0.267	0.107	0.049	0.495	0.199	0.209	0.213	0.02	0.026	0.062	0.002	0.001	0.495	intronic	GRM8	.
7	126557522	rs62479317	C	T	0.45	0.67	0.43	0.43	0.12	0.31	0.48	0.56	0.32	0.31	0.36	0.12	0.11	0.2	-0.04	-0.05	0.56	0.048	0.102	0.003	0.096	0.267	0.107	0.049	0.495	0.202	0.206	0.213	0.022	0.025	0.062	0.001	0	0.495	intronic	GRM8	.
6	154003065	rs12190310	G	A	0.41	0.44	0.51	0.33	0	0.18	0.33	0.44	0.51	0.33	0.26	0.33	0.15	0.1	0.17	0	0.51	0.04	0.015	0.065	0.01	0.337	0.185	0.054	0.484	0.494	0.304	0.134	0.223	0.06	0.013	0.071	0.004	0.494	intergenic	MIR7641-2;OPRM1	.
7	22717651	rs6963591	C	A	0.6	0.61	0.69	0.52	0.13	0.53	0.7	0.48	0.55	0.39	0.09	0.16	-0.01	-0.09	-0.01	-0.18	0.55	0.03	0.003	0.049	0.015	0.493	0.295	0.057	0.399	0.444	0.259	0.007	0.038	0.003	0.014	0.002	0.07	0.493	intergenic	MGC87042(dist=217369),IL6(dist=9496)	.
7	22718224	rs1546763	A	G	0.6	0.63	0.69	0.51	0.13	0.53	0.7	0.49	0.55	0.38	0.1	0.16	-0.01	-0.07	-0.01	-0.19	0.55	0.035	0	0.055	0.025	0.493	0.295	0.057	0.415	0.444	0.249	0.012	0.038	0.002	0.008	0.002	0.077	0.493	intergenic	MGC87042(dist=217942),IL6(dist=8923)	.
17	33421822	rs11080219	T	C	0.29	0.74	0.24	0.27	0.25	0.17	0.73	0.49	-0.01	0.01	0.58	0.07	0.1	0.01	-0.49	-0.46	0.58	0.226	0.403	0.001	0.346	0.363	0.018	0.48	0.369	0.003	0.003	0.493	0.008	0.027	0.006	0.396	0.342	0.493	intronic	ASIC2	.
6	34078141	rs4605866	T	C	0.65	0.4	0.68	0.71	0.13	0.66	0.5	0.27	0.55	0.58	-0.26	0.03	0.06	-0.09	0.19	0.22	0.58	0.091	0.156	0.002	0.184	0.26	0.445	0.047	0.165	0.466	0.493	0.124	0.002	0.003	0.014	0.069	0.09	0.493	intronic	GRM4	.
9	6650993	rs2988419	G	T	0.42	0.72	0.43	0.37	0.55	0.16	0.68	0.17	-0.12	-0.18	0.56	0.27	0.21	0.04	-0.26	-0.31	0.56	0.1	0.157	0.003	0.214	0.032	0.278	0.434	0.057	0.026	0.059	0.492	0.147	0.099	0.002	0.12	0.173	0.492	intergenic	GLDC;KDM4C	.
12	11176054	rs1863848	C	T	0.66	0.7	0.69	0.61	0.19	0.61	0.77	0.5	0.5	0.42	0.09	0.08	0	-0.07	-0.08	-0.15	0.5	0.008	0.005	0.012	0.011	0.492	0.304	0.051	0.42	0.408	0.306	0.013	0.015	0.004	0.005	0.006	0.045	0.492	intergenic	LOC100129361(dist=2930),TAS2R42(dist=9946)	.
12	11180118	rs34648613	T	A	0.67	0.72	0.69	0.63	0.19	0.61	0.77	0.52	0.5	0.44	0.1	0.08	0.02	-0.05	-0.08	-0.14	0.52	0.006	0.004	0.007	0.011	0.492	0.304	0.051	0.44	0.408	0.325	0.021	0.015	0.002	0	0.006	0.035	0.492	intergenic	SMIM10L1;TAS2R42	.
12	11178495	rs7350611	T	C	0.66	0.7	0.69	0.62	0.19	0.61	0.77	0.51	0.5	0.42	0.09	0.08	0.01	-0.06	-0.08	-0.15	0.51	0.007	0.005	0.01	0.011	0.492	0.304	0.051	0.428	0.408	0.313	0.016	0.015	0.003	0.003	0.006	0.041	0.492	intergenic	SMIM10L1;TAS2R42	.
3	7202487	rs7613638	C	T	0.73	0.84	0.72	0.72	0.26	0.71	0.83	0.58	0.45	0.45	0.13	0	0	0.01	-0.12	-0.12	0.58	0.011	0.024	0.003	0.03	0.492	0.332	0.038	0.47	0.34	0.324	0.028	0.004	0.004	0.005	0.033	0.039	0.492	intronic	GRM7	.
7	126711941	rs6467095	C	T	0.67	0.76	0.63	0.67	0.19	0.63	0.53	0.57	0.45	0.48	0.13	0.01	0.04	0.23	0.1	0.14	0.57	0.013	0.036	0.004	0.009	0.226	0.334	0.014	0.492	0.315	0.383	0.03	0.004	0.001	0.096	0.011	0.04	0.492	intronic	GRM8	.
17	34118132	rs2887319	C	T	0.9	0.96	0.89	0.91	0.4	0.9	0.9	0.56	0.49	0.51	0.06	-0.01	0.01	0.06	-0.01	0.01	0.56	0.007	0.021	0	0.009	0.433	0.424	0.005	0.491	0.436	0.48	0.019	0.004	0.002	0.016	0.004	0.003	0.491	intronic	ASIC2	.
3	6896321	rs9882865	G	A	0.75	0.86	0.74	0.73	0.27	0.67	0.76	0.59	0.48	0.46	0.18	0.07	0.06	0.09	-0.02	-0.03	0.59	0.011	0.024	0.003	0.029	0.389	0.278	0.016	0.491	0.368	0.354	0.071	0.009	0.005	0.016	0.003	0.002	0.491	intronic	GRM7	.
7	127181229	rs11764958	T	C	0.4	0.77	0.35	0.37	0.2	0.24	0.67	0.57	0.15	0.16	0.54	0.11	0.13	0.1	-0.32	-0.31	0.57	0.159	0.285	0.003	0.294	0.366	0.002	0.319	0.491	0.053	0.048	0.444	0.03	0.026	0.018	0.177	0.186	0.491	intronic	GRM8	.
7	127178823	rs12706766	G	A	0.39	0.77	0.35	0.35	0.2	0.24	0.67	0.57	0.15	0.15	0.54	0.12	0.12	0.1	-0.32	-0.32	0.57	0.164	0.282	0.002	0.31	0.366	0.002	0.319	0.491	0.055	0.04	0.444	0.031	0.02	0.018	0.174	0.2	0.491	intronic	GRM8	.
7	127175581	rs1361960	A	G	0.4	0.77	0.35	0.36	0.2	0.24	0.67	0.57	0.15	0.15	0.54	0.11	0.12	0.1	-0.32	-0.32	0.57	0.163	0.285	0.003	0.306	0.366	0.002	0.319	0.491	0.053	0.042	0.444	0.03	0.021	0.018	0.177	0.196	0.491	intronic	GRM8	.
7	127154677	rs1419425	A	G	0.4	0.77	0.36	0.36	0.2	0.24	0.67	0.57	0.16	0.15	0.54	0.12	0.12	0.1	-0.32	-0.32	0.57	0.161	0.278	0.002	0.303	0.366	0.002	0.319	0.491	0.057	0.043	0.444	0.033	0.022	0.018	0.171	0.194	0.491	intronic	GRM8	.
7	127182209	rs2188184	G	A	0.39	0.77	0.35	0.35	0.2	0.24	0.67	0.57	0.15	0.15	0.54	0.11	0.11	0.1	-0.32	-0.32	0.57	0.166	0.285	0.002	0.313	0.366	0.002	0.319	0.491	0.053	0.038	0.444	0.03	0.018	0.018	0.177	0.203	0.491	intronic	GRM8	.
7	127152110	rs2237795	A	G	0.4	0.77	0.36	0.35	0.2	0.24	0.67	0.57	0.16	0.15	0.54	0.13	0.12	0.1	-0.31	-0.32	0.57	0.162	0.273	0.001	0.311	0.366	0.002	0.319	0.491	0.06	0.039	0.444	0.035	0.019	0.018	0.166	0.201	0.491	intronic	GRM8	.
7	127152416	rs2237797	T	G	0.4	0.77	0.36	0.36	0.2	0.24	0.67	0.57	0.15	0.15	0.54	0.12	0.12	0.1	-0.32	-0.32	0.57	0.162	0.281	0.002	0.306	0.366	0.002	0.319	0.491	0.056	0.042	0.444	0.032	0.021	0.018	0.173	0.196	0.491	intronic	GRM8	.
7	127189568	rs2283099	T	C	0.4	0.77	0.34	0.36	0.2	0.24	0.67	0.57	0.14	0.16	0.54	0.11	0.12	0.1	-0.33	-0.31	0.57	0.164	0.293	0.003	0.302	0.366	0.002	0.319	0.491	0.049	0.044	0.444	0.026	0.023	0.018	0.184	0.193	0.491	intronic	GRM8	.
7	127198365	rs886002	G	T	0.4	0.77	0.36	0.36	0.2	0.24	0.67	0.57	0.16	0.16	0.54	0.12	0.13	0.1	-0.31	-0.31	0.57	0.159	0.277	0.003	0.299	0.366	0.002	0.319	0.491	0.058	0.045	0.444	0.034	0.024	0.018	0.17	0.19	0.491	intronic	GRM8	.
15	25442741	rs11630723	A	T	0.73	0.71	0.75	0.73	0.23	0.8	0.62	0.48	0.52	0.49	-0.09	-0.05	-0.08	0.09	0.13	0.1	0.52	0.003	0.003	0.004	0.004	0.266	0.49	0.072	0.375	0.407	0.401	0.017	0.007	0.008	0.012	0.028	0.026	0.49	intergenic	UBE3A;ATP10A	.
11	47641380	rs7120548	T	C	0.46	0.17	0.52	0.42	0	0.34	0.32	0.17	0.52	0.42	-0.16	0.18	0.08	-0.14	0.21	0.1	0.52	0.094	0.219	0.019	0.119	0.317	0.345	0.004	0.207	0.49	0.377	0.058	0.065	0.01	0.043	0.083	0.019	0.49	intronic	MTCH2	.
16	53755701	rs1108103	T	G	0.74	0.79	0.74	0.76	0.26	0.83	0.66	0.52	0.48	0.49	-0.05	-0.09	-0.08	0.13	0.09	0.1	0.52	0.002	0.001	0.003	0.003	0.264	0.489	0.074	0.417	0.369	0.385	0.002	0.02	0.015	0.031	0.013	0.019	0.489	intronic	FTO	.
19	33822483	rs865637	C	T	0.49	0.65	0.54	0.41	0.13	0.32	0.63	0.52	0.41	0.28	0.33	0.22	0.09	0.02	-0.09	-0.22	0.52	0.056	0.037	0.026	0.128	0.421	0.098	0.169	0.488	0.294	0.167	0.217	0.079	0.011	0.001	0.016	0.091	0.488	intergenic	KCTD15;LSM14A	.
17	33004407	rs7223092	C	T	0.76	0.95	0.78	0.77	0.41	0.85	0.95	0.53	0.36	0.36	0.09	-0.08	-0.08	0	-0.17	-0.17	0.53	0.045	0.098	0.003	0.104	0.488	0.341	0.043	0.465	0.245	0.233	0.043	0.014	0.019	0.006	0.101	0.108	0.488	intergenic	SPACA3;ASIC2	.
3	7509427	rs924353	T	C	0.44	0.66	0.43	0.39	0.13	0.38	0.69	0.52	0.3	0.25	0.28	0.05	0	-0.04	-0.26	-0.31	0.52	0.057	0.096	0.001	0.126	0.488	0.148	0.173	0.456	0.179	0.145	0.132	0.001	0.004	0.003	0.132	0.166	0.488	intronic	GRM7	.
7	127000579	rs4728060	A	G	0.44	0.67	0.38	0.44	0.11	0.34	0.67	0.56	0.27	0.33	0.33	0.04	0.11	0	-0.29	-0.22	0.56	0.052	0.126	0.007	0.068	0.488	0.136	0.189	0.479	0.162	0.228	0.163	0.001	0.02	0.005	0.15	0.088	0.488	intronic	GRM8	.
17	33376354	rs905754	G	A	0.41	0.72	0.42	0.32	0.57	0.22	0.79	0.15	-0.15	-0.25	0.5	0.2	0.1	-0.07	-0.37	-0.47	0.5	0.119	0.16	0.013	0.256	0.099	0.224	0.487	0.034	0.048	0.117	0.387	0.072	0.021	0.012	0.253	0.354	0.487	intronic	ASIC2	.
7	127105756	rs1361963	C	T	0.58	0.79	0.5	0.58	0.23	0.6	0.73	0.56	0.27	0.35	0.19	-0.1	-0.02	0.05	-0.23	-0.15	0.56	0.065	0.155	0.004	0.101	0.4	0.244	0.034	0.487	0.15	0.211	0.084	0.011	0.003	0.007	0.092	0.048	0.487	intronic	GRM8	.
7	127097692	rs4141410	G	A	0.58	0.79	0.5	0.59	0.23	0.6	0.73	0.56	0.27	0.36	0.19	-0.1	-0.01	0.05	-0.23	-0.14	0.56	0.066	0.159	0.008	0.094	0.4	0.244	0.034	0.487	0.147	0.221	0.084	0.012	0.004	0.007	0.095	0.043	0.487	intronic	GRM8	.
7	127105496	rs6975798	T	C	0.58	0.79	0.5	0.59	0.23	0.6	0.73	0.56	0.27	0.36	0.19	-0.1	-0.01	0.05	-0.23	-0.14	0.56	0.067	0.159	0.006	0.098	0.4	0.244	0.034	0.487	0.147	0.215	0.084	0.012	0.003	0.007	0.095	0.046	0.487	intronic	GRM8	.
7	45724155	rs2461125	T	A	0.64	0.5	0.7	0.62	0.12	0.47	0.4	0.38	0.58	0.5	0.03	0.22	0.14	0.1	0.3	0.22	0.58	0.033	0.083	0.007	0.035	0.18	0.261	0.007	0.278	0.487	0.405	0.007	0.087	0.039	0.007	0.154	0.091	0.487	ncRNA_exonic	SEPT7P2	.
18	60361689	rs7244966	T	C	0.89	0.9	0.89	0.91	0.38	0.89	0.93	0.52	0.5	0.52	0.01	0	0.02	-0.03	-0.04	-0.02	0.52	0.001	0.001	0.004	0.004	0.486	0.424	0.004	0.426	0.412	0.483	0.005	0.002	0.002	0.001	0.013	0.001	0.486	intergenic	PMAIP1;MC4R	.
17	34020838	rs12602899	C	T	0.51	0.36	0.54	0.44	0	0.47	0.39	0.36	0.53	0.44	-0.11	0.07	-0.03	-0.03	0.14	0.05	0.53	0.017	0.043	0.01	0.007	0.385	0.468	0.006	0.412	0.486	0.397	0.012	0.003	0.003	0.005	0.033	0.003	0.486	intronic	ASIC2	.
5	1401465	rs11133767	T	C	0.79	0.96	0.77	0.77	0.41	0.65	0.89	0.55	0.36	0.36	0.31	0.12	0.12	0.07	-0.12	-0.12	0.55	0.054	0.13	0.002	0.112	0.394	0.104	0.143	0.486	0.223	0.252	0.246	0.024	0.038	0.033	0.048	0.035	0.486	intronic	SLC6A3	.
7	45689481	rs2461124	G	A	0.65	0.47	0.71	0.63	0.13	0.47	0.36	0.34	0.57	0.49	-0.01	0.23	0.15	0.11	0.34	0.26	0.57	0.052	0.126	0.006	0.067	0.129	0.24	0.02	0.217	0.485	0.403	0.005	0.099	0.048	0.007	0.204	0.134	0.485	intronic	ADCY1	.
17	33417654	rs4794949	A	T	0.29	0.74	0.23	0.26	0.21	0.17	0.73	0.53	0.02	0.05	0.57	0.06	0.09	0.01	-0.5	-0.47	0.57	0.231	0.406	0	0.359	0.424	0	0.479	0.427	0.003	0.003	0.485	0.005	0.019	0.006	0.404	0.36	0.485	intronic	ASIC2	.
17	33417453	rs4795780	C	T	0.29	0.74	0.24	0.26	0.21	0.17	0.73	0.53	0.02	0.05	0.57	0.06	0.09	0.01	-0.5	-0.47	0.57	0.23	0.403	0	0.357	0.424	0	0.479	0.427	0.003	0.004	0.485	0.006	0.02	0.006	0.402	0.358	0.485	intronic	ASIC2	.
12	11019247	rs10734843	A	G	0.87	0.97	0.88	0.84	0.45	0.86	0.97	0.52	0.42	0.39	0.11	0.01	-0.02	0	-0.1	-0.13	0.52	0.028	0.045	0.003	0.072	0.485	0.309	0.07	0.453	0.352	0.295	0.063	0.003	0.002	0.007	0.049	0.079	0.485	intronic	PRH1,PRR4	.
12	11006129	rs10772414	C	G	0.87	0.97	0.88	0.83	0.45	0.86	0.97	0.52	0.43	0.38	0.11	0.02	-0.03	0	-0.09	-0.14	0.52	0.031	0.041	0.006	0.075	0.485	0.309	0.07	0.453	0.362	0.288	0.063	0.001	0.001	0.007	0.044	0.082	0.485	intronic	PRH1,PRR4	.
12	11018238	rs10732561	T	G	0.88	0.97	0.88	0.85	0.45	0.86	0.97	0.52	0.43	0.39	0.11	0.02	-0.02	0	-0.09	-0.13	0.52	0.023	0.032	0.003	0.058	0.485	0.309	0.07	0.442	0.363	0.304	0.053	0.001	0.003	0.006	0.044	0.073	0.485	intronic	PRH1,PRR4	.
17	33808171	rs4387636	A	G	0.55	0.7	0.58	0.47	0.15	0.26	0.71	0.54	0.43	0.32	0.44	0.33	0.21	-0.02	-0.13	-0.24	0.54	0.039	0.018	0.023	0.087	0.484	0.029	0.341	0.475	0.33	0.205	0.322	0.199	0.093	0.006	0.027	0.103	0.484	intronic	ASIC2	.
16	53857289	rs9939200	A	G	0.36	0.71	0.31	0.32	0.72	0.18	0.75	-0.01	-0.41	-0.4	0.53	0.13	0.14	-0.04	-0.44	-0.43	0.53	0.147	0.27	0.003	0.263	0.002	0.445	0.484	0.005	0.279	0.272	0.445	0.039	0.042	0.002	0.315	0.307	0.484	intronic	FTO	.
3	6859403	rs339807	A	G	0.9	0.84	0.91	0.91	0.39	0.66	0.85	0.44	0.52	0.52	0.18	0.26	0.25	-0.02	0.06	0.06	0.52	0.007	0.02	0.004	0.014	0.364	0.125	0.096	0.341	0.483	0.476	0.083	0.195	0.186	0.006	0.016	0.011	0.483	intergenic	GRM7-AS3;GRM7	.
15	25331756	rs7176331	T	G	0.73	0.67	0.71	0.76	0.23	0.8	0.58	0.44	0.48	0.53	-0.12	-0.09	-0.04	0.09	0.13	0.18	0.53	0.007	0.002	0.006	0.017	0.223	0.483	0.098	0.333	0.367	0.446	0.033	0.016	0.002	0.013	0.031	0.075	0.483	intergenic	SNORD109B(dist=53347),UBE3A(dist=5493)	.
3	7001912	rs2201924	A	T	0.48	0.59	0.4	0.48	0.07	0.52	0.52	0.52	0.33	0.41	0.07	-0.12	-0.04	0.07	-0.12	-0.04	0.52	0.023	0.059	0.011	0.014	0.384	0.388	0.005	0.483	0.242	0.324	0.002	0.023	0.002	0.003	0.023	0.002	0.483	intronic	GRM7	.
15	25353890	rs11855196	A	G	0.73	0.68	0.71	0.76	0.23	0.8	0.58	0.45	0.48	0.53	-0.12	-0.09	-0.04	0.1	0.13	0.18	0.53	0.006	0.004	0.007	0.014	0.223	0.483	0.098	0.342	0.363	0.444	0.029	0.018	0.002	0.016	0.029	0.074	0.483	intronic	UBE3A	.
1	167908409	rs203779	G	T	0.75	0.73	0.81	0.74	0.25	0.68	0.79	0.47	0.56	0.48	0.05	0.13	0.06	-0.06	0.02	-0.05	0.56	0.013	0.022	0.018	0.005	0.438	0.301	0.026	0.352	0.482	0.362	0.002	0.047	0.002	0.007	0.001	0.005	0.482	intronic	ADCY10	.
10	113139687	rs10787478	G	T	0.64	0.77	0.59	0.68	0.25	0.7	0.81	0.53	0.34	0.44	0.08	-0.11	-0.01	-0.04	-0.22	-0.13	0.53	0.024	0.06	0.01	0.016	0.482	0.337	0.029	0.433	0.222	0.311	0.009	0.016	0.004	0.003	0.094	0.039	0.482	intronic	TCF7L2	.
10	113138980	rs3814575	C	T	0.63	0.77	0.57	0.67	0.25	0.7	0.81	0.53	0.33	0.42	0.08	-0.13	-0.03	-0.04	-0.24	-0.15	0.53	0.028	0.072	0.01	0.023	0.482	0.337	0.029	0.433	0.203	0.292	0.009	0.024	0.002	0.003	0.109	0.049	0.482	intronic	TCF7L2	.
7	126708873	rs10280247	T	C	0.67	0.77	0.63	0.67	0.2	0.63	0.53	0.57	0.43	0.47	0.14	0	0.04	0.24	0.1	0.14	0.57	0.016	0.043	0.005	0.012	0.208	0.315	0.014	0.481	0.293	0.365	0.034	0.004	0.001	0.102	0.01	0.04	0.481	intronic	GRM8	.
15	25433421	rs11161176	C	T	0.73	0.67	0.72	0.75	0.22	0.78	0.59	0.46	0.5	0.53	-0.11	-0.06	-0.04	0.08	0.13	0.15	0.53	0.002	0.001	0	0.01	0.251	0.481	0.076	0.353	0.395	0.442	0.023	0.007	0.002	0.01	0.031	0.055	0.481	intronic	UBE3A	.
15	25432580	rs12595544	C	G	0.73	0.67	0.71	0.76	0.22	0.78	0.59	0.46	0.49	0.54	-0.11	-0.07	-0.02	0.09	0.12	0.17	0.54	0.006	0.003	0.006	0.016	0.246	0.481	0.08	0.353	0.38	0.459	0.023	0.011	0.004	0.011	0.027	0.069	0.481	intronic	UBE3A	.
17	33678732	rs3115689	G	T	0.58	0.61	0.56	0.62	0.09	0.62	0.57	0.53	0.47	0.53	-0.01	-0.06	0	0.04	-0.01	0.05	0.53	0.001	0.002	0.001	0.005	0.42	0.477	0	0.48	0.395	0.443	0.005	0.002	0.004	0.004	0.004	0	0.48	intronic	ASIC2	.
3	7391773	rs28660123	A	C	0.35	0.57	0.32	0.36	0.06	0.23	0.49	0.5	0.26	0.29	0.34	0.1	0.13	0.08	-0.17	-0.13	0.5	0.048	0.106	0.001	0.078	0.369	0.098	0.136	0.48	0.182	0.211	0.213	0.02	0.035	0.006	0.051	0.032	0.48	intronic	GRM7	.
7	126596794	rs6964806	A	G	0.46	0.67	0.44	0.43	0.13	0.32	0.48	0.54	0.31	0.3	0.36	0.12	0.12	0.2	-0.04	-0.04	0.54	0.048	0.101	0.003	0.095	0.246	0.094	0.045	0.48	0.191	0.197	0.215	0.023	0.026	0.067	0.001	0.002	0.48	intronic	GRM8	.
21	34916751	rs2834673	C	T	0.41	0.54	0.39	0.35	0.04	0.44	0.53	0.5	0.35	0.31	0.09	-0.05	-0.09	0.01	-0.14	-0.18	0.5	0.019	0.029	0.001	0.049	0.453	0.366	0.01	0.48	0.28	0.243	0.006	0.002	0.012	0.006	0.034	0.055	0.48	intronic	RUNX1	.
21	34922045	rs2834676	C	T	0.42	0.54	0.4	0.37	0.04	0.44	0.53	0.5	0.36	0.33	0.09	-0.04	-0.08	0	-0.13	-0.17	0.5	0.015	0.024	0.002	0.039	0.458	0.366	0.011	0.48	0.291	0.259	0.006	0	0.007	0.006	0.031	0.047	0.48	intronic	RUNX1	.
21	34922690	rs56185286	G	A	0.42	0.54	0.41	0.36	0.04	0.44	0.55	0.5	0.37	0.32	0.09	-0.03	-0.09	-0.01	-0.14	-0.19	0.5	0.016	0.019	0.001	0.044	0.474	0.366	0.017	0.48	0.301	0.252	0.006	0.002	0.009	0.004	0.033	0.062	0.48	intronic	RUNX1	.
17	33411862	rs16968314	G	A	0.29	0.73	0.24	0.26	0.2	0.17	0.73	0.54	0.04	0.06	0.56	0.07	0.09	0	-0.49	-0.47	0.56	0.225	0.39	0.002	0.358	0.443	0.003	0.479	0.439	0	0.006	0.477	0.007	0.017	0.006	0.397	0.366	0.479	intronic	ASIC2	.
17	33401716	rs9898140	G	A	0.29	0.73	0.24	0.26	0.27	0.17	0.73	0.45	-0.03	-0.01	0.56	0.07	0.09	-0.01	-0.49	-0.47	0.56	0.219	0.384	0.001	0.347	0.346	0.024	0.479	0.328	0	0.003	0.468	0.007	0.018	0.006	0.4	0.364	0.479	intronic	ASIC2	.
7	126556572	rs2299463	A	G	0.45	0.66	0.44	0.43	0.12	0.31	0.48	0.54	0.32	0.31	0.35	0.12	0.11	0.18	-0.04	-0.05	0.54	0.041	0.087	0.003	0.083	0.267	0.107	0.049	0.479	0.206	0.209	0.198	0.023	0.026	0.052	0	0.001	0.479	intronic	GRM8	.
7	126817961	rs3808148	A	G	0.45	0.67	0.45	0.42	0.12	0.32	0.47	0.55	0.33	0.3	0.35	0.13	0.09	0.21	-0.02	-0.05	0.55	0.043	0.084	0.003	0.091	0.25	0.11	0.037	0.479	0.21	0.2	0.194	0.023	0.02	0.063	0.003	0.001	0.479	intronic	GRM8	.
17	33419077	rs1827650	T	G	0.29	0.74	0.23	0.26	0.25	0.18	0.73	0.49	-0.02	0.01	0.57	0.06	0.09	0.01	-0.5	-0.47	0.57	0.23	0.406	0	0.355	0.369	0.013	0.472	0.369	0.002	0.003	0.478	0.004	0.018	0.006	0.404	0.356	0.478	intronic	ASIC2	.
17	33416833	rs1995524	A	G	0.29	0.74	0.23	0.26	0.21	0.18	0.73	0.53	0.02	0.05	0.57	0.06	0.09	0.01	-0.5	-0.47	0.57	0.23	0.406	0	0.355	0.424	0.001	0.472	0.427	0.003	0.004	0.478	0.004	0.018	0.006	0.404	0.356	0.478	intronic	ASIC2	.
17	33415140	rs8075637	C	G	0.29	0.74	0.24	0.26	0.21	0.18	0.73	0.53	0.03	0.05	0.57	0.07	0.08	0.01	-0.49	-0.47	0.57	0.229	0.396	0.002	0.364	0.424	0.001	0.472	0.427	0.003	0.003	0.478	0.006	0.015	0.006	0.395	0.364	0.478	intronic	ASIC2	.
17	33810983	rs9892446	G	A	0.55	0.7	0.58	0.48	0.15	0.26	0.71	0.54	0.43	0.32	0.44	0.33	0.22	-0.01	-0.13	-0.23	0.54	0.036	0.018	0.02	0.082	0.478	0.029	0.335	0.475	0.33	0.211	0.322	0.199	0.098	0.006	0.025	0.094	0.478	intronic	ASIC2	.
1	167907378	rs203777	T	C	0.76	0.73	0.81	0.75	0.26	0.69	0.79	0.48	0.55	0.49	0.05	0.12	0.06	-0.05	0.02	-0.04	0.55	0.01	0.019	0.015	0.005	0.432	0.307	0.02	0.354	0.477	0.367	0.002	0.041	0.002	0.004	0.001	0.003	0.477	intronic	ADCY10	.
16	53861586	rs11076003	C	G	0.37	0.7	0.31	0.33	0.56	0.19	0.75	0.15	-0.24	-0.23	0.52	0.12	0.14	-0.04	-0.44	-0.42	0.52	0.14	0.262	0.003	0.246	0.074	0.249	0.477	0.04	0.112	0.1	0.429	0.035	0.043	0.001	0.315	0.299	0.477	intronic	FTO	.
17	34021948	rs6505390	C	T	0.51	0.34	0.53	0.45	0.01	0.46	0.39	0.33	0.53	0.44	-0.12	0.07	-0.02	-0.05	0.15	0.06	0.53	0.021	0.054	0.008	0.016	0.37	0.453	0.006	0.376	0.476	0.392	0.019	0.003	0.004	0.004	0.034	0.005	0.476	intronic	ASIC2	.
21	34932812	rs2834677	T	C	0.92	0.92	0.91	0.92	0.42	0.94	0.93	0.5	0.5	0.5	-0.03	-0.03	-0.03	-0.02	-0.02	-0.01	0.5	0.004	0.004	0.003	0.005	0.458	0.476	0.003	0.419	0.453	0.466	0.002	0.003	0.001	0.005	0.002	0.003	0.476	intronic	RUNX1	.
21	34932731	rs28610975	A	G	0.92	0.92	0.91	0.92	0.42	0.94	0.93	0.5	0.5	0.5	-0.03	-0.03	-0.03	-0.02	-0.02	-0.01	0.5	0.004	0.004	0.003	0.005	0.458	0.476	0.003	0.419	0.453	0.466	0.002	0.003	0.001	0.005	0.002	0.003	0.476	intronic	RUNX1	.
9	6654319	rs73407144	A	T	0.42	0.7	0.42	0.36	0.55	0.16	0.69	0.16	-0.12	-0.18	0.54	0.26	0.2	0.02	-0.27	-0.33	0.54	0.096	0.143	0.006	0.21	0.038	0.273	0.44	0.05	0.024	0.062	0.475	0.147	0.091	0.005	0.125	0.189	0.475	intergenic	GLDC;KDM4C	.
15	25428156	rs11161175	C	T	0.73	0.67	0.71	0.75	0.22	0.78	0.58	0.45	0.49	0.53	-0.11	-0.07	-0.03	0.09	0.13	0.17	0.53	0.006	0.003	0.005	0.014	0.235	0.475	0.084	0.346	0.374	0.449	0.023	0.011	0.003	0.013	0.029	0.07	0.475	intronic	UBE3A	.
15	25416308	rs35253090	T	A	0.73	0.67	0.71	0.75	0.22	0.78	0.58	0.44	0.49	0.53	-0.12	-0.07	-0.03	0.08	0.13	0.17	0.53	0.005	0.002	0.004	0.015	0.235	0.475	0.084	0.338	0.374	0.442	0.027	0.011	0.003	0.01	0.029	0.065	0.475	intronic	UBE3A	.
12	11186414	rs35969491	T	A	0.66	0.7	0.69	0.62	0.21	0.61	0.77	0.5	0.48	0.41	0.09	0.08	0	-0.06	-0.07	-0.15	0.5	0.008	0.005	0.012	0.012	0.474	0.285	0.051	0.408	0.392	0.292	0.016	0.016	0.004	0.003	0.006	0.043	0.474	exonic	TAS2R42	nonsynonymous
12	11194291	rs34949195	A	G	0.66	0.7	0.69	0.62	0.21	0.62	0.77	0.5	0.48	0.41	0.09	0.07	0	-0.06	-0.08	-0.15	0.5	0.008	0.005	0.011	0.012	0.474	0.291	0.048	0.408	0.39	0.292	0.014	0.013	0.004	0.003	0.006	0.043	0.474	intergenic	TAS2R42;PRB3	.
12	11189667	rs35499317	T	C	0.66	0.7	0.69	0.62	0.21	0.62	0.77	0.5	0.48	0.41	0.09	0.07	0	-0.06	-0.08	-0.15	0.5	0.007	0.005	0.009	0.012	0.474	0.291	0.048	0.408	0.384	0.292	0.014	0.011	0.004	0.003	0.008	0.043	0.474	intergenic	TAS2R42;PRB3	.
12	11195814	rs67955183	C	T	0.66	0.7	0.69	0.61	0.21	0.62	0.77	0.5	0.48	0.4	0.09	0.07	0	-0.06	-0.08	-0.15	0.5	0.009	0.005	0.012	0.013	0.474	0.291	0.048	0.408	0.388	0.288	0.014	0.012	0.004	0.003	0.007	0.045	0.474	intergenic	TAS2R42;PRB3	.
12	11191389	rs7132674	A	G	0.66	0.71	0.69	0.61	0.21	0.62	0.77	0.5	0.48	0.4	0.09	0.07	-0.01	-0.06	-0.08	-0.16	0.5	0.01	0.005	0.013	0.015	0.474	0.291	0.048	0.412	0.39	0.287	0.015	0.013	0.004	0.002	0.006	0.046	0.474	intergenic	TAS2R42;PRB3	.
12	11191980	rs7136602	T	A	0.66	0.7	0.69	0.61	0.21	0.62	0.77	0.5	0.48	0.4	0.09	0.07	0	-0.06	-0.08	-0.15	0.5	0.009	0.005	0.012	0.013	0.474	0.291	0.048	0.408	0.388	0.288	0.014	0.012	0.004	0.003	0.007	0.045	0.474	intergenic	TAS2R42;PRB3	.
12	11191715	rs7302711	C	T	0.66	0.7	0.69	0.61	0.21	0.62	0.77	0.5	0.48	0.4	0.09	0.07	-0.01	-0.06	-0.08	-0.16	0.5	0.01	0.005	0.013	0.015	0.474	0.291	0.048	0.408	0.39	0.285	0.014	0.013	0.004	0.003	0.006	0.047	0.474	intergenic	TAS2R42;PRB3	.
17	34105947	rs9910415	C	G	0.91	0.96	0.9	0.93	0.43	0.9	0.9	0.53	0.47	0.5	0.06	0	0.03	0.06	-0.01	0.02	0.53	0.005	0.015	0.002	0.002	0.396	0.388	0.005	0.456	0.419	0.473	0.019	0.004	0.003	0.016	0.004	0.001	0.473	intronic	ASIC2	.
5	1404589	rs11564767	T	A	0.91	1	0.88	0.93	0.48	0.94	0.97	0.52	0.41	0.45	0.06	-0.06	-0.01	0.03	-0.08	-0.04	0.52	0.043	0.096	0.017	0.047	0.452	0.402	0.003	0.473	0.308	0.422	0.046	0.022	0.003	0.023	0.051	0.008	0.473	intronic	SLC6A3	.
17	33406032	rs35494118	A	G	0.29	0.7	0.25	0.26	0.26	0.18	0.73	0.44	-0.02	0	0.53	0.07	0.08	-0.03	-0.48	-0.47	0.53	0.199	0.347	0.003	0.325	0.358	0.017	0.472	0.315	0.003	0.004	0.436	0.007	0.015	0.003	0.388	0.366	0.472	intronic	ASIC2	.
17	33419657	rs9902936	A	G	0.29	0.73	0.24	0.26	0.25	0.18	0.73	0.47	-0.02	0.01	0.55	0.06	0.09	-0.01	-0.5	-0.47	0.55	0.218	0.387	0	0.341	0.369	0.013	0.472	0.352	0.003	0.003	0.461	0.004	0.017	0.006	0.402	0.358	0.472	intronic	ASIC2	.
7	126561369	rs11982636	G	A	0.45	0.67	0.44	0.43	0.13	0.32	0.48	0.54	0.31	0.3	0.36	0.12	0.11	0.2	-0.04	-0.05	0.54	0.047	0.098	0.003	0.095	0.246	0.094	0.045	0.472	0.188	0.19	0.207	0.021	0.023	0.062	0	0.001	0.472	intronic	GRM8	.
7	126593365	rs12533463	C	T	0.46	0.67	0.44	0.43	0.13	0.32	0.48	0.54	0.31	0.3	0.36	0.12	0.12	0.2	-0.04	-0.04	0.54	0.045	0.096	0.003	0.089	0.246	0.094	0.045	0.472	0.191	0.197	0.207	0.023	0.026	0.062	0.001	0.002	0.472	intronic	GRM8	.
7	126593711	rs12533543	C	T	0.45	0.67	0.44	0.43	0.13	0.32	0.48	0.54	0.31	0.3	0.36	0.12	0.12	0.2	-0.04	-0.04	0.54	0.045	0.096	0.003	0.091	0.246	0.094	0.045	0.472	0.191	0.194	0.207	0.023	0.025	0.062	0.001	0.001	0.472	intronic	GRM8	.
7	126581807	rs12536122	G	A	0.45	0.67	0.44	0.43	0.13	0.33	0.48	0.54	0.31	0.3	0.34	0.11	0.1	0.19	-0.04	-0.05	0.54	0.045	0.096	0.003	0.091	0.246	0.103	0.039	0.472	0.191	0.194	0.196	0.018	0.02	0.062	0.001	0.001	0.472	intronic	GRM8	.
7	126593561	rs12538680	A	G	0.45	0.67	0.44	0.42	0.13	0.32	0.48	0.54	0.31	0.29	0.36	0.12	0.11	0.2	-0.04	-0.05	0.54	0.047	0.096	0.003	0.096	0.246	0.094	0.045	0.472	0.191	0.188	0.207	0.023	0.022	0.062	0.001	0	0.472	intronic	GRM8	.
7	126578175	rs1361990	T	C	0.45	0.67	0.44	0.43	0.13	0.32	0.48	0.54	0.31	0.3	0.36	0.12	0.12	0.2	-0.04	-0.04	0.54	0.046	0.099	0.003	0.089	0.246	0.094	0.045	0.472	0.187	0.197	0.207	0.021	0.026	0.062	0	0.002	0.472	intronic	GRM8	.
7	126568402	rs1419495	G	C	0.45	0.67	0.44	0.43	0.13	0.32	0.48	0.54	0.31	0.3	0.36	0.12	0.11	0.2	-0.04	-0.05	0.54	0.046	0.099	0.003	0.091	0.246	0.094	0.045	0.472	0.187	0.194	0.207	0.021	0.025	0.062	0	0.001	0.472	intronic	GRM8	.
7	126578916	rs1419497	C	T	0.45	0.67	0.44	0.43	0.13	0.32	0.48	0.54	0.31	0.3	0.36	0.12	0.11	0.2	-0.04	-0.04	0.54	0.046	0.099	0.003	0.091	0.246	0.094	0.045	0.472	0.187	0.194	0.207	0.021	0.025	0.062	0	0.001	0.472	intronic	GRM8	.
7	126578986	rs1419498	T	A	0.46	0.67	0.44	0.43	0.13	0.32	0.48	0.54	0.31	0.3	0.36	0.12	0.12	0.2	-0.04	-0.04	0.54	0.046	0.099	0.003	0.089	0.246	0.094	0.045	0.472	0.187	0.197	0.207	0.021	0.026	0.062	0	0.002	0.472	intronic	GRM8	.
7	126607110	rs17683777	C	T	0.46	0.67	0.44	0.44	0.13	0.32	0.48	0.54	0.31	0.31	0.35	0.12	0.11	0.2	-0.04	-0.04	0.54	0.045	0.096	0.003	0.089	0.246	0.099	0.042	0.472	0.191	0.197	0.202	0.02	0.024	0.062	0.001	0.002	0.472	intronic	GRM8	.
7	126583226	rs1819776	C	G	0.46	0.67	0.44	0.43	0.13	0.32	0.48	0.54	0.31	0.3	0.36	0.12	0.11	0.2	-0.04	-0.04	0.54	0.045	0.096	0.003	0.089	0.246	0.094	0.045	0.472	0.191	0.197	0.207	0.023	0.026	0.062	0.001	0.002	0.472	intronic	GRM8	.
7	126582822	rs1894733	T	G	0.46	0.67	0.44	0.43	0.13	0.32	0.48	0.54	0.31	0.3	0.36	0.12	0.11	0.2	-0.04	-0.05	0.54	0.046	0.099	0.003	0.092	0.246	0.094	0.045	0.472	0.187	0.194	0.207	0.021	0.025	0.062	0	0.001	0.472	intronic	GRM8	.
7	126570453	rs2237743	A	G	0.45	0.67	0.44	0.43	0.13	0.32	0.48	0.54	0.31	0.3	0.36	0.12	0.12	0.2	-0.04	-0.04	0.54	0.045	0.096	0.003	0.091	0.246	0.094	0.045	0.472	0.191	0.194	0.207	0.023	0.025	0.062	0.001	0.001	0.472	intronic	GRM8	.
7	126608073	rs2237747	G	T	0.46	0.67	0.44	0.44	0.13	0.32	0.48	0.54	0.31	0.31	0.35	0.12	0.12	0.2	-0.04	-0.04	0.54	0.043	0.096	0.003	0.081	0.246	0.099	0.042	0.472	0.191	0.206	0.202	0.02	0.028	0.062	0.001	0.003	0.472	intronic	GRM8	.
7	126578691	rs2299468	T	C	0.46	0.67	0.44	0.43	0.13	0.32	0.48	0.54	0.31	0.3	0.36	0.12	0.11	0.2	-0.04	-0.05	0.54	0.045	0.096	0.003	0.092	0.246	0.094	0.045	0.472	0.191	0.194	0.207	0.023	0.025	0.062	0.001	0.001	0.472	intronic	GRM8	.
7	126578834	rs2299469	C	T	0.45	0.67	0.44	0.43	0.13	0.32	0.48	0.54	0.31	0.3	0.36	0.12	0.11	0.2	-0.04	-0.05	0.54	0.047	0.099	0.003	0.094	0.246	0.094	0.045	0.472	0.187	0.191	0.207	0.021	0.023	0.062	0	0.001	0.472	intronic	GRM8	.
7	126580415	rs2299472	C	A	0.46	0.67	0.44	0.44	0.13	0.32	0.48	0.54	0.31	0.31	0.36	0.12	0.12	0.2	-0.04	-0.04	0.54	0.044	0.096	0.003	0.086	0.246	0.094	0.045	0.472	0.191	0.2	0.207	0.023	0.028	0.062	0.001	0.002	0.472	intronic	GRM8	.
7	126604144	rs2299475	T	C	0.45	0.67	0.44	0.42	0.13	0.32	0.48	0.54	0.31	0.29	0.36	0.12	0.11	0.2	-0.04	-0.05	0.54	0.047	0.096	0.003	0.097	0.246	0.094	0.045	0.472	0.191	0.187	0.207	0.023	0.022	0.062	0.001	0	0.472	intronic	GRM8	.
7	126604276	rs2299476	A	G	0.45	0.67	0.44	0.43	0.13	0.32	0.48	0.54	0.31	0.3	0.36	0.12	0.11	0.2	-0.04	-0.05	0.54	0.047	0.099	0.003	0.094	0.246	0.094	0.045	0.472	0.187	0.19	0.207	0.021	0.023	0.062	0	0.001	0.472	intronic	GRM8	.
7	126587191	rs2402818	G	C	0.45	0.67	0.44	0.43	0.13	0.32	0.48	0.54	0.31	0.3	0.36	0.12	0.12	0.2	-0.04	-0.04	0.54	0.045	0.096	0.003	0.089	0.246	0.094	0.045	0.472	0.191	0.197	0.207	0.023	0.026	0.062	0.001	0.002	0.472	intronic	GRM8	.
7	126574083	rs4141361	A	T	0.46	0.67	0.44	0.44	0.13	0.32	0.48	0.54	0.31	0.31	0.36	0.12	0.12	0.2	-0.04	-0.04	0.54	0.044	0.096	0.003	0.088	0.246	0.094	0.045	0.472	0.191	0.197	0.207	0.023	0.027	0.062	0.001	0.002	0.472	intronic	GRM8	.
7	126586468	rs4276622	G	C	0.45	0.67	0.43	0.43	0.13	0.31	0.48	0.54	0.3	0.3	0.36	0.12	0.12	0.2	-0.04	-0.05	0.54	0.047	0.101	0.003	0.091	0.246	0.09	0.049	0.472	0.184	0.194	0.213	0.022	0.028	0.062	0.001	0.001	0.472	intronic	GRM8	.
7	126586485	rs4580985	C	T	0.45	0.67	0.43	0.43	0.13	0.31	0.48	0.54	0.3	0.3	0.36	0.12	0.12	0.2	-0.04	-0.05	0.54	0.047	0.101	0.003	0.091	0.246	0.09	0.049	0.472	0.184	0.194	0.213	0.022	0.028	0.062	0.001	0.001	0.472	intronic	GRM8	.
7	126586620	rs4580986	A	C	0.45	0.67	0.44	0.42	0.13	0.32	0.48	0.54	0.31	0.29	0.36	0.12	0.1	0.2	-0.04	-0.06	0.54	0.048	0.096	0.003	0.102	0.246	0.094	0.045	0.472	0.191	0.182	0.207	0.023	0.019	0.062	0.001	0.001	0.472	intronic	GRM8	.
7	126593124	rs57121551	G	T	0.46	0.67	0.44	0.43	0.13	0.32	0.48	0.54	0.31	0.3	0.36	0.13	0.12	0.2	-0.03	-0.04	0.54	0.044	0.093	0.003	0.089	0.246	0.094	0.045	0.472	0.194	0.197	0.207	0.024	0.026	0.062	0.001	0.002	0.472	intronic	GRM8	.
7	126593190	rs61033866	C	A	0.46	0.67	0.44	0.43	0.13	0.32	0.48	0.54	0.31	0.3	0.36	0.12	0.11	0.2	-0.04	-0.05	0.54	0.045	0.096	0.003	0.091	0.246	0.094	0.045	0.472	0.191	0.194	0.207	0.023	0.025	0.062	0.001	0.001	0.472	intronic	GRM8	.
7	126589977	rs62477871	A	G	0.46	0.67	0.44	0.43	0.13	0.32	0.48	0.54	0.31	0.3	0.36	0.12	0.11	0.2	-0.04	-0.05	0.54	0.047	0.099	0.003	0.094	0.246	0.094	0.045	0.472	0.188	0.191	0.207	0.021	0.023	0.062	0	0.001	0.472	intronic	GRM8	.
7	126590040	rs62477872	G	A	0.45	0.67	0.43	0.43	0.13	0.32	0.48	0.54	0.3	0.3	0.36	0.11	0.11	0.2	-0.04	-0.05	0.54	0.047	0.101	0.003	0.092	0.246	0.094	0.045	0.472	0.184	0.193	0.207	0.02	0.024	0.062	0.001	0.001	0.472	intronic	GRM8	.
7	126594967	rs62477879	T	C	0.45	0.67	0.44	0.43	0.13	0.32	0.48	0.54	0.31	0.3	0.36	0.12	0.11	0.2	-0.04	-0.05	0.54	0.048	0.099	0.003	0.097	0.246	0.094	0.045	0.472	0.187	0.188	0.207	0.021	0.022	0.062	0	0	0.472	intronic	GRM8	.
7	126596268	rs62477881	G	A	0.45	0.67	0.44	0.43	0.13	0.32	0.48	0.54	0.31	0.3	0.36	0.12	0.12	0.2	-0.04	-0.04	0.54	0.045	0.099	0.003	0.089	0.246	0.094	0.045	0.472	0.188	0.197	0.207	0.021	0.026	0.062	0	0.002	0.472	intronic	GRM8	.
7	126595862	rs68171167	T	A	0.45	0.67	0.44	0.42	0.13	0.32	0.48	0.54	0.31	0.29	0.36	0.12	0.1	0.2	-0.04	-0.06	0.54	0.048	0.096	0.003	0.102	0.246	0.094	0.045	0.472	0.191	0.182	0.207	0.023	0.019	0.062	0.001	0.001	0.472	intronic	GRM8	.
7	126567425	rs75636654	G	T	0.47	0.67	0.45	0.44	0.13	0.32	0.48	0.54	0.32	0.31	0.36	0.14	0.12	0.2	-0.02	-0.03	0.54	0.04	0.085	0.004	0.082	0.246	0.094	0.045	0.472	0.204	0.206	0.207	0.029	0.031	0.062	0.003	0.003	0.472	intronic	GRM8	.
7	126563027	rs8180791	G	A	0.46	0.67	0.44	0.43	0.13	0.32	0.48	0.54	0.31	0.3	0.36	0.12	0.11	0.2	-0.04	-0.05	0.54	0.046	0.096	0.003	0.094	0.246	0.094	0.045	0.472	0.191	0.191	0.207	0.023	0.023	0.062	0.001	0.001	0.472	intronic	GRM8	.
7	126575589	rs9641799	G	T	0.46	0.67	0.44	0.44	0.13	0.32	0.48	0.54	0.31	0.31	0.36	0.12	0.12	0.2	-0.04	-0.04	0.54	0.045	0.096	0.003	0.089	0.246	0.094	0.045	0.472	0.191	0.197	0.207	0.023	0.026	0.062	0.001	0.002	0.472	intronic	GRM8	.
7	126586091	rs9691501	A	G	0.46	0.67	0.44	0.43	0.13	0.32	0.48	0.54	0.31	0.3	0.36	0.12	0.12	0.2	-0.04	-0.04	0.54	0.045	0.096	0.003	0.089	0.246	0.094	0.045	0.472	0.191	0.197	0.207	0.023	0.026	0.062	0.001	0.002	0.472	intronic	GRM8	.
7	126565661	rs9942596	A	G	0.46	0.67	0.44	0.43	0.13	0.32	0.48	0.54	0.31	0.3	0.36	0.12	0.12	0.2	-0.04	-0.04	0.54	0.045	0.096	0.003	0.089	0.246	0.094	0.045	0.472	0.191	0.197	0.207	0.023	0.026	0.062	0.001	0.002	0.472	intronic	GRM8	.
18	60366702	rs9966412	T	C	0.89	0.9	0.89	0.9	0.4	0.89	0.93	0.5	0.49	0.5	0.01	-0.01	0.01	-0.03	-0.04	-0.03	0.5	0	0.001	0.002	0.005	0.471	0.416	0.002	0.41	0.396	0.455	0.005	0.001	0.004	0.001	0.013	0	0.471	intergenic	PMAIP1;MC4R	.
17	33360205	rs12450971	C	T	0.43	0.58	0.4	0.4	0.06	0.15	0.48	0.51	0.34	0.34	0.42	0.25	0.25	0.1	-0.07	-0.07	0.51	0.022	0.048	0.003	0.048	0.353	0.034	0.213	0.471	0.246	0.241	0.312	0.127	0.125	0.008	0.01	0.01	0.471	intronic	ASIC2	.
17	33362572	rs1394386	G	A	0.43	0.58	0.4	0.4	0.06	0.15	0.48	0.51	0.34	0.34	0.42	0.25	0.25	0.1	-0.07	-0.08	0.51	0.023	0.049	0.003	0.05	0.353	0.034	0.213	0.471	0.243	0.238	0.312	0.125	0.123	0.008	0.011	0.011	0.471	intronic	ASIC2	.
17	33357782	rs59327933	T	C	0.43	0.58	0.41	0.41	0.06	0.15	0.48	0.51	0.34	0.34	0.42	0.25	0.26	0.1	-0.08	-0.07	0.51	0.021	0.047	0.003	0.045	0.359	0.034	0.218	0.471	0.246	0.247	0.312	0.128	0.13	0.007	0.011	0.01	0.471	intronic	ASIC2	.
17	33357788	rs60620763	A	T	0.43	0.58	0.41	0.41	0.06	0.15	0.48	0.51	0.34	0.35	0.42	0.25	0.26	0.1	-0.08	-0.07	0.51	0.021	0.047	0.003	0.043	0.359	0.034	0.218	0.471	0.246	0.25	0.312	0.128	0.133	0.007	0.011	0.009	0.471	intronic	ASIC2	.
17	33354937	rs66717518	G	A	0.43	0.58	0.41	0.4	0.06	0.15	0.48	0.51	0.34	0.33	0.42	0.25	0.25	0.1	-0.08	-0.08	0.51	0.023	0.047	0.003	0.05	0.359	0.034	0.218	0.471	0.246	0.238	0.312	0.128	0.123	0.007	0.011	0.013	0.471	intronic	ASIC2	.
7	127250652	rs10270765	A	G	0.85	0.93	0.84	0.81	0.39	0.74	0.92	0.54	0.45	0.42	0.19	0.1	0.07	0.01	-0.08	-0.11	0.54	0.023	0.037	0.001	0.059	0.466	0.215	0.103	0.471	0.358	0.312	0.12	0.026	0.009	0.004	0.024	0.044	0.471	intronic	GRM8	.
7	127250426	rs6948480	G	C	0.85	0.93	0.84	0.81	0.39	0.74	0.92	0.54	0.45	0.42	0.19	0.1	0.07	0.01	-0.08	-0.11	0.54	0.022	0.037	0	0.058	0.466	0.215	0.103	0.471	0.358	0.314	0.12	0.026	0.01	0.004	0.024	0.043	0.471	intronic	GRM8	.
17	33050230	rs16582	C	T	0.48	0.73	0.46	0.49	0.17	0.38	0.67	0.57	0.29	0.33	0.35	0.07	0.11	0.07	-0.21	-0.17	0.57	0.051	0.121	0.001	0.084	0.406	0.108	0.143	0.47	0.165	0.207	0.188	0.005	0.021	0.001	0.083	0.052	0.47	intronic	ASIC2	.
17	33051198	rs16967972	A	G	0.49	0.73	0.46	0.5	0.17	0.38	0.67	0.57	0.3	0.33	0.35	0.08	0.12	0.07	-0.2	-0.17	0.57	0.049	0.118	0.001	0.079	0.406	0.108	0.143	0.47	0.168	0.213	0.188	0.006	0.024	0.001	0.081	0.048	0.47	intronic	ASIC2	.
17	33068149	rs223037	G	C	0.48	0.73	0.47	0.5	0.17	0.38	0.67	0.57	0.3	0.33	0.35	0.08	0.11	0.07	-0.2	-0.17	0.57	0.049	0.115	0	0.082	0.406	0.108	0.143	0.47	0.171	0.211	0.188	0.007	0.023	0.001	0.078	0.05	0.47	intronic	ASIC2	.
7	45731059	rs2139894	G	T	0.65	0.49	0.69	0.63	0.13	0.47	0.4	0.37	0.56	0.51	0.02	0.21	0.16	0.09	0.29	0.24	0.56	0.034	0.081	0.001	0.053	0.174	0.254	0.007	0.263	0.47	0.426	0.007	0.079	0.053	0.005	0.145	0.111	0.47	ncRNA_intronic	SEPT7P2	.
17	34134981	rs11080252	C	T	0.7	0.48	0.75	0.72	0.18	0.66	0.52	0.31	0.58	0.55	-0.17	0.1	0.07	-0.03	0.23	0.2	0.58	0.044	0.095	0.003	0.08	0.228	0.383	0.034	0.23	0.469	0.445	0.035	0.009	0.004	0.006	0.091	0.076	0.469	intronic	ASIC2	.
17	34097653	rs8065217	T	C	0.91	0.96	0.89	0.93	0.43	0.9	0.9	0.53	0.46	0.5	0.06	-0.01	0.02	0.06	-0.01	0.02	0.53	0.006	0.017	0.002	0.002	0.396	0.396	0.005	0.456	0.413	0.469	0.015	0.004	0	0.016	0.004	0.001	0.469	intronic	ASIC2	.
7	126765107	rs10263498	T	C	0.62	0.91	0.63	0.57	0.41	0.49	0.93	0.5	0.22	0.16	0.42	0.14	0.08	-0.02	-0.31	-0.37	0.5	0.091	0.146	0.007	0.206	0.468	0.009	0.384	0.389	0.098	0.047	0.302	0.04	0.009	0.003	0.209	0.272	0.468	intronic	GRM8	.
7	126763107	rs13242870	C	A	0.62	0.91	0.63	0.56	0.41	0.49	0.93	0.5	0.22	0.16	0.42	0.14	0.07	-0.02	-0.3	-0.37	0.5	0.092	0.144	0.008	0.209	0.468	0.009	0.384	0.389	0.1	0.045	0.302	0.042	0.008	0.003	0.206	0.275	0.468	intronic	GRM8	.
1	18830441	rs6685199	G	A	0.37	0.7	0.32	0.37	0.15	0.29	0.44	0.55	0.17	0.22	0.41	0.03	0.08	0.26	-0.12	-0.07	0.55	0.115	0.238	0.001	0.186	0.179	0.052	0.042	0.467	0.067	0.101	0.269	0.002	0.007	0.112	0.028	0.009	0.467	intergenic	PAX7(dist=81575),TAS1R2(dist=9158)	.
6	88131839	rs2057403	G	C	0.26	0.58	0.28	0.16	0.07	0.14	0.53	0.5	0.2	0.08	0.44	0.14	0.02	0.05	-0.25	-0.37	0.5	0.163	0.158	0.044	0.342	0.395	0.016	0.291	0.467	0.125	0.025	0.351	0.054	0.003	0.003	0.118	0.283	0.467	intergenic	SPACA1;CNR1	.
6	88133658	rs9353525	G	A	0.26	0.58	0.28	0.17	0.07	0.14	0.53	0.5	0.2	0.09	0.44	0.14	0.03	0.05	-0.25	-0.36	0.5	0.155	0.156	0.039	0.327	0.395	0.016	0.291	0.467	0.127	0.03	0.351	0.056	0.002	0.003	0.117	0.27	0.467	intergenic	SPACA1;CNR1	.
3	7243998	rs2007029	G	A	0.86	0.96	0.89	0.89	0.45	0.82	0.96	0.51	0.44	0.44	0.14	0.07	0.07	0	-0.07	-0.07	0.51	0.007	0.018	0.003	0.022	0.467	0.252	0.091	0.431	0.38	0.372	0.077	0.02	0.015	0.007	0.024	0.028	0.467	intronic	GRM7	.
1	167911280	rs203781	C	A	0.75	0.73	0.81	0.74	0.27	0.68	0.79	0.47	0.54	0.47	0.06	0.13	0.06	-0.05	0.02	-0.05	0.54	0.012	0.019	0.018	0.005	0.421	0.284	0.026	0.342	0.465	0.346	0	0.047	0.002	0.004	0.001	0.005	0.465	intronic	ADCY10	.
3	6882629	rs1154354	A	T	0.79	0.8	0.81	0.78	0.28	0.75	0.67	0.52	0.54	0.5	0.05	0.07	0.03	0.13	0.14	0.11	0.54	0.001	0.001	0.002	0.005	0.264	0.358	0.01	0.408	0.464	0.407	0	0.013	0.001	0.029	0.058	0.028	0.464	intronic	GRM7	.
7	126579462	rs10487454	T	C	0.46	0.67	0.44	0.43	0.13	0.32	0.48	0.54	0.31	0.3	0.35	0.12	0.11	0.19	-0.04	-0.05	0.54	0.043	0.09	0.003	0.088	0.246	0.094	0.045	0.464	0.191	0.191	0.2	0.023	0.023	0.057	0.001	0.001	0.464	intronic	GRM8	.
7	126571417	rs10954120	C	T	0.46	0.67	0.44	0.44	0.13	0.32	0.48	0.54	0.31	0.31	0.35	0.12	0.12	0.19	-0.04	-0.04	0.54	0.041	0.09	0.003	0.081	0.246	0.094	0.045	0.464	0.191	0.2	0.2	0.023	0.028	0.057	0.001	0.002	0.464	intronic	GRM8	.
7	126553393	rs11486997	A	G	0.46	0.67	0.43	0.44	0.13	0.31	0.48	0.54	0.3	0.3	0.36	0.12	0.12	0.2	-0.04	-0.04	0.54	0.047	0.102	0.003	0.089	0.239	0.085	0.049	0.464	0.178	0.191	0.213	0.022	0.029	0.062	0.001	0.002	0.464	intronic	GRM8	.
7	126600493	rs1345209	G	A	0.45	0.67	0.44	0.43	0.13	0.32	0.48	0.54	0.31	0.3	0.35	0.12	0.12	0.19	-0.04	-0.04	0.54	0.042	0.09	0.003	0.083	0.246	0.094	0.045	0.464	0.191	0.197	0.2	0.023	0.026	0.057	0.001	0.002	0.464	intronic	GRM8	.
7	126577249	rs17610345	C	G	0.46	0.67	0.44	0.43	0.13	0.32	0.48	0.54	0.31	0.3	0.36	0.12	0.12	0.2	-0.04	-0.04	0.54	0.045	0.096	0.003	0.091	0.239	0.089	0.045	0.464	0.185	0.188	0.207	0.023	0.025	0.062	0.001	0.001	0.464	intronic	GRM8	.
7	126561897	rs1946110	G	A	0.45	0.67	0.42	0.43	0.13	0.32	0.48	0.54	0.29	0.3	0.35	0.11	0.11	0.19	-0.05	-0.05	0.54	0.046	0.102	0.003	0.086	0.246	0.094	0.045	0.464	0.177	0.193	0.2	0.016	0.024	0.057	0.002	0.001	0.464	intronic	GRM8	.
7	126589336	rs2106311	G	A	0.45	0.67	0.44	0.43	0.13	0.32	0.48	0.54	0.31	0.3	0.35	0.12	0.12	0.19	-0.04	-0.04	0.54	0.042	0.09	0.003	0.086	0.246	0.094	0.045	0.464	0.191	0.194	0.2	0.023	0.025	0.057	0.001	0.001	0.464	intronic	GRM8	.
7	126589403	rs2106312	T	G	0.46	0.67	0.44	0.44	0.13	0.32	0.48	0.54	0.31	0.31	0.35	0.12	0.12	0.19	-0.04	-0.04	0.54	0.042	0.09	0.003	0.083	0.246	0.094	0.045	0.464	0.191	0.197	0.2	0.023	0.026	0.057	0.001	0.002	0.464	intronic	GRM8	.
7	126569423	rs2299466	A	C	0.45	0.67	0.44	0.43	0.13	0.32	0.48	0.54	0.31	0.3	0.35	0.12	0.11	0.19	-0.04	-0.05	0.54	0.045	0.093	0.003	0.091	0.246	0.094	0.045	0.464	0.187	0.188	0.2	0.021	0.022	0.057	0	0	0.464	intronic	GRM8	.
7	126569592	rs2299467	A	T	0.46	0.67	0.44	0.44	0.13	0.32	0.48	0.54	0.31	0.31	0.35	0.12	0.12	0.19	-0.04	-0.04	0.54	0.042	0.093	0.003	0.08	0.246	0.094	0.045	0.464	0.187	0.2	0.2	0.021	0.028	0.057	0	0.002	0.464	intronic	GRM8	.
7	126642626	rs28428538	C	T	0.45	0.67	0.44	0.43	0.13	0.32	0.46	0.54	0.31	0.3	0.34	0.12	0.1	0.21	-0.02	-0.03	0.54	0.044	0.09	0.003	0.091	0.231	0.099	0.034	0.464	0.191	0.188	0.194	0.02	0.02	0.067	0.003	0.003	0.464	intronic	GRM8	.
7	126563289	rs59689022	T	C	0.44	0.67	0.41	0.42	0.13	0.31	0.47	0.54	0.28	0.29	0.35	0.1	0.11	0.2	-0.06	-0.05	0.54	0.051	0.113	0.002	0.094	0.241	0.09	0.046	0.464	0.165	0.185	0.206	0.014	0.023	0.06	0.005	0	0.464	intronic	GRM8	.
7	126605107	rs60156642	T	A	0.45	0.67	0.44	0.42	0.13	0.32	0.48	0.54	0.31	0.29	0.35	0.12	0.11	0.19	-0.04	-0.05	0.54	0.044	0.09	0.003	0.091	0.246	0.094	0.045	0.464	0.191	0.188	0.2	0.023	0.022	0.057	0.001	0	0.464	intronic	GRM8	.
7	126581756	rs61068613	T	C	0.45	0.67	0.44	0.43	0.13	0.32	0.48	0.54	0.31	0.3	0.34	0.12	0.11	0.19	-0.04	-0.05	0.54	0.042	0.09	0.003	0.086	0.246	0.099	0.042	0.464	0.191	0.194	0.194	0.02	0.022	0.057	0.001	0.001	0.464	intronic	GRM8	.
7	126592686	rs62477875	G	A	0.45	0.67	0.44	0.43	0.13	0.32	0.5	0.54	0.31	0.3	0.35	0.12	0.11	0.17	-0.06	-0.07	0.54	0.045	0.093	0.003	0.091	0.267	0.094	0.058	0.464	0.187	0.188	0.2	0.021	0.022	0.044	0.005	0.004	0.464	intronic	GRM8	.
7	126564102	rs8180772	T	G	0.46	0.67	0.44	0.43	0.13	0.32	0.48	0.54	0.31	0.3	0.35	0.12	0.11	0.19	-0.04	-0.05	0.54	0.042	0.09	0.003	0.086	0.246	0.094	0.045	0.464	0.191	0.194	0.2	0.023	0.025	0.057	0.001	0.001	0.464	intronic	GRM8	.
6	154252703	rs6918042	C	T	0.42	0.59	0.48	0.3	0.11	0.09	0.62	0.48	0.38	0.19	0.5	0.39	0.21	-0.03	-0.14	-0.32	0.5	0.078	0.018	0.065	0.157	0.445	0.004	0.464	0.43	0.275	0.1	0.453	0.294	0.117	0.005	0.034	0.186	0.464	intronic	IPCEF1	.
17	33358512	rs55733731	T	A	0.43	0.57	0.4	0.39	0.06	0.15	0.48	0.5	0.34	0.33	0.42	0.25	0.24	0.09	-0.08	-0.09	0.5	0.022	0.046	0.003	0.05	0.359	0.034	0.218	0.463	0.243	0.232	0.304	0.124	0.117	0.005	0.013	0.016	0.463	intronic	ASIC2	.
3	6913186	rs11921083	C	T	0.67	0.48	0.7	0.71	0.16	0.66	0.36	0.32	0.55	0.55	-0.18	0.05	0.05	0.12	0.35	0.35	0.55	0.05	0.103	0.003	0.094	0.097	0.41	0.158	0.219	0.463	0.449	0.057	0.002	0	0.023	0.217	0.206	0.463	intronic	GRM7	.
10	113070547	rs4918791	G	A	0.42	0.64	0.46	0.37	0.13	0.38	0.62	0.51	0.33	0.25	0.25	0.07	-0.01	0.02	-0.16	-0.25	0.51	0.055	0.059	0.012	0.13	0.416	0.16	0.102	0.463	0.231	0.146	0.125	0.009	0.004	0.004	0.043	0.107	0.463	intronic	TCF7L2	.
6	34156101	rs55726226	G	A	0.48	0.35	0.43	0.54	0.02	0.41	0.49	0.33	0.4	0.52	-0.07	0.01	0.13	-0.14	-0.06	0.05	0.52	0.034	0.014	0.021	0.077	0.447	0.371	0.007	0.322	0.357	0.463	0.006	0.003	0.029	0.04	0.002	0.002	0.463	upstream	GRM4	.
3	6858976	rs340653	G	A	0.9	0.84	0.91	0.9	0.4	0.65	0.85	0.44	0.5	0.5	0.19	0.25	0.25	-0.01	0.05	0.05	0.5	0.003	0.012	0.004	0.008	0.354	0.112	0.1	0.337	0.462	0.457	0.092	0.19	0.182	0.006	0.011	0.008	0.462	intergenic	GRM7-AS3;GRM7	.
12	6379284	rs11064153	T	C	0.39	0.73	0.38	0.34	0.49	0.18	0.6	0.24	-0.11	-0.15	0.55	0.2	0.16	0.14	-0.22	-0.26	0.55	0.122	0.184	0.005	0.256	0.018	0.188	0.303	0.101	0.012	0.044	0.462	0.102	0.054	0.03	0.071	0.125	0.462	intergenic	SCNN1A(dist=1927),LTBR(dist=4907)	.
17	33053293	rs12450465	C	T	0.48	0.73	0.45	0.5	0.17	0.38	0.67	0.56	0.29	0.33	0.34	0.07	0.11	0.06	-0.21	-0.17	0.56	0.049	0.117	0.002	0.076	0.406	0.108	0.143	0.462	0.161	0.21	0.181	0.004	0.023	0.002	0.086	0.05	0.462	intronic	ASIC2	.
17	33052564	rs16579	C	G	0.48	0.73	0.45	0.5	0.17	0.38	0.67	0.56	0.29	0.33	0.34	0.07	0.11	0.06	-0.21	-0.17	0.56	0.049	0.117	0.002	0.076	0.406	0.108	0.143	0.462	0.161	0.21	0.181	0.004	0.023	0.002	0.086	0.05	0.462	intronic	ASIC2	.
17	34102685	rs7225845	T	C	0.91	0.96	0.9	0.92	0.44	0.9	0.9	0.53	0.46	0.49	0.06	0	0.02	0.06	-0.01	0.02	0.53	0.004	0.015	0	0.003	0.391	0.383	0.005	0.451	0.414	0.462	0.019	0.004	0.001	0.016	0.004	0	0.462	intronic	ASIC2	.
21	34992468	rs8127225	C	T	0.86	0.81	0.88	0.83	0.36	0.85	0.87	0.45	0.53	0.47	-0.04	0.03	-0.02	-0.06	0.01	-0.04	0.53	0.004	0.011	0.006	0.004	0.436	0.398	0.002	0.345	0.462	0.387	0.002	0	0.003	0.007	0.004	0.003	0.462	intronic	RUNX1	.
7	126775415	rs2299518	G	A	0.64	0.91	0.66	0.59	0.41	0.49	0.93	0.5	0.25	0.18	0.42	0.17	0.1	-0.02	-0.27	-0.34	0.5	0.079	0.12	0.008	0.182	0.461	0.009	0.376	0.389	0.126	0.065	0.302	0.061	0.019	0.001	0.172	0.239	0.461	intronic	GRM8	.
6	88168233	rs2180619	G	A	0.61	0.88	0.59	0.61	0.31	0.54	0.76	0.56	0.27	0.29	0.34	0.05	0.07	0.12	-0.17	-0.15	0.56	0.07	0.159	0.002	0.133	0.326	0.095	0.094	0.46	0.133	0.16	0.211	0	0.007	0.032	0.059	0.041	0.46	intergenic	CNR1;LOC101928936	.
17	3593151	rs35408484	C	T	0.72	0.8	0.69	0.75	0.27	0.74	0.82	0.53	0.42	0.48	0.06	-0.05	0.01	-0.01	-0.12	-0.07	0.53	0.012	0.029	0.007	0.003	0.46	0.363	0.01	0.437	0.289	0.373	0.003	0.004	0.004	0.006	0.04	0.009	0.46	intronic	TRPV1	.
6	34155614	rs9380410	G	T	0.48	0.35	0.44	0.54	0.02	0.41	0.49	0.33	0.42	0.52	-0.07	0.03	0.13	-0.14	-0.05	0.05	0.52	0.031	0.018	0.015	0.074	0.447	0.371	0.007	0.322	0.368	0.46	0.006	0.002	0.028	0.04	0	0.001	0.46	UTR5	GRM4	.
16	53853555	rs13337898	T	C	0.73	0.39	0.8	0.75	0.54	0.79	0.26	-0.15	0.27	0.21	-0.41	0.01	-0.05	0.12	0.54	0.48	0.54	0.175	0.335	0.006	0.255	0.142	0.132	0.437	0.047	0.152	0.092	0.309	0.003	0.002	0.023	0.459	0.381	0.459	intronic	FTO	.
3	6914047	rs9311966	C	T	0.6	0.47	0.63	0.63	0.09	0.53	0.36	0.38	0.54	0.54	-0.06	0.1	0.11	0.11	0.27	0.27	0.54	0.021	0.045	0.003	0.045	0.182	0.362	0.05	0.321	0.459	0.454	0	0.019	0.019	0.02	0.134	0.134	0.459	intronic	GRM7	.
7	141774217	rs11767205	T	G	0.43	0.73	0.4	0.39	0.18	0.44	0.68	0.55	0.22	0.21	0.29	-0.04	-0.05	0.05	-0.28	-0.29	0.55	0.093	0.173	0.003	0.186	0	0	0	0.457	0.107	0.096	0.141	0.002	0.001	0.001	0.137	0.149	0.457	intergenic	TAS2R3;TAS2R4	.
6	34039210	rs2451386	G	T	0.72	0.59	0.68	0.79	0.25	0.76	0.59	0.34	0.43	0.54	-0.17	-0.08	0.03	0	0.09	0.2	0.54	0.049	0.017	0.033	0.111	0.211	0.414	0.059	0.192	0.299	0.457	0.077	0.015	0.001	0.005	0.009	0.09	0.457	intronic	GRM4	.
3	7176859	rs10510350	C	G	0.72	0.76	0.71	0.75	0.25	0.61	0.8	0.51	0.46	0.5	0.15	0.1	0.14	-0.04	-0.09	-0.04	0.51	0.001	0.002	0.002	0.005	0.457	0.232	0.075	0.401	0.357	0.417	0.039	0.022	0.051	0	0.012	0.001	0.457	intronic	GRM7	.
15	25435414	rs2158306	T	C	0.74	0.67	0.72	0.76	0.24	0.78	0.59	0.44	0.48	0.52	-0.11	-0.07	-0.02	0.08	0.12	0.17	0.52	0.006	0.002	0.005	0.017	0.228	0.457	0.076	0.327	0.366	0.438	0.023	0.009	0.004	0.01	0.028	0.067	0.457	intronic	UBE3A	.
6	34156593	rs35375008	G	A	0.48	0.35	0.43	0.54	0.02	0.41	0.49	0.33	0.41	0.51	-0.07	0.02	0.12	-0.14	-0.06	0.05	0.51	0.031	0.015	0.016	0.072	0.447	0.371	0.007	0.322	0.361	0.457	0.006	0.003	0.026	0.04	0.001	0	0.457	upstream	GRM4	.
1	8937003	rs79066421	G	A	0.44	0.7	0.46	0.42	0.18	0.2	0.65	0.52	0.28	0.25	0.5	0.26	0.23	0.05	-0.19	-0.23	0.52	0.069	0.133	0.003	0.144	0.375	0.003	0.344	0.456	0.141	0.131	0.422	0.118	0.108	0.002	0.082	0.091	0.456	intergenic	ENO1-AS1;CA6	.
16	53987891	rs17823912	T	C	0.49	0.14	0.56	0.52	0.41	0.35	0.04	-0.26	0.16	0.11	-0.21	0.21	0.16	0.11	0.53	0.48	0.53	0.141	0.295	0.002	0.238	0.32	0.001	0.271	0.15	0.041	0.016	0.105	0.077	0.042	0.063	0.456	0.394	0.456	intronic	FTO	.
7	80506999	rs6979450	T	A	0.88	0.84	0.89	0.87	0.37	0.9	0.85	0.47	0.52	0.5	-0.06	-0.01	-0.03	-0.01	0.04	0.02	0.52	0.002	0.001	0.003	0.002	0.384	0.456	0.006	0.365	0.45	0.439	0.007	0.003	0.001	0.006	0.001	0.002	0.456	intronic	GNAT3	.
7	126648185	rs10487455	C	T	0.45	0.66	0.44	0.42	0.13	0.32	0.47	0.53	0.31	0.29	0.34	0.12	0.1	0.19	-0.03	-0.04	0.53	0.041	0.084	0.004	0.086	0.236	0.099	0.037	0.456	0.191	0.187	0.187	0.02	0.019	0.058	0.002	0.002	0.456	intronic	GRM8	.
7	126648432	rs10487456	T	C	0.45	0.66	0.44	0.42	0.13	0.32	0.47	0.53	0.31	0.29	0.34	0.12	0.1	0.19	-0.03	-0.04	0.53	0.041	0.084	0.003	0.085	0.236	0.099	0.037	0.456	0.191	0.188	0.187	0.02	0.02	0.058	0.002	0.002	0.456	intronic	GRM8	.
7	126650706	rs10808224	C	A	0.45	0.66	0.44	0.43	0.13	0.32	0.47	0.53	0.31	0.3	0.34	0.12	0.11	0.19	-0.03	-0.04	0.53	0.04	0.084	0.003	0.08	0.236	0.099	0.037	0.456	0.191	0.194	0.187	0.02	0.022	0.058	0.002	0.003	0.456	intronic	GRM8	.
7	126650764	rs10808225	G	A	0.45	0.66	0.44	0.43	0.13	0.32	0.47	0.53	0.31	0.3	0.34	0.12	0.1	0.19	-0.03	-0.04	0.53	0.041	0.084	0.003	0.085	0.236	0.099	0.037	0.456	0.191	0.188	0.187	0.02	0.019	0.058	0.002	0.002	0.456	intronic	GRM8	.
7	126650944	rs10808226	G	A	0.45	0.66	0.44	0.43	0.13	0.32	0.47	0.53	0.31	0.3	0.34	0.12	0.11	0.19	-0.03	-0.04	0.53	0.04	0.084	0.003	0.08	0.236	0.099	0.037	0.456	0.191	0.194	0.187	0.02	0.022	0.058	0.002	0.003	0.456	intronic	GRM8	.
7	126625835	rs10954125	T	C	0.45	0.65	0.44	0.42	0.13	0.32	0.48	0.52	0.31	0.29	0.33	0.12	0.1	0.18	-0.03	-0.05	0.52	0.04	0.082	0.003	0.085	0.246	0.099	0.042	0.456	0.194	0.188	0.187	0.022	0.02	0.052	0.001	0	0.456	intronic	GRM8	.
7	126639285	rs10954127	T	C	0.45	0.66	0.44	0.43	0.13	0.32	0.48	0.53	0.31	0.3	0.34	0.12	0.11	0.18	-0.04	-0.04	0.53	0.039	0.084	0.003	0.077	0.246	0.099	0.042	0.456	0.191	0.197	0.187	0.02	0.024	0.052	0.001	0.002	0.456	intronic	GRM8	.
7	126639775	rs11975108	T	C	0.45	0.67	0.44	0.43	0.13	0.32	0.48	0.53	0.3	0.3	0.34	0.11	0.11	0.19	-0.04	-0.05	0.53	0.043	0.093	0.003	0.086	0.239	0.093	0.042	0.456	0.181	0.188	0.194	0.019	0.022	0.057	0	0.001	0.456	intronic	GRM8	.
7	126619936	rs11976133	C	T	0.45	0.66	0.44	0.42	0.13	0.32	0.48	0.53	0.31	0.29	0.34	0.12	0.1	0.18	-0.04	-0.05	0.53	0.041	0.084	0.003	0.085	0.246	0.099	0.042	0.456	0.191	0.188	0.187	0.02	0.02	0.052	0.001	0	0.456	intronic	GRM8	.
7	126600250	rs11980682	C	T	0.45	0.66	0.44	0.43	0.13	0.32	0.48	0.53	0.31	0.3	0.34	0.12	0.11	0.18	-0.04	-0.05	0.53	0.04	0.087	0.003	0.08	0.246	0.094	0.045	0.456	0.187	0.194	0.192	0.021	0.025	0.052	0	0.001	0.456	intronic	GRM8	.
7	126612381	rs12533174	C	T	0.45	0.66	0.44	0.43	0.13	0.32	0.48	0.53	0.31	0.3	0.34	0.11	0.11	0.18	-0.04	-0.04	0.53	0.04	0.087	0.003	0.08	0.246	0.099	0.042	0.456	0.188	0.194	0.187	0.019	0.022	0.052	0	0.001	0.456	intronic	GRM8	.
7	126646547	rs1419484	G	A	0.46	0.66	0.44	0.43	0.13	0.32	0.47	0.53	0.31	0.3	0.34	0.12	0.11	0.19	-0.03	-0.04	0.53	0.039	0.084	0.003	0.08	0.236	0.099	0.037	0.456	0.191	0.194	0.187	0.02	0.022	0.058	0.002	0.003	0.456	intronic	GRM8	.
7	126646754	rs1419485	G	T	0.45	0.66	0.44	0.42	0.13	0.32	0.47	0.53	0.31	0.29	0.34	0.12	0.1	0.19	-0.03	-0.04	0.53	0.041	0.084	0.003	0.085	0.236	0.099	0.037	0.456	0.191	0.188	0.187	0.02	0.02	0.058	0.002	0.002	0.456	intronic	GRM8	.
7	126650182	rs1579215	T	C	0.45	0.66	0.44	0.43	0.13	0.32	0.47	0.53	0.31	0.3	0.34	0.12	0.1	0.19	-0.03	-0.04	0.53	0.04	0.084	0.003	0.082	0.236	0.099	0.037	0.456	0.191	0.191	0.187	0.02	0.021	0.058	0.002	0.002	0.456	intronic	GRM8	.
7	126647517	rs17612358	C	T	0.46	0.66	0.44	0.43	0.13	0.32	0.47	0.53	0.31	0.3	0.34	0.12	0.11	0.19	-0.03	-0.04	0.53	0.039	0.084	0.003	0.08	0.236	0.099	0.037	0.456	0.191	0.194	0.187	0.02	0.023	0.058	0.002	0.003	0.456	intronic	GRM8	.
7	126561905	rs1946111	G	A	0.45	0.66	0.42	0.43	0.13	0.32	0.48	0.53	0.29	0.3	0.34	0.11	0.11	0.18	-0.05	-0.05	0.53	0.043	0.096	0.003	0.081	0.246	0.094	0.045	0.456	0.177	0.193	0.192	0.016	0.024	0.052	0.002	0.001	0.456	intronic	GRM8	.
7	126555572	rs1946112	C	T	0.45	0.67	0.44	0.43	0.13	0.31	0.48	0.53	0.3	0.3	0.35	0.12	0.12	0.19	-0.04	-0.05	0.53	0.042	0.093	0.003	0.083	0.239	0.085	0.049	0.456	0.182	0.191	0.206	0.023	0.029	0.057	0	0.002	0.456	intronic	GRM8	.
7	126639884	rs2027988	A	G	0.46	0.66	0.44	0.43	0.13	0.32	0.48	0.53	0.31	0.3	0.34	0.12	0.11	0.18	-0.04	-0.05	0.53	0.039	0.084	0.003	0.08	0.246	0.099	0.042	0.456	0.191	0.194	0.187	0.02	0.022	0.052	0.001	0.001	0.456	intronic	GRM8	.
7	126640313	rs2027990	G	A	0.46	0.66	0.44	0.43	0.13	0.33	0.48	0.53	0.31	0.3	0.33	0.11	0.11	0.18	-0.04	-0.04	0.53	0.039	0.084	0.003	0.08	0.246	0.103	0.039	0.456	0.191	0.194	0.181	0.018	0.02	0.052	0.001	0.001	0.456	intronic	GRM8	.
7	126649684	rs2078809	G	A	0.46	0.66	0.44	0.43	0.13	0.32	0.47	0.53	0.31	0.3	0.34	0.12	0.1	0.19	-0.03	-0.04	0.53	0.039	0.084	0.003	0.08	0.236	0.099	0.037	0.456	0.191	0.194	0.187	0.02	0.022	0.058	0.002	0.003	0.456	intronic	GRM8	.
7	126649421	rs2097641	G	A	0.46	0.66	0.44	0.43	0.13	0.32	0.47	0.53	0.31	0.3	0.34	0.11	0.11	0.19	-0.03	-0.04	0.53	0.04	0.087	0.003	0.08	0.236	0.099	0.037	0.456	0.187	0.194	0.187	0.019	0.022	0.058	0.002	0.003	0.456	intronic	GRM8	.
7	126640850	rs2237750	A	C	0.45	0.66	0.44	0.43	0.13	0.32	0.48	0.53	0.31	0.3	0.34	0.12	0.11	0.18	-0.04	-0.04	0.53	0.04	0.085	0.003	0.08	0.246	0.099	0.042	0.456	0.191	0.194	0.187	0.02	0.023	0.052	0	0.001	0.456	intronic	GRM8	.
7	126645158	rs2237755	G	T	0.46	0.66	0.44	0.43	0.13	0.32	0.47	0.53	0.31	0.3	0.34	0.12	0.11	0.19	-0.03	-0.03	0.53	0.039	0.084	0.003	0.078	0.236	0.099	0.037	0.456	0.191	0.197	0.187	0.02	0.024	0.058	0.002	0.003	0.456	intronic	GRM8	.
7	126645628	rs2237757	T	C	0.45	0.66	0.44	0.43	0.13	0.32	0.47	0.53	0.31	0.3	0.34	0.11	0.11	0.19	-0.03	-0.04	0.53	0.041	0.087	0.003	0.08	0.236	0.099	0.037	0.456	0.187	0.194	0.187	0.019	0.022	0.058	0.002	0.003	0.456	intronic	GRM8	.
7	126645663	rs2237758	T	C	0.45	0.66	0.44	0.43	0.13	0.32	0.47	0.53	0.31	0.3	0.34	0.11	0.11	0.19	-0.03	-0.04	0.53	0.04	0.087	0.003	0.08	0.236	0.099	0.037	0.456	0.187	0.194	0.187	0.019	0.022	0.058	0.002	0.003	0.456	intronic	GRM8	.
7	126645678	rs2237759	G	T	0.45	0.66	0.44	0.43	0.13	0.32	0.47	0.53	0.31	0.3	0.34	0.11	0.11	0.19	-0.03	-0.04	0.53	0.04	0.087	0.003	0.08	0.236	0.099	0.037	0.456	0.187	0.194	0.187	0.019	0.022	0.058	0.002	0.003	0.456	intronic	GRM8	.
7	126635264	rs2299485	T	C	0.45	0.66	0.44	0.43	0.13	0.32	0.48	0.53	0.31	0.3	0.34	0.11	0.1	0.18	-0.04	-0.05	0.53	0.041	0.087	0.003	0.082	0.246	0.099	0.042	0.456	0.187	0.191	0.187	0.019	0.021	0.052	0	0.001	0.456	intronic	GRM8	.
7	126653659	rs2299487	A	G	0.45	0.66	0.44	0.42	0.13	0.32	0.47	0.53	0.31	0.29	0.34	0.12	0.1	0.19	-0.03	-0.04	0.53	0.041	0.084	0.003	0.085	0.236	0.099	0.037	0.456	0.191	0.188	0.187	0.02	0.02	0.058	0.002	0.002	0.456	intronic	GRM8	.
7	126653725	rs2299488	C	T	0.45	0.66	0.44	0.43	0.13	0.32	0.47	0.53	0.31	0.3	0.34	0.11	0.1	0.19	-0.03	-0.04	0.53	0.042	0.087	0.004	0.085	0.236	0.099	0.037	0.456	0.188	0.188	0.187	0.019	0.019	0.058	0.002	0.002	0.456	intronic	GRM8	.
7	126654179	rs2299491	C	T	0.46	0.66	0.44	0.43	0.13	0.32	0.47	0.53	0.31	0.3	0.34	0.12	0.11	0.19	-0.03	-0.04	0.53	0.04	0.084	0.003	0.083	0.236	0.099	0.037	0.456	0.191	0.191	0.187	0.02	0.021	0.058	0.002	0.002	0.456	intronic	GRM8	.
7	126642267	rs28620360	C	T	0.45	0.66	0.44	0.42	0.13	0.32	0.47	0.53	0.31	0.29	0.34	0.12	0.1	0.19	-0.03	-0.04	0.53	0.041	0.084	0.003	0.085	0.236	0.099	0.037	0.456	0.191	0.188	0.187	0.02	0.02	0.058	0.002	0.002	0.456	intronic	GRM8	.
7	126642584	rs28690571	G	A	0.45	0.66	0.44	0.43	0.13	0.32	0.46	0.53	0.31	0.3	0.34	0.12	0.11	0.2	-0.02	-0.03	0.53	0.04	0.084	0.003	0.08	0.231	0.099	0.034	0.456	0.191	0.194	0.187	0.02	0.022	0.061	0.003	0.003	0.456	intronic	GRM8	.
7	126642134	rs28709262	T	C	0.45	0.66	0.44	0.41	0.13	0.32	0.47	0.53	0.31	0.28	0.34	0.12	0.09	0.19	-0.02	-0.05	0.53	0.042	0.084	0.003	0.09	0.236	0.099	0.037	0.456	0.191	0.182	0.187	0.02	0.017	0.058	0.002	0.001	0.456	intronic	GRM8	.
7	126648912	rs3808157	C	T	0.45	0.66	0.44	0.42	0.13	0.32	0.47	0.53	0.31	0.29	0.34	0.12	0.1	0.19	-0.03	-0.04	0.53	0.041	0.084	0.003	0.087	0.236	0.099	0.037	0.456	0.191	0.185	0.187	0.02	0.019	0.058	0.002	0.001	0.456	intronic	GRM8	.
7	126644282	rs3824013	C	G	0.45	0.66	0.44	0.43	0.13	0.32	0.47	0.53	0.31	0.3	0.34	0.12	0.11	0.19	-0.03	-0.04	0.53	0.04	0.084	0.003	0.08	0.236	0.099	0.037	0.456	0.191	0.194	0.187	0.02	0.022	0.058	0.002	0.003	0.456	intronic	GRM8	.
7	126640376	rs3824019	T	G	0.45	0.66	0.44	0.43	0.13	0.33	0.48	0.53	0.31	0.3	0.33	0.11	0.1	0.18	-0.04	-0.04	0.53	0.04	0.084	0.003	0.082	0.246	0.103	0.039	0.456	0.191	0.191	0.181	0.018	0.019	0.052	0.001	0.001	0.456	intronic	GRM8	.
7	126640346	rs3824020	G	C	0.45	0.66	0.44	0.43	0.13	0.33	0.48	0.53	0.31	0.3	0.33	0.11	0.1	0.18	-0.04	-0.05	0.53	0.04	0.084	0.003	0.083	0.246	0.103	0.039	0.456	0.191	0.191	0.181	0.018	0.019	0.052	0.001	0.001	0.456	intronic	GRM8	.
7	126610924	rs3824024	C	T	0.45	0.66	0.44	0.43	0.13	0.32	0.48	0.53	0.31	0.3	0.34	0.12	0.11	0.18	-0.04	-0.05	0.53	0.039	0.084	0.003	0.08	0.246	0.099	0.042	0.456	0.191	0.194	0.187	0.02	0.022	0.052	0.001	0.001	0.456	intronic	GRM8	.
7	126618701	rs4543482	C	G	0.45	0.66	0.44	0.43	0.13	0.32	0.48	0.53	0.31	0.3	0.34	0.12	0.11	0.18	-0.04	-0.05	0.53	0.039	0.084	0.003	0.08	0.246	0.099	0.042	0.456	0.191	0.194	0.187	0.02	0.022	0.052	0.001	0.001	0.456	intronic	GRM8	.
7	126649101	rs55799445	A	G	0.45	0.66	0.44	0.41	0.13	0.32	0.47	0.53	0.31	0.28	0.34	0.11	0.09	0.19	-0.03	-0.05	0.53	0.044	0.087	0.003	0.093	0.236	0.099	0.037	0.456	0.188	0.179	0.187	0.019	0.016	0.058	0.002	0	0.456	intronic	GRM8	.
7	126649107	rs56407402	G	A	0.45	0.66	0.44	0.42	0.13	0.32	0.47	0.53	0.31	0.29	0.34	0.11	0.1	0.19	-0.03	-0.05	0.53	0.042	0.087	0.003	0.088	0.236	0.099	0.037	0.456	0.188	0.185	0.187	0.019	0.018	0.058	0.002	0.001	0.456	intronic	GRM8	.
7	126620236	rs62477898	T	G	0.45	0.66	0.44	0.43	0.13	0.32	0.48	0.53	0.31	0.3	0.34	0.12	0.11	0.18	-0.04	-0.05	0.53	0.04	0.084	0.003	0.082	0.246	0.094	0.045	0.456	0.191	0.191	0.192	0.023	0.023	0.052	0.001	0.001	0.456	intronic	GRM8	.
7	126627029	rs62477904	T	C	0.45	0.66	0.44	0.43	0.13	0.32	0.48	0.53	0.31	0.3	0.34	0.12	0.11	0.18	-0.04	-0.04	0.53	0.039	0.084	0.003	0.078	0.246	0.099	0.042	0.456	0.191	0.197	0.187	0.02	0.024	0.052	0.001	0.002	0.456	intronic	GRM8	.
7	126636662	rs62477906	T	C	0.45	0.66	0.43	0.43	0.13	0.32	0.48	0.53	0.3	0.3	0.34	0.1	0.1	0.18	-0.05	-0.05	0.53	0.043	0.093	0.003	0.083	0.246	0.099	0.042	0.456	0.181	0.19	0.187	0.016	0.021	0.052	0.002	0.001	0.456	intronic	GRM8	.
7	126640725	rs62477907	T	C	0.45	0.66	0.44	0.43	0.13	0.32	0.48	0.53	0.31	0.3	0.34	0.12	0.1	0.18	-0.04	-0.05	0.53	0.04	0.084	0.003	0.083	0.246	0.099	0.042	0.456	0.191	0.191	0.187	0.02	0.021	0.052	0.001	0.001	0.456	intronic	GRM8	.
7	126636748	rs66619230	A	T	0.46	0.66	0.44	0.43	0.13	0.32	0.48	0.53	0.31	0.3	0.34	0.11	0.11	0.18	-0.04	-0.05	0.53	0.041	0.087	0.003	0.083	0.246	0.099	0.042	0.456	0.187	0.19	0.187	0.019	0.021	0.052	0	0.001	0.456	intronic	GRM8	.
7	126653202	rs66731753	C	T	0.45	0.66	0.44	0.43	0.13	0.32	0.47	0.53	0.31	0.3	0.34	0.11	0.11	0.19	-0.03	-0.04	0.53	0.041	0.087	0.003	0.08	0.236	0.099	0.037	0.456	0.187	0.194	0.187	0.019	0.022	0.058	0.002	0.003	0.456	intronic	GRM8	.
7	126635804	rs6946642	C	A	0.46	0.66	0.44	0.44	0.13	0.32	0.48	0.53	0.31	0.31	0.34	0.12	0.11	0.18	-0.04	-0.04	0.53	0.039	0.084	0.003	0.078	0.246	0.099	0.042	0.456	0.191	0.197	0.187	0.02	0.024	0.052	0.001	0.002	0.456	intronic	GRM8	.
7	126643057	rs6946865	G	A	0.46	0.66	0.44	0.43	0.13	0.32	0.47	0.53	0.31	0.3	0.34	0.12	0.11	0.19	-0.03	-0.04	0.53	0.039	0.084	0.003	0.08	0.236	0.099	0.037	0.456	0.191	0.194	0.187	0.02	0.022	0.058	0.002	0.003	0.456	intronic	GRM8	.
7	126632084	rs6954541	G	A	0.45	0.66	0.44	0.43	0.13	0.32	0.48	0.53	0.31	0.3	0.34	0.11	0.1	0.18	-0.04	-0.05	0.53	0.041	0.087	0.003	0.083	0.246	0.099	0.042	0.456	0.188	0.191	0.187	0.019	0.021	0.052	0	0.001	0.456	intronic	GRM8	.
7	126764989	rs72607738	C	T	0.43	0.67	0.42	0.4	0.13	0.33	0.49	0.53	0.29	0.27	0.34	0.09	0.07	0.18	-0.07	-0.09	0.53	0.054	0.11	0.003	0.109	0.255	0.097	0.048	0.456	0.162	0.161	0.188	0.009	0.009	0.047	0.009	0.009	0.456	intronic	GRM8	.
7	126638754	rs728600	A	G	0.45	0.66	0.44	0.42	0.13	0.32	0.48	0.53	0.31	0.29	0.34	0.12	0.1	0.18	-0.04	-0.05	0.53	0.041	0.084	0.003	0.085	0.246	0.099	0.042	0.456	0.191	0.188	0.187	0.02	0.02	0.052	0.001	0	0.456	intronic	GRM8	.
7	126638731	rs728601	G	A	0.45	0.66	0.44	0.42	0.13	0.32	0.48	0.53	0.31	0.29	0.34	0.11	0.1	0.18	-0.04	-0.05	0.53	0.041	0.087	0.003	0.085	0.246	0.099	0.042	0.456	0.188	0.188	0.187	0.019	0.02	0.052	0	0	0.456	intronic	GRM8	.
7	126617200	rs7459161	A	T	0.45	0.66	0.44	0.43	0.13	0.32	0.48	0.53	0.31	0.3	0.34	0.12	0.1	0.18	-0.04	-0.05	0.53	0.04	0.084	0.003	0.082	0.246	0.099	0.042	0.456	0.191	0.191	0.187	0.02	0.021	0.052	0.001	0.001	0.456	intronic	GRM8	.
7	126655887	rs7792592	C	T	0.45	0.66	0.44	0.43	0.13	0.32	0.47	0.53	0.31	0.3	0.34	0.11	0.11	0.19	-0.03	-0.04	0.53	0.04	0.087	0.003	0.08	0.236	0.099	0.037	0.456	0.187	0.194	0.187	0.019	0.022	0.058	0.002	0.003	0.456	intronic	GRM8	.
16	53990895	rs62035806	G	A	0.51	0.17	0.59	0.54	0.43	0.37	0.05	-0.26	0.16	0.12	-0.21	0.21	0.17	0.11	0.53	0.49	0.53	0.137	0.282	0	0.237	0.313	0.001	0.264	0.134	0.042	0.021	0.092	0.077	0.049	0.066	0.455	0.405	0.455	intronic	FTO	.
6	34039120	rs3798529	C	A	0.72	0.59	0.68	0.79	0.25	0.76	0.59	0.34	0.43	0.54	-0.17	-0.08	0.03	0	0.09	0.2	0.54	0.048	0.017	0.033	0.109	0.211	0.414	0.059	0.192	0.298	0.455	0.077	0.016	0.002	0.005	0.009	0.088	0.455	intronic	GRM4	.
17	34117412	rs7221159	G	A	0.84	0.79	0.81	0.87	0.37	0.89	0.82	0.42	0.44	0.5	-0.11	-0.08	-0.03	-0.03	-0.01	0.05	0.5	0.011	0.002	0.006	0.03	0.349	0.454	0.017	0.282	0.36	0.441	0.047	0.016	0.001	0	0.004	0.006	0.454	intronic	ASIC2	.
16	53853232	rs13334039	C	T	0.73	0.37	0.8	0.75	0.54	0.79	0.26	-0.17	0.27	0.21	-0.42	0.01	-0.04	0.11	0.54	0.49	0.54	0.186	0.346	0.004	0.277	0.142	0.132	0.437	0.057	0.147	0.096	0.326	0.004	0	0.016	0.454	0.387	0.454	intronic	FTO	.
16	53853499	rs13337587	A	G	0.73	0.37	0.8	0.75	0.54	0.79	0.26	-0.17	0.27	0.21	-0.42	0.01	-0.04	0.11	0.54	0.49	0.54	0.185	0.346	0.004	0.275	0.142	0.132	0.437	0.057	0.147	0.095	0.326	0.004	0.001	0.016	0.454	0.385	0.454	intronic	FTO	.
3	7722548	rs162799	T	C	0.8	0.83	0.83	0.74	0.3	0.76	0.84	0.52	0.53	0.44	0.06	0.07	-0.03	-0.01	-0.01	-0.1	0.53	0.014	0.006	0.019	0.017	0.453	0.349	0.014	0.432	0.447	0.323	0.009	0.01	0.003	0.006	0.004	0.024	0.453	intronic	GRM7	.
7	127076252	rs1419447	A	G	0.76	0.92	0.8	0.72	0.38	0.6	0.9	0.54	0.42	0.34	0.32	0.2	0.13	0.01	-0.11	-0.18	0.54	0.041	0.051	0.009	0.1	0.453	0.085	0.221	0.451	0.295	0.21	0.224	0.082	0.031	0.004	0.043	0.092	0.453	intronic	GRM8	.
7	141785401	rs56148721	C	T	0.44	0.73	0.41	0.4	0.19	0.45	0.68	0.55	0.22	0.21	0.28	-0.05	-0.05	0.05	-0.28	-0.28	0.55	0.091	0.17	0.003	0.184	0.397	0.146	0.099	0.452	0.106	0.095	0.134	0.001	0.002	0.001	0.133	0.145	0.452	intergenic	TAS2R4;TAS2R5	.
6	34155713	rs13195631	G	T	0.48	0.35	0.44	0.54	0.03	0.41	0.49	0.32	0.41	0.52	-0.07	0.02	0.13	-0.14	-0.05	0.05	0.52	0.031	0.017	0.016	0.074	0.438	0.362	0.007	0.31	0.356	0.452	0.006	0.003	0.028	0.04	0	0.001	0.452	upstream	GRM4	.
6	32998165	rs176248	A	G	0.85	0.77	0.88	0.87	0.36	0.71	0.85	0.41	0.52	0.51	0.07	0.18	0.16	-0.08	0.03	0.02	0.52	0.017	0.038	0.003	0.031	0.402	0.211	0.058	0.278	0.451	0.441	0.003	0.085	0.076	0.019	0.002	0.003	0.451	intergenic	BRD2;HLA-DOA	.
3	7177273	rs11131065	C	T	0.72	0.76	0.71	0.75	0.25	0.59	0.8	0.5	0.46	0.5	0.17	0.12	0.16	-0.04	-0.09	-0.04	0.5	0.001	0.002	0.002	0.005	0.451	0.204	0.09	0.395	0.353	0.413	0.051	0.033	0.066	0	0.011	0.001	0.451	intronic	GRM7	.
6	88166822	rs9344756	G	A	0.61	0.87	0.61	0.6	0.31	0.54	0.75	0.56	0.29	0.29	0.33	0.07	0.06	0.12	-0.15	-0.15	0.56	0.063	0.136	0.004	0.129	0.319	0.095	0.09	0.451	0.15	0.156	0.202	0.004	0.005	0.03	0.045	0.041	0.451	upstream	CNR1	.
6	88166857	rs9353526	G	T	0.6	0.87	0.59	0.59	0.31	0.54	0.75	0.56	0.27	0.27	0.34	0.05	0.05	0.12	-0.16	-0.16	0.56	0.071	0.151	0.003	0.143	0.319	0.091	0.094	0.451	0.134	0.141	0.207	0.001	0.003	0.03	0.056	0.051	0.451	upstream	CNR1	.
6	88166862	rs9362466	C	T	0.61	0.87	0.61	0.6	0.31	0.54	0.75	0.56	0.29	0.28	0.33	0.07	0.06	0.12	-0.15	-0.15	0.56	0.064	0.136	0.004	0.135	0.319	0.095	0.09	0.451	0.15	0.15	0.202	0.004	0.004	0.03	0.045	0.045	0.451	upstream	CNR1	.
7	126556520	rs1858952	G	T	0.45	0.67	0.44	0.43	0.14	0.31	0.48	0.53	0.3	0.29	0.35	0.12	0.12	0.19	-0.04	-0.05	0.53	0.043	0.093	0.003	0.084	0.233	0.08	0.049	0.449	0.176	0.185	0.206	0.023	0.029	0.057	0	0.002	0.449	intronic	GRM8	.
7	126556031	rs7455156	T	C	0.45	0.67	0.43	0.43	0.14	0.31	0.48	0.53	0.29	0.29	0.35	0.12	0.11	0.19	-0.04	-0.05	0.53	0.045	0.096	0.003	0.088	0.233	0.08	0.049	0.449	0.172	0.179	0.206	0.022	0.026	0.057	0.001	0.001	0.449	intronic	GRM8	.
1	8941503	rs17032875	T	C	0.53	0.77	0.55	0.52	0.42	0.25	0.74	0.36	0.13	0.1	0.53	0.3	0.27	0.03	-0.19	-0.22	0.53	0.064	0.131	0.004	0.133	0.187	0.058	0.384	0.241	0.019	0.018	0.448	0.142	0.14	0.001	0.087	0.089	0.448	intergenic	ENO1-AS1;CA6	.
7	126631221	rs10954126	A	T	0.45	0.65	0.44	0.43	0.13	0.32	0.48	0.52	0.31	0.3	0.33	0.12	0.11	0.18	-0.04	-0.05	0.52	0.037	0.079	0.003	0.075	0.246	0.099	0.042	0.448	0.191	0.194	0.179	0.02	0.022	0.047	0.001	0.001	0.448	intronic	GRM8	.
7	126643497	rs12667751	T	A	0.45	0.65	0.44	0.43	0.13	0.32	0.47	0.52	0.31	0.3	0.33	0.12	0.11	0.19	-0.03	-0.04	0.52	0.037	0.079	0.003	0.075	0.236	0.099	0.037	0.448	0.191	0.194	0.179	0.02	0.022	0.053	0.002	0.003	0.448	intronic	GRM8	.
7	126609729	rs1419476	A	G	0.45	0.65	0.44	0.43	0.13	0.32	0.48	0.52	0.31	0.3	0.33	0.12	0.11	0.18	-0.04	-0.04	0.52	0.035	0.079	0.003	0.07	0.246	0.099	0.042	0.448	0.191	0.2	0.179	0.02	0.025	0.047	0.001	0.002	0.448	intronic	GRM8	.
7	126626260	rs17684332	T	G	0.45	0.65	0.44	0.43	0.13	0.32	0.48	0.52	0.31	0.3	0.33	0.11	0.11	0.18	-0.04	-0.05	0.52	0.038	0.082	0.003	0.075	0.246	0.099	0.042	0.448	0.187	0.194	0.179	0.019	0.022	0.047	0	0.001	0.448	intronic	GRM8	.
7	126647666	rs17690706	G	A	0.45	0.65	0.44	0.42	0.13	0.32	0.47	0.52	0.31	0.29	0.33	0.12	0.1	0.19	-0.03	-0.04	0.52	0.038	0.079	0.003	0.082	0.236	0.099	0.037	0.448	0.191	0.185	0.179	0.02	0.018	0.053	0.002	0.002	0.448	intronic	GRM8	.
7	126649912	rs1815971	G	A	0.45	0.65	0.44	0.42	0.13	0.32	0.47	0.52	0.31	0.29	0.33	0.12	0.1	0.19	-0.03	-0.04	0.52	0.038	0.079	0.003	0.079	0.236	0.099	0.037	0.448	0.191	0.188	0.179	0.02	0.02	0.053	0.002	0.002	0.448	intronic	GRM8	.
7	126649928	rs1815972	C	T	0.45	0.65	0.44	0.42	0.13	0.32	0.47	0.52	0.31	0.29	0.33	0.11	0.1	0.19	-0.03	-0.04	0.52	0.039	0.081	0.003	0.079	0.236	0.099	0.037	0.448	0.188	0.188	0.179	0.019	0.02	0.053	0.002	0.002	0.448	intronic	GRM8	.
7	126640258	rs2027989	T	C	0.45	0.65	0.44	0.43	0.13	0.33	0.48	0.52	0.31	0.3	0.32	0.11	0.1	0.18	-0.04	-0.05	0.52	0.038	0.079	0.003	0.08	0.246	0.103	0.039	0.448	0.191	0.188	0.174	0.018	0.017	0.047	0.001	0	0.448	intronic	GRM8	.
7	126629828	rs2106314	A	G	0.45	0.66	0.44	0.43	0.13	0.32	0.48	0.52	0.3	0.3	0.34	0.11	0.11	0.18	-0.04	-0.04	0.52	0.04	0.087	0.003	0.08	0.239	0.093	0.042	0.448	0.181	0.188	0.187	0.019	0.022	0.052	0	0.001	0.448	intronic	GRM8	.
7	126641504	rs2237754	G	T	0.45	0.65	0.44	0.42	0.13	0.32	0.48	0.52	0.31	0.29	0.33	0.11	0.1	0.18	-0.04	-0.05	0.52	0.039	0.081	0.003	0.08	0.246	0.099	0.042	0.448	0.188	0.188	0.179	0.019	0.02	0.047	0	0	0.448	intronic	GRM8	.
7	126642546	rs28576500	G	A	0.45	0.65	0.43	0.43	0.13	0.32	0.46	0.52	0.3	0.3	0.33	0.11	0.11	0.19	-0.03	-0.03	0.52	0.039	0.084	0.003	0.077	0.231	0.099	0.034	0.448	0.184	0.191	0.179	0.017	0.021	0.057	0.002	0.003	0.448	intronic	GRM8	.
7	126644823	rs34618858	A	G	0.45	0.65	0.44	0.43	0.13	0.32	0.47	0.52	0.31	0.3	0.33	0.12	0.11	0.19	-0.03	-0.04	0.52	0.037	0.079	0.003	0.075	0.236	0.099	0.037	0.448	0.191	0.194	0.179	0.02	0.023	0.053	0.002	0.003	0.448	intronic	GRM8	.
7	126644087	rs3779540	T	C	0.45	0.65	0.44	0.42	0.13	0.32	0.47	0.52	0.31	0.29	0.33	0.11	0.1	0.19	-0.03	-0.05	0.52	0.039	0.082	0.003	0.082	0.236	0.099	0.037	0.448	0.187	0.185	0.179	0.019	0.018	0.053	0.002	0.001	0.448	intronic	GRM8	.
7	126630463	rs4562238	A	G	0.45	0.65	0.44	0.42	0.13	0.32	0.48	0.52	0.31	0.29	0.33	0.12	0.1	0.18	-0.04	-0.05	0.52	0.039	0.079	0.003	0.082	0.246	0.099	0.042	0.448	0.191	0.185	0.179	0.02	0.018	0.047	0.001	0	0.448	intronic	GRM8	.
7	126647082	rs58752001	C	T	0.45	0.65	0.44	0.43	0.13	0.32	0.47	0.52	0.31	0.3	0.33	0.12	0.1	0.19	-0.03	-0.04	0.52	0.037	0.079	0.003	0.077	0.236	0.099	0.037	0.448	0.191	0.191	0.179	0.02	0.021	0.053	0.002	0.002	0.448	intronic	GRM8	.
7	126630136	rs60739400	G	A	0.45	0.65	0.44	0.42	0.13	0.32	0.48	0.52	0.31	0.29	0.33	0.11	0.1	0.18	-0.04	-0.06	0.52	0.041	0.082	0.003	0.087	0.246	0.099	0.042	0.448	0.187	0.178	0.179	0.019	0.016	0.047	0	0.002	0.448	intronic	GRM8	.
7	126587772	rs62477866	A	T	0.45	0.65	0.44	0.43	0.13	0.32	0.48	0.52	0.31	0.3	0.33	0.12	0.12	0.18	-0.04	-0.04	0.52	0.037	0.081	0.003	0.072	0.246	0.094	0.045	0.448	0.188	0.197	0.185	0.021	0.027	0.047	0	0.002	0.448	intronic	GRM8	.
7	126626767	rs62477903	C	T	0.45	0.65	0.44	0.43	0.13	0.32	0.48	0.52	0.31	0.3	0.33	0.11	0.11	0.18	-0.04	-0.04	0.52	0.037	0.082	0.003	0.073	0.246	0.099	0.042	0.448	0.187	0.197	0.179	0.019	0.024	0.047	0	0.002	0.448	intronic	GRM8	.
7	126643188	rs62477909	G	A	0.45	0.65	0.44	0.42	0.13	0.32	0.47	0.52	0.31	0.29	0.33	0.12	0.1	0.19	-0.03	-0.04	0.52	0.038	0.079	0.004	0.08	0.236	0.099	0.037	0.448	0.191	0.187	0.179	0.02	0.019	0.053	0.002	0.002	0.448	intronic	GRM8	.
7	126647591	rs62477916	C	T	0.45	0.65	0.44	0.42	0.13	0.32	0.47	0.52	0.31	0.29	0.33	0.12	0.1	0.19	-0.03	-0.04	0.52	0.038	0.079	0.003	0.08	0.236	0.099	0.037	0.448	0.191	0.188	0.179	0.02	0.019	0.053	0.002	0.002	0.448	intronic	GRM8	.
7	126652229	rs7799835	G	A	0.45	0.65	0.44	0.43	0.13	0.32	0.47	0.52	0.31	0.3	0.33	0.12	0.11	0.19	-0.03	-0.04	0.52	0.037	0.079	0.003	0.077	0.236	0.099	0.037	0.448	0.191	0.191	0.179	0.02	0.021	0.053	0.002	0.002	0.448	intronic	GRM8	.
15	40313296	rs4277318	G	A	0.2	0.61	0.18	0.16	0.1	0.18	0.6	0.51	0.08	0.06	0.43	0	-0.02	0.02	-0.42	-0.44	0.51	0.213	0.316	0.001	0.365	0.425	0.022	0.303	0.447	0.024	0.009	0.313	0.004	0.002	0.006	0.306	0.352	0.447	intergenic	PLCB2;INAFM2	.
7	126653132	rs62477939	T	C	0.45	0.65	0.44	0.43	0.13	0.32	0.47	0.52	0.31	0.3	0.33	0.11	0.11	0.19	-0.03	-0.03	0.52	0.037	0.082	0.003	0.073	0.236	0.099	0.037	0.447	0.187	0.197	0.179	0.019	0.024	0.053	0.002	0.003	0.447	intronic	GRM8	.
7	80508987	rs1524600	A	G	0.88	0.84	0.89	0.87	0.38	0.9	0.85	0.46	0.51	0.49	-0.06	-0.01	-0.03	-0.01	0.04	0.02	0.51	0.002	0	0.003	0.001	0.374	0.445	0.006	0.355	0.434	0.432	0.007	0.002	0.001	0.006	0	0.001	0.445	intronic	GNAT3	.
12	10987845	rs6488334	T	C	0.8	0.71	0.82	0.78	0.3	0.74	0.77	0.42	0.52	0.48	-0.03	0.08	0.04	-0.06	0.05	0.01	0.52	0.009	0.028	0.002	0.007	0.367	0.322	0.002	0.297	0.445	0.388	0.005	0.018	0.002	0.002	0.005	0.003	0.445
7	141778508	rs2233998	T	C	0.44	0.73	0.41	0.41	0.19	0.45	0.68	0.54	0.22	0.22	0.28	-0.04	-0.04	0.04	-0.28	-0.27	0.54	0.084	0.164	0.004	0.165	0.397	0.141	0.103	0.444	0.105	0.103	0.132	0.002	0.001	0.002	0.133	0.135	0.444	exonic	TAS2R4	nonsynonymous
7	141764965	rs2270009	C	T	0.44	0.73	0.41	0.4	0.19	0.45	0.68	0.54	0.22	0.21	0.28	-0.04	-0.05	0.04	-0.28	-0.29	0.54	0.088	0.164	0.003	0.178	0.397	0.141	0.103	0.444	0.105	0.093	0.132	0.002	0.001	0.002	0.133	0.147	0.444	exonic	TAS2R3	synonymous
7	141760650	rs11520886	C	G	0.44	0.73	0.41	0.4	0.19	0.45	0.68	0.54	0.22	0.21	0.28	-0.04	-0.05	0.04	-0.28	-0.28	0.54	0.086	0.163	0.003	0.172	0.397	0.141	0.103	0.444	0.106	0.098	0.132	0.002	0	0.002	0.133	0.141	0.444	intergenic	SSBP1;TAS2R3	.
7	141762737	rs11763979	G	T	0.44	0.73	0.41	0.4	0.19	0.45	0.68	0.54	0.22	0.21	0.28	-0.04	-0.05	0.04	-0.28	-0.28	0.54	0.087	0.163	0.003	0.176	0.397	0.141	0.103	0.444	0.106	0.095	0.132	0.002	0.001	0.002	0.133	0.144	0.444	intergenic	SSBP1;TAS2R3	.
7	141762710	rs11771020	C	T	0.44	0.73	0.41	0.4	0.19	0.45	0.68	0.54	0.22	0.21	0.28	-0.04	-0.05	0.04	-0.28	-0.28	0.54	0.087	0.163	0.003	0.176	0.397	0.141	0.103	0.444	0.106	0.095	0.132	0.002	0.001	0.002	0.133	0.144	0.444	intergenic	SSBP1;TAS2R3	.
7	141762843	rs11771072	C	A	0.44	0.73	0.41	0.4	0.19	0.45	0.68	0.54	0.22	0.21	0.28	-0.04	-0.05	0.04	-0.27	-0.28	0.54	0.086	0.16	0.003	0.176	0.397	0.141	0.103	0.444	0.109	0.095	0.132	0.002	0.001	0.002	0.129	0.144	0.444	intergenic	SSBP1;TAS2R3	.
7	141761412	rs11773585	T	C	0.44	0.73	0.41	0.4	0.19	0.45	0.68	0.54	0.22	0.21	0.28	-0.04	-0.05	0.04	-0.28	-0.28	0.54	0.087	0.163	0.003	0.176	0.397	0.141	0.103	0.444	0.106	0.095	0.132	0.002	0.001	0.002	0.133	0.144	0.444	intergenic	SSBP1;TAS2R3	.
7	141756392	rs12540335	A	C	0.44	0.73	0.41	0.4	0.19	0.45	0.68	0.54	0.22	0.21	0.28	-0.04	-0.05	0.04	-0.28	-0.28	0.54	0.087	0.163	0.003	0.176	0.397	0.141	0.103	0.444	0.106	0.095	0.132	0.002	0.001	0.002	0.133	0.145	0.444	intergenic	SSBP1;TAS2R3	.
7	141760916	rs12703404	A	G	0.44	0.73	0.4	0.4	0.19	0.45	0.68	0.54	0.21	0.21	0.28	-0.04	-0.05	0.04	-0.28	-0.29	0.54	0.089	0.167	0.003	0.18	0.397	0.141	0.103	0.444	0.102	0.092	0.132	0.001	0.001	0.002	0.136	0.148	0.444	intergenic	SSBP1;TAS2R3	.
7	141755277	rs13226891	C	T	0.44	0.73	0.41	0.39	0.19	0.45	0.68	0.54	0.22	0.2	0.28	-0.04	-0.06	0.04	-0.28	-0.29	0.54	0.09	0.163	0.003	0.185	0.397	0.141	0.103	0.444	0.106	0.088	0.132	0.002	0.003	0.002	0.133	0.153	0.444	intergenic	SSBP1;TAS2R3	.
7	141758971	rs13235658	A	G	0.44	0.73	0.41	0.4	0.19	0.45	0.68	0.54	0.22	0.21	0.28	-0.04	-0.05	0.04	-0.28	-0.28	0.54	0.086	0.163	0.003	0.172	0.397	0.141	0.103	0.444	0.106	0.098	0.132	0.002	0	0.002	0.133	0.141	0.444	intergenic	SSBP1;TAS2R3	.
7	141756767	rs7790737	C	T	0.44	0.73	0.41	0.4	0.19	0.45	0.68	0.54	0.22	0.21	0.28	-0.04	-0.04	0.04	-0.28	-0.28	0.54	0.086	0.166	0.003	0.172	0.397	0.141	0.103	0.444	0.103	0.098	0.132	0.001	0	0.002	0.136	0.141	0.444	intergenic	SSBP1;TAS2R3	.
7	141755698	rs9648782	G	A	0.44	0.73	0.41	0.4	0.19	0.45	0.68	0.54	0.22	0.21	0.28	-0.04	-0.05	0.04	-0.27	-0.28	0.54	0.086	0.16	0.003	0.176	0.397	0.141	0.103	0.444	0.109	0.095	0.132	0.002	0.001	0.002	0.129	0.144	0.444	intergenic	SSBP1;TAS2R3	.
7	141760216	rs9791795	C	T	0.44	0.73	0.41	0.4	0.19	0.45	0.68	0.54	0.22	0.21	0.28	-0.04	-0.05	0.04	-0.28	-0.29	0.54	0.088	0.166	0.003	0.178	0.397	0.141	0.103	0.444	0.103	0.093	0.132	0.001	0.001	0.002	0.136	0.147	0.444	intergenic	SSBP1;TAS2R3	.
7	141760290	rs9791994	A	G	0.44	0.73	0.41	0.39	0.19	0.45	0.68	0.54	0.22	0.2	0.28	-0.04	-0.06	0.04	-0.28	-0.29	0.54	0.09	0.166	0.003	0.182	0.397	0.141	0.103	0.444	0.103	0.09	0.132	0.001	0.002	0.002	0.136	0.15	0.444	intergenic	SSBP1;TAS2R3	.
7	141760419	rs9791995	A	G	0.44	0.73	0.41	0.41	0.19	0.45	0.68	0.54	0.22	0.22	0.28	-0.04	-0.04	0.04	-0.28	-0.28	0.54	0.085	0.163	0.003	0.17	0.397	0.141	0.103	0.444	0.106	0.1	0.132	0.002	0	0.002	0.133	0.139	0.444	intergenic	SSBP1;TAS2R3	.
7	141770802	rs182547379	T	G	0.44	0.73	0.4	0.4	0.19	0.45	0.68	0.54	0.21	0.21	0.28	-0.04	-0.05	0.04	-0.28	-0.28	0.54	0.088	0.167	0.003	0.176	0	0	0	0.444	0.102	0.095	0.132	0.001	0.001	0.002	0.136	0.145	0.444	intergenic	TAS2R3;TAS2R4	.
7	141772512	rs201277384	G	T	0.44	0.73	0.41	0.4	0.19	0.45	0.67	0.54	0.22	0.21	0.28	-0.04	-0.05	0.06	-0.26	-0.27	0.54	0.087	0.16	0.003	0.179	0.379	0.141	0.09	0.444	0.108	0.092	0.132	0.002	0.001	0.001	0.116	0.134	0.444	intergenic	TAS2R3;TAS2R4	.
7	141769879	rs2023998	G	A	0.44	0.73	0.41	0.4	0.19	0.45	0.68	0.54	0.22	0.21	0.28	-0.04	-0.05	0.04	-0.28	-0.28	0.54	0.087	0.164	0.003	0.176	0.397	0.141	0.103	0.444	0.105	0.095	0.132	0.002	0.001	0.002	0.133	0.144	0.444	intergenic	TAS2R3;TAS2R4	.
7	141777387	rs33920115	G	A	0.44	0.73	0.41	0.4	0.19	0.45	0.68	0.54	0.22	0.21	0.28	-0.04	-0.05	0.04	-0.28	-0.28	0.54	0.086	0.163	0.003	0.172	0.397	0.141	0.103	0.444	0.106	0.098	0.132	0.002	0	0.002	0.133	0.141	0.444	intergenic	TAS2R3;TAS2R4	.
7	141771345	rs62477694	T	A	0.44	0.73	0.41	0.4	0.19	0.45	0.68	0.54	0.22	0.21	0.28	-0.04	-0.05	0.04	-0.28	-0.28	0.54	0.086	0.163	0.003	0.172	0.397	0.141	0.103	0.444	0.106	0.098	0.132	0.002	0	0.002	0.133	0.141	0.444	intergenic	TAS2R3;TAS2R4	.
7	141775796	rs62477701	A	G	0.44	0.73	0.41	0.4	0.19	0.45	0.68	0.54	0.22	0.21	0.28	-0.04	-0.05	0.04	-0.28	-0.28	0.54	0.087	0.163	0.003	0.176	0.397	0.141	0.103	0.444	0.106	0.095	0.132	0.002	0.001	0.002	0.133	0.145	0.444	intergenic	TAS2R3;TAS2R4	.
7	141770649	rs75664058	A	G	0.56	0.73	0.56	0.5	0.19	0.45	0.68	0.54	0.37	0.31	0.28	0.11	0.05	0.04	-0.13	-0.19	0.54	0.036	0.039	0.008	0.09	0.397	0.141	0.103	0.444	0.258	0.18	0.132	0.025	0.001	0.002	0.022	0.066	0.444	intergenic	TAS2R3;TAS2R4	.
7	141768169	rs917197	A	G	0.44	0.73	0.41	0.4	0.19	0.45	0.68	0.54	0.22	0.21	0.28	-0.04	-0.05	0.04	-0.28	-0.28	0.54	0.088	0.164	0.003	0.177	0.397	0.141	0.103	0.444	0.105	0.094	0.132	0.002	0.001	0.002	0.133	0.146	0.444	intergenic	TAS2R3;TAS2R4	.
7	141767942	rs974007	A	T	0.44	0.73	0.41	0.4	0.19	0.45	0.68	0.54	0.22	0.21	0.28	-0.04	-0.05	0.04	-0.28	-0.28	0.54	0.086	0.164	0.003	0.172	0.397	0.141	0.103	0.444	0.105	0.098	0.132	0.002	0	0.002	0.133	0.141	0.444	intergenic	TAS2R3;TAS2R4	.
7	141780772	rs2190244	A	G	0.44	0.73	0.41	0.39	0.19	0.45	0.68	0.54	0.22	0.2	0.28	-0.04	-0.06	0.04	-0.28	-0.29	0.54	0.089	0.163	0.003	0.183	0.397	0.141	0.103	0.444	0.106	0.09	0.132	0.002	0.002	0.002	0.133	0.151	0.444	intergenic	TAS2R4;TAS2R5	.
7	141784685	rs2366746	C	T	0.44	0.73	0.4	0.4	0.19	0.45	0.68	0.54	0.21	0.21	0.28	-0.04	-0.05	0.04	-0.28	-0.28	0.54	0.089	0.167	0.003	0.18	0.397	0.141	0.103	0.444	0.103	0.092	0.132	0.001	0.001	0.002	0.136	0.148	0.444	intergenic	TAS2R4;TAS2R5	.
7	141785572	rs62477707	C	T	0.44	0.73	0.41	0.39	0.19	0.45	0.68	0.54	0.22	0.2	0.28	-0.04	-0.06	0.04	-0.28	-0.29	0.54	0.091	0.166	0.003	0.185	0.397	0.141	0.103	0.444	0.103	0.088	0.132	0.001	0.003	0.002	0.136	0.154	0.444	intergenic	TAS2R4;TAS2R5	.
7	141783034	rs7459036	G	A	0.44	0.73	0.41	0.4	0.19	0.45	0.68	0.54	0.22	0.21	0.28	-0.04	-0.05	0.04	-0.28	-0.28	0.54	0.086	0.164	0.003	0.172	0	0	0	0.444	0.105	0.098	0.132	0.002	0	0.002	0.133	0.141	0.444	intergenic	TAS2R4;TAS2R5	.
19	33800090	rs287104	A	G	0.45	0.68	0.41	0.42	0.16	0.37	0.67	0.52	0.25	0.26	0.31	0.04	0.05	0.02	-0.26	-0.24	0.52	0.066	0.139	0.003	0.124	0.413	0.105	0.153	0.444	0.127	0.14	0.169	0.002	0.001	0.005	0.124	0.109	0.444	intronic	KCTD15	.
5	1411297	rs6347	C	T	0.86	0.89	0.89	0.84	0.38	0.74	0.88	0.5	0.51	0.46	0.15	0.16	0.1	0.01	0.02	-0.04	0.51	0.003	0.006	0.005	0.006	0.412	0.221	0.058	0.417	0.442	0.373	0.069	0.071	0.031	0.005	0.004	0.002	0.442	exonic	SLC6A3	synonymous
5	1435857	rs4975547	A	G	0.93	1	0.87	0.95	0.47	0.75	0.5	0.53	0.4	0.48	0.25	0.12	0.2	0.5	0.38	0.45	0.53	0.054	0.09	0.044	0.022	0.003	0.149	0.128	0.418	0.281	0.442	0.173	0.031	0.147	0.398	0.258	0.421	0.442	intronic	SLC6A3	.
17	33502618	rs8079480	A	T	0.5	0.66	0.52	0.46	0.15	0.38	0.64	0.51	0.37	0.31	0.28	0.14	0.08	0.02	-0.11	-0.18	0.51	0.029	0.03	0.007	0.072	0.399	0.126	0.12	0.441	0.269	0.196	0.143	0.042	0.01	0.004	0.019	0.055	0.441	intronic	ASIC2	.
6	34079267	rs12529131	C	T	0.79	0.7	0.75	0.87	0.35	0.86	0.71	0.35	0.39	0.52	-0.17	-0.12	0	-0.01	0.04	0.16	0.52	0.041	0.005	0.038	0.092	0.223	0.425	0.064	0.192	0.272	0.441	0.088	0.037	0.004	0.004	0.001	0.067	0.441	intronic	GRM4	.
3	6919339	rs13316534	C	T	0.62	0.58	0.63	0.64	0.12	0.53	0.45	0.46	0.51	0.53	0.05	0.1	0.12	0.12	0.17	0.19	0.53	0.001	0.001	0.002	0.007	0.242	0.324	0.007	0.39	0.422	0.441	0.001	0.018	0.027	0.022	0.057	0.071	0.441	intronic	GRM7	.
7	126651629	rs11970993	A	G	0.45	0.64	0.44	0.43	0.13	0.32	0.47	0.51	0.31	0.3	0.32	0.12	0.1	0.18	-0.03	-0.04	0.51	0.035	0.074	0.003	0.074	0.236	0.099	0.037	0.44	0.191	0.188	0.172	0.02	0.02	0.049	0.002	0.002	0.44	intronic	GRM8	.
7	126650541	rs11976897	C	A	0.45	0.65	0.44	0.43	0.13	0.32	0.47	0.52	0.31	0.3	0.33	0.12	0.11	0.19	-0.03	-0.04	0.52	0.037	0.079	0.003	0.075	0.229	0.093	0.037	0.44	0.185	0.188	0.179	0.02	0.022	0.053	0.002	0.003	0.44	intronic	GRM8	.
7	126645389	rs1894732	C	T	0.45	0.64	0.44	0.43	0.13	0.32	0.47	0.51	0.31	0.3	0.32	0.12	0.11	0.18	-0.03	-0.04	0.51	0.034	0.074	0.003	0.07	0.236	0.099	0.037	0.44	0.191	0.194	0.172	0.02	0.022	0.049	0.002	0.003	0.44	intronic	GRM8	.
7	126630683	rs2188296	T	C	0.45	0.64	0.43	0.43	0.13	0.32	0.48	0.51	0.3	0.3	0.32	0.11	0.11	0.17	-0.04	-0.04	0.51	0.035	0.079	0.003	0.068	0.246	0.099	0.042	0.44	0.184	0.197	0.172	0.017	0.024	0.043	0.001	0.002	0.44	intronic	GRM8	.
7	126630684	rs2188297	G	A	0.45	0.64	0.43	0.43	0.13	0.32	0.48	0.51	0.3	0.3	0.32	0.11	0.11	0.17	-0.04	-0.04	0.51	0.035	0.079	0.003	0.068	0.246	0.099	0.042	0.44	0.184	0.197	0.172	0.017	0.024	0.043	0.001	0.002	0.44	intronic	GRM8	.
7	126638917	rs2237749	A	C	0.45	0.66	0.44	0.43	0.14	0.32	0.48	0.52	0.3	0.29	0.34	0.11	0.11	0.18	-0.04	-0.04	0.52	0.04	0.087	0.003	0.08	0.233	0.088	0.042	0.44	0.176	0.183	0.187	0.019	0.023	0.052	0	0.001	0.44	intronic	GRM8	.
7	126647001	rs56695631	T	C	0.45	0.65	0.44	0.42	0.13	0.32	0.47	0.52	0.31	0.29	0.33	0.12	0.1	0.19	-0.03	-0.04	0.52	0.038	0.079	0.003	0.08	0.229	0.093	0.037	0.44	0.185	0.182	0.179	0.02	0.02	0.053	0.002	0.002	0.44	intronic	GRM8	.
7	126614240	rs62477891	C	T	0.45	0.64	0.44	0.43	0.13	0.32	0.48	0.51	0.31	0.3	0.32	0.12	0.1	0.16	-0.04	-0.05	0.51	0.035	0.074	0.003	0.074	0.251	0.099	0.045	0.44	0.191	0.188	0.172	0.02	0.02	0.04	0	0.001	0.44	intronic	GRM8	.
7	141755895	rs35116446	C	T	0.44	0.73	0.4	0.4	0.2	0.41	0.61	0.54	0.2	0.2	0.33	-0.01	-0.01	0.12	-0.21	-0.21	0.54	0.094	0.177	0.003	0.186	0.299	0.096	0.076	0.439	0.091	0.084	0.179	0.004	0.004	0.024	0.077	0.084	0.439	intergenic	SSBP1;TAS2R3	.
7	141757989	rs9791593	G	T	0.43	0.73	0.38	0.4	0.2	0.45	0.72	0.54	0.18	0.2	0.29	-0.07	-0.05	0.02	-0.34	-0.32	0.54	0.099	0.196	0.003	0.186	0.426	0.131	0.135	0.439	0.078	0.084	0.139	0.003	0.001	0.005	0.192	0.182	0.439	intergenic	SSBP1;TAS2R3	.
7	141776150	rs62477702	C	G	0.44	0.73	0.41	0.39	0.2	0.45	0.72	0.54	0.21	0.19	0.29	-0.04	-0.06	0.02	-0.31	-0.32	0.54	0.094	0.171	0.003	0.193	0.426	0.131	0.135	0.439	0.096	0.079	0.139	0.002	0.003	0.005	0.167	0.189	0.439	intergenic	TAS2R3;TAS2R4	.
3	7322200	rs6443104	A	G	0.53	0.52	0.53	0.57	0.06	0.39	0.47	0.45	0.47	0.5	0.12	0.14	0.18	0.05	0.06	0.1	0.5	0.002	0.005	0.002	0.001	0.342	0.267	0.006	0.439	0.401	0.426	0.03	0.038	0.056	0.002	0.007	0.017	0.439	intronic	GRM7	.
16	23352760	rs63982	A	C	0.48	0.65	0.52	0.33	0.14	0.18	0.67	0.51	0.38	0.19	0.47	0.34	0.15	-0.01	-0.15	-0.33	0.51	0.087	0.028	0.065	0.179	0.439	0.001	0.382	0.432	0.259	0.085	0.37	0.209	0.051	0.006	0.04	0.197	0.439	intronic	SCNN1B	.
7	22717722	rs6963866	T	C	0.6	0.64	0.69	0.53	0.19	0.53	0.72	0.45	0.5	0.34	0.11	0.16	0	-0.08	-0.03	-0.19	0.5	0.029	0.001	0.045	0.021	0.438	0.216	0.072	0.336	0.369	0.195	0.015	0.038	0.004	0.014	0.002	0.08	0.438	intergenic	MGC87042(dist=217440),IL6(dist=9425)	.
17	33592307	rs6505361	A	C	0.74	0.61	0.74	0.77	0.24	0.66	0.6	0.38	0.51	0.54	-0.04	0.09	0.12	0.01	0.14	0.17	0.54	0.024	0.037	0.001	0.058	0.239	0.301	0.001	0.247	0.401	0.438	0	0.012	0.026	0.006	0.039	0.06	0.438	intronic	ASIC2	.
7	126696708	rs6963108	G	C	0.47	0.73	0.44	0.43	0.2	0.37	0.49	0.54	0.24	0.23	0.36	0.07	0.06	0.25	-0.04	-0.05	0.54	0.073	0.153	0.003	0.139	0.164	0.068	0.02	0.438	0.111	0.123	0.215	0.002	0.006	0.106	0.001	0.001	0.438	intronic	GRM8	.
7	126693529	rs7780253	T	A	0.46	0.73	0.44	0.43	0.2	0.36	0.49	0.54	0.24	0.23	0.38	0.08	0.08	0.25	-0.04	-0.05	0.54	0.074	0.154	0.003	0.142	0.164	0.057	0.027	0.438	0.111	0.12	0.232	0.006	0.01	0.106	0.002	0.001	0.438	intronic	GRM8	.
7	141772778	rs11766136	T	A	0.44	0.72	0.41	0.39	0.19	0.45	0.68	0.53	0.22	0.2	0.27	-0.04	-0.06	0.04	-0.28	-0.3	0.53	0.089	0.156	0.002	0.186	0.397	0.141	0.103	0.435	0.106	0.082	0.125	0.002	0.004	0.003	0.133	0.161	0.435	intergenic	TAS2R3;TAS2R4	.
7	141773421	rs36198493	A	C	0.44	0.72	0.4	0.4	0.19	0.45	0.68	0.53	0.21	0.21	0.27	-0.04	-0.05	0.04	-0.28	-0.28	0.53	0.085	0.16	0.003	0.172	0	0	0	0.435	0.102	0.092	0.125	0.001	0.001	0.003	0.136	0.148	0.435	intergenic	TAS2R3;TAS2R4	.
7	141784294	rs2190245	G	T	0.44	0.72	0.41	0.4	0.19	0.45	0.68	0.53	0.22	0.21	0.27	-0.04	-0.05	0.04	-0.28	-0.29	0.53	0.084	0.157	0.003	0.172	0	0	0	0.435	0.105	0.093	0.125	0.002	0.001	0.003	0.133	0.147	0.435	intergenic	TAS2R4;TAS2R5	.
7	141780413	rs2214838	A	G	0.44	0.72	0.41	0.4	0.19	0.45	0.68	0.53	0.22	0.21	0.27	-0.04	-0.05	0.04	-0.28	-0.28	0.53	0.084	0.157	0.003	0.172	0.397	0.141	0.103	0.435	0.105	0.092	0.125	0.002	0.001	0.003	0.133	0.148	0.435	intergenic	TAS2R4;TAS2R5	.
21	35044543	rs7280028	C	T	0.89	0.95	0.92	0.88	0.45	0.76	0.88	0.51	0.48	0.43	0.2	0.17	0.12	0.07	0.04	-0.01	0.51	0.013	0.006	0.007	0.03	0.345	0.176	0.048	0.435	0.429	0.358	0.135	0.099	0.048	0.029	0.004	0.004	0.435	intronic	RUNX1	.
7	126600797	rs12538710	C	T	0.46	0.67	0.44	0.43	0.15	0.32	0.48	0.52	0.29	0.28	0.36	0.12	0.11	0.2	-0.04	-0.05	0.52	0.045	0.096	0.003	0.089	0.213	0.07	0.045	0.434	0.162	0.168	0.207	0.023	0.026	0.062	0.001	0.002	0.434	intronic	GRM8	.
7	126604564	rs2106308	C	T	0.46	0.67	0.44	0.44	0.15	0.32	0.48	0.52	0.28	0.29	0.36	0.12	0.12	0.2	-0.04	-0.03	0.52	0.045	0.099	0.003	0.086	0.213	0.07	0.045	0.434	0.159	0.171	0.207	0.021	0.028	0.062	0	0.002	0.434	intronic	GRM8	.
7	126600392	rs975266	C	T	0.45	0.67	0.44	0.43	0.15	0.32	0.48	0.52	0.28	0.28	0.36	0.12	0.11	0.2	-0.04	-0.05	0.52	0.046	0.099	0.003	0.091	0.213	0.07	0.045	0.434	0.159	0.165	0.207	0.021	0.025	0.062	0	0.001	0.434	intronic	GRM8	.
7	45655732	rs2461130	A	G	0.63	0.39	0.61	0.67	0.13	0.56	0.26	0.26	0.48	0.53	-0.17	0.05	0.11	0.14	0.35	0.41	0.53	0.051	0.073	0.002	0.118	0.042	0.334	0.17	0.18	0.375	0.433	0.04	0.001	0.017	0.046	0.218	0.276	0.433	intronic	ADCY1	.
17	3593104	rs12602895	G	C	#NAME?	#NAME?	#NAME?	#NAME?	0.44	0	0	#NAME?	#NAME?	#NAME?	#NAME?	#NAME?	#NAME?	#NAME?	#NAME?	#NAME?	#NAME?	0	0	0	0	0.433	0.428	0	0	0	0	0	0	0	0	0	0	0.433	intronic	TRPV1	.
15	40279915	rs7169803	A	G	0.29	0.76	0.25	0.29	0.53	0.23	0.7	0.23	-0.28	-0.24	0.53	0.02	0.07	0.05	-0.45	-0.41	0.53	0.231	0.411	0.001	0.355	0.056	0.175	0.368	0.093	0.162	0.119	0.432	0.003	0.004	0	0.351	0.298	0.432	intergenic	PAK6(dist=2428),LOC100131244(dist=1529)	.
1	167913148	rs203782	A	G	0.76	0.73	0.81	0.75	0.3	0.69	0.79	0.43	0.51	0.45	0.04	0.12	0.05	-0.06	0.02	-0.04	0.51	0.01	0.023	0.013	0.004	0.392	0.267	0.021	0.297	0.432	0.327	0.004	0.038	0.001	0.009	0.002	0.003	0.432	intronic	ADCY10	.
6	34038743	rs2499676	T	G	0.7	0.59	0.66	0.77	0.25	0.76	0.58	0.34	0.41	0.52	-0.17	-0.1	0.02	0.01	0.08	0.19	0.52	0.042	0.009	0.034	0.092	0.201	0.407	0.062	0.192	0.273	0.432	0.073	0.023	0.003	0.006	0.006	0.081	0.432	intronic	GRM4	.
3	6919115	rs6783690	C	T	0.62	0.58	0.63	0.64	0.12	0.53	0.45	0.46	0.52	0.52	0.05	0.11	0.11	0.12	0.18	0.19	0.52	0	0.003	0.003	0.005	0.242	0.324	0.007	0.39	0.429	0.432	0.001	0.02	0.023	0.022	0.061	0.066	0.432	intronic	GRM7	.
7	126647854	rs1361989	T	C	0.45	0.64	0.44	0.42	0.13	0.32	0.47	0.51	0.31	0.29	0.31	0.12	0.09	0.17	-0.03	-0.05	0.51	0.034	0.068	0.003	0.073	0.236	0.099	0.037	0.431	0.191	0.182	0.165	0.02	0.017	0.044	0.002	0.001	0.431	intronic	GRM8	.
14	72371226	rs10149207	A	G	0.48	0.18	0.55	0.49	0.41	0.26	0.05	-0.23	0.14	0.08	-0.08	0.29	0.23	0.13	0.5	0.44	0.5	0.105	0.232	0.004	0.169	0.294	0.041	0.15	0.097	0.039	0.011	0.009	0.156	0.101	0.086	0.43	0.359	0.43	intronic	RGS6	.
15	40285207	rs2412505	T	C	0.44	0.79	0.41	0.43	0.3	0.24	0.76	0.49	0.12	0.14	0.55	0.17	0.19	0.03	-0.35	-0.33	0.55	0.116	0.234	0.003	0.211	0.354	0.002	0.423	0.357	0.017	0.027	0.429	0.048	0.061	0.006	0.233	0.21	0.429	intergenic	ANKRD63;PLCB2	.
6	34079519	rs2046822	T	C	0.64	0.39	0.64	0.72	0.19	0.7	0.5	0.21	0.46	0.53	-0.3	-0.05	0.02	-0.1	0.15	0.22	0.53	0.087	0.119	0.007	0.193	0.19	0.419	0.076	0.094	0.346	0.429	0.172	0.002	0.004	0.017	0.04	0.091	0.429	intronic	GRM4	.
6	34038707	rs2499675	C	T	0.69	0.59	0.65	0.77	0.25	0.76	0.58	0.34	0.4	0.52	-0.17	-0.11	0.01	0.01	0.07	0.19	0.52	0.041	0.006	0.036	0.089	0.201	0.407	0.062	0.192	0.265	0.428	0.073	0.026	0.003	0.006	0.004	0.078	0.428	intronic	GRM4	.
15	40311440	rs4923862	C	G	0.32	0.74	0.3	0.25	0.46	0.21	0.68	0.28	-0.16	-0.21	0.53	0.09	0.04	0.06	-0.39	-0.43	0.53	0.205	0.308	0.004	0.381	0.095	0.122	0.364	0.137	0.048	0.092	0.427	0.017	0.001	0	0.253	0.323	0.427	intergenic	PLCB2;INAFM2	.
7	141759653	rs13224264	G	A	0.44	0.71	0.41	0.4	0.19	0.45	0.68	0.52	0.22	0.21	0.26	-0.04	-0.05	0.03	-0.28	-0.29	0.52	0.081	0.152	0.003	0.165	0.397	0.141	0.103	0.427	0.103	0.092	0.118	0.001	0.001	0.004	0.136	0.148	0.427	intergenic	SSBP1;TAS2R3	.
7	141756881	rs7790888	C	T	0.44	0.72	0.41	0.4	0.2	0.45	0.72	0.52	0.21	0.2	0.27	-0.04	-0.05	0	-0.31	-0.31	0.52	0.083	0.159	0.003	0.165	0.426	0.131	0.135	0.422	0.094	0.089	0.125	0.001	0	0.005	0.17	0.176	0.426	intergenic	SSBP1;TAS2R3	.
17	33204599	rs319788	T	C	0.4	0.64	0.41	0.37	0.14	0.3	0.55	0.5	0.26	0.23	0.34	0.1	0.07	0.09	-0.15	-0.18	0.5	0.058	0.081	0.005	0.136	0.31	0.067	0.115	0.425	0.17	0.113	0.202	0.029	0.005	0.009	0.027	0.064	0.425	intronic	ASIC2	.
7	126634768	rs2299482	C	T	0.45	0.66	0.44	0.43	0.15	0.32	0.48	0.51	0.29	0.28	0.34	0.11	0.11	0.18	-0.04	-0.05	0.51	0.04	0.087	0.003	0.08	0.22	0.078	0.042	0.425	0.164	0.171	0.187	0.019	0.022	0.052	0	0.001	0.425	intronic	GRM8	.
6	88170320	rs9353527	G	A	0.63	0.89	0.6	0.64	0.36	0.67	0.76	0.53	0.24	0.28	0.23	-0.06	-0.02	0.14	-0.16	-0.11	0.53	0.069	0.163	0.002	0.12	0.271	0.167	0.016	0.424	0.104	0.149	0.112	0.006	0.003	0.043	0.051	0.024	0.424	intergenic	CNR1;LOC101928936	.
6	34038845	rs9394186	A	G	0.7	0.6	0.66	0.77	0.25	0.76	0.58	0.35	0.41	0.52	-0.16	-0.1	0.01	0.02	0.08	0.19	0.52	0.036	0.006	0.03	0.08	0.201	0.407	0.062	0.199	0.273	0.424	0.067	0.023	0.004	0.006	0.006	0.075	0.424	intronic	GRM4	.
15	40280913	rs11633123	G	A	0.29	0.75	0.25	0.3	0.54	0.23	0.69	0.21	-0.3	-0.24	0.52	0.02	0.07	0.06	-0.45	-0.39	0.52	0.224	0.407	0.003	0.341	0.043	0.184	0.356	0.08	0.175	0.123	0.423	0.004	0.006	0.001	0.344	0.281	0.423	downstream	LOC100131244	.
17	33665401	rs4795825	G	A	0.76	0.82	0.75	0.75	0.31	0.8	0.83	0.5	0.43	0.43	0.02	-0.05	-0.05	-0.01	-0.08	-0.08	0.5	0.002	0.003	0.002	0.01	0.423	0.378	0.002	0.387	0.328	0.303	0.005	0	0.006	0.005	0.011	0.02	0.423	intronic	ASIC2	.
6	34079063	rs9394187	A	G	0.64	0.39	0.64	0.71	0.19	0.69	0.5	0.21	0.46	0.53	-0.29	-0.04	0.02	-0.1	0.15	0.22	0.53	0.085	0.119	0.006	0.187	0.19	0.406	0.068	0.094	0.346	0.423	0.162	0	0.003	0.017	0.04	0.087	0.423	intronic	GRM4	.
3	7190173	rs13326811	T	A	0.71	0.8	0.72	0.7	0.26	0.67	0.75	0.54	0.46	0.44	0.12	0.05	0.03	0.04	-0.03	-0.05	0.54	0.004	0.005	0.002	0.014	0.388	0.289	0.011	0.423	0.346	0.311	0.023	0.001	0.004	0.003	0.001	0.005	0.423	intronic	GRM7	.
6	34038031	rs2499672	A	C	0.69	0.58	0.66	0.77	0.25	0.76	0.58	0.33	0.41	0.52	-0.17	-0.1	0.01	0.01	0.08	0.19	0.52	0.04	0.01	0.031	0.09	0.196	0.407	0.066	0.185	0.269	0.422	0.078	0.024	0.004	0.006	0.006	0.077	0.422	intronic	GRM4	.
3	7032442	rs9819573	A	C	0.42	0.68	0.36	0.4	0.17	0.51	0.54	0.51	0.19	0.23	0.18	-0.14	-0.1	0.14	-0.18	-0.14	0.51	0.082	0.182	0.003	0.129	0.26	0.219	0.002	0.421	0.077	0.119	0.052	0.041	0.015	0.03	0.066	0.032	0.421	intronic	GRM7	.
7	22724226	rs2002792	G	C	0.64	0.63	0.71	0.56	0.19	0.54	0.7	0.44	0.52	0.38	0.09	0.17	0.03	-0.07	0.01	-0.14	0.52	0.024	0.006	0.04	0.006	0.42	0.233	0.05	0.335	0.405	0.237	0.008	0.047	0.004	0.008	0.004	0.043	0.42	intergenic	MGC87042(dist=223944),IL6(dist=2921)	.
17	33592130	rs8081813	G	A	0.74	0.61	0.75	0.77	0.25	0.66	0.6	0.36	0.5	0.52	-0.04	0.09	0.11	0.01	0.14	0.17	0.52	0.024	0.039	0.002	0.057	0.222	0.283	0.001	0.229	0.389	0.419	0	0.014	0.025	0.006	0.041	0.058	0.419	intronic	ASIC2	.
9	6557414	rs7021790	T	G	0.35	0.68	0.3	0.32	0.22	0.17	0.63	0.46	0.08	0.1	0.51	0.12	0.14	0.06	-0.33	-0.31	0.51	0.129	0.244	0.003	0.227	0.29	0.003	0.351	0.353	0.014	0.02	0.419	0.04	0.048	0	0.19	0.175	0.419	intronic	GLDC	.
9	6557409	rs7041988	C	T	0.33	0.68	0.27	0.31	0.25	0.17	0.63	0.43	0.02	0.06	0.51	0.1	0.14	0.06	-0.35	-0.32	0.51	0.14	0.27	0.002	0.234	0.243	0.016	0.351	0.302	0.002	0.003	0.419	0.028	0.044	0	0.214	0.182	0.419	intronic	GLDC	.
17	34045299	rs7503428	C	G	0.65	0.75	0.67	0.63	0.25	0.68	0.62	0.5	0.42	0.38	0.07	0	-0.05	0.13	0.06	0.01	0.5	0.015	0.021	0	0.041	0.238	0.307	0.003	0.418	0.285	0.241	0.014	0.004	0.002	0.045	0	0.004	0.418	intronic	ASIC2	.
6	34037292	rs2451383	G	A	0.69	0.58	0.66	0.77	0.25	0.76	0.57	0.33	0.4	0.51	-0.17	-0.1	0.01	0.01	0.08	0.2	0.51	0.04	0.006	0.034	0.086	0.186	0.401	0.069	0.187	0.26	0.418	0.072	0.026	0.004	0.006	0.006	0.082	0.418	intronic	GRM4	.
7	126622095	rs12538796	T	C	0.45	0.66	0.44	0.43	0.15	0.32	0.48	0.51	0.29	0.28	0.34	0.12	0.11	0.18	-0.04	-0.05	0.51	0.04	0.084	0.003	0.08	0.213	0.074	0.042	0.418	0.162	0.165	0.187	0.02	0.022	0.052	0.001	0.001	0.418	intronic	GRM8	.
7	126625688	rs12540159	A	G	0.45	0.66	0.44	0.42	0.15	0.32	0.48	0.51	0.28	0.27	0.34	0.11	0.1	0.18	-0.04	-0.05	0.51	0.042	0.087	0.003	0.085	0.213	0.074	0.042	0.418	0.159	0.159	0.187	0.019	0.019	0.052	0	0	0.418	intronic	GRM8	.
7	126612884	rs1419478	G	A	0.45	0.66	0.44	0.43	0.15	0.32	0.48	0.51	0.29	0.28	0.34	0.12	0.11	0.18	-0.04	-0.04	0.51	0.039	0.084	0.003	0.078	0.213	0.074	0.042	0.418	0.162	0.168	0.187	0.02	0.024	0.052	0.001	0.002	0.418	intronic	GRM8	.
7	126612958	rs1419479	T	G	0.45	0.66	0.44	0.43	0.15	0.32	0.48	0.51	0.29	0.28	0.34	0.12	0.11	0.18	-0.04	-0.04	0.51	0.039	0.084	0.003	0.078	0.213	0.074	0.042	0.418	0.162	0.168	0.187	0.02	0.024	0.052	0.001	0.002	0.418	intronic	GRM8	.
7	126620772	rs1419481	T	C	0.45	0.66	0.44	0.43	0.15	0.32	0.48	0.51	0.29	0.28	0.34	0.12	0.11	0.18	-0.04	-0.04	0.51	0.039	0.084	0.003	0.08	0.213	0.074	0.042	0.418	0.162	0.166	0.187	0.02	0.023	0.052	0.001	0.001	0.418	intronic	GRM8	.
7	126624771	rs1419486	A	T	0.45	0.66	0.44	0.43	0.15	0.32	0.48	0.51	0.29	0.28	0.34	0.12	0.11	0.18	-0.04	-0.04	0.51	0.039	0.084	0.003	0.08	0.213	0.074	0.042	0.418	0.162	0.166	0.187	0.02	0.023	0.052	0.001	0.001	0.418	intronic	GRM8	.
7	126618372	rs200509850	T	C	0.45	0.66	0.44	0.43	0.15	0.32	0.48	0.51	0.29	0.28	0.34	0.12	0.11	0.18	-0.04	-0.05	0.51	0.04	0.084	0.003	0.082	0.213	0.074	0.042	0.418	0.162	0.162	0.187	0.02	0.021	0.052	0.001	0.001	0.418	intronic	GRM8	.
7	126605331	rs2106310	G	A	0.46	0.66	0.45	0.43	0.15	0.32	0.48	0.51	0.3	0.28	0.34	0.13	0.11	0.18	-0.02	-0.05	0.51	0.037	0.077	0.003	0.08	0.213	0.07	0.045	0.418	0.172	0.165	0.192	0.028	0.025	0.052	0.002	0.001	0.418	intronic	GRM8	.
7	126621799	rs2299480	C	T	0.45	0.66	0.44	0.43	0.15	0.32	0.48	0.51	0.28	0.28	0.34	0.11	0.11	0.18	-0.04	-0.05	0.51	0.04	0.087	0.003	0.08	0.213	0.074	0.042	0.418	0.159	0.165	0.187	0.019	0.022	0.052	0	0.001	0.418	intronic	GRM8	.
7	126617788	rs28821311	G	A	0.45	0.66	0.44	0.43	0.15	0.32	0.48	0.51	0.29	0.27	0.34	0.12	0.1	0.18	-0.04	-0.05	0.51	0.04	0.084	0.003	0.082	0.213	0.074	0.042	0.418	0.162	0.162	0.187	0.02	0.021	0.052	0.001	0.001	0.418	intronic	GRM8	.
7	126615572	rs62477894	A	G	0.45	0.66	0.44	0.43	0.15	0.32	0.48	0.51	0.29	0.28	0.34	0.12	0.11	0.18	-0.04	-0.05	0.51	0.039	0.084	0.003	0.078	0.213	0.074	0.042	0.418	0.162	0.168	0.187	0.02	0.024	0.052	0.001	0.002	0.418	intronic	GRM8	.
7	126621882	rs62477899	T	C	0.45	0.66	0.43	0.43	0.15	0.32	0.48	0.51	0.28	0.28	0.34	0.11	0.11	0.18	-0.04	-0.04	0.51	0.041	0.09	0.003	0.078	0.213	0.074	0.042	0.418	0.155	0.168	0.187	0.017	0.023	0.052	0.001	0.002	0.418	intronic	GRM8	.
7	126622691	rs62477900	A	G	0.45	0.66	0.44	0.43	0.15	0.32	0.48	0.51	0.29	0.28	0.34	0.12	0.11	0.18	-0.04	-0.05	0.51	0.039	0.084	0.003	0.08	0.213	0.074	0.042	0.418	0.162	0.165	0.187	0.02	0.022	0.052	0.001	0.001	0.418	intronic	GRM8	.
6	34040229	rs2229900	G	A	0.69	0.55	0.66	0.76	0.25	0.76	0.54	0.3	0.41	0.51	-0.21	-0.1	0.01	0	0.12	0.22	0.51	0.05	0.026	0.027	0.117	0.162	0.407	0.091	0.15	0.273	0.417	0.106	0.022	0.004	0.005	0.019	0.101	0.417	exonic	GRM4	synonymous
15	40281474	rs12440450	G	T	0.25	0.73	0.21	0.26	0.36	0.2	0.69	0.37	-0.15	-0.1	0.53	0.01	0.06	0.03	-0.49	-0.43	0.53	0.235	0.417	0.003	0.35	0.196	0.055	0.39	0.213	0.055	0.024	0.416	0.004	0.003	0.005	0.392	0.329	0.417	exonic	LOC100131244	synonymous SNV
1	8977487	rs6673038	G	A	0.47	0.77	0.45	0.48	0.26	0.33	0.7	0.51	0.19	0.22	0.44	0.11	0.14	0.07	-0.26	-0.23	0.51	0.09	0.195	0.001	0.159	0.328	0.008	0.238	0.414	0.065	0.092	0.321	0.02	0.038	0.007	0.126	0.095	0.414	intergenic	CA6;SLC2A7	.
17	33676800	rs3115687	G	A	0.73	0.78	0.72	0.75	0.26	0.77	0.77	0.52	0.46	0.49	0.01	-0.05	-0.02	0.01	-0.06	-0.03	0.52	0.001	0.002	0.002	0.002	0.414	0.408	0.004	0.406	0.341	0.365	0.005	0.003	0.001	0.005	0.004	0	0.414	intronic	ASIC2	.
7	126732335	rs2299500	G	A	0.47	0.74	0.45	0.44	0.22	0.37	0.5	0.52	0.22	0.21	0.37	0.07	0.06	0.25	-0.05	-0.06	0.52	0.077	0.158	0.003	0.147	0.146	0.049	0.024	0.414	0.091	0.1	0.223	0.003	0.006	0.104	0.003	0.001	0.414	intronic	GRM8	.
1	6562115	rs3861755	G	A	0.55	0.51	0.49	0.61	0.1	0.54	0.43	0.41	0.39	0.52	-0.03	-0.05	0.07	0.08	0.06	0.19	0.52	0.015	0.005	0.022	0.019	0.245	0.371	0.02	0.336	0.296	0.414	0.001	0.001	0.004	0.002	0.004	0.055	0.414	intronic	TAS1R1	.
1	6562229	rs7412903	C	T	0.55	0.51	0.49	0.61	0.1	0.54	0.43	0.41	0.39	0.52	-0.03	-0.05	0.07	0.08	0.06	0.19	0.52	0.015	0.005	0.022	0.019	0.245	0.371	0.02	0.336	0.296	0.414	0.001	0.001	0.004	0.002	0.004	0.055	0.414	intronic	TAS1R1	.
15	40297259	rs12438880	C	G	0.26	0.71	0.2	0.3	0.36	0.2	0.7	0.36	-0.16	-0.06	0.51	-0.01	0.1	0.01	-0.5	-0.4	0.51	0.206	0.4	0.019	0.273	0.207	0.053	0.396	0.187	0.061	0.008	0.382	0.004	0.014	0.006	0.412	0.291	0.412	intronic	PLCB2	.
15	40297017	rs2305650	C	G	0.26	0.71	0.2	0.29	0.31	0.2	0.7	0.4	-0.11	-0.02	0.51	-0.01	0.09	0.01	-0.5	-0.41	0.51	0.207	0.4	0.018	0.275	0.259	0.025	0.396	0.24	0.031	0.002	0.382	0.004	0.013	0.006	0.412	0.293	0.412	intronic	PLCB2	.
7	126790153	rs62470209	G	A	0.45	0.67	0.44	0.4	0.16	0.31	0.46	0.51	0.28	0.24	0.36	0.13	0.09	0.22	-0.01	-0.05	0.51	0.048	0.089	0.002	0.106	0.181	0.057	0.037	0.411	0.151	0.132	0.205	0.025	0.017	0.07	0.003	0	0.411	intronic	GRM8	.
1	6563439	rs4908563	C	T	0.54	0.48	0.49	0.61	0.1	0.53	0.42	0.39	0.39	0.52	-0.05	-0.04	0.08	0.06	0.07	0.19	0.52	0.016	0.005	0.02	0.027	0.24	0.359	0.018	0.312	0.296	0.411	0.001	0.001	0.005	0.001	0.005	0.056	0.411	intronic	TAS1R1	.
7	126616006	rs147797731	A	G	0.45	0.65	0.44	0.44	0.15	0.32	0.48	0.5	0.29	0.28	0.33	0.12	0.11	0.18	-0.03	-0.04	0.5	0.035	0.076	0.003	0.072	0.213	0.074	0.042	0.41	0.165	0.168	0.179	0.022	0.024	0.047	0.001	0.002	0.41	intronic	GRM8	.
7	126626292	rs17611405	T	C	0.45	0.65	0.44	0.43	0.15	0.32	0.48	0.5	0.28	0.28	0.33	0.11	0.11	0.18	-0.04	-0.04	0.5	0.037	0.082	0.003	0.072	0.213	0.074	0.042	0.41	0.159	0.168	0.179	0.019	0.024	0.047	0	0.002	0.41	intronic	GRM8	.
7	126622941	rs6467092	C	T	0.45	0.65	0.44	0.43	0.15	0.32	0.48	0.5	0.29	0.28	0.33	0.12	0.11	0.18	-0.04	-0.05	0.5	0.037	0.079	0.003	0.077	0.213	0.074	0.042	0.41	0.162	0.162	0.179	0.02	0.021	0.047	0.001	0.001	0.41	intronic	GRM8	.
7	126613777	rs6943485	T	C	0.45	0.65	0.44	0.43	0.15	0.32	0.48	0.5	0.29	0.27	0.33	0.12	0.1	0.18	-0.04	-0.05	0.5	0.037	0.079	0.004	0.077	0.213	0.074	0.042	0.41	0.162	0.162	0.179	0.02	0.021	0.047	0.001	0.001	0.41	intronic	GRM8	.
7	126619290	rs7788176	C	T	0.45	0.65	0.44	0.42	0.15	0.32	0.48	0.5	0.29	0.27	0.33	0.12	0.1	0.18	-0.04	-0.05	0.5	0.039	0.079	0.003	0.082	0.213	0.074	0.042	0.41	0.162	0.156	0.179	0.02	0.018	0.047	0.001	0	0.41	intronic	GRM8	.
17	33422168	rs35578035	C	T	0.44	0.85	0.42	0.4	0.57	0.33	0.82	0.27	-0.16	-0.17	0.52	0.09	0.07	0.03	-0.4	-0.42	0.52	0.162	0.299	0.003	0.301	0.129	0.11	0.395	0.143	0.046	0.048	0.409	0.011	0.011	0.005	0.286	0.288	0.409	intronic	ASIC2	.
17	33374151	rs4131974	A	C	0.69	0.29	0.73	0.73	0.7	0.72	0.23	-0.42	0.03	0.02	-0.43	0.01	0.01	0.05	0.5	0.5	0.5	0.18	0.326	0.002	0.297	0.361	0.004	0.384	0.273	0	0.003	0.296	0.003	0.004	0.007	0.409	0.381	0.409	intronic	ASIC2	.
6	88170209	rs9344757	T	G	0.64	0.89	0.63	0.64	0.38	0.67	0.76	0.52	0.25	0.27	0.22	-0.05	-0.03	0.14	-0.13	-0.11	0.52	0.063	0.145	0.002	0.122	0.255	0.158	0.014	0.408	0.11	0.133	0.107	0.002	0.003	0.043	0.038	0.025	0.408	intergenic	CNR1;LOC101928936	.
3	7105521	rs1318267	A	G	0.72	0.64	0.69	0.75	0.25	0.75	0.67	0.39	0.44	0.5	-0.11	-0.06	0	-0.04	0.01	0.07	0.5	0.009	0.003	0.004	0.026	0.31	0.4	0.008	0.274	0.339	0.408	0.021	0.002	0.004	0.003	0.003	0.011	0.408	intronic	GRM7	.
7	126728772	rs6974018	A	G	0.47	0.74	0.45	0.44	0.23	0.37	0.5	0.52	0.22	0.22	0.37	0.08	0.07	0.25	-0.04	-0.05	0.52	0.073	0.154	0.003	0.14	0.141	0.046	0.024	0.407	0.09	0.101	0.223	0.004	0.008	0.104	0.002	0.001	0.407	intronic	GRM8	.
7	127077938	rs2237785	A	C	0.6	0.76	0.65	0.56	0.26	0.38	0.67	0.5	0.39	0.3	0.37	0.26	0.17	0.08	-0.03	-0.12	0.5	0.038	0.028	0.016	0.09	0.293	0.03	0.153	0.406	0.258	0.155	0.253	0.127	0.05	0.015	0.002	0.028	0.406	intronic	GRM8	.
6	33666163	rs1570759	G	A	0.57	0.41	0.66	0.49	0.16	0.3	0.45	0.25	0.5	0.33	0.11	0.36	0.19	-0.04	0.22	0.05	0.5	0.061	0.117	0.061	0.005	0.172	0.05	0.038	0.148	0.406	0.203	0.021	0.231	0.063	0.004	0.092	0	0.406	intronic	ITPR3	.
17	33067994	rs223038	C	T	0.48	0.72	0.47	0.49	0.2	0.38	0.67	0.52	0.27	0.29	0.34	0.09	0.11	0.05	-0.2	-0.17	0.52	0.042	0.1	0.001	0.073	0.361	0.075	0.143	0.405	0.137	0.169	0.173	0.008	0.021	0.003	0.076	0.052	0.405	intronic	ASIC2	.
3	7017719	rs9842513	C	T	0.44	0.67	0.39	0.4	0.17	0.44	0.54	0.5	0.22	0.23	0.23	-0.05	-0.04	0.13	-0.15	-0.13	0.5	0.065	0.142	0.001	0.116	0.255	0.154	0.014	0.405	0.097	0.119	0.089	0.003	0.002	0.025	0.046	0.03	0.405	intronic	GRM7	.
7	127208509	rs7784231	G	A	0.73	0.92	0.68	0.79	0.42	0.72	0.87	0.5	0.25	0.37	0.2	-0.04	0.07	0.04	-0.2	-0.08	0.5	0.069	0.15	0.035	0.052	0.361	0.159	0.068	0.404	0.107	0.249	0.111	0.003	0.009	0.003	0.109	0.022	0.404	intronic	GRM8	.
7	141785891	rs17464232	G	A	0.44	0.73	0.41	0.4	0.22	0.45	0.69	0.51	0.19	0.18	0.28	-0.04	-0.05	0.04	-0.28	-0.29	0.51	0.087	0.163	0.003	0.176	0.365	0.111	0.107	0.403	0.08	0.07	0.132	0.002	0.001	0.003	0.137	0.15	0.403	intergenic	TAS2R4;TAS2R5	.
7	141785723	rs62477708	T	C	0.44	0.73	0.41	0.4	0.22	0.45	0.68	0.51	0.19	0.18	0.28	-0.04	-0.05	0.04	-0.28	-0.29	0.51	0.088	0.163	0.003	0.179	0	0	0	0.403	0.08	0.068	0.132	0.002	0.001	0.002	0.133	0.147	0.403	intergenic	TAS2R4;TAS2R5	.
7	141785997	rs62477709	T	C	0.44	0.73	0.41	0.39	0.22	0.45	0.69	0.51	0.19	0.18	0.28	-0.04	-0.06	0.04	-0.28	-0.3	0.51	0.09	0.164	0.003	0.183	0	0	0	0.403	0.079	0.066	0.132	0.002	0.002	0.003	0.138	0.156	0.403	intergenic	TAS2R4;TAS2R5	.
7	141792710	rs13223346	A	G	0.44	0.73	0.4	0.4	0.22	0.45	0.68	0.51	0.19	0.18	0.28	-0.04	-0.05	0.04	-0.28	-0.29	0.51	0.089	0.167	0.003	0.179	0.359	0.111	0.103	0.403	0.077	0.068	0.132	0.001	0.001	0.002	0.136	0.147	0.403	intergenic	TAS2R5;PRSS37	.
6	33670403	rs2229634	C	T	0.56	0.42	0.66	0.49	0.16	0.3	0.42	0.25	0.5	0.33	0.12	0.36	0.2	-0.01	0.24	0.07	0.5	0.057	0.108	0.059	0.003	0.149	0.046	0.028	0.155	0.402	0.203	0.027	0.232	0.067	0.005	0.109	0.005	0.402	exonic	ITPR3	synonymous
6	33668883	rs2296336	C	G	0.56	0.42	0.66	0.49	0.16	0.29	0.44	0.25	0.5	0.33	0.12	0.37	0.2	-0.02	0.23	0.05	0.5	0.059	0.108	0.063	0.002	0.162	0.043	0.039	0.155	0.402	0.197	0.03	0.238	0.066	0.005	0.096	0	0.402	intronic	ITPR3	.
15	40290906	rs117658605	T	G	0.25	0.71	0.2	0.28	0.3	0.2	0.69	0.42	-0.1	-0.02	0.51	0	0.08	0.02	-0.49	-0.41	0.51	0.212	0.395	0.011	0.292	0.27	0.018	0.39	0.257	0.022	0.002	0.382	0.004	0.008	0.006	0.402	0.304	0.402	intronic	PLCB2	.
7	141798667	rs11762219	T	C	0.44	0.72	0.41	0.4	0.21	0.45	0.68	0.51	0.2	0.18	0.27	-0.04	-0.05	0.04	-0.28	-0.29	0.51	0.084	0.156	0.003	0.172	0.365	0.116	0.103	0.401	0.084	0.072	0.125	0.002	0.001	0.003	0.133	0.148	0.401	intergenic	TAS2R5;PRSS37	.
7	141761773	rs62476657	T	G	0.43	0.7	0.39	0.39	0.19	0.45	0.68	0.51	0.2	0.2	0.25	-0.06	-0.06	0.01	-0.29	-0.3	0.51	0.071	0.135	0.003	0.145	0.397	0.141	0.103	0.394	0.095	0.087	0.093	0.001	0.003	0.005	0.146	0.155	0.397	intergenic	SSBP1;TAS2R3	.
16	28857143	rs7499878	C	T	0.68	0.43	0.77	0.62	0.26	0.27	0.47	0.17	0.51	0.36	0.16	0.5	0.35	-0.03	0.3	0.16	0.51	0.098	0.226	0.034	0.09	0.084	0.005	0.076	0.043	0.395	0.238	0.037	0.385	0.227	0	0.164	0.049	0.395	intronic	SH2B1	.
7	126728238	rs10256873	A	G	0.68	0.78	0.63	0.68	0.28	0.62	0.6	0.5	0.34	0.39	0.16	0	0.06	0.18	0.03	0.08	0.5	0.023	0.059	0.008	0.019	0.179	0.204	0.004	0.393	0.191	0.271	0.052	0.004	0.004	0.069	0.004	0.011	0.393	intronic	GRM8	.
3	7716420	rs1857697	T	C	0.49	0.75	0.46	0.43	0.25	0.44	0.74	0.5	0.21	0.18	0.31	0.01	-0.01	0.01	-0.28	-0.3	0.5	0.081	0.149	0.002	0.17	0.382	0.077	0.16	0.392	0.086	0.069	0.165	0.003	0.004	0.006	0.144	0.164	0.392	intronic	GRM7	.
16	28861467	rs7193274	C	G	0.67	0.43	0.76	0.61	0.26	0.27	0.47	0.17	0.5	0.35	0.16	0.49	0.34	-0.03	0.3	0.15	0.5	0.096	0.222	0.037	0.082	0.084	0.005	0.076	0.043	0.391	0.227	0.037	0.38	0.217	0	0.16	0.043	0.391	intronic	SH2B1	.
16	28860645	rs7201929	T	C	0.67	0.43	0.76	0.61	0.26	0.27	0.47	0.17	0.5	0.35	0.16	0.49	0.34	-0.03	0.3	0.15	0.5	0.096	0.222	0.037	0.082	0.084	0.005	0.076	0.043	0.391	0.227	0.037	0.38	0.217	0	0.16	0.043	0.391	intronic	SH2B1	.
16	53872940	rs7188378	C	T	0.58	0.23	0.64	0.62	0.51	0.44	0.14	-0.29	0.13	0.11	-0.22	0.2	0.17	0.09	0.5	0.48	0.5	0.143	0.269	0.004	0.261	0.274	0.004	0.204	0.154	0.021	0.019	0.094	0.06	0.057	0.022	0.39	0.381	0.39	intronic	FTO	.
3	7715393	rs1857696	A	G	0.49	0.74	0.45	0.44	0.25	0.44	0.74	0.5	0.21	0.2	0.3	0.01	0	0	-0.29	-0.3	0.5	0.077	0.145	0.003	0.159	0.388	0.081	0.16	0.39	0.087	0.075	0.158	0.004	0.004	0.006	0.147	0.161	0.39	intronic	GRM7	.
16	28877088	rs9933198	C	T	0.67	0.42	0.77	0.62	0.26	0.27	0.47	0.15	0.5	0.35	0.15	0.5	0.35	-0.05	0.3	0.15	0.5	0.105	0.241	0.038	0.096	0.08	0.006	0.076	0.032	0.389	0.225	0.029	0.385	0.22	0.004	0.164	0.045	0.389	intergenic	SH2B1;ATP2A1	.
