# Supplementary material for: Landscape of Variability in Chemosensory Genes Associated With Dietary Preferences in Indian Population: Analysis of 1029 Indian Genomes
Source: Front Genet. 2022 Jul 12;13:878134. doi: 10.3389/fgene.2022.878134 (PMC9315315; doi:10.3389/fgene.2022.878134)
Supplement: Supplementary file 5 [file Table5.xlsx]

## Sheet: Supplementary5
Supplemental Table 5 : Derived Allele frequencies of high Fst variants in IGV
SNP Information (hg38)						Derived Allele Frequency																														Other annotations
CHROM	POS	rsID	Ancestral Allele	Derived Allele	In Literature	IEEIP1	IEELP2	IEELP4	IEELP5_JBR	IENELP1	IENEIP1	IENIP2	IENLP1	IENLP19_CBP	IENLP18	IENLP5	IENLP9	IEWLP1	IEWLP2	IEWLP3	IEWLP4	IEWLP6	IEWLP7	AACIP1	AACIP6	AAEIP2	DRCIP1	DRSLP5	DRSIP1	DRSLP7	DRSLP8	TBNIP1	DRSLP9_KLE	TBNSP1	OGWIP1	location	GENE	RefGene_function
1	6563439	rs4908563	C	T	YES	0.5	0.3125	0.458333	0.642857	0.611111	0.5	0.5625	0.714286	0.638889	0.636364	0.583333	0.5	0.5	0.625	0.64	0.475	0.571429	0.678571	0.4375	0.535714	0.65	0.666667	0.645833	0.5	0.708333	0.557692	0.5	0.333333	0.5	0.269231	intronic	TAS1R1	.
1	8941503	rs17032875	T	C	NO	0.53125	0.5	0.395833	0.535714	0.5	0.5	0.65625	0.321429	0.388889	0.636364	0.5	0.645833	0.333333	0.625	0.48	0.55	0.619048	0.571429	0.65625	0.535714	0.6	0.666667	0.541667	0.59375	0.615385	0.461538	0.875	0.62963	0.75	0.192308	intergenic	ENO1-AS1;CA6	.
1	167841135	rs204267	T	G	NO	0.53125	0.571429	0.625	0.535714	0.666667	0.766667	0.625	0.607143	0.722222	0.545455	0.694444	0.625	0.722222	0.5	0.6	0.525	0.619048	0.571429	0.65625	0.535714	0.65	0.555556	0.625	0.71875	0.442308	0.423077	0.625	0.574074	0.916667	0.230769	intronic	ADCY10	.
1	167880089	rs203848	A	G	NO	1	1	0.979167	1	0.944444	0.966667	1	0.857143	0.944444	1	0.972222	1	0.972222	0.875	1	0.975	1	0.964286	1	0.964286	1	1	1	0.96875	0.846154	1	1	1	1	0.5	intronic	ADCY10	.
1	167907378	rs203777	T	C	NO	0.9375	0.75	0.729167	0.714286	0.833333	0.6	0.5	0.642857	0.833333	0.681818	0.777778	0.75	0.666667	0.625	0.7	0.85	0.785714	0.785714	0.8125	0.821429	0.85	0.722222	0.875	0.84375	0.634615	0.846154	0.6875	0.833333	0.833333	0.307692	intronic	ADCY10	.
1	167913148	rs203782	A	G	NO	0.9375	0.75	0.729167	0.714286	0.833333	0.566667	0.5	0.642857	0.833333	0.681818	0.777778	0.75	0.666667	0.625	0.7	0.85	0.785714	0.785714	0.8125	0.821429	0.85	0.722222	0.875	0.84375	0.66	0.826923	0.625	0.833333	0.833333	0.307692	intronic	ADCY10	.
3	6908502	rs7644436	A	C	NO	0.9375	1	0.958333	0.892857	0.833333	0.6	0.71875	0.928571	0.944444	0.909091	0.833333	0.895833	0.916667	1	0.86	0.9	0.880952	0.923077	0.875	0.892857	0.8	0.833333	0.9375	0.9375	0.942308	0.980769	0.875	0.833333	1	0.5	intronic	GRM7	.
3	6913186	rs11921083	C	T	NO	0.78125	0.6875	0.791667	0.678571	0.666667	0.333333	0.5	0.678571	0.705882	0.681818	0.777778	0.729167	0.666667	0.75	0.52	0.775	0.642857	0.642857	0.6875	0.714286	0.75	0.611111	0.770833	0.8125	0.807692	0.903846	0.5625	0.685185	0.666667	0.384615	intronic	GRM7	.
3	6914047	rs9311966	C	T	NO	0.6875	0.5625	0.6875	0.642857	0.666667	0.333333	0.46875	0.678571	0.694444	0.636364	0.75	0.625	0.666667	0.625	0.46	0.625	0.547619	0.571429	0.59375	0.642857	0.7	0.555556	0.708333	0.75	0.729167	0.846154	0.5625	0.611111	0.666667	0.384615	intronic	GRM7	.
3	7322200	rs6443104	A	G	NO	0.34375	0.928571	0.645833	0.428571	0.5	0.2	0.625	0.642857	NA	0.681818	0.388889	0.583333	0.555556	0.625	0.68	0.6	0.380952	0.607143	0.25	NA	0.65	0.444444	0.5	0.40625	0.704545	0.480769	0.5625	0.518519	0.583333	0.269231	intronic	GRM7	.
3	7373765	rs10510366	A	G	NO	0.90625	0.785714	0.875	0.928571	0.833333	1	0.875	0.714286	0.861111	0.818182	0.805556	0.854167	0.805556	0.875	0.84	0.825	0.880952	0.857143	0.875	1	0.9	0.944444	0.895833	0.6875	0.865385	0.807692	1	0.907407	1	0.692308	intronic	GRM7	.
3	7728460	rs162722	C	T	NO	0.9375	0.6875	0.791667	0.928571	0.833333	0.866667	0.78125	0.678571	0.833333	0.818182	0.694444	0.75	0.777778	0.875	0.62	0.75	0.809524	0.857143	0.90625	0.821429	0.7	0.888889	0.8125	0.96875	0.76	0.75	0.75	0.851852	0.75	0.423077	intronic	GRM7	.
3	7740684	rs9826579	C	T	NO	0.9375	0.625	0.791667	0.928571	0.833333	0.833333	0.75	0.678571	0.833333	0.727273	0.694444	0.770833	0.75	0.75	0.66	0.775	0.857143	0.857143	0.90625	0.857143	0.7	0.944444	0.8125	0.9375	0.788462	0.75	0.8125	0.888889	0.666667	0.423077	UTR3	GRM7	.
4	26471598	rs3113032	G	A	NO	0.8125	0.8125	0.6875	0.642857	0.777778	0.466667	0.71875	0.821429	0.555556	0.681818	0.611111	0.729167	0.722222	0.75	0.8	0.7	0.857143	0.571429	0.71875	0.75	0.65	0.888889	0.583333	0.9375	0.730769	0.673077	0.375	0.759259	0.666667	0.307692	intergenic	RBPJ;CCKAR	.
6	32998165	rs176248	A	G	NO	0.833333	0.8125	0.895833	0.857143	0.833333	0.833333	0.9375	0.857143	0.766667	0.863636	0.861111	0.916667	0.861111	0.875	0.84	0.925	0.928571	0.928571	0.9375	1	1	0.833333	0.9375	0.84375	0.795455	0.769231	0.875	0.814815	0.916667	0.615385	intergenic	BRD2;HLA-DOA	.
6	33666163	rs1570759	G	A	NO	0.59375	0.571429	0.5625	0.642857	0.666667	0.366667	0.46875	0.571429	0.527778	0.363636	0.5	0.5625	0.472222	0.375	0.54	0.5	0.595238	0.642857	0.71875	0.821429	0.8	0.777778	0.541667	0.75	0.615385	0.538462	0.5625	0.518519	0.25	0.346154	intronic	ITPR3	.
6	33670403	rs2229634	C	T	NO	0.59375	0.5625	0.520833	0.642857	0.666667	0.366667	0.46875	0.571429	0.527778	0.363636	0.472222	0.5625	0.472222	0.375	0.54	0.5	0.571429	0.642857	0.71875	0.821429	0.8	0.777778	0.541667	0.75	0.596154	0.519231	0.5625	0.518519	0.25	0.307692	exonic	ITPR3	synonymous
6	33685671	rs749338	C	T	NO	0.6875	0.6875	0.782609	0.571429	0.833333	0.7	0.78125	0.75	0.722222	0.863636	0.583333	0.729167	0.722222	0.75	0.66	0.8	0.738095	0.607143	0.8125	0.857143	0.85	0.666667	0.75	0.75	0.75	0.673077	0.625	0.759259	0.75	0.346154	exonic	ITPR3	synonymous
6	34023591	rs7772436	C	T	NO	1	0.9375	0.9375	1	1	0.966667	0.875	0.964286	1	0.954545	0.916667	1	1	1	0.98	0.95	0.952381	0.964286	1	0.964286	0.95	0.944444	0.979167	1	0.980769	0.980769	1	0.981481	1	0.5	intronic	GRM4	.
6	88168233	rs2180619	G	A	NO	0.59375	0.75	0.583333	0.428571	0.666667	0.9	0.8125	0.535714	0.444444	0.5	0.722222	0.625	0.583333	0.625	0.56	0.65	0.52381	0.5	0.65625	0.75	0.65	0.611111	0.604167	0.875	0.557692	0.673077	1	0.574074	0.833333	0.538462	intergenic	CNR1;LOC101928936	.
6	88170209	rs9344757	T	G	NO	0.625	0.8125	0.604167	0.464286	0.666667	0.9	0.84375	0.571429	0.5	0.590909	0.777778	0.6875	0.638889	0.625	0.66	0.7	0.571429	0.714286	0.71875	0.75	0.7	0.611111	0.666667	0.875	0.692308	0.68	1	0.592593	0.916667	0.538462	intergenic	CNR1;LOC101928936	.
6	88170982	rs9353528	T	C	NO	0.59375	0.6875	0.5625	0.392857	0.666667	0.9	0.8125	0.464286	0.375	0.5	0.666667	0.5625	0.583333	0.625	0.46	0.625	0.52381	0.428571	0.6875	0.730769	0.6	0.611111	0.5	0.84375	0.52	0.634615	0.8125	0.537037	0.833333	0.538462	intergenic	CNR1;LOC101928936	.
7	22717470	rs6461662	T	C	NO	0.59375	0.4375	0.5	0.75	0.555556	0.6	0.53125	0.428571	0.611111	0.636364	0.527778	0.458333	0.638889	0.375	0.52	0.425	0.642857	0.464286	0.5625	0.821429	0.8	0.777778	0.604167	0.9375	0.634615	0.634615	0.5625	0.703704	0.666667	0.230769	intergenic	MGC87042(dist=217188),IL6(dist=9677)	.
7	22726627	rs1800796	G	C	NO	0.53125	0.625	0.6875	0.392857	0.444444	0.566667	0.5625	0.535714	0.638889	0.590909	0.777778	0.833333	0.527778	0.75	0.76	0.7	0.5	0.642857	0.53125	0.214286	0.45	0.388889	0.479167	0.125	0.653846	0.480769	0.625	0.666667	0.583333	0.884615	upstream	IL6	.
7	22728505	rs1474347	C	A	NO	0.875	1	0.833333	0.892857	1	1	0.9375	0.892857	0.888889	0.75	0.764706	0.791667	0.916667	0.875	0.76	0.875	0.880952	0.821429	0.96875	0.928571	0.85	0.888889	0.916667	1	0.788462	0.942308	1	0.777778	0.75	0.807692	intronic	IL6	.
7	22729088	rs1554606	T	G	NO	0.84375	1	0.770833	0.892857	0.944444	0.966667	0.90625	0.892857	0.805556	0.727273	0.611111	0.6875	0.888889	0.875	0.7	0.875	0.857143	0.75	0.90625	0.928571	0.85	0.888889	0.916667	1	0.711538	0.884615	1	0.759259	0.75	0.615385	intronic	IL6	.
7	45664372	rs1042009	G	A	NO	0.625	0.6875	0.8125	0.714286	0.611111	0.633333	0.5	0.75	0.722222	0.727273	0.75	0.8125	0.861111	0.625	0.68	0.625	0.738095	0.785714	0.71875	0.75	0.65	0.777778	0.770833	0.59375	0.826923	0.769231	0.625	0.648148	0.75	0.307692	exonic	ADCY1	synonymous
7	45682320	rs4724425	T	C	NO	0.65625	0.6875	0.8125	0.785714	0.611111	0.633333	0.5625	0.75	0.722222	0.681818	0.722222	0.770833	0.833333	0.625	0.7	0.675	0.857143	0.785714	0.75	0.75	0.8	0.833333	0.770833	0.40625	0.846154	0.76	0.625	0.703704	0.75	0.423077	intronic	ADCY1	.
7	45708921	rs2248284	T	C	NO	0.625	0.714286	0.770833	0.642857	0.555556	0.6	0.46875	0.714286	0.555556	0.681818	0.5	0.729167	0.777778	0.5	0.6	0.65	0.809524	0.821429	0.71875	0.75	0.75	0.833333	0.75	0.40625	0.730769	0.711538	0.5625	0.592593	0.583333	0.269231	intronic	ADCY1	.
7	45718207	rs2461127	G	A	NO	0.625	0.625	0.729167	0.607143	0.555556	0.566667	0.46875	0.714286	0.555556	0.681818	0.416667	0.729167	0.777778	0.5	0.625	0.625	0.714286	0.714286	0.6875	0.75	0.65	0.777778	0.75	0.40625	0.711538	0.7	0.5625	0.537037	0.583333	0.269231	UTR3	ADCY1	.
7	45719663	rs2471267	C	T	NO	0.625	0.625	0.708333	0.571429	0.555556	0.566667	0.46875	0.678571	0.555556	0.681818	0.361111	0.6875	0.777778	0.5	0.52	0.625	0.714286	0.678571	0.65625	0.714286	0.6	0.777778	0.6875	0.40625	0.692308	0.7	0.5625	0.481481	0.583333	0.230769	UTR3	ADCY1	.
7	80478482	rs6467192	A	G	NO	0.875	0.875	0.854167	0.857143	0.666667	0.8	0.875	1	0.861111	0.909091	0.833333	0.666667	0.861111	0.875	0.84	0.95	0.880952	0.714286	0.875	0.821429	0.95	0.833333	0.958333	1	0.923077	0.884615	0.75	0.907407	1	0.538462	intronic	GNAT3	.
7	80494683	rs6975345	C	T	NO	0.875	0.8125	0.8125	0.857143	0.666667	0.8	0.875	1	NA	0.909091	0.833333	0.666667	0.861111	0.875	0.84	0.95	0.928571	0.714286	0.875	NA	0.95	0.833333	0.958333	1	0.8125	0.88	0.75	0.903846	1	0.307692	intronic	GNAT3	.
7	80519352	rs6467221	T	G	NO	0.59375	0.4375	0.666667	0.642857	0.5	0.433333	0.46875	0.857143	0.666667	0.727273	0.777778	0.479167	0.611111	0.625	0.66	0.625	0.690476	0.535714	0.59375	0.571429	0.5	0.444444	0.791667	0.625	0.72	0.615385	0.6875	0.611111	0.666667	0.346154	intergenic	GNAT3;CD36	.
7	126728238	rs10256873	A	G	YES	0.5625	0.642857	0.770833	0.5	0.611111	0.566667	0.6875	0.821429	0.694444	0.863636	0.638889	0.5625	0.722222	0.625	0.78	0.725	0.714286	0.821429	0.625	0.571429	0.75	0.611111	0.625	0.5625	0.576923	0.653846	0.6875	0.648148	0.75	0.346154	intronic	GRM8	.
7	127077938	rs2237785	A	C	NO	0.65625	0.3125	0.520833	0.678571	0.666667	0.633333	0.75	0.535714	0.583333	0.318182	0.611111	0.6875	0.555556	0	0.58	0.525	0.595238	0.571429	0.53125	0.428571	0.65	0.444444	0.5625	0.84375	0.519231	0.557692	0.875	0.574074	0.75	0.461538	intronic	GRM8	.
7	127105496	rs6975798	T	C	NO	0.53125	0.5	0.583333	0.5	0.722222	0.533333	0.733333	0.714286	0.472222	0.772727	0.583333	0.625	0.694444	0.875	0.66	0.65	0.595238	0.5	0.46875	0.678571	0.9	0.555556	0.625	0.6	0.519231	0.538462	1	0.611111	0.666667	0.346154	intronic	GRM8	.
7	127227234	rs2106149	T	C	NO	0.5625	0.5	0.583333	0.428571	0.722222	0.733333	0.59375	0.678571	0.361111	0.363636	0.472222	0.625	0.722222	0.75	0.54	0.525	0.52381	0.5	0.4375	0.607143	0.8	0.666667	0.5625	0.40625	0.461538	0.653846	0.5625	0.555556	0.75	0.269231	intronic	GRM8	.
7	127250652	rs10270765	A	G	NO	0.8125	0.875	0.833333	0.821429	0.944444	0.9	0.875	0.821429	0.777778	0.727273	0.666667	0.916667	0.833333	1	0.88	0.85	0.952381	0.821429	0.71875	0.678571	0.95	0.833333	0.8125	0.65625	0.75	0.78	1	0.777778	0.75	0.461538	intronic	GRM8	.
7	141779000	rs2234002	G	A	NO	0.71875	0.625	0.6875	0.571429	0.611111	0.866667	0.71875	0.535714	0.416667	0.363636	0.611111	0.717391	0.555556	0.625	0.44	0.55	0.690476	0.785714	0.71875	0.846154	0.65	0.8125	0.604167	0.6875	0.519231	0.557692	0.6875	0.648148	0.666667	0.307692	exonic	TAS2R4	nonsynonymous
7	143224141	rs534126	T	C	NO	0.75	0.8125	0.729167	0.857143	0.666667	0.933333	0.71875	0.642857	0.638889	0.818182	0.722222	0.666667	0.722222	0.875	0.74	0.725	0.619048	0.857143	0.6875	0.642857	0.85	0.833333	0.75	0.71875	0.692308	0.826923	0.875	0.703704	0.75	0.423077	intergenic	TAS2R40;LOC105375545	.
7	143225569	rs9918515	G	A	NO	0.75	0.8125	0.729167	0.857143	0.666667	0.933333	0.71875	0.607143	0.611111	0.818182	0.666667	0.666667	0.638889	0.875	0.72	0.725	0.619048	0.857143	0.6875	0.642857	0.85	0.833333	0.75	0.71875	0.673077	0.826923	0.875	0.685185	0.666667	0.423077	intergenic	TAS2R40;LOC105375545	.
8	72021397	rs6996723	T	C	NO	0.59375	0.9375	0.8125	1	0.944444	1	0.9375	0.928571	0.777778	0.909091	0.805556	0.854167	0.833333	1	0.74	0.9	0.833333	0.785714	0.875	0.821429	0.9	1	0.854167	0.90625	0.826923	0.846154	1	0.777778	1	0.384615	ncRNA_UTR3	TRPA1	.
10	112988738	rs4074720	T	C	NO	0.65625	0.625	0.583333	0.607143	0.666667	0.866667	0.7	0.642857	0.555556	0.590909	0.527778	0.708333	0.666667	0.625	0.56	0.55	0.571429	0.535714	0.6875	0.714286	0.8	0.722222	0.645833	0.71875	0.519231	0.673077	0.8125	0.648148	0.916667	0.269231	intronic	TCF7L2	.
10	113017965	rs10885406	G	A	NO	0.625	0.625	0.583333	0.607143	0.722222	0.866667	0.6875	0.642857	0.555556	0.590909	0.555556	0.708333	0.694444	0.625	0.58	0.55	0.47619	0.571429	0.6875	0.75	0.8	0.666667	0.645833	0.71875	0.538462	0.673077	0.8125	0.611111	0.916667	0.230769	intronic	TCF7L2	.
10	113050481	rs12265291	C	T	NO	0.65625	0.625	0.583333	0.642857	0.666667	0.866667	0.65625	0.678571	0.583333	0.590909	0.555556	0.729167	0.694444	0.625	0.64	0.575	0.47619	0.571429	0.71875	0.607143	0.8	0.722222	0.645833	0.71875	0.538462	0.673077	0.8125	0.592593	0.916667	0.230769	intronic	TCF7L2	.
10	113061490	rs11196212	C	T	NO	0.65625	0.625	0.604167	0.642857	0.5	0.866667	0.6875	0.607143	0.583333	0.5	0.472222	0.645833	0.694444	0.625	0.64	0.6	0.5	0.5	0.65625	0.571429	0.8	0.722222	0.583333	0.71875	0.519231	0.557692	0.8125	0.592593	0.916667	0.230769	intronic	TCF7L2	.
10	113074739	rs7908486	A	G	NO	0.5625	0.625	0.583333	0.464286	0.833333	0.666667	0.5625	0.5	0.666667	0.681818	0.694444	0.458333	0.416667	0.75	0.6	0.4	0.5	0.428571	0.6875	0.5	0.55	0.5	0.458333	0.5625	0.519231	0.538462	0.9375	0.537037	0.583333	0.115385	intronic	TCF7L2	.
10	113155455	rs290483	G	T	NO	0.875	0.285714	0.708333	0.714286	0.444444	0.8	0.84375	0.5	0.638889	0.863636	0.777778	0.6875	0.666667	0.5	0.7	0.75	0.714286	0.821429	0.78125	0.964286	0.9	0.666667	0.75	0.8125	0.826923	0.634615	0.875	0.722222	0.666667	0.461538	intronic	TCF7L2	.
12	6357205	rs7972292	C	T	NO	0.875	1	0.75	0.75	0.833333	0.766667	0.8125	0.75	0.861111	0.772727	0.861111	0.666667	0.888889	0.875	0.8	0.825	0.738095	0.892857	0.875	0.892857	0.85	0.833333	0.8125	0.78125	0.903846	0.807692	0.9375	0.851852	0.916667	0.423077	intronic	SCNN1A	.
12	10986253	rs1376251	C	T	NO	0.78125	0.625	0.375	0.75	0.777778	0.6	0.625	0.5	0.666667	0.5	0.361111	0.604167	0.777778	0.5	0.68	0.575	0.666667	0.5	0.78125	0.785714	0.7	0.5	0.791667	0.53125	0.634615	0.75	0.6875	0.62963	0.583333	0.230769	exonic	TAS2R50	nonsynonymous
12	10991202	rs10845271	C	T	NO	0.8125	0.625	0.395833	0.75	0.833333	0.6	0.625	0.5	0.65625	0.545455	0.388889	0.604167	0.777778	0.5	0.7	0.625	0.714286	0.535714	0.78125	0.875	0.7	0.5	0.791667	0.53125	NA	0.75	0.6875	0.692308	0.583333	0.269231
12	10997112	rs10845279	C	A	NO	0.8125	0.625	0.395833	0.714286	0.833333	0.6	0.625	0.5	0.5	0.545455	0.388889	0.604167	0.777778	0.5	0.7	0.625	0.714286	0.535714	0.733333	0.791667	0.7	0.5	0.791667	0.53125	NA	0.75	0.6875	0.692308	0.583333	0.269231	exonic	TAS2R20	nonsynonymous
12	11003524	rs10772413	C	T	NO	0.6875	0.285714	0.395833	0.75	0.833333	0.6	0.3125	0.5	0.676471	0.545455	0.388889	0.604167	0.78125	0.5	0.7	0.631579	0.714286	0.535714	0.6875	NA	0.4	0.375	0.8125	0.53125	NA	0.75	0.375	0.68	0.333333	0.269231	intronic	PRH1,PRR4	.
12	11191389	rs7132674	A	G	NO	0.78125	0.6875	0.458333	0.857143	0.777778	0.633333	0.59375	0.571429	0.777778	0.590909	0.638889	0.625	0.833333	0.5	0.8	0.65	0.714286	0.607143	0.78125	0.785714	0.7	0.5	0.8125	0.625	0.711538	0.826923	0.6875	0.759259	0.583333	0.269231	intergenic	TAS2R42;PRB3	.
12	88050783	rs2468239	G	A	NO	1	0.75	0.875	0.892857	0.833333	0.966667	0.9375	0.821429	0.823529	0.954545	0.944444	0.854167	0.882353	0.875	0.86	0.925	0.928571	0.785714	0.8125	NA	0.9	0.944444	0.875	0.78125	0.923077	0.788462	1	0.903846	0.833333	0.5	intronic	CEP290	.
12	88050815	rs2468240	G	A	NO	0.71875	0.6875	0.583333	0.607143	0.722222	0.666667	0.75	0.642857	0.555556	0.818182	0.666667	0.666667	0.694444	0.75	0.58	0.525	0.714286	0.571429	0.4375	0.423077	0.55	0.722222	0.479167	0.53125	0.64	0.576923	0.8125	0.557692	0.666667	0.230769	intronic	CEP290	.
12	88111301	rs2468255	T	C	NO	1	0.928571	0.875	0.892857	0.833333	0.966667	0.9375	0.821429	0.852941	0.954545	0.944444	0.854167	0.861111	0.875	0.86	0.925	0.928571	0.785714	0.8125	0.666667	0.9	0.944444	0.875	0.78125	0.92	0.788462	1	0.907407	0.833333	0.5	exonic	CEP290	synonymous
12	88141799	rs2468222	G	A	NO	1	0.857143	0.875	0.892857	0.833333	0.966667	0.9375	0.821429	0.861111	0.954545	0.944444	0.854167	0.861111	0.875	0.86	0.925	0.928571	0.785714	0.8125	0.642857	0.9	0.944444	0.875	0.78125	0.942308	0.788462	1	0.907407	0.833333	0.384615	intronic	CEP290	.
14	72508131	rs12586412	A	G	NO	0.46875	0.375	0.5625	0.428571	0.388889	0.666667	0.78125	0.642857	0.555556	0.5	0.611111	0.416667	0.638889	0.75	0.56	0.625	0.380952	0.428571	0.53125	0.392857	0.65	0.333333	0.5	0.40625	0.557692	0.442308	0.6875	0.555556	0.75	0.384615	intronic	RGS6	.
15	25350665	rs4445877	T	C	NO	0.625	0.6875	0.604167	0.642857	0.722222	0.6	0.59375	0.571429	NA	0.818182	0.722222	0.791667	0.611111	0.75	0.62	0.775	0.738095	0.571429	0.59375	NA	0.65	0.666667	0.604167	0.90625	0.738095	0.673077	0.75	0.673077	0.5	0.538462	intronic	UBE3A	.
15	25353890	rs11855196	A	G	NO	0.65625	0.6875	0.666667	0.714286	NA	0.607143	0.59375	0.607143	0.638889	0.818182	0.722222	0.833333	0.694444	0.75	0.72	0.825	0.785714	0.678571	0.59375	0.821429	0.7	0.666667	0.625	0.9375	0.711538	0.730769	0.75	0.722222	0.5	0.653846	intronic	UBE3A	.
15	25372832	rs4906708	T	C	NO	0.65625	1	0.666667	0.678571	0.722222	0.633333	0.59375	0.571429	0.638889	0.818182	0.722222	0.833333	0.694444	0.75	0.72	0.8	0.785714	0.678571	0.59375	0.821429	0.7	0.666667	0.625	0.9375	0.711538	0.730769	0.75	0.703704	0.666667	0.615385	intronic	UBE3A	.
15	25409602	rs1041933	C	T	NO	0.65625	0.6875	0.666667	0.714286	0.722222	0.633333	0.59375	0.571429	0.638889	0.818182	0.722222	0.833333	0.694444	0.75	0.72	0.825	0.761905	0.678571	0.5625	0.821429	0.7	0.666667	0.625	0.9375	0.692308	0.730769	0.75	0.722222	0.5	0.615385	intronic	UBE3A	.
15	25440319	rs2526025	A	C	NO	0.875	0.875	0.854167	0.928571	0.888889	0.966667	0.96875	0.892857	0.944444	0.863636	0.944444	0.9375	0.861111	0.75	0.76	0.925	0.928571	0.75	0.96875	1	0.9	0.888889	0.854167	0.96875	0.958333	0.884615	1	0.87037	0.916667	0.692308	intergenic	UBE3A;ATP10A	.
16	28860645	rs7201929	T	C	NO	0.6875	0.625	0.645833	0.714286	0.611111	0.566667	0.4375	0.678571	0.666667	0.772727	0.611111	0.729167	0.694444	0.625	0.62	0.65	0.714286	0.607143	0.6875	0.642857	0.75	0.555556	0.770833	0.78125	0.673077	0.692308	0.3125	0.666667	0.333333	0.653846	intronic	SH2B1	.
16	53761724	rs13334933	G	A	NO	0.53125	0.8125	0.854167	0.607143	0.666667	0.866667	0.90625	0.785714	0.694444	0.636364	0.833333	0.854167	0.75	0.875	0.84	0.6	0.761905	0.785714	0.65625	0.75	0.75	0.722222	0.791667	0.59375	0.807692	0.692308	0.5625	0.759259	0.916667	0.384615	intronic	FTO	.
16	53850492	rs10521306	G	A	NO	0.65625	1	0.76087	0.678571	0.555556	0.433333	0.5	0.642857	0.805556	0.818182	0.833333	0.770833	0.777778	0.625	0.76	0.675	0.809524	0.75	0.59375	0.571429	0.7	0.722222	0.75	0.8125	0.692308	0.807692	0.25	0.740741	0.5	0.5	intronic	FTO	.
16	53893411	rs11076008	A	G	NO	0.6875	0.857143	0.666667	0.821429	0.833333	0.7	0.90625	0.928571	0.694444	0.818182	0.833333	0.833333	0.916667	0.875	0.78	0.775	0.833333	0.821429	1	0.846154	0.65	0.666667	0.6875	0.71875	0.788462	0.788462	0.9375	0.807692	0.75	0.346154	intronic	FTO	.
16	53905491	rs9929152	G	A	NO	0.9375	0.75	0.729167	0.821429	0.722222	0.933333	0.96875	0.928571	0.638889	0.772727	0.777778	0.875	0.861111	0.875	0.76	0.8	0.809524	0.857143	0.90625	0.857143	0.75	1	0.854167	0.8125	0.75	0.826923	0.9375	0.833333	0.833333	0.538462	intronic	FTO	.
16	53932151	rs9924072	G	A	NO	0.6875	0.6875	0.541667	0.678571	0.5	0.766667	0.75	0.857143	0.444444	0.727273	0.611111	0.75	0.611111	0.75	0.52	0.4	0.52381	0.642857	0.5625	0.714286	0.6	0.666667	0.666667	0.625	0.673077	0.711538	0.875	0.634615	0.916667	0.269231	intronic	FTO	.
17	3581074	rs150908	G	A	YES	0.625	0.75	0.520833	0.535714	0.444444	0.666667	0.75	0.5	0.555556	0.681818	0.388889	0.416667	0.611111	0.875	0.52	0.55	0.595238	0.535714	0.65625	0.714286	0.55	0.777778	0.458333	0.75	0.576923	0.519231	0.875	0.666667	0.583333	0.115385	intronic	TRPV1	.
17	3597216	rs2277675	C	T	YES	0.6875	0.75	0.583333	0.607143	0.444444	0.9	0.84375	0.535714	0.638889	0.818182	0.611111	0.6875	0.777778	0.875	0.72	0.725	0.666667	0.714286	0.75	0.714286	0.65	0.833333	0.75	0.75	0.653846	0.7	0.75	0.666667	0.583333	0.153846	intronic	TRPV1	.
17	3610425	rs465563	G	A	NO	0.625	0.375	0.625	0.464286	0.777778	0.5	0.53125	0.607143	0.527778	0.318182	0.444444	0.5625	0.555556	0.25	0.62	0.4	0.47619	0.392857	0.375	0.464286	0.7	0.333333	0.416667	0.25	0.634615	0.557692	0.75	0.481481	0.75	0.115385	UTR3	SHPK	.
17	33004407	rs7223092	C	T	NO	0.9375	0.6875	0.770833	0.821429	0.666667	0.866667	0.875	0.678571	0.833333	0.727273	0.722222	0.8125	0.666667	0.75	0.72	0.8	0.761905	0.892857	0.875	0.785714	0.85	0.833333	0.729167	0.8125	0.730769	0.653846	0.9375	0.722222	1	0.5	intergenic	SPACA3;ASIC2	.
17	33410403	rs1354492	T	C	NO	0.46875	0.5	0.625	0.642857	0.611111	0.966667	0.6875	0.5	0.666667	0.636364	0.694444	0.625	0.611111	0.75	0.52	0.625	0.547619	0.464286	0.59375	NA	0.4	0.5	0.520833	0.5625	NA	0.576923	0.875	0.480769	0.583333	0.5	intronic	ASIC2	.
17	33676800	rs3115687	G	A	NO	0.625	0.75	0.770833	0.785714	0.611111	0.6	0.6875	0.607143	0.916667	0.818182	0.777778	0.854167	0.694444	0.5	0.78	0.775	0.785714	0.75	0.8125	0.535714	0.85	0.777778	0.770833	0.53125	0.772727	0.653846	0.875	0.692308	0.583333	0.384615	intronic	ASIC2	.
17	33733690	rs9908295	C	A	NO	0.53125	0.642857	0.6875	0.642857	0.833333	0.633333	0.71875	0.75	0.722222	0.772727	0.583333	0.833333	0.694444	0.75	0.7	0.775	0.619048	0.678571	0.59375	0.5	0.55	0.777778	0.5625	0.5	0.711538	0.769231	0.9375	0.740741	0.833333	0.192308	intronic	ASIC2	.
17	33863298	rs441618	G	A	NO	0.53125	0.642857	0.479167	0.535714	0.666667	0.833333	0.75	0.678571	0.527778	0.681818	0.694444	0.666667	0.638889	0.375	0.5	0.475	0.642857	0.5	0.65625	0.714286	0.55	0.666667	0.666667	0.59375	0.557692	0.596154	0.9375	0.722222	0.666667	0.0384615	intronic	ASIC2	.
17	34012643	rs9899594	T	C	NO	0.375	0.714286	0.625	0.678571	0.666667	0.666667	0.5	0.464286	0.444444	0.590909	0.777778	0.5625	0.5	0.625	0.42	0.575	0.666667	0.678571	0.46875	0.678571	0.4	0.722222	0.541667	0.6875	0.403846	0.615385	0.625	0.574074	0.583333	0.153846	intronic	ASIC2	.
17	34027734	rs9907439	G	A	NO	0.53125	0.5625	0.6875	0.571429	0.444444	0.6	0.75	0.535714	0.611111	0.590909	0.333333	0.541667	0.5	0.5	0.54	0.325	0.571429	0.5	0.53125	0.714286	0.5	0.777778	0.583333	0.5	0.576923	0.557692	0.5625	0.555556	0.5	0.307692	intronic	ASIC2	.
17	34065327	rs12602886	G	A	NO	0.53125	0.571429	0.708333	0.714286	0.666667	0.6	0.71875	0.5	0.694444	0.681818	0.444444	0.625	0.527778	0.625	0.58	0.325	0.666667	0.607143	0.625	0.75	0.75	0.888889	0.645833	0.5	0.6	0.634615	0.4375	0.648148	0.583333	0.230769	intronic	ASIC2	.
17	34072955	rs886359	G	A	NO	0.53125	0.5625	0.708333	0.714286	0.722222	0.6	0.75	0.535714	0.694444	0.681818	0.444444	0.645833	0.555556	0.625	0.58	0.35	0.690476	0.607143	0.625	0.75	0.75	0.888889	0.645833	0.5	0.615385	0.634615	0.4375	0.648148	0.666667	0.230769	intronic	ASIC2	.
17	34089440	rs886358	G	A	NO	0.53125	0.5625	0.708333	0.75	0.611111	0.6	0.75	0.571429	0.694444	0.636364	0.555556	0.666667	0.583333	0.75	0.58	0.3	0.690476	0.607143	0.625	0.75	0.75	0.888889	0.666667	0.5	0.615385	0.634615	0.25	0.666667	0.666667	0.346154	intronic	ASIC2	.
17	34102685	rs7225845	T	C	NO	0.75	0.9375	0.854167	1	0.944444	0.8	0.875	0.821429	0.9375	0.954545	0.861111	0.895833	0.888889	1	0.82	0.875	0.97619	0.928571	0.9	0.916667	0.85	0.944444	0.833333	0.84375	NA	0.942308	0.9375	0.846154	0.916667	0.615385	intronic	ASIC2	.
17	34117412	rs7221159	G	A	NO	0.71875	0.875	0.791667	0.821429	0.888889	0.733333	0.75	0.75	0.833333	0.909091	0.833333	0.875	0.833333	0.875	0.8	0.85	0.880952	0.892857	0.875	0.785714	0.75	0.777778	0.770833	0.78125	0.942308	0.865385	0.9375	0.796296	0.833333	0.461538	intronic	ASIC2	.
19	9206449	rs7260343	A	G	NO	0.625	NA	0.625	0.607143	0.666667	0.666667	0.5	0.5	0.75	0.5	0.666667	0.520833	0.777778	0.75	0.48	0.5	0.52381	0.428571	0.53125	0.714286	0.611111	0.555556	0.541667	0.5625	0.557692	0.653846	0.5625	0.648148	0.75	0.384615	intergenic	OR7D2;OR7D4	.
19	9208547	rs10407714	A	G	NO	0.78125	0.8125	0.729167	0.821429	0.777778	0.733333	0.65625	0.75	0.833333	0.681818	0.833333	0.708333	0.833333	0.875	0.64	0.725	0.738095	0.571429	0.59375	NA	0.7	0.666667	0.6875	0.71875	0.704545	0.807692	0.6875	0.740741	0.75	0.5	intergenic	OR7D2;OR7D4	.
19	48746441	rs12975781	C	T	NO	0.59375	0.5	0.541667	0.464286	0.5	0.9	0.6875	0.285714	0.333333	0.636364	0.388889	0.282609	0.5	0.5	0.44	0.325	0.690476	0.464286	0.766667	0.821429	0.8	0.722222	0.625	0.65625	0.442308	0.5	0.75	0.537037	0.666667	0.307692	UTR5	IZUMO1	.
19	48746538	rs8102032	C	T	NO	0.59375	0.5	0.583333	0.5	0.5	0.9	0.6875	0.285714	0.333333	0.636364	0.388889	0.291667	0.527778	0.5	0.44	0.35	0.690476	0.464286	0.75	0.821429	0.8	0.722222	0.645833	0.65625	0.442308	0.480769	0.75	0.537037	0.666667	0.307692	UTR5	IZUMO1	.
19	48746557	rs8104897	C	A	NO	0.59375	0.5	0.583333	0.464286	0.5	0.9	0.6875	0.285714	0.333333	0.636364	0.388889	0.291667	0.527778	0.5	0.44	0.35	0.690476	0.464286	0.75	0.821429	0.8	0.722222	0.645833	0.65625	0.442308	0.480769	0.75	0.537037	0.666667	0.307692	UTR5	IZUMO1	.
21	34819011	rs2834647	T	C	NO	1	1	1	0.928571	1	1	1	0.928571	1	1	0.944444	0.958333	0.972222	0.875	0.98	0.925	0.97619	0.964286	0.96875	0.964286	0.9	0.944444	1	0.90625	0.980769	0.961538	1	0.925926	1	0.769231	intronic	RUNX1	.
21	34830478	rs2226303	C	T	NO	0.9375	0.8125	0.9375	0.821429	1	0.933333	1	0.857143	0.833333	1	0.888889	0.875	0.916667	0.875	0.86	0.875	0.809524	0.892857	0.96875	0.892857	0.85	0.888889	0.958333	0.90625	0.980769	0.846154	1	0.833333	1	0.538462	intronic	RUNX1	.
21	34841582	rs2284612	T	C	NO	0.5	0.625	0.604167	0.5	0.611111	0.433333	0.65625	0.5	0.583333	0.545455	0.555556	0.604167	0.527778	0.5	0.54	0.55	0.52381	0.642857	0.40625	0.642857	0.7	0.5	0.583333	0.53125	0.480769	0.5	0.625	0.555556	0.666667	0.346154	intronic	RUNX1	.
21	34856063	rs2834651	C	T	NO	0.71875	0.6875	0.729167	0.714286	0.888889	0.833333	0.90625	0.714286	0.777778	0.636364	0.888889	0.791667	0.833333	0.625	0.82	0.675	0.809524	0.75	0.84375	0.785714	0.5	0.888889	0.8125	0.90625	0.76	0.75	0.75	0.814815	0.833333	0.461538	intronic	RUNX1	.
21	34858862	rs2834653	C	A	NO	0.6875	0.375	0.541667	0.535714	0.611111	0.8	0.875	0.535714	0.638889	0.5	0.444444	0.645833	0.694444	0.375	0.6	0.45	0.571429	0.464286	0.65625	0.678571	0.45	0.777778	0.625	0.84375	0.62	0.557692	0.6875	0.574074	0.666667	0.192308	intronic	RUNX1	.
21	34863442	rs2251826	G	A	NO	0.71875	0.4375	0.6875	0.571429	0.555556	0.733333	0.75	0.607143	0.666667	0.409091	0.388889	0.666667	0.694444	0.375	0.62	0.5	0.714286	0.535714	0.6875	0.692308	0.5	0.722222	0.666667	0.75	NA	0.538462	0.625	0.596154	0.666667	0.230769	intronic	RUNX1	.
21	34869632	rs2252585	C	T	NO	0.75	0.6875	0.895833	0.785714	0.944444	0.633333	0.71875	0.892857	0.861111	0.863636	0.944444	0.791667	0.833333	0.375	0.88	0.775	0.809524	0.75	0.875	0.857143	0.9	0.777778	0.875	0.9375	0.826923	0.865385	0.6875	0.796296	0.833333	0.423077	intronic	RUNX1	.
21	34872901	rs2300395	T	C	NO	0.6875	0.642857	0.75	0.392857	0.722222	0.8	0.625	0.785714	0.694444	0.681818	0.722222	0.75	0.694444	0.625	0.68	0.725	0.619048	0.678571	0.875	0.642857	0.85	0.888889	0.729167	0.75	0.653846	0.673077	0.5625	0.666667	0.916667	0.269231	intronic	RUNX1	.
21	34885728	rs2300401	C	T	NO	0.5625	0.5	0.666667	0.392857	0.722222	0.8	0.59375	0.714286	0.722222	0.727273	0.694444	0.75	0.638889	0.625	0.68	0.675	0.571429	0.607143	0.84375	0.642857	0.85	0.833333	0.666667	0.625	0.653846	0.64	0.5625	0.611111	0.916667	0.192308	intronic	RUNX1	.
21	34895121	rs8130963	G	A	NO	0.65625	0.5625	0.645833	0.5	0.722222	0.8	0.6875	0.75	0.75	0.772727	0.666667	0.75	0.694444	0.625	0.64	0.75	0.575	0.607143	0.84375	0.642857	0.85	0.777778	0.729167	0.8125	0.711538	0.711538	0.75	0.611111	0.916667	0.384615	intronic	RUNX1	.
21	34924881	rs4817699	T	C	NO	0.84375	0.9375	0.916667	0.821429	0.888889	0.9	0.8125	0.964286	0.916667	0.909091	0.75	0.916667	0.944444	0.75	0.92	0.9	0.928571	0.892857	0.90625	1	0.95	0.833333	0.895833	1	0.923077	0.884615	1	0.961538	0.916667	0.653846	intronic	RUNX1	.
21	34927368	rs764967	G	T	NO	0.9375	1	0.916667	0.892857	0.833333	0.933333	0.84375	0.964286	0.916667	0.909091	0.75	0.854167	0.916667	0.75	0.92	0.9	0.952381	0.892857	1	0.964286	1	0.888889	0.916667	1	0.884615	0.884615	1	0.925926	0.916667	0.692308	intronic	RUNX1	.
21	34949510	rs7281340	C	T	NO	0.8125	0.9375	0.916667	0.821429	0.888889	0.9	0.8125	0.928571	0.888889	1	0.833333	0.958333	0.944444	0.75	0.94	0.9	0.904762	0.928571	0.9	0.928571	0.95	0.833333	0.895833	0.96875	0.903846	0.865385	1	0.981481	1	0.576923	intronic	RUNX1	.
21	35044543	rs7280028	C	T	NO	0.90625	0.9375	0.875	0.821429	0.888889	0.933333	0.96875	0.892857	0.888889	0.954545	0.944444	0.895833	0.833333	0.875	0.94	0.85	0.928571	0.857143	0.9375	0.857143	0.85	0.833333	0.854167	1	0.903846	0.923077	0.8125	0.944444	0.916667	0.807692	intronic	RUNX1	.
1	8957145	rs2274333	A	G	YES	0.53125	0.5625	0.354167	0.464286	0.5	0.466667	0.59375	0.538462	0.416667	0.545455	0.5	0.4375	0.277778	0.625	0.36	0.325	0.428571	0.357143	0.34375	0.607143	0.65	0.555556	0.4375	0.34375	0.461538	0.403846	0.5625	0.5	0.75	0.230769	exonic	CA6	nonsynonymous
2	25157704	rs1866146	A	G	NO	0.40625	0.5	0.5	0.571429	0.555556	0.4	0.5625	0.607143	0.638889	0.454545	0.5	0.645833	0.472222	0.625	0.36	0.475	0.404762	0.321429	0.46875	0.607143	0.55	0.666667	0.479167	0.53125	0.423077	0.442308	0.5625	0.407407	0.333333	0.0769231	UTR3	EFR3B	.
3	7003768	rs1499161	C	A	NO	0.375	0.25	0.479167	0.285714	0.333333	0.533333	0.625	0.285714	0.5	0.545455	0.555556	0.375	0.333333	0.5	0.46	0.35	0.238095	0.464286	0.28125	NA	0.25	0.166667	0.479167	0.1875	NA	0.365385	0.5	0.326923	0.333333	0.192308	intronic	GRM7	.
3	7187182	rs2063880	A	G	NO	0.59375	0.75	0.4375	0.571429	0.5	0.666667	0.65625	0.571429	0.472222	0.590909	0.166667	0.458333	0.444444	0.625	0.56	0.3	0.309524	0.357143	0.46875	0.571429	0.5	0.5	0.5	0.65625	0.365385	0.442308	0.4375	0.444444	0.583333	0.192308	intronic	GRM7	.
3	7261220	rs1396409	G	A	NO	0.375	0.642857	0.541667	0.464286	0.444444	0.233333	0.65625	0.571429	0.583333	0.636364	0.25	0.5	0.416667	0.5	0.66	0.425	0.333333	0.392857	0.15625	0.321429	0.55	0.277778	0.458333	0.4375	0.442308	0.480769	0.625	0.444444	0.583333	0.153846	intronic	GRM7	.
6	88133658	rs9353525	G	A	NO	0.53125	0.125	0.229167	0.107143	0.222222	0.533333	0.46875	0.285714	0.166667	0.227273	0.388889	0.291667	0.25	0.25	0.28	0.125	0.333333	0.321429	0.46875	NA	0.45	0.722222	0.208333	0.75	0.134615	0.288462	0.625	0.259259	0.5	0.153846	intergenic	SPACA1;CNR1	.
6	154014015	rs712244	A	G	NO	0.46875	0.5	0.479167	0.607143	0.333333	0.4	0.65625	0.25	0.5	0.55	0.388889	0.583333	0.555556	0.375	0.46	0.5	0.5	0.321429	0.625	0.769231	0.65	0.444444	0.458333	0.53125	0.52	0.442308	0.75	0.537037	0.583333	0.230769	intronic	OPRM1	.
6	154039662	rs1799971	A	G	YES	0.4375	NA	0.333333	0.464286	0.333333	0.266667	0.46875	0.214286	0.388889	0.363636	0.361111	0.520833	0.388889	0.25	0.4	0.45	0.452381	0.285714	0.4375	0.571429	0.45	0.388889	0.395833	0.5	0.403846	0.461538	0.5625	0.462963	0.416667	0.115385	exonic	OPRM1	nonsynonymous
6	154244201	rs4314511	A	G	NO	0.5625	0.4375	0.416667	0.5	0.333333	0.633333	0.40625	0.357143	0.416667	0.318182	0.472222	0.416667	0.388889	0.375	0.26	0.45	0.380952	0.428571	0.53125	0.571429	0.6	0.611111	0.541667	0.34375	0.46	0.538462	0.4375	0.611111	0.416667	0.230769	intronic	IPCEF1;OPRM1	.
7	80459276	rs17147968	A	G	NO	0.375	0.5	0.25	0.285714	0.5	0.633333	0.53125	0.428571	0.25	0.136364	0.222222	0.3125	0.416667	0.375	0.3	0.525	0.380952	0.357143	0.4375	0.321429	0.5	0.388889	0.3125	0.40625	0.326923	0.211538	0.1875	0.388889	0.666667	0.230769	intronic	GNAT3	.
7	126581807	rs12536122	G	A	NO	0.21875	0.285714	0.541667	0.392857	0.5	0.466667	0.375	0.464286	0.46875	0.5	0.416667	0.333333	0.555556	0.5	0.58	0.475	0.5	0.464286	0.4375	0.5	0.4	0.444444	0.375	0.28125	0.326087	0.480769	0.25	0.388889	0.5	0.269231	intronic	GRM8	.
7	126665605	rs7779831	G	A	NO	0.21875	0.428571	0.541667	0.357143	0.5	0.533333	0.4375	0.464286	0.527778	0.5	0.388889	0.375	0.583333	0.5	0.58	0.475	0.5	0.5	0.40625	0.392857	0.3	0.388889	0.375	0.3125	0.384615	0.480769	0.6875	0.388889	0.583333	0.269231	intronic	GRM8	.
7	126687345	rs1008907	C	A	NO	0.21875	NA	0.583333	0.357143	0.5	0.533333	0.4375	0.464286	0.5	0.545455	0.361111	0.375	0.555556	0.5	0.58	0.5	0.52381	0.5	0.40625	0.392857	0.3	0.444444	0.375	0.3125	0.384615	0.442308	0.6875	0.388889	0.583333	0.192308	intronic	GRM8	.
7	126741195	rs2237768	G	A	NO	0.25	0.4375	0.583333	0.392857	0.444444	0.333333	0.375	0.464286	0.5	0.545455	0.361111	0.375	0.555556	0.5	0.56	0.45	0.52381	0.464286	0.5	0.392857	0.35	0.555556	0.375	0.3125	0.384615	0.423077	0.625	0.388889	0.333333	0.153846	intronic	GRM8	.
7	127000579	rs4728060	A	G	NO	0.28125	0.5	0.5	0.392857	0.444444	0.633333	0.53125	0.428571	0.470588	0.590909	0.388889	0.604167	0.527778	0.25	0.5	0.5	0.309524	0.392857	0.53125	NA	0.35	0.444444	0.333333	0.34375	0.456522	0.442308	0.625	0.481481	0.583333	0.269231	intronic	GRM8	.
7	127152110	rs2237795	A	G	NO	0.3125	0.25	0.3125	0.321429	0.444444	0.566667	0.59375	0.571429	0.361111	0.272727	0.388889	0.583333	0.444444	0.375	0.3	0.3	0.309524	0.428571	0.34375	0.571429	0.65	0.444444	0.354167	0.53125	0.269231	0.5	0.875	0.37037	0.416667	0.230769	intronic	GRM8	.
7	127206990	rs886004	A	G	NO	0.5	0.571429	0.291667	0.321429	0.555556	0.666667	0.625	0.678571	0.444444	0.181818	0.444444	0.541667	0.472222	0.5	0.5	0.35	0.5	0.464286	0.4375	0.5	0.75	0.333333	0.479167	0.5	0.5	0.615385	0.75	0.5	0.5	0.230769	intronic	GRM8	.
7	127209825	rs2237803	G	A	NO	0.5	0.5	0.3125	0.321429	0.5	0.633333	0.625	0.642857	0.416667	0.181818	0.416667	0.541667	0.472222	0.5	0.48	0.325	0.452381	0.464286	0.4375	0.464286	0.75	0.333333	0.458333	0.5	0.480769	0.615385	0.75	0.462963	0.5	0.192308	intronic	GRM8	.
7	141756392	rs12540335	A	C	NO	0.53125	NA	0.458333	0.321429	0.388889	0.733333	0.53125	0.357143	0.25	0.181818	0.555556	0.666667	0.388889	0.5	0.36	0.425	0.452381	0.642857	0.46875	NA	0.2	0.5	0.395833	0.40625	0.384615	0.365385	0.5625	0.481481	0.666667	0.192308	intergenic	SSBP1;TAS2R3	.
9	6567841	rs7870809	A	C	NO	0.75	0.75	0.333333	0.428571	0.444444	0.833333	0.65625	0.464286	0.444444	0.409091	0.5	0.375	0.444444	0.375	0.416667	0.35	0.404762	0.285714	0.59375	NA	0.7	0.444444	0.416667	0.433333	0.395833	0.346154	0.75	0.269231	0.666667	0.269231	intronic	GLDC	.
12	6338356	rs4149577	A	G	NO	0.375	0.5	0.416667	0.571429	0.5	0.7	0.65625	0.392857	0.444444	0.454545	0.5	0.479167	0.277778	0	0.48	0.5	0.428571	0.5	0.71875	0.571429	0.55	0.555556	0.4375	0.40625	0.538462	0.326923	0.625	0.37037	0.666667	0.269231	intronic	TNFRSF1A	.
14	72457178	rs12881810	A	G	NO	0.25	0.1875	0.25	0.357143	0.333333	0.566667	0.46875	0.428571	0.222222	0.227273	0.305556	0.333333	0.388889	0	0.1	0.25	0.285714	0.321429	0.25	0.25	0.1	0.277778	0.326087	0.21875	0.307692	0.25	0.5625	0.314815	0.583333	0.269231	intronic	RGS6	.
15	40279915	rs7169803	A	G	NO	0.34375	0.125	0.104167	0.178571	0.333333	0.433333	0.5	0.214286	0.25	0.181818	0.361111	0.270833	0.166667	0.125	0.2	0.225	0.309524	0.285714	0.40625	0.178571	0.25	0.0555556	0.270833	0.34375	0.346154	0.230769	0.8125	0.203704	0.75	0.423077	intergenic	PAK6(dist=2428),LOC100131244(dist=1529)	.
16	23296594	rs2887481	G	A	NO	0.46875	0.357143	0.604167	0.642857	0.5	0.2	0.53125	0.464286	0.638889	0.5	0.555556	0.541667	0.416667	0.625	0.4	0.475	0.547619	0.607143	0.625	0.571429	0.4	0.444444	0.625	0.4375	0.346154	0.596154	0.375	0.481481	0.25	0.269231	intergenic	SCNN1G;SCNN1B	.
16	53947509	rs9924877	G	A	NO	0.59375	0.5	0.229167	0.5	0.333333	0.733333	0.65625	0.535714	0.305556	0.590909	0.277778	0.458333	0.361111	0.375	0.38	0.45	0.309524	0.285714	0.65625	0.464286	0.4	0.444444	0.583333	0.46875	0.442308	0.461538	0.75	0.388889	0.583333	0.230769	intronic	FTO	.
17	3583408	rs224534	G	A	NO	0.625	NA	0.479167	0.428571	0.388889	0.6	0.625	0.321429	0.444444	0.636364	0.222222	0.354167	0.472222	0.5	0.36	0.475	0.452381	0.571429	0.625	0.607143	0.5	0.722222	0.4375	0.65625	0.442308	0.42	0.875	0.462963	0.5	0.115385	exonic	TRPV1	nonsynonymous
17	33050525	rs16581	G	A	NO	0.34375	0.25	0.173913	0.392857	0.388889	0.466667	0.375	0.285714	0.277778	0.227273	0.333333	0.395833	0.333333	0.25	0.16	0.2	0.428571	0.464286	0.25	0.178571	0.3	0.388889	0.395833	0.1875	0.269231	0.307692	0.375	0.37037	0.5	0.115385	intronic	ASIC2	.
17	33111440	rs9916435	C	A	NO	0.3125	0.375	0.166667	0.321429	0.277778	0.366667	0.3125	0.214286	0.222222	0.409091	0.444444	0.25	0.388889	0.25	0.32	0.175	0.404762	0.321429	0.15625	0.285714	0.4	0.444444	0.375	0.15625	0.25	0.403846	0.25	0.425926	0.333333	0	intronic	ASIC2	.
17	33362572	rs1394386	G	A	NO	0.5	0.4375	0.375	0.357143	0.5	0.6	0.40625	0.392857	0.305556	0.5	0.444444	0.416667	0.472222	0.625	0.32	0.4	0.452381	0.321429	0.46875	0.392857	0.65	0.277778	0.520833	0.21875	0.384615	0.346154	0.5625	0.5	0.833333	0.0769231	intronic	ASIC2	.
17	33423995	rs2036535	G	A	NO	0.40625	0.642857	0.479167	0.357143	0.611111	0.8	0.5625	0.535714	0.388889	0.181818	0.611111	0.520833	0.416667	0.375	0.3	0.425	0.47619	0.5	0.5625	0.392857	0.25	0.722222	0.458333	0.28125	0.288462	0.5	0.75	0.462963	0.75	0.346154	intronic	ASIC2	.
19	33800090	rs287104	A	G	NO	0.46875	0.6875	0.395833	0.5	0.444444	0.566667	0.46875	0.428571	0.416667	0.5	0.333333	0.520833	0.5	0.625	0.3	0.475	0.47619	0.285714	0.375	0.535714	0.55	0.666667	0.291667	0.40625	0.365385	0.403846	0.5625	0.462963	0.5	0.346154	intronic	KCTD15	.
19	33815993	rs29944	G	A	NO	0.625	0.3125	0.354167	0.5	0.555556	0.7	0.5	0.464286	0.444444	0.363636	0.333333	0.479167	0.472222	0.625	0.38	0.325	0.428571	0.428571	0.53125	0.535714	0.55	0.777778	0.354167	0.53125	0.346154	0.442308	0.4375	0.37037	0.416667	0.5	downstream	KCTD15	.
19	33818372	rs29942	G	A	NO	0.6	0.357143	0.354167	0.5	0.555556	0.7	0.5	0.464286	0.444444	0.363636	0.333333	0.479167	0.472222	0.625	0.38	0.325	0.428571	0.428571	0.53125	0.535714	0.55	0.777778	0.354167	0.53125	0.346154	0.442308	0.4375	0.37037	0.416667	0.461538	intergenic	KCTD15;LSM14A	.
21	34991865	rs11088302	G	A	NO	0.40625	0.0625	0.395833	0.464286	0.5	0.566667	0.40625	0.535714	0.444444	0.5	0.555556	0.479167	0.416667	0.375	0.5	0.5	0.333333	0.357143	0.40625	0.357143	0.5	0.444444	0.333333	0.3125	0.461538	0.461538	0.375	0.425926	0.416667	0.153846	intronic	RUNX1	.
3	7031136	rs1566366	C	T	NO	0.375	NA	0.458333	0.428571	0.444444	0.666667	0.625	0.357143	0.388889	0.409091	0.527778	0.354167	0.361111	0.5	0.38	0.4	0.261905	0.357143	0.375	0.142857	0.3	0.277778	0.416667	0.28125	0.461538	0.365385	0.5	0.259259	0.416667	0.115385	intronic	GRM7	.
3	7469204	rs7623055	T	G	NO	0.34375	NA	0.625	0.535714	0.444444	0.566667	0.4375	0.25	0.416667	0.454545	0.555556	0.5	0.555556	0.25	0.38	0.625	0.5	0.357143	0.21875	0.307692	0.4	0.222222	0.375	0.375	0.519231	0.25	0.5	0.5	0.583333	0.346154	intronic	GRM7	.
3	7509427	rs924353	T	C	NO	0.46875	0.375	0.375	0.357143	0.388889	0.633333	0.5	0.285714	0.388889	0.227273	0.527778	0.458333	0.472222	0.375	0.46	0.575	0.47619	0.464286	0.4375	0.285714	0.5	0.388889	0.479167	0.4375	0.346154	0.403846	0.75	0.407407	0.583333	0.192308	intronic	GRM7	.
7	22728630	rs2066992	G	T	NO	0.4375	0.428571	0.333333	0.571429	0.555556	0.433333	0.40625	0.464286	0.361111	0.409091	0.222222	0.166667	0.472222	0.25	0.22	0.3	0.5	0.321429	0.5	0.714286	0.55	0.555556	0.5625	0.875	0.384615	0.5	0.375	0.333333	0.416667	0.115385	intronic	IL6	.
7	126514182	rs2283065	T	C	NO	0.21875	0.4375	0.479167	0.428571	0.388889	0.233333	0.21875	0.428571	0.5	0.590909	0.388889	0.3125	0.555556	0.5	0.5	0.425	0.428571	0.535714	0.34375	0.25	0.15	0.388889	0.416667	0.15625	0.480769	0.307692	0.1875	0.388889	0.333333	0.115385	intronic	GRM8	.
7	127024098	rs978874	T	C	NO	0.46875	0.1875	0.5	0.428571	0.611111	0.566667	0.6875	0.392857	0.444444	0.272727	0.5	0.583333	0.388889	0.25	0.46	0.425	0.452381	0.428571	0.53125	0.571429	0.6	0.5	0.4375	0.6875	0.326923	0.442308	0.875	0.462963	0.583333	0.230769	intronic	GRM8	.
7	127041811	rs2237782	T	G	NO	0.28125	0.125	0.354167	0.321429	0.444444	0.433333	0.53125	0.392857	0.25	0.272727	0.361111	0.479167	0.333333	0.25	0.36	0.3	0.285714	0.357143	0.3125	0.464286	0.55	0.333333	0.291667	0.59375	0.211538	0.346154	0.8125	0.333333	0.5	0.115385	intronic	GRM8	.
7	127135144	rs2040502	T	C	NO	0.3125	0.1875	0.354167	0.321429	0.444444	0.466667	0.53125	0.428571	0.333333	0.3	0.361111	0.583333	0.361111	0.25	0.36	0.4	0.285714	0.357143	0.34375	0.576923	0.7	0.444444	0.3125	0.40625	0.25	0.384615	0.875	0.333333	0.416667	0.192308	intronic	GRM8	.
7	141764965	rs2270009	C	T	NO	0.53125	0.5	0.458333	0.321429	0.388889	0.733333	0.53125	0.357143	0.25	0.181818	0.555556	0.666667	0.388889	0.5	0.354167	0.425	0.452381	0.642857	0.46875	0.535714	0.2	0.5	0.395833	0.40625	0.384615	0.365385	0.5625	0.481481	0.666667	0.192308	exonic	TAS2R3	synonymous
7	141784294	rs2190245	G	T	NO	0.53125	0.5	0.479167	0.321429	0.388889	0.733333	0.53125	0.357143	0.222222	0.181818	0.555556	0.666667	0.388889	0.5	0.36	0.425	0.452381	0.642857	0.46875	NA	0.2	0.5	0.395833	0.40625	0.38	0.38	0.5625	0.481481	0.666667	0.192308	intergenic	TAS2R4;TAS2R5	.
10	113138334	rs3814573	C	T	NO	0.5	0.625	0.5625	0.464286	0.333333	0.433333	0.53125	0.428571	0.5	0.363636	0.611111	0.395833	0.444444	0.25	0.48	0.4	0.547619	0.392857	0.34375	0.642857	0.3	0.555556	0.4375	0.21875	0.288462	0.326923	0.5625	0.481481	0.583333	0.192308	intronic	TCF7L2	.
10	113149972	rs290487	C	T	NO	0.28125	0.5	0.229167	0.25	0.111111	0.6	0.4375	0.142857	0.305556	0.227273	0.25	0.333333	0.277778	0.125	0.24	0.3	0.309524	0.321429	0.09375	0.428571	0.2	0.222222	0.375	0.125	0.192308	0.24	0.625	0.277778	0.25	0.0769231	intronic	TCF7L2	.
12	6379284	rs11064153	T	C	YES	0.4375	0.1875	0.354167	0.285714	0.388889	0.533333	0.65625	0.428571	0.277778	0.363636	0.388889	0.5625	0.388889	0.125	0.32	0.3	0.428571	0.464286	0.375	0.5	0.3	0.388889	0.541667	0.5	0.365385	0.384615	0.5	0.351852	0.583333	0.269231	intergenic	SCNN1A(dist=1927),LTBR(dist=4907)	.
14	20219819	rs8014956	T	G	NO	0.34375	0.3125	0.375	0.464286	0.277778	0.566667	0.5625	0.464286	0.361111	0.454545	0.277778	0.3125	0.333333	0.25	0.38	0.425	0.309524	0.5	0.3125	0.285714	0.25	0.277778	0.416667	0.21875	0.346154	0.596154	0.625	0.314815	0.5	0.153846	intergenic	OR11G2(dist=21446),OR11H6(dist=3891)	.
14	72450618	rs4903023	T	C	NO	0.46875	0.375	0.4375	0.571429	0.444444	0.821429	0.65625	0.428571	0.305556	0.409091	0.527778	0.520833	0.527778	0	0.44	0.475	0.52381	0.5	0.5	0.571429	0.55	0.555556	0.458333	0.375	0.365385	0.384615	0.6875	0.518519	0.666667	0.538462	intronic	RGS6	.
14	72453899	rs4903024	C	T	NO	0.15625	0.125	0.145833	0.178571	0.277778	0.433333	0.34375	0.321429	0.194444	0.0909091	0.25	0.208333	0.194444	0	0.1	0.175	0.238095	0.214286	0.125	0.142857	0.05	0.222222	0.208333	0.03125	0.288462	0.16	0.4375	0.0740741	0.416667	0.192308	intronic	RGS6	.
15	40285207	rs2412505	T	C	NO	0.46875	0.3125	0.416667	0.464286	0.444444	0.433333	0.6875	0.357143	0.361111	0.5	0.5	0.458333	0.277778	0.125	0.4	0.375	0.428571	0.392857	0.53125	0.428571	0.45	0.611111	0.520833	0.375	0.615385	0.442308	0.9375	0.407407	0.833333	0.461538	intergenic	ANKRD63;PLCB2	.
17	3615766	rs150854	T	G	NO	0.5625	0.375	0.5	0.464286	0.722222	0.466667	0.46875	0.535714	0.472222	0.272727	0.416667	0.479167	0.527778	0.25	0.54	0.375	0.47619	0.321429	0.40625	0.464286	0.65	0.333333	0.375	0.25	0.596154	0.5	0.75	0.407407	0.666667	0.0769231	intronic	SHPK	.
17	33179477	rs319781	C	T	NO	0.34375	0.375	0.395833	0.357143	0.666667	0.4	0.40625	0.607143	0.416667	0.545455	0.416667	0.395833	0.361111	0	0.24	0.5	0.357143	0.357143	0.53125	0.214286	0.3	0.5	0.375	0.59375	0.326923	0.615385	0.125	0.462963	0.416667	0.0769231	intronic	ASIC2	.
17	33204599	rs319788	T	C	NO	0.34375	0.1875	0.354167	0.357143	0.611111	0.6	0.46875	0.464286	0.388889	0.454545	0.333333	0.375	0.361111	0.125	0.26	0.425	0.333333	0.285714	0.53125	0.214286	0.45	0.555556	0.458333	0.53125	0.307692	0.326923	0.6875	0.37037	0.5	0.0384615	intronic	ASIC2	.
17	33378396	rs1394391	G	T	NO	0.3125	0.142857	0.270833	0.357143	0.333333	0.8	0.375	0.214286	0.361111	0.181818	0.361111	0.416667	0.333333	0.125	0.1	0.275	0.380952	0.178571	0.25	0.0714286	0.3	0.333333	0.1875	0.15625	0.211538	0.307692	0.6875	0.259259	0.5	0.0769231	intronic	ASIC2	.
17	33397339	rs9895229	C	T	NO	0.6875	0.5	0.354167	0.428571	0.388889	0.8	0.46875	0.357143	0.388889	0.409091	0.388889	0.4375	0.25	0.375	0.2	0.3	0.428571	0.25	0.5	0.428571	0.45	0.333333	0.4375	0.375	0.288462	0.442308	0.75	0.592593	0.666667	0.384615	intronic	ASIC2	.
17	33418143	rs4795781	T	C	NO	0.21875	0.25	0.25	0.25	0.388889	0.7	0.25	0.214286	0.305556	0.272727	0.361111	0.395833	0.138889	0.125	0.12	0.175	0.238095	0.142857	0.3125	0.178571	0.15	0.333333	0.229167	0.09375	0.115385	0.288462	0.5	0.296296	0.5	0.0769231	intronic	ASIC2	.
17	33847586	rs317391	T	C	NO	0.21875	0.1875	0.1875	0.0357143	0.277778	0.433333	0.3125	0.142857	0.277778	0.272727	0.0555556	0.229167	0.166667	0	0.08	0.225	0.119048	0.178571	0.21875	0.178571	0.25	0.222222	0.125	0.375	0.115385	0.365385	0.6875	0.12963	0.333333	0.0769231	intronic	ASIC2	.
21	34922045	rs2834676	C	T	NO	0.25	0.3125	0.3125	0.607143	0.222222	0.666667	0.46875	0.25	0.527778	0.454545	0.472222	0.375	0.333333	0.25	0.52	0.4	0.404762	0.428571	0.28125	0.214286	0.2	0.111111	0.5	0.25	0.365385	0.211538	0.625	0.444444	0.416667	0.115385	intronic	RUNX1	.
21	34941321	rs8126567	C	T	NO	0.21875	0.375	0.354167	0.607143	0.277778	0.6	0.46875	0.25	0.555556	0.409091	0.472222	0.375	0.305556	0.25	0.52	0.3	0.404762	0.392857	0.28125	0.214286	0.25	0.111111	0.458333	0.25	0.326923	0.365385	0.625	0.37037	0.333333	0.153846	intronic	RUNX1	.
